# Supplementary material for: Defining tumor-associated vascular heterogeneity in pediatric high-grade and diffuse midline gliomas
Source: Acta Neuropathol Commun. 2021 Aug 23;9:142. doi: 10.1186/s40478-021-01243-1 (PMC8381557; doi:10.1186/s40478-021-01243-1)
Supplement: Supplementary file 2 — Additional file 2 contains data related to transcriptional analysis of endothelial samples from normal brain regions, IUE pHGG and IUE DMG mouse models. Tab1: DEGs comparing DMG vs. pHGG ECs; Tab2: DEGs comparing BS vs. DMG ECs; Tab3: DEGs comparing Ctx vs. pHGG ECs; Tab 4: Pathways enriched in pHGG ECs compared to DMG ECs; Tab5: Pathways enriched in DMG ECs compared to pHGG ECs. [file 40478_2021_1243_MOESM2_ESM.xlsx]

## Sheet: DEG_DMG_vs_pHGG_EC
Gene ID	logFC	AveExpr	t	P.Value	adj.P.Val
Cd244	7.042	1.236	5.234	0.0005088	0.003937
Il13ra2	6.911	-0.9692	3.887	0.00357	0.01482
Il1b	6.892	3.246	3.449	0.007091	0.02424
Klk9	6.776	-0.4262	7.018	5.674e-05	0.001103
Abcc3	6.747	3.338	5.983	0.0001926	0.00218
Slamf6	6.667	-0.3846	7.113	5.103e-05	0.001039
Dyrk4	6.627	-0.8952	9.25	6.028e-06	0.0004113
Apob	6.57	-0.2304	3.951	0.003237	0.01383
Cst7	6.531	3.788	8.035	1.923e-05	0.0006388
Lilrb4a	6.479	2.18	4.39	0.001674	0.008765
Mlxipl	6.454	0.8887	5.955	0.0001995	0.002221
Hpse	6.452	1.785	3.829	0.003905	0.0158
Gpr35	6.434	2.378	5.605	0.0003114	0.002935
1810011H11Rik	6.433	1.022	4.202	0.00221	0.01061
C130026I21Rik	6.411	0.404	5.447	0.0003828	0.003323
Nlrp3	6.401	2.252	3.129	0.01188	0.03545
Itgad	6.383	0.2464	5.324	0.0004511	0.003648
B430306N03Rik	6.346	0.9275	7.019	5.666e-05	0.001103
Tspan32	6.209	0.2546	5.718	0.0002693	0.002674
Sh2d1b1	6.175	-0.7305	6.959	6.059e-05	0.00114
Il1rn	6.144	1.403	3.758	0.00436	0.01711
B3gnt7	6.136	1.662	5.605	0.0003115	0.002935
Cryba4	6.124	0.2539	4.967	0.0007329	0.005056
Clec7a	6.117	5.221	6.236	0.0001411	0.001802
4930502E18Rik	6.104	-1.048	6.94	6.189e-05	0.001149
Tifab	6.087	3.168	10.45	2.145e-06	0.0002733
Pkib	6.065	0.3859	7.116	5.087e-05	0.001038
Ppfia4	6.025	2.065	4.885	0.0008215	0.005495
Milr1	6.019	1.566	6.673	8.405e-05	0.001321
Tbxas1	6.008	3.286	6.104	0.0001658	0.00198
BC035044	5.971	0.6607	5.051	0.000653	0.004675
Bcl2a1b	5.95	1.926	4.475	0.001477	0.008045
Itgam	5.947	6.748	9.678	4.123e-06	0.000378
Siglec1	5.905	3.429	7.451	3.532e-05	0.0008535
Siglecf	5.88	2.29	5.075	0.0006313	0.00456
Ms4a6d	5.873	3.897	7.483	3.412e-05	0.0008438
Hcar2	5.869	3.995	5.99	0.0001908	0.002164
Scimp	5.868	-0.1353	6.008	0.0001866	0.002137
Itgax	5.86	4.81	9.625	4.318e-06	0.0003813
Hk3	5.828	2.718	5.253	0.000496	0.00387
Trpm2	5.824	2.988	7.132	4.997e-05	0.001028
Pirb	5.823	0.03996	3.766	0.004306	0.01695
C920009B18Rik	5.822	-1.003	5.7	0.0002754	0.002721
Pilra	5.815	2.616	8.91	8.23e-06	0.0004413
Cd33	5.815	2.619	6.303	0.0001301	0.00173
5430427O19Rik	5.812	0.7368	5.014	0.0006867	0.004827
Cd84	5.793	4.127	7.47	3.46e-05	0.000846
Hal	5.75	0.356	3.155	0.01139	0.03439
Fcgr2b	5.742	4.113	5.789	0.0002458	0.002518
Cd300lf	5.742	2.149	6.09	0.0001686	0.002
Glipr1	5.736	0.7952	4.501	0.001422	0.00786
Bcl2a1a	5.73	0.3924	6.116	0.0001633	0.001962
Haao	5.708	-1.15	6.842	6.919e-05	0.001199
Bach2os	5.699	-1.039	4.408	0.001628	0.008584
H2-Oa	5.692	0.2336	3.722	0.004613	0.01773
Lair1	5.689	4.387	8.864	8.596e-06	0.0004514
Btnl2	5.689	0.6263	5.496	0.0003589	0.003202
Slc2a5	5.684	2.082	2.864	0.01833	0.04869
Ctss	5.671	9.211	8.201	1.629e-05	0.0005993
Dmrtb1	5.662	1.708	3.558	0.005966	0.02137
P2ry13	5.604	4.85	7.094	5.214e-05	0.001048
Lag3	5.599	4.834	5.636	0.0002993	0.002871
Cd72	5.591	2.936	4.004	0.002985	0.01303
Saa3	5.581	-0.7167	3.831	0.003889	0.01577
Spp1	5.569	7.297	7.445	3.556e-05	0.0008559
Dnase1l3	5.559	2.36	4.366	0.001733	0.008997
Dock2	5.557	5.076	9.579	4.496e-06	0.0003813
Csn2	5.549	-0.7378	4.556	0.001313	0.007428
Fcgr1	5.541	5.595	9.179	6.425e-06	0.0004121
Mgarp	5.538	-2.018	9.675	4.134e-06	0.000378
Emilin2	5.534	4.192	7.582	3.073e-05	0.0008074
Ptpn7	5.532	0.7766	5.843	0.0002296	0.002412
Adora3	5.532	0.6169	5.38	0.0004183	0.003485
Galnt3	5.518	0.7245	6.117	0.0001632	0.001962
Havcr2	5.515	4.253	7.565	3.129e-05	0.0008108
Hrh2	5.5	-1.334	6.388	0.0001175	0.001623
Pram1	5.481	-0.5633	5.89	0.0002163	0.002334
Clec2i	5.477	-0.2927	4.834	0.0008827	0.00575
Rac2	5.476	4.546	6.951	6.117e-05	0.001142
Cd36	5.457	3.451	5.882	0.0002187	0.002354
Pik3ap1	5.452	3.552	6.386	0.0001178	0.001624
Egln3	5.45	1.929	3.583	0.005732	0.02083
Arhgap9	5.444	1.495	5.186	0.0005432	0.004113
C3	5.436	5.109	4.71	0.001052	0.006416
Il1a	5.433	4.422	4.605	0.001223	0.007094
Vav1	5.432	4.512	8.996	7.603e-06	0.0004319
Ccdc88b	5.432	3.328	7.941	2.116e-05	0.0006681
Spns3	5.421	-0.9839	6.938	6.209e-05	0.001149
Ncf4	5.402	3.263	6.366	0.0001206	0.00165
A130077B15Rik	5.392	-0.7934	6.506	0.0001022	0.00149
Btk	5.391	2.437	6.969	5.993e-05	0.001135
C3ar1	5.382	4.599	5.465	0.0003739	0.003269
Arl11	5.363	1.687	5.571	0.0003253	0.003016
A530064D06Rik	5.362	-0.9563	6.717	7.987e-05	0.0013
Runx3	5.356	1.41	3.872	0.003652	0.01508
Clec5a	5.353	2.811	9.713	4.001e-06	0.000378
C1qc	5.351	7.848	9.451	5.033e-06	0.0003873
Ccl4	5.341	3.338	4.188	0.002259	0.01076
Fam19a1	5.322	-0.4946	3.458	0.006991	0.02408
Trem2	5.311	4.831	8.127	1.754e-05	0.0006175
Pvrl4	5.31	1.086	5.906	0.0002119	0.0023
Tlr7	5.306	4.1	6.972	5.97e-05	0.001132
H2-Ob	5.305	1.269	5.783	0.0002477	0.002536
Capn3	5.301	3.902	5.672	0.0002854	0.002791
Cd68	5.292	5.276	8.837	8.815e-06	0.000459
Tmem8c	5.279	-1.352	6.951	6.119e-05	0.001142
B230209E15Rik	5.273	-0.8092	3.422	0.00741	0.02507
Lat2	5.268	3.524	7.073	5.337e-05	0.001062
Osm	5.265	2.847	4.262	0.002022	0.009974
Hvcn1	5.248	4.076	7.66	2.832e-05	0.0007657
Stra6l	5.244	-0.2708	4.59	0.00125	0.007181
Lpar5	5.241	0.1159	5.517	0.0003494	0.003158
Lrrc3	5.235	4.016	10.71	1.74e-06	0.0002433
Rab39	5.235	-0.2176	6.562	9.558e-05	0.001432
Ly86	5.233	5.953	6.961	6.047e-05	0.00114
AI427809	5.232	-1.007	4.637	0.001168	0.00687
Ncf1	5.219	5.348	11.25	1.145e-06	0.0002003
Gal3st4	5.217	2.061	4.211	0.002183	0.01054
Tnfrsf13b	5.209	-1.278	5.323	0.0004517	0.003648
Tnfrsf9	5.204	1.57	3.072	0.01303	0.03795
F9	5.191	-0.8079	5.384	0.0004162	0.003474
Tnfaip8l2	5.18	2.6	5.295	0.0004685	0.003724
Stag3	5.167	-1.352	5.863	0.0002239	0.002382
Fcgr4	5.165	3.986	9.139	6.664e-06	0.0004164
Bin2	5.165	4.588	8.395	1.345e-05	0.0005517
Igsf6	5.154	2.747	6.042	0.000179	0.002077
Hck	5.152	4.131	10.25	2.528e-06	0.0003016
Sla	5.152	4.344	7.004	5.765e-05	0.001112
AF251705	5.15	3.724	6.956	6.079e-05	0.00114
Cd86	5.148	3.71	7.441	3.57e-05	0.0008559
Gpr84	5.128	3.059	4.529	0.001365	0.007644
Aif1	5.125	5.455	9.532	4.688e-06	0.0003813
F2rl2	5.123	-0.4916	4.463	0.001503	0.008132
Afp	5.115	-0.5028	4.104	0.002562	0.01174
Atp1a3	5.102	4.585	12.53	4.5e-07	0.0001406
March1	5.095	2.876	9.166	6.502e-06	0.0004121
Fyb	5.083	4.422	7.743	2.596e-05	0.0007388
Fcgr3	5.08	5.651	8.619	1.084e-05	0.0005071
Nckap1l	5.079	5.801	8.769	9.397e-06	0.0004775
Adgre1	5.071	5.1	7.074	5.331e-05	0.001062
Cd200r1	5.07	-0.3734	4.294	0.001927	0.009658
C5ar1	5.066	2.572	4.325	0.001842	0.009353
Trem1	5.063	-0.9992	4.882	0.0008249	0.005502
Bcl2a1d	5.062	0.4861	7.268	4.306e-05	0.0009562
Ugt1a7c	5.051	0.4772	4.763	0.0009755	0.006128
Fgd2	5.034	3.117	6.187	0.0001497	0.001866
Wdfy4	5.033	3.617	9.567	4.544e-06	0.0003813
C1qa	5.032	8.35	9.382	5.354e-06	0.0003895
Ly9	5.03	3.22	7.488	3.396e-05	0.0008438
Ccl12	5.008	2.843	3.822	0.003946	0.01591
Slamf9	5	3.142	10.92	1.475e-06	0.0002304
C1qb	4.991	8.118	8.225	1.591e-05	0.0005964
Gna15	4.985	3.358	4.786	0.0009443	0.005995
Ccr1	4.984	2.817	5.807	0.0002403	0.002483
Adcy7	4.983	4.071	11.55	9.119e-07	0.0001958
Susd1	4.981	0.07952	5.371	0.0004233	0.003507
A530032D15Rik	4.977	-1.19	7.558	3.151e-05	0.0008108
Csn3	4.966	0.6674	3.955	0.003213	0.01375
9530059O14Rik	4.962	-0.7157	4.289	0.001941	0.009696
Myo1f	4.961	4.418	8.73	9.751e-06	0.0004775
BC147527	4.943	-0.7982	6.244	0.0001397	0.001792
Itgb2	4.939	5.579	7.217	4.551e-05	0.0009856
Hpgds	4.938	3.43	7.207	4.602e-05	0.0009932
Bank1	4.935	-0.2705	5.335	0.0004442	0.003614
Apbb1ip	4.929	4.599	7.917	2.168e-05	0.0006746
Cx3cr1	4.919	7.268	7.767	2.53e-05	0.0007313
Lgals3	4.902	4.369	5.947	0.0002013	0.002231
Tnfsf13b	4.902	0.8526	4.567	0.001292	0.007344
P2ry6	4.893	4.065	7.541	3.207e-05	0.0008189
Cacna1s	4.88	-0.1366	6.516	0.0001009	0.00148
Slc11a1	4.874	4.853	10.24	2.558e-06	0.0003024
Cd48	4.872	2.935	7.635	2.905e-05	0.0007783
Pld4	4.866	5.671	9.374	5.39e-06	0.0003895
Htr5b	4.865	-1.059	4.527	0.001369	0.007655
Treml2	4.859	2.586	6.671	8.423e-05	0.001322
Ms4a6c	4.857	4.038	8.378	1.368e-05	0.0005573
Unc5cl	4.852	-0.7201	5.493	0.0003604	0.003209
Tlr13	4.844	4.149	9.904	3.396e-06	0.0003551
Mpeg1	4.844	8.301	7.83	2.37e-05	0.0007003
Ccr5	4.825	4.83	7.486	3.404e-05	0.0008438
Cd180	4.824	4.925	12.45	4.768e-07	0.0001417
Themis2	4.819	2.713	7.163	4.831e-05	0.001019
Lpcat2	4.818	4.965	8.064	1.869e-05	0.0006348
Spi1	4.813	4.328	8.008	1.978e-05	0.0006431
AB124611	4.809	2.654	5.25	0.0004981	0.003884
Gng3	4.793	1.512	3.987	0.00306	0.01329
Csf3r	4.79	4.254	7.397	3.744e-05	0.0008774
Blnk	4.784	2.512	5.011	0.0006901	0.004845
Cox6a2	4.783	-0.1317	4.501	0.001422	0.00786
AA467197	4.779	1.423	4.756	0.0009861	0.006162
Ptpn6	4.778	4.825	10.97	1.421e-06	0.0002288
E230029C05Rik	4.774	1.173	4.622	0.001193	0.006964
Cd53	4.758	5.5	7.521	3.276e-05	0.0008329
Rgs1	4.758	3.84	4.233	0.002112	0.01029
Tnf	4.753	5.236	4.063	0.002728	0.01228
Tnfsf14	4.753	-1.032	3.773	0.004261	0.01684
C5ar2	4.744	-0.6848	5.732	0.0002646	0.002644
Fcer1g	4.741	5.198	9.223	6.174e-06	0.0004113
Rnase1	4.738	-0.4995	3.79	0.004148	0.01654
Ptafr	4.726	0.6842	4.069	0.002702	0.01218
Arhgap4	4.724	3.141	13.07	3.123e-07	0.0001314
Plek	4.721	6.316	8.201	1.629e-05	0.0005993
Cnr2	4.711	1.73	4.907	0.0007972	0.00537
Emx2	4.707	-1.835	7.025	5.627e-05	0.0011
2610528A11Rik	4.706	-1.162	5.754	0.0002571	0.002591
Siglech	4.694	4.393	5.836	0.0002316	0.002422
Cyp4f18	4.684	2.014	3.381	0.007916	0.02639
Cd37	4.68	3.928	7.259	4.345e-05	0.0009598
Rxrg	4.675	-0.09605	6.151	0.0001565	0.001912
Coro1a	4.666	5.912	12.15	5.88e-07	0.0001598
Rasal3	4.665	3.905	9.778	3.782e-06	0.000378
Ikzf1	4.657	4.346	8.007	1.98e-05	0.0006431
Arhgap30	4.64	3.973	10.51	2.054e-06	0.0002695
Cd52	4.638	4.506	8.068	1.861e-05	0.0006348
Cela1	4.634	0.4065	5.061	0.0006435	0.004627
Alox5ap	4.632	4.015	4.68	0.001099	0.006592
Car9	4.626	-0.9791	6.259	0.0001373	0.001778
Pvt1	4.626	1.087	5.265	0.000488	0.003825
Was	4.614	2.783	8.431	1.299e-05	0.0005412
Fam19a2	4.612	0.5603	5.47	0.0003716	0.00326
Map3k19	4.61	0.4962	6.111	0.0001643	0.00197
Cxcr2	4.604	0.2959	4.284	0.001956	0.009752
Itgal	4.595	4.243	7.895	2.217e-05	0.0006787
Tyrobp	4.593	5.392	7.987	2.019e-05	0.0006449
Card9	4.589	1.677	8.058	1.879e-05	0.0006348
Lst1	4.573	1.687	4.157	0.002367	0.01112
Ptprn	4.561	2.942	5.228	0.0005127	0.003963
0610040J01Rik	4.548	1.992	4.389	0.001675	0.008769
Apoc1	4.538	1.577	3.866	0.003684	0.01518
Mcemp1	4.536	-0.9245	5.695	0.0002772	0.002735
Gm2115	4.536	0.587	3.878	0.003618	0.01496
Slc37a2	4.528	2.913	4.812	0.0009113	0.005859
Cd300a	4.523	2.384	5.742	0.0002611	0.00262
Lilr4b	4.522	0.7527	2.867	0.01824	0.04856
Irg1	4.518	1.839	3.452	0.007066	0.0242
Psd4	4.509	2.567	7.151	4.893e-05	0.001024
Sash3	4.508	3.315	8.017	1.959e-05	0.0006417
Fam105a	4.501	4.235	7.314	4.094e-05	0.0009231
Lrrc25	4.495	2.135	5.593	0.0003164	0.002968
Plcb2	4.464	3.312	9.525	4.716e-06	0.0003813
Csf1r	4.46	8.232	6.45	0.0001091	0.001549
Rnf180	4.457	1.694	4.967	0.0007331	0.005056
Reln	4.438	2.445	3.234	0.01002	0.03125
Fcrls	4.435	5.938	4.863	0.0008478	0.005596
Clec2l	4.434	-1.072	7.487	3.4e-05	0.0008438
Slitrk4	4.427	-0.3945	5.144	0.0005751	0.004276
C130050O18Rik	4.419	1.217	8.248	1.554e-05	0.0005845
Slc16a3	4.413	3.844	5.483	0.0003651	0.003238
P2ry12	4.408	6.329	6.495	0.0001034	0.001503
Synpr	4.408	0.8327	3.27	0.00945	0.0299
Clec4a3	4.406	2.14	3.496	0.006589	0.02302
Pdcd1	4.397	2.113	3.485	0.006702	0.02335
Ermap	4.393	-1.595	5.419	0.0003976	0.00338
Olfml3	4.391	6.739	9.161	6.532e-06	0.0004121
Dennd1c	4.377	0.5392	5.956	0.0001991	0.002221
Gpnmb	4.369	5.008	6.692	8.218e-05	0.001308
Ctse	4.363	3.945	3.883	0.003592	0.01488
Tfap2b	4.362	1.751	2.915	0.01687	0.0458
Kcne3	4.354	0.6466	3.982	0.003084	0.01337
Csf2rb	4.334	4.841	9.669	4.156e-06	0.000378
Apobr	4.33	2.203	6.428	0.0001121	0.001573
AW551984	4.329	-0.5255	4.336	0.001812	0.009274
Ifi30	4.323	5.413	7.283	4.234e-05	0.0009444
Tnni2	4.319	-0.9044	4.883	0.0008247	0.005502
Fgr	4.316	3.399	12.39	4.967e-07	0.0001417
Myo1g	4.307	2.504	5.235	0.000508	0.003933
Ptgs1	4.3	6.105	13.51	2.338e-07	0.0001193
Gap43	4.285	5.185	7.384	3.794e-05	0.0008844
Tmem119	4.275	6.318	8.047	1.901e-05	0.0006372
Fbn2	4.264	3.472	4.604	0.001226	0.007099
Sh2d5	4.264	-0.3318	4.785	0.0009464	0.006
Liph	4.26	1.415	7.162	4.836e-05	0.001019
Alox15	4.26	-0.5559	5.513	0.0003509	0.003162
Neurl1a	4.259	3.075	7.203	4.623e-05	0.0009946
Tns4	4.255	0.5175	4.736	0.001013	0.006282
Ticam2	4.254	2.518	4.077	0.002671	0.01211
Cd8a	4.239	-0.2942	3.607	0.005521	0.02029
Gpr34	4.236	4.454	4.525	0.001374	0.007676
Slco4a1	4.234	2.021	9.53	4.693e-06	0.0003813
Rprm	4.234	1.648	4.845	0.0008691	0.005688
Rhoh	4.232	2.711	5.226	0.000514	0.003968
Fmn1	4.232	2.247	5.018	0.0006831	0.004815
Cd22	4.218	1.82	5.073	0.0006333	0.004567
Ccl3	4.217	3.52	4.757	0.0009841	0.006156
Fxyd7	4.2	0.5719	4.291	0.001936	0.009686
B4galnt1	4.187	3.668	11.38	1.041e-06	0.0002003
Lgi2	4.169	-1.402	5.847	0.0002285	0.00241
Adgrg5	4.162	2.374	7.809	2.424e-05	0.0007084
Il10ra	4.158	4.927	6.845	6.899e-05	0.001199
Fermt3	4.157	4.981	13.22	2.825e-07	0.0001314
Rassf5	4.149	2.755	6.174	0.0001522	0.001881
Esm1	4.147	4.955	3.748	0.004429	0.01728
C4a	4.146	2.48	7.192	4.679e-05	0.001002
Celf3	4.126	-0.728	4.958	0.0007419	0.005092
Ccr6	4.118	1.092	2.873	0.01806	0.04818
Ms4a4c	4.11	1.294	5.721	0.0002683	0.002667
Chrm3	4.106	-0.3188	4.74	0.001008	0.006259
Syt4	4.094	5.263	8.494	1.221e-05	0.0005332
Sh3bp1	4.094	2.768	8.287	1.496e-05	0.0005723
Ccl6	4.094	3.41	4.522	0.00138	0.007699
Rnf128	4.094	2.516	4.102	0.002569	0.01176
Dusp27	4.084	3.401	7.063	5.394e-05	0.001065
Dcstamp	4.064	-1.51	3.325	0.008652	0.02816
Bhlhe41	4.062	4.929	7.35	3.937e-05	0.0009075
Syngr1	4.044	3.957	7.038	5.547e-05	0.00109
Hcst	4.044	-1.167	5.418	0.000398	0.00338
Pou2f2	4.033	2.964	5.389	0.0004135	0.003461
Gm10790	4.022	-0.6916	4.867	0.0008429	0.005576
Lpxn	4.018	2.683	4.682	0.001095	0.00658
Mlip	4.017	-1.077	4.975	0.0007251	0.005019
Plch1	4.016	2.213	7.664	2.818e-05	0.0007657
Hexb	4	8.986	9.91	3.378e-06	0.0003551
Cnih2	3.996	0.1602	3.863	0.003706	0.01525
Slc7a14	3.984	-0.5311	4.253	0.00205	0.01006
Sv2c	3.98	0.5768	3.235	0.01	0.03123
Gpr65	3.979	2.289	4.013	0.002944	0.01294
Il21r	3.971	3.183	5.905	0.0002123	0.002301
Cacng8	3.971	-0.2859	4.321	0.001851	0.009392
Syt6	3.97	1.641	5.512	0.0003514	0.003165
Il1rl2	3.968	1.56	7.291	4.198e-05	0.0009402
Rgs10	3.966	4.894	7.322	4.057e-05	0.0009163
Eya4	3.963	1.334	5.955	0.0001995	0.002221
Capn6	3.95	3.52	5.357	0.0004312	0.003554
Alox5	3.95	1.865	3.073	0.01301	0.03791
Ccl2	3.944	2.702	3.321	0.008711	0.02829
Kcnd1	3.943	1.239	4.556	0.001313	0.007428
Hmga2	3.941	1.745	4.305	0.001897	0.009546
Rab20	3.941	1.943	3.185	0.01085	0.03322
Hmga2-ps1	3.938	1.902	4.859	0.0008529	0.005613
Ptprc	3.937	5.151	9.827	3.627e-06	0.0003682
Col6a3	3.925	4.673	5.207	0.0005273	0.004022
Nfatc2	3.92	1.656	5.042	0.0006607	0.004707
En2	3.911	-0.1516	4.831	0.0008872	0.005762
Susd3	3.911	1.118	4.023	0.002898	0.0128
Laptm5	3.898	8.323	9.458	5.002e-06	0.0003873
Sez6	3.895	2.918	3.033	0.0139	0.0398
Hk2	3.883	4.37	6.035	0.0001805	0.00209
Fmnl1	3.878	4.695	7.434	3.598e-05	0.0008602
Selplg	3.872	5.841	5.796	0.0002436	0.002504
Pde3b	3.86	4.813	8.589	1.115e-05	0.0005103
Lcp2	3.851	5.488	13.23	2.808e-07	0.0001314
5031414D18Rik	3.851	0.8279	4.084	0.002641	0.01202
Sall1	3.836	4.387	9.705	4.029e-06	0.000378
Parvg	3.832	4.811	10.29	2.457e-06	0.0002986
Gpr55	3.82	2.766	4.95	0.0007506	0.005138
Oas3	3.82	2.14	4.834	0.0008832	0.00575
Arhgap22	3.82	2.186	4.469	0.00149	0.008082
Lhfpl3	3.817	3.323	7.544	3.199e-05	0.0008186
Col20a1	3.814	2.645	3.689	0.004852	0.01841
Klrb1b	3.807	0.9769	3.305	0.008937	0.02872
Rnase6	3.8	0.5944	3.338	0.008476	0.02773
H2-Eb1	3.795	7.178	3.759	0.00435	0.01708
Ak1	3.785	4.105	4.717	0.001042	0.006383
Irf8	3.783	5.922	5.665	0.0002882	0.002812
Lrguk	3.782	0.2988	5.905	0.0002123	0.002301
Snx20	3.78	2.872	5.921	0.000208	0.002273
C2	3.776	4.362	5.863	0.0002238	0.002382
Prr36	3.773	-0.01598	4.598	0.001236	0.007131
Card11	3.773	0.4889	3.763	0.004328	0.01703
Barx2	3.769	-0.7382	4.878	0.0008305	0.005521
Lalba	3.75	0.3577	3.992	0.003037	0.01321
Basp1	3.741	6.213	12.67	4.094e-07	0.0001343
H2-Aa	3.728	8.267	3.539	0.00615	0.02186
Nlrp1b	3.724	2.154	5.303	0.0004634	0.003712
Galnt12	3.721	0.6164	3.644	0.005208	0.01944
Abcd2	3.72	3.69	7.712	2.681e-05	0.0007475
Tlr12	3.718	3.005	6.247	0.0001392	0.001787
Akr1b8	3.716	2.103	4.871	0.0008378	0.005553
Hmha1	3.715	4.237	7.832	2.368e-05	0.0007003
Sox11	3.711	4.405	4.38	0.001697	0.008834
Cybb	3.69	4.636	5.31	0.0004593	0.003691
Cd101	3.687	-0.864	4.449	0.001533	0.008238
5730559C18Rik	3.682	2.029	6.079	0.0001709	0.002021
Matk	3.677	0.1191	3.949	0.003243	0.01385
Tlr9	3.672	2.906	5.292	0.0004705	0.003726
Pdlim4	3.671	3.018	5.913	0.0002101	0.002289
Sall3	3.67	2.929	5.124	0.0005904	0.004351
H19	3.67	5.283	4.867	0.000843	0.005576
Erich3	3.67	0.606	3.366	0.0081	0.02683
I830077J02Rik	3.669	1.339	6.179	0.0001512	0.001872
5330434G04Rik	3.666	-1.099	4.227	0.00213	0.01034
Shisa7	3.657	-0.1681	3.67	0.005003	0.01884
Scn8a	3.653	1.292	3.081	0.01285	0.03754
Tmem196	3.646	-1.035	4.741	0.001007	0.006259
Rab3b	3.644	0.07706	6.425	0.0001124	0.001576
Csf2ra	3.635	4.463	9.229	6.144e-06	0.0004113
Rab15	3.606	1.977	4.488	0.001448	0.007954
Irs4	3.584	-0.4132	3.996	0.003019	0.01315
Nav3	3.573	2.873	6.853	6.836e-05	0.001196
Gm13710	3.567	-0.4497	4.008	0.002963	0.01297
Il16	3.565	2.867	6.342	0.0001241	0.001679
AI607873	3.546	3.582	4.642	0.001159	0.006842
Kif5a	3.544	3.354	3.839	0.003842	0.01563
H2-DMb2	3.54	2.644	3.003	0.01461	0.04129
Slamf1	3.536	-0.5385	4.229	0.002124	0.01032
Gpx3	3.534	4.711	7.325	4.044e-05	0.0009151
Mmel1	3.533	-0.9312	4.807	0.0009172	0.005877
Sirpa	3.532	7.036	16.79	3.424e-08	7.905e-05
Dusp9	3.525	-0.283	4.457	0.001517	0.008187
Aldh1b1	3.524	0.3817	4.403	0.00164	0.008624
Lgmn	3.516	8.71	13.97	1.738e-07	0.0001193
Traf3ip3	3.51	1.767	7.47	3.462e-05	0.000846
Hs3st3b1	3.509	1.373	3.688	0.004864	0.01844
Dock8	3.505	5.1	10.87	1.538e-06	0.0002331
Slc46a1	3.505	2.684	3.924	0.00337	0.01422
Tubb3	3.502	3.435	5.765	0.0002535	0.002571
Hcn1	3.497	0.322	3.678	0.004938	0.01865
Tmem221	3.493	-0.5662	4.217	0.002161	0.01045
Sorcs2	3.489	2.859	5.144	0.000575	0.004276
Ncf2	3.487	4.645	7.379	3.815e-05	0.0008877
Pik3r5	3.484	3.328	5.105	0.0006061	0.004423
Gcnt1	3.48	3.418	7.702	2.71e-05	0.0007494
Ms4a6b	3.476	3.321	5.431	0.0003909	0.00335
Ttbk1	3.472	0.94	5.27	0.0004845	0.003809
Slitrk5	3.467	2.126	4.01	0.002954	0.01296
Kcnk10	3.462	-1.378	3.643	0.005214	0.01946
Gabrb3	3.457	0.05304	3.427	0.007349	0.02494
Pak3	3.452	3.356	6.443	0.00011	0.001556
Gm6377	3.448	0.5918	3.392	0.007776	0.02604
Kif21b	3.447	4.269	10.69	1.78e-06	0.0002433
Cnih3	3.447	-0.7511	4.262	0.002023	0.009975
2900011O08Rik	3.446	2.35	8.329	1.435e-05	0.0005654
Diras1	3.446	0.3835	4.331	0.001824	0.009299
Naaa	3.444	5.108	9.546	4.631e-06	0.0003813
Hcls1	3.443	5.953	13.04	3.184e-07	0.0001314
Tnfrsf11b	3.438	2.963	5.794	0.0002443	0.002507
Batf3	3.435	-0.1535	3.527	0.006269	0.02214
Itgb5	3.428	7.653	9.199	6.312e-06	0.0004121
Lyz2	3.42	5.627	6.076	0.0001717	0.002023
Kcnk13	3.408	2.758	5.857	0.0002256	0.002391
Dgki	3.405	1.36	6.405	0.0001151	0.001597
Nfkbid	3.395	3.261	3.451	0.007068	0.0242
Inhbb	3.393	3.721	5.922	0.0002078	0.002273
Med12l	3.392	1.883	7.635	2.906e-05	0.0007783
Dok2	3.387	0.4536	3.866	0.003684	0.01518
Lacc1	3.386	3.536	8.689	1.014e-05	0.0004823
Vgf	3.382	5.745	6.957	6.073e-05	0.00114
Tle6	3.381	-0.1506	3.916	0.003411	0.01434
Cfi	3.38	3.697	5.847	0.0002285	0.00241
Csf2rb2	3.373	4.873	9.06	7.162e-06	0.0004189
Flt3	3.37	-0.6759	3.865	0.003691	0.0152
Stk32a	3.366	1.251	3.28	0.009307	0.02958
Fam167b	3.365	3.166	5.409	0.0004024	0.003402
Pycard	3.359	4.755	9.469	4.954e-06	0.0003873
Amica1	3.359	2.238	5.052	0.0006523	0.004673
Foxd3	3.358	0.1395	4.185	0.002267	0.01078
Pygl	3.355	3.979	5.879	0.0002193	0.002355
Serpina3n	3.353	4.761	6.486	0.0001046	0.001512
Slamf8	3.348	3.286	5.682	0.000282	0.002772
Scn11a	3.338	-0.8256	3.255	0.009695	0.03047
Tagap	3.332	3.943	4.252	0.002053	0.01007
4933430I17Rik	3.328	-0.004355	3.53	0.00624	0.02208
Rap1gap2	3.326	1.822	7.907	2.192e-05	0.0006755
D5Ertd605e	3.326	0.8491	3.723	0.004603	0.01772
Nyap1	3.324	-0.1639	3.718	0.004637	0.01779
Arl4c	3.32	5.357	6.422	0.0001128	0.00158
Slfn1	3.318	0.2816	3.589	0.005683	0.0207
Pfkfb4	3.301	2.903	7.131	5.004e-05	0.001028
Postn	3.297	4.592	3.207	0.01048	0.03234
Pik3cd	3.296	4.544	11.68	8.316e-07	0.0001853
Pyhin1	3.295	1.496	5.221	0.0005179	0.003976
Clec4a2	3.283	1.208	3.308	0.008893	0.02862
Cd79b	3.276	-0.2293	3.115	0.01215	0.03604
Slc7a7	3.275	5.267	13.13	2.998e-07	0.0001314
C4b	3.273	8.387	9.234	6.117e-06	0.0004113
Rasa4	3.268	3.441	8.49	1.227e-05	0.0005332
Tmem40	3.268	-0.7708	4.84	0.0008756	0.005719
Rab32	3.267	4.338	8.265	1.528e-05	0.0005801
Lrmp	3.264	2.855	6.643	8.696e-05	0.001346
Runx1	3.258	2.943	4.131	0.002459	0.01141
Col7a1	3.255	4.06	5.837	0.0002312	0.002422
Oaf	3.254	4.135	11.68	8.29e-07	0.0001853
Cdh19	3.253	1.367	3.381	0.00791	0.02638
Tfap2a	3.25	0.9694	7.719	2.662e-05	0.0007464
Evi2a	3.249	3.868	6.882	6.61e-05	0.001174
Cd74	3.249	10.11	3.005	0.01454	0.04114
BC037034	3.244	3.405	8.943	7.985e-06	0.0004369
Pla2g2d	3.231	1.065	5.136	0.0005809	0.004304
Spon1	3.23	5.172	9.547	4.626e-06	0.0003813
Tcerg1l	3.227	-0.5577	2.955	0.0158	0.04369
Shisa8	3.225	-0.6043	4.554	0.001316	0.007439
Sh3bp2	3.224	3.418	11.1	1.289e-06	0.0002168
AI414108	3.217	2.852	4.175	0.002301	0.0109
Actr3b	3.204	0.7276	4.775	0.0009593	0.006064
Mafb	3.198	6.236	7.339	3.986e-05	0.0009075
Gpr18	3.195	-1.231	3.296	0.009065	0.02902
Ccl11	3.193	2.58	3.444	0.007147	0.02441
Elavl2	3.189	0.2971	3.241	0.009908	0.031
Mlxip	3.18	2.67	4.83	0.0008883	0.005762
Tmem179	3.18	-0.2761	3.91	0.003446	0.01445
Ucn2	3.18	-0.6524	3.69	0.00485	0.01841
Onecut2	3.177	-0.09663	3.33	0.00859	0.02801
Rnf157	3.172	2.006	3.068	0.01313	0.03819
Klrk1	3.165	1.311	5.221	0.0005181	0.003976
Cotl1	3.163	7.224	11.15	1.236e-06	0.0002107
Slc39a14	3.163	3.632	4.822	0.0008974	0.005798
Tlr1	3.157	3.69	10.38	2.271e-06	0.0002866
Phyhd1	3.149	3.383	6.934	6.234e-05	0.00115
Ccl9	3.147	2.844	4.138	0.002435	0.01135
Acss1	3.146	3.12	7.249	4.395e-05	0.0009631
Rasgef1b	3.141	4.751	4.785	0.0009462	0.006
Syt1	3.139	0.2621	3.702	0.004758	0.01814
1700112E06Rik	3.138	0.3293	3.133	0.01181	0.03527
Rab7b	3.126	3.139	3.94	0.003291	0.01398
Lppr3	3.117	0.9178	4.045	0.0028	0.01253
Atcay	3.109	2.306	6.384	0.0001181	0.001626
Moxd1	3.105	4.605	5.663	0.0002888	0.002814
Fam46c	3.102	4.307	4.048	0.002788	0.0125
Myo7a	3.101	3.678	4.621	0.001196	0.006973
Unc13d	3.092	2.102	5.776	0.00025	0.00255
Slc16a10	3.09	2.167	5.942	0.0002027	0.002245
Amz1	3.088	3.524	9.115	6.811e-06	0.0004172
Slc2a6	3.081	4.389	7.22	4.534e-05	0.0009851
Dcx	3.075	2.091	4.676	0.001105	0.006614
Myo16	3.074	1.812	5.627	0.0003027	0.002891
Prkg2	3.069	1.478	3.089	0.01268	0.03718
Cebpa	3.066	5.058	6.804	7.223e-05	0.001236
Stac2	3.065	0.2158	2.935	0.01631	0.04477
Slc35g1	3.059	0.07622	3.428	0.007337	0.02492
Ptprn2	3.053	-0.7421	3.523	0.006303	0.0222
Dusp26	3.049	2.553	8	1.994e-05	0.000644
Cntn4	3.049	-0.1298	3.275	0.009376	0.02973
Kcnk2	3.045	2.887	3.36	0.008175	0.02701
Slc15a3	3.036	5.781	9.875	3.48e-06	0.0003595
Tro	3.032	1.641	5.364	0.0004274	0.003534
Acp5	3.023	3.636	5.409	0.0004028	0.003402
Gbgt1	3.02	1.106	5.105	0.0006059	0.004423
Pcbd1	3.009	-0.3288	3.301	0.009001	0.02887
Arrb2	3.007	5.139	13.78	1.97e-07	0.0001193
Ebi3	3.007	1.119	4.266	0.002011	0.009932
Igsf21	3.007	0.6514	3.375	0.007984	0.02655
Dok3	3.005	2.599	9.442	5.074e-06	0.0003873
Tgfbi	3.003	5.5	6.074	0.000172	0.002023
Penk	3.001	4.672	3.322	0.008698	0.02827
Wnk3	3	0.01188	3.423	0.007391	0.02503
Tlr2	2.998	6.159	6.42	0.000113	0.00158
Rab3il1	2.997	5.241	10.61	1.885e-06	0.0002525
Gmip	2.997	3.801	8.961	7.849e-06	0.0004369
Elf4	2.995	4.237	9.107	6.861e-06	0.0004172
Itgb3	2.992	4.974	6.881	6.617e-05	0.001174
A630001G21Rik	2.992	1.344	6.665	8.483e-05	0.001324
Gdap1l1	2.989	0.1127	3.452	0.007057	0.02419
Csmd2	2.988	3.01	3.877	0.003622	0.01498
Cxcl16	2.987	5.421	6.89	6.55e-05	0.001174
Eef1a2	2.986	3.337	5.301	0.000465	0.003712
S100a6	2.983	4.818	8.046	1.903e-05	0.0006372
Slc13a3	2.983	2.225	6	0.0001884	0.00215
Gsap	2.982	3.075	7.534	3.234e-05	0.0008241
Apobec1	2.98	4.375	7.342	3.973e-05	0.0009075
Rspo1	2.972	1.64	5.442	0.0003852	0.00333
Ppp1r3b	2.971	2.944	7.353	3.923e-05	0.0009075
Mmp16	2.967	2.236	3.841	0.003833	0.01561
Myt1	2.963	2.396	4.541	0.001342	0.007551
Plcl2	2.962	3.78	7.278	4.256e-05	0.0009466
AI662270	2.96	1.906	4.772	0.000963	0.00607
H2-DMa	2.96	5.512	4.229	0.002123	0.01032
Ptgr1	2.956	2.549	4.807	0.0009172	0.005877
Crmp1	2.955	3.204	7.167	4.81e-05	0.001019
Angptl7	2.952	0.519	3.987	0.003061	0.01329
Slitrk2	2.951	1.113	2.989	0.01493	0.04194
Brinp3	2.939	1.577	4.114	0.002522	0.01162
Lrrtm3	2.935	0.9316	4.166	0.002332	0.01101
Nova1	2.918	4.107	4.782	0.0009497	0.006015
Osbp2	2.918	0.1015	3.456	0.007022	0.02412
Shc4	2.917	1.643	5.373	0.0004223	0.003505
Cdkn2a	2.916	3.299	8.704	9.99e-06	0.0004791
Ang	2.916	0.5639	4.901	0.0008033	0.005392
Rnase4	2.904	5.833	8.971	7.779e-06	0.0004362
Dcc	2.903	0.4985	4.29	0.001939	0.009691
Cdkl1	2.897	0.04085	3.259	0.009625	0.03029
Bex2	2.883	3.142	7.067	5.374e-05	0.001065
Chst1	2.881	5.986	12.08	6.209e-07	0.0001598
Atp8a2	2.881	1.343	4.515	0.001393	0.007749
Pnpla7	2.878	4.482	10.71	1.742e-06	0.0002433
Kcnk6	2.869	4.735	12.56	4.406e-07	0.0001406
Fam26f	2.865	0.5038	2.937	0.01627	0.04468
Dgat2	2.86	2.677	5.12	0.000594	0.004367
Dok1	2.859	3.315	10.48	2.096e-06	0.0002723
Zeb2os	2.854	2.413	5.668	0.0002869	0.002804
Cd83	2.852	6.4	7.164	4.825e-05	0.001019
Myo5a	2.846	5.361	7.338	3.989e-05	0.0009075
Zfpm2	2.846	0.03465	3.38	0.007926	0.0264
Arxes1	2.846	0.3829	3.285	0.009236	0.02944
Cebpb	2.844	5.247	3.688	0.004864	0.01844
Hivep3	2.843	2.908	4.815	0.0009072	0.005836
Nt5e	2.834	1.736	3.457	0.00701	0.02409
6330416G13Rik	2.827	3.913	8.877	8.487e-06	0.0004509
Fam89a	2.823	0.2567	3.427	0.007343	0.02493
Ctsd	2.82	10.82	9.972	3.205e-06	0.0003448
Naip6	2.815	-0.4111	4.763	0.0009764	0.00613
Dlk1	2.813	3.567	3.136	0.01175	0.03519
Bco2	2.81	0.6566	3.297	0.009052	0.029
Rgs7	2.81	0.3061	3.239	0.00994	0.03106
Lsp1	2.805	3.418	4.308	0.001888	0.009514
Hpn	2.791	0.5103	5.066	0.0006398	0.004606
Opcml	2.791	0.7312	2.957	0.01572	0.04355
Cacng5	2.782	3.21	3.77	0.004281	0.01688
Olfm2	2.781	2.353	5.718	0.0002692	0.002674
Erbb3	2.781	1.919	5.14	0.0005778	0.004288
Areg	2.779	0.3846	3.013	0.01437	0.04077
BC026585	2.777	2.592	5.913	0.0002101	0.002289
Dscam	2.777	2.089	5.607	0.0003107	0.002935
Plau	2.777	5.187	3.859	0.003726	0.01531
B3galt5	2.776	3.218	6.67	8.433e-05	0.001322
Arsb	2.774	7.355	10.86	1.545e-06	0.0002331
Ptpn5	2.768	0.4236	3.725	0.004592	0.01768
Etv4	2.766	2.699	8.434	1.295e-05	0.0005412
Usp13	2.764	1.466	2.98	0.01516	0.04244
Naip5	2.763	2.089	8.51	1.203e-05	0.0005323
Zfp536	2.763	2.175	3.251	0.009752	0.03062
Ntpcr	2.762	4.898	9.077	7.055e-06	0.0004189
9330159F19Rik	2.755	1.23	3.661	0.005076	0.01905
Rassf4	2.753	4.592	7.677	2.781e-05	0.0007587
Abcb1b	2.752	2.084	6.021	0.0001836	0.002117
Gnaz	2.752	1.402	4.275	0.001983	0.009831
Bcl11b	2.749	0.5664	4.506	0.001412	0.00782
Soat1	2.747	4.865	9.182	6.408e-06	0.0004121
Fgl2	2.743	5.355	11.25	1.145e-06	0.0002003
Rnf183	2.741	2.352	5.497	0.0003586	0.003202
Gprin1	2.738	1.074	4.334	0.001816	0.00929
Phldb3	2.733	0.1102	3.719	0.004632	0.01779
Col11a1	2.732	2.778	5.774	0.0002505	0.002552
Ikbke	2.727	1.226	4.973	0.0007273	0.005031
Ctsz	2.726	8.6	14.08	1.624e-07	0.0001193
S100a4	2.724	2.425	5.186	0.0005429	0.004113
Angpt2	2.723	8.042	9.134	6.698e-06	0.0004166
Cd63	2.723	7.216	7.987	2.02e-05	0.0006449
Fsd1	2.722	-0.04703	3.188	0.01079	0.03309
Scn1b	2.717	3.987	6.862	6.763e-05	0.001193
Syk	2.714	4.879	7.991	2.011e-05	0.0006449
Ptk2b	2.708	4.509	8.293	1.487e-05	0.0005723
Rnasel	2.702	2.348	4.328	0.001834	0.009323
Nfam1	2.701	5.04	8.508	1.206e-05	0.0005323
Gm4980	2.697	3.206	6.966	6.011e-05	0.001137
Kcnip1	2.697	-0.3274	3.198	0.01063	0.03272
Dna2	2.694	1.809	6.843	6.915e-05	0.001199
Pgbd5	2.687	0.5066	4.832	0.0008859	0.005758
Unc93b1	2.684	6.703	14.86	1.009e-07	0.0001103
Add2	2.678	1.909	5.173	0.0005529	0.004165
Apba2	2.67	3.651	8.116	1.774e-05	0.0006207
Cd44	2.668	3.912	3.484	0.006714	0.02338
Lonrf2	2.668	0.1	3.176	0.01101	0.03359
Erc2	2.666	-0.01901	3.134	0.01178	0.03524
Pcsk6	2.664	3.565	4.888	0.0008181	0.005474
Kcnab2	2.661	3.361	7.332	4.014e-05	0.0009114
Adap1	2.661	3.696	6.242	0.00014	0.001793
Tmem200a	2.654	-0.3219	3.163	0.01125	0.0341
Agpat9	2.651	1.025	3.339	0.008458	0.02768
Ctsb	2.64	10.41	14.32	1.403e-07	0.0001193
Kcng2	2.631	2.542	4.556	0.001313	0.00743
Rasgef1c	2.629	0.3352	4.222	0.002146	0.01039
Pag1	2.628	4.778	9.376	5.384e-06	0.0003895
Espn	2.628	0.1019	4.979	0.0007206	0.004995
Syn1	2.623	1.758	4.073	0.002688	0.01214
Sox2	2.615	4.303	6.77	7.511e-05	0.001269
Prune2	2.611	4.11	6.556	9.626e-05	0.001435
Gmfg	2.601	1.869	5.3	0.0004656	0.003712
Ttc9	2.599	2.204	4.363	0.00174	0.009011
Aldh1a3	2.591	3.546	6.338	0.0001248	0.001681
Pik3cg	2.575	5.092	16.19	4.722e-08	7.905e-05
Slc9a9	2.569	3.262	4.82	0.0009006	0.005811
Nnat	2.568	6.485	7.827	2.379e-05	0.0007003
Dtx4	2.565	5.264	9.684	4.104e-06	0.000378
Slc38a6	2.555	3.358	7.338	3.99e-05	0.0009075
Wnt7b	2.554	2.915	4.244	0.002075	0.01015
Adora1	2.548	3.711	9.21	6.247e-06	0.000412
Ifi202b	2.547	6.026	6.352	0.0001227	0.001667
Stxbp2	2.546	4.438	11.47	9.721e-07	0.0001958
Lgi4	2.536	2.376	6.05	0.0001773	0.002059
Lyve1	2.535	1.214	4.105	0.002559	0.01173
Cd80	2.533	-0.2036	2.942	0.01614	0.04438
Tgm1	2.532	0.1043	3.749	0.004423	0.01726
Gm4961	2.53	-0.744	4.698	0.00107	0.00648
Asphd2	2.528	0.3414	4.044	0.002805	0.01254
Gm5086	2.527	0.9308	4.242	0.002082	0.01017
Sulf2	2.523	5.704	11.05	1.336e-06	0.000222
Ccl5	2.523	2.412	3.217	0.0103	0.03188
Epb4.1l3	2.518	4.348	6.276	0.0001344	0.001756
Rgs2	2.518	5.784	4.692	0.00108	0.006518
3830403N18Rik	2.517	1.348	3.933	0.003327	0.01408
Pcdh15	2.511	1.359	3.473	0.006831	0.02365
Naip2	2.504	5.108	16.16	4.819e-08	7.905e-05
Cmtm7	2.5	4.142	6.939	6.199e-05	0.001149
Syngr3	2.498	0.5936	4.078	0.002667	0.01211
Slc41a2	2.496	1.377	4.135	0.002445	0.01138
Relt	2.492	1.01	4.544	0.001337	0.007535
Cspg5	2.49	3.933	5.36	0.0004296	0.003543
Nalcn	2.489	1.831	5.798	0.000243	0.002501
Hapln4	2.487	-0.5923	2.92	0.01673	0.04556
9330151L19Rik	2.485	-0.2164	2.906	0.0171	0.04624
Gda	2.477	3.809	6.121	0.0001624	0.001959
Enox1	2.477	0.03368	3.726	0.004582	0.01767
Fgd3	2.476	3.01	5.642	0.0002969	0.002857
Rgs17	2.474	2.489	3.383	0.007885	0.02633
Soga3	2.47	2.922	3.504	0.006505	0.02281
Sept3	2.465	2.776	4.551	0.001322	0.007467
Disp2	2.463	2.41	4.632	0.001177	0.006907
Lgals1	2.462	6.355	8.395	1.345e-05	0.0005517
Usp35	2.46	2.588	6.704	8.106e-05	0.0013
Hrh1	2.46	-0.5784	3.846	0.003804	0.01553
Sema4a	2.459	1.837	3.526	0.006278	0.02215
Ptpro	2.454	3.387	5.371	0.0004232	0.003507
Taf1d	2.454	5.407	4.641	0.001161	0.006844
Cdh24	2.449	-0.1735	4.384	0.001687	0.008816
Zmynd15	2.449	1.271	4.102	0.002569	0.01176
Egr2	2.449	2.983	3	0.01468	0.04142
Ptprz1	2.441	5.482	4.791	0.0009378	0.005975
Guca1a	2.44	0.02497	4.951	0.00075	0.005137
Grik3	2.438	2.925	5.443	0.0003848	0.00333
Ubash3b	2.434	3.888	8.057	1.882e-05	0.0006348
Neto1	2.434	0.3543	3.381	0.00791	0.02638
Pla2g15	2.433	5.991	9.453	5.025e-06	0.0003873
Cers6	2.423	2.021	3.995	0.003023	0.01316
Snx22	2.421	0.6482	5.273	0.0004825	0.003801
Zfp488	2.421	0.8084	4.288	0.001945	0.00971
Bcat1	2.417	3.741	6.489	0.0001042	0.001512
Fam46a	2.414	4.044	5.299	0.0004659	0.003712
Col4a3	2.413	4.345	3.27	0.00946	0.02991
Gria2	2.413	3.801	2.979	0.01519	0.0425
Sox10	2.408	4.98	7.146	4.919e-05	0.001028
Nkx2-2	2.407	2.281	4.435	0.001567	0.008365
Chga	2.393	0.258	3.627	0.005349	0.01982
Espl1	2.391	3.262	5.361	0.0004294	0.003543
Bfsp2	2.391	0.9417	3.823	0.003939	0.0159
Zfp710	2.389	4.165	6.467	0.000107	0.001534
Rgs14	2.388	0.3395	4.388	0.001678	0.008778
Vipr1	2.388	0.1271	3.196	0.01066	0.03277
Gm867	2.38	-0.3544	2.953	0.01585	0.04381
Tubb2b	2.378	6.165	6.723	7.926e-05	0.0013
Rbm47	2.371	1.92	3.1	0.01246	0.03673
Zfp385a	2.37	4.847	7.26	4.344e-05	0.0009598
Tmem86a	2.369	5.59	10.69	1.773e-06	0.0002433
Arhgdig	2.365	-0.3117	3.631	0.00532	0.01975
Clca3a1	2.357	0.9033	3.585	0.005714	0.02078
Scgb3a1	2.353	5.695	8.738	9.67e-06	0.0004775
Qpct	2.353	3.741	5.416	0.0003988	0.003384
Ina	2.349	-0.2648	2.916	0.01683	0.04573
Slc16a6	2.345	5.305	9.601	4.411e-06	0.0003813
Gng10	2.345	5.672	8.703	1e-05	0.0004791
Elfn2	2.34	2.106	6.22	0.0001439	0.001822
Cacng4	2.337	0.9229	3.605	0.00554	0.02032
Unc79	2.332	0.4511	4.037	0.002839	0.01264
Igsf8	2.33	6.02	13.79	1.949e-07	0.0001193
Arap1	2.33	5.514	9.296	5.782e-06	0.0004067
Socs3	2.33	6.812	3.311	0.008849	0.02856
Nme4	2.327	1.1	3.456	0.00702	0.02411
Sdk2	2.324	1.665	2.895	0.01742	0.04691
Abi3	2.32	5.6	16.67	3.646e-08	7.905e-05
Cyth4	2.31	6.695	13.66	2.114e-07	0.0001193
Meis3	2.309	2.635	8.026	1.942e-05	0.0006388
Pon3	2.309	4.407	6.524	0.0001	0.001473
Fabp5	2.309	4.743	4.575	0.001278	0.007279
Pstpip1	2.309	0.3861	3.408	0.007571	0.02551
Ltc4s	2.297	4.068	4.352	0.001769	0.009124
Camk2a	2.294	1.055	3.762	0.00433	0.01703
Adam19	2.288	2.769	5.346	0.0004375	0.00358
Zfp575	2.288	-0.5957	3.893	0.003537	0.01473
Kif5c	2.285	3.033	5.539	0.0003394	0.003084
Celf5	2.281	-0.03365	3.771	0.004271	0.01685
Pdgfra	2.279	6.977	4.258	0.002033	0.01001
Brinp1	2.279	0.9914	3.148	0.01152	0.03469
Plxdc2	2.276	6.18	7.009	5.731e-05	0.001111
Axl	2.275	8.191	7.87	2.277e-05	0.0006878
Rundc3a	2.27	3.439	8.151	1.713e-05	0.0006141
Plxnc1	2.27	2.271	4.817	0.0009048	0.005826
Ptpn18	2.268	3.632	5.949	0.0002009	0.002228
Il17ra	2.266	5.001	7.169	4.797e-05	0.001019
Foxred2	2.266	0.8099	3.899	0.003502	0.01464
Camk2b	2.265	2.024	5.19	0.0005402	0.004098
Slc38a1	2.264	4.584	6.282	0.0001335	0.001754
Pgf	2.262	4.851	4.576	0.001276	0.007279
Gsto1	2.261	5.103	10.86	1.544e-06	0.0002331
Efhd2	2.26	7.136	12.95	3.389e-07	0.0001317
Man2b1	2.258	7.953	9.637	4.274e-06	0.0003813
Xylt1	2.258	1.71	3.694	0.004821	0.01833
Lrp1	2.251	7.868	6.08	0.0001708	0.002021
Fam124a	2.247	1.406	3.345	0.008386	0.02753
Orai2	2.246	3.381	8.302	1.474e-05	0.0005723
Sptbn2	2.245	4.699	5.172	0.0005532	0.004165
Ccrl2	2.245	6.585	4.657	0.001135	0.006727
Trp53i11	2.24	8.096	8.119	1.768e-05	0.0006202
Adcy3	2.233	4.297	9.453	5.026e-06	0.0003873
Lppr5	2.233	0.984	4.178	0.002293	0.01087
Rmi2	2.231	1.226	4.682	0.001095	0.00658
BC005561	2.222	5.375	3.311	0.008847	0.02856
3110035E14Rik	2.22	4.056	4.328	0.001833	0.009323
Cdh13	2.218	4.748	6.405	0.0001151	0.001597
Daglb	2.214	4.418	7.873	2.269e-05	0.0006877
C1rl	2.214	1.594	4.479	0.001468	0.008016
Nox4	2.213	5.316	5.756	0.0002565	0.002588
Dkk2	2.208	5.593	7.249	4.396e-05	0.0009631
Sema3e	2.203	1.276	3.586	0.00571	0.02077
Gm2a	2.2	7.46	8.95	7.931e-06	0.0004369
Marcksl1	2.199	6.264	6.452	0.0001089	0.001548
Gm8615	2.197	2.799	7.297	4.171e-05	0.0009373
Rapsn	2.194	0.8403	3.938	0.003299	0.01399
Aldh1l2	2.194	2.626	3.925	0.003365	0.0142
Nptx1	2.192	2.634	4.133	0.002453	0.0114
Ninl	2.188	1.347	4.208	0.00219	0.01055
Ttc9b	2.188	-0.2237	3.8	0.004083	0.01632
Mmp2	2.183	4.31	5.615	0.0003072	0.002918
Syce2	2.182	0.8523	3.225	0.01017	0.03158
Ctsc	2.178	8.048	13.62	2.172e-07	0.0001193
Fam49b	2.176	6.882	13.03	3.204e-07	0.0001314
Cds1	2.175	2.323	3.183	0.01089	0.03331
Bean1	2.167	0.5172	3.772	0.004265	0.01684
Ank3	2.166	4.647	3.406	0.007604	0.02557
Slc29a3	2.163	6.299	12.94	3.413e-07	0.0001317
Grik4	2.162	1.761	3.836	0.003859	0.01567
Irf5	2.161	5.013	8.813	9.012e-06	0.0004656
Apln	2.16	9.508	7.454	3.521e-05	0.0008529
Sema4d	2.159	4.342	6.287	0.0001327	0.00175
Dapp1	2.156	3.258	3.891	0.003548	0.01476
Ncan	2.156	4.176	3.297	0.009056	0.02901
Shc2	2.154	0.5388	3.621	0.005406	0.01998
Lhfpl4	2.151	1.917	6.074	0.000172	0.002023
B4galnt4	2.148	0.5132	3.576	0.005797	0.02098
Bin1	2.145	6.621	8.18	1.663e-05	0.0006083
Abhd12	2.136	7.168	8.177	1.669e-05	0.0006083
Cmklr1	2.135	6.134	12.11	6.078e-07	0.0001598
St8sia1	2.135	1.258	3.729	0.004557	0.01762
Galns	2.133	4.693	12.1	6.111e-07	0.0001598
Ppap2c	2.132	3.206	6.63	8.828e-05	0.001357
Lrrc4	2.131	1.977	5.106	0.0006052	0.004423
Slc2a3	2.129	2.418	4.528	0.001367	0.00765
Il4ra	2.128	6.568	8.871	8.535e-06	0.0004514
Ttc7	2.128	4.307	7.118	5.074e-05	0.001037
Iglon5	2.127	1.817	4.061	0.002737	0.0123
Clip4	2.125	1.263	3.128	0.01191	0.0355
Tmem121	2.12	-0.5713	2.958	0.0157	0.04351
Ctxn1	2.117	2.99	7.681	2.768e-05	0.0007569
Tha1	2.112	1.044	5.049	0.0006542	0.004678
Marcks	2.108	7.302	7.215	4.559e-05	0.0009857
Cdk18	2.107	2.598	4.917	0.0007858	0.005316
Dnph1	2.105	0.6152	4.073	0.002687	0.01214
Meis2	2.101	2.071	4.205	0.002201	0.01059
Prokr1	2.098	0.4455	2.869	0.01819	0.04845
Trim9	2.095	3.992	5.247	0.0005002	0.003898
Cd69	2.094	1.992	3.139	0.01169	0.03507
Lmtk3	2.092	1.47	6.195	0.0001483	0.001861
Cd276	2.09	5.05	6.6	9.15e-05	0.001395
Chd7	2.089	6.546	5.407	0.0004037	0.003407
H2-DMb1	2.084	4.877	3.093	0.0126	0.03703
Grn	2.079	9.402	12.87	3.568e-07	0.0001332
Mmp14	2.079	5.399	6.256	0.0001376	0.001781
P2rx7	2.075	5.016	12.79	3.765e-07	0.0001332
Pou3f1	2.072	3.573	5.201	0.000532	0.004052
Pecr	2.07	2.606	3.942	0.003278	0.01394
Tvp23a	2.068	2.918	4.629	0.001181	0.006923
Dab1	2.067	1.055	3.166	0.01119	0.03395
Scamp5	2.065	4.699	6.038	0.0001798	0.002084
Stx1b	2.065	0.9914	4.017	0.002926	0.01289
Xlr	2.064	3.556	6.586	9.294e-05	0.001405
Plxnb2	2.064	7.555	6.464	0.0001073	0.001537
Mif	2.063	5.768	10.29	2.451e-06	0.0002986
Car13	2.063	3.219	5.578	0.0003227	0.003009
Abhd15	2.062	2.903	7.66	2.829e-05	0.0007657
Cdk5r1	2.062	2.585	3.563	0.005917	0.02128
Plxna4os1	2.055	0.6366	3.468	0.006882	0.0238
Mapk8ip2	2.048	1.965	4.343	0.001793	0.009202
Tmem173	2.045	6.216	9.468	4.957e-06	0.0003873
Pantr1	2.043	1.2	4.116	0.002516	0.0116
Sgpl1	2.04	6.447	11.5	9.469e-07	0.0001958
Astn2	2.037	3.001	6.323	0.000127	0.0017
Sorcs3	2.031	-0.1207	2.895	0.01744	0.04694
Camkk1	2.029	2.189	4.96	0.0007402	0.005083
Lcp1	2.021	8.145	11.51	9.392e-07	0.0001958
Ppp1r9a	2.02	2.878	3.883	0.00359	0.01487
Bcas1	2.019	5.58	6.474	0.0001061	0.001523
Enpp1	2.016	4.093	5.267	0.0004868	0.003819
Cxcl14	2.015	3.132	5.243	0.0005023	0.003905
Fam49a	2.013	3.434	5.582	0.0003209	0.003003
Fam78b	2.011	1.227	2.869	0.01819	0.04845
Sh3gl3	2.005	2.806	6.48	0.0001053	0.001514
Klrg2	2.002	2.094	5.654	0.0002924	0.002834
Tanc2	1.999	5.225	11.27	1.128e-06	0.0002003
Trpv2	1.992	4.335	5.057	0.0006479	0.004653
P2ry2	1.987	2.858	5.667	0.0002873	0.002805
Chadl	1.984	2.28	5.815	0.0002378	0.002467
Zfp239	1.983	0.3528	4.308	0.001889	0.009515
Kcnq2	1.983	-0.2152	4.053	0.002769	0.01244
Cenpi	1.982	1.72	3.971	0.003137	0.01354
Inpp5d	1.978	7.157	12.31	5.257e-07	0.0001468
Pidd1	1.978	0.02135	3.745	0.004446	0.01733
Rab39b	1.976	1.96	4.757	0.0009837	0.006156
Plekho2	1.975	6.161	4.639	0.001166	0.006862
Rcor2	1.974	1.196	5.186	0.0005428	0.004113
Elavl3	1.969	4.652	3.362	0.008159	0.02697
Gadd45g	1.967	4.002	4.829	0.0008896	0.005765
Tgfbr1	1.966	6.578	7.95	2.098e-05	0.0006666
Adssl1	1.965	3.019	3.356	0.008241	0.02716
Acvr1b	1.96	2.201	4.45	0.001532	0.008234
Pctp	1.959	2.018	5.731	0.0002648	0.002645
Tep1	1.956	5.15	9.668	4.161e-06	0.000378
Ctsa	1.955	8.44	11.42	1.004e-06	0.0001966
Fblim1	1.948	4.142	8.73	9.747e-06	0.0004775
AI504432	1.937	1.679	3.452	0.007065	0.0242
Tmem106a	1.936	4.173	5.465	0.0003737	0.003269
Mest	1.935	4.892	2.945	0.01606	0.04422
Nrros	1.932	5.792	9.993	3.148e-06	0.0003418
Ccdc106	1.931	0.6228	4.495	0.001435	0.007904
Gm11974	1.931	0.2446	3.721	0.004619	0.01775
Ache	1.93	-0.2547	3.103	0.0124	0.03659
Mex3a	1.929	3.788	5.639	0.0002981	0.002864
Malat1	1.929	10.98	4.77	0.000967	0.006083
Dnm1	1.925	2.379	4.657	0.001135	0.006727
Arhgap15	1.917	1.79	3.959	0.003197	0.0137
Rnf165	1.915	1.764	3.392	0.007771	0.02603
Cfap74	1.91	0.2522	2.916	0.01684	0.04573
Abca9	1.909	4.718	3.051	0.01349	0.03895
Tenm3	1.905	2.838	3.169	0.01114	0.03385
Sowahc	1.904	5.211	3.25	0.009768	0.03065
Cxcr4	1.898	5.803	3.941	0.003282	0.01395
Slc24a1	1.898	0.6541	3.208	0.01045	0.03228
Upp1	1.895	3.893	3.19	0.01077	0.03304
Tub	1.889	3.192	5.677	0.0002836	0.00278
Ticrr	1.889	1.432	4.497	0.00143	0.007885
Kif2c	1.888	3.435	5.901	0.0002133	0.002308
Dock11	1.888	3.919	4.159	0.00236	0.01111
Prkcd	1.887	5.527	8.258	1.539e-05	0.0005802
Etv5	1.883	4.24	6.201	0.0001471	0.00185
Bex1	1.882	2.221	5.037	0.0006657	0.004725
Arhgdib	1.881	6.955	9.089	6.979e-06	0.0004189
Pcdh7	1.881	5.026	4.93	0.0007721	0.005239
Igf2bp2	1.881	2.698	3.824	0.003937	0.0159
Arhgap33	1.876	1.702	4.047	0.002795	0.01252
Plekho1	1.869	5.616	10.33	2.372e-06	0.0002937
Hps4	1.863	4.468	10.81	1.609e-06	0.00024
Clstn3	1.861	0.9622	3.062	0.01325	0.03842
Slfn8	1.86	4.541	6.144	0.0001578	0.001922
Lrp12	1.859	3.481	8.609	1.094e-05	0.0005071
Glis3	1.859	2.031	4.216	0.002166	0.01047
Ifi204	1.857	5.23	4.613	0.001209	0.007026
Thy1	1.854	4.286	3.528	0.00626	0.02212
Plac8	1.852	3.719	3.376	0.007973	0.02652
Stambpl1	1.851	2.877	6.078	0.0001712	0.002022
Sdf2l1	1.849	4.919	5.911	0.0002107	0.002291
Spred3	1.844	3.094	5.551	0.0003341	0.003058
Dpp6	1.844	3.299	4.487	0.001451	0.007954
Eps8	1.84	5.445	8.761	9.468e-06	0.0004775
Lamb1	1.837	8.277	6.218	0.0001442	0.001823
Aim2	1.834	4.432	7.581	3.076e-05	0.0008074
Stmn3	1.833	2.712	5.425	0.0003941	0.003363
B4galt6	1.832	4.181	3.559	0.00596	0.02137
Gng2	1.829	5.386	6.586	9.302e-05	0.001405
Wasf1	1.828	2.601	4.879	0.0008288	0.005515
Adamts7	1.827	1.104	3.638	0.005257	0.01957
Chrna4	1.825	1.099	3.173	0.01107	0.03372
Smim3	1.821	3.787	6.566	9.514e-05	0.001429
Ddx25	1.821	1.311	5.216	0.000521	0.003989
Usp2	1.82	3.584	4.671	0.001112	0.006645
Tmem35	1.819	1.976	4.11	0.002541	0.01168
Soat2	1.819	0.3015	3.426	0.007364	0.02497
Npc2	1.816	8.569	8.688	1.014e-05	0.0004823
Gpd1	1.809	3.944	5.795	0.0002441	0.002507
Cmip	1.808	6.158	11.97	6.693e-07	0.0001657
Casp1	1.807	4.344	3.939	0.003295	0.01398
Ptpre	1.806	4.535	7.247	4.406e-05	0.0009637
Pqlc2	1.803	2.936	5.402	0.0004063	0.003423
1500009C09Rik	1.801	2.148	4.744	0.001002	0.006238
Tbc1d31	1.801	2.2	4.035	0.002847	0.01266
Cd109	1.8	2.733	3.258	0.009641	0.03033
Cyfip2	1.799	5.25	5.675	0.0002843	0.002783
Sec14l2	1.798	3.239	6.174	0.0001521	0.001881
1700017B05Rik	1.792	5.068	3.531	0.006229	0.02206
Chst10	1.789	2.011	5.267	0.0004867	0.003819
Rec114	1.789	0.07254	3.669	0.005011	0.01886
Tns3	1.788	6.516	9.233	6.122e-06	0.0004113
C1qtnf1	1.788	5.317	6.784	7.397e-05	0.001257
Ntrk3	1.785	2.75	3.107	0.01231	0.0364
Timp2	1.783	7.977	6.765	7.552e-05	0.001272
Ggt7	1.782	1.822	4.031	0.002863	0.0127
Galnt6	1.778	3.266	3.356	0.008235	0.02715
Elfn1	1.776	1.858	3.034	0.01388	0.03979
Anks1b	1.774	3.354	4.419	0.001604	0.008494
Sh3kbp1	1.773	5.666	6.796	7.291e-05	0.001244
Cdca2	1.773	2.822	5.363	0.0004279	0.003536
Agap2	1.771	2.763	4.46	0.00151	0.008159
Pyroxd2	1.761	1.551	3.158	0.01134	0.03427
Faxc	1.755	2.242	4.231	0.002118	0.01031
Zfhx3	1.754	4.107	5.663	0.0002888	0.002814
Bcan	1.753	4.983	4.844	0.0008711	0.005698
Bend6	1.752	1.685	4.732	0.00102	0.006304
Dpp7	1.743	4.665	6.378	0.0001189	0.001632
Apoe	1.742	9.866	7.026	5.624e-05	0.0011
D030028A08Rik	1.741	2.231	5.682	0.000282	0.002772
Fam78a	1.738	2.894	5.98	0.0001933	0.002184
Ephb2	1.737	2.342	3.423	0.007395	0.02503
1110038B12Rik	1.735	2.935	4.049	0.002787	0.0125
Ica1l	1.734	3.695	4.086	0.002632	0.01199
Snhg4	1.733	1.122	4.487	0.001452	0.007954
Celf2	1.729	5.437	7.852	2.319e-05	0.000698
Chst12	1.725	4.083	7.104	5.157e-05	0.001044
Snx10	1.724	5.103	5.518	0.0003486	0.003155
Gapdh	1.722	8.088	8.806	9.069e-06	0.0004667
Rap1gap	1.722	2.227	4.339	0.001804	0.009253
Cdc25c	1.713	1.727	3.702	0.004754	0.01813
Ydjc	1.712	1.289	3.953	0.003223	0.01378
Efs	1.712	1.872	3.307	0.008902	0.02864
Plcg2	1.71	6.295	7.489	3.393e-05	0.0008438
Gpsm3	1.71	4.695	6.935	6.23e-05	0.00115
Arhgef26	1.71	2.819	4.111	0.002537	0.01167
Slc41a3	1.709	2.352	4.822	0.0008981	0.005798
Cenph	1.708	1.001	3.58	0.005763	0.0209
Gtse1	1.704	2.67	3.973	0.003128	0.01351
Cryl1	1.702	3.41	5.198	0.0005345	0.004066
Gpr162	1.702	2.143	3.321	0.008707	0.02828
Ppp1r1a	1.701	1.512	3.539	0.006153	0.02187
Dner	1.7	2.842	5.16	0.0005623	0.004212
Olig2	1.699	4.612	4.526	0.001372	0.007666
Col5a3	1.694	4.973	2.92	0.01671	0.04552
Asf1b	1.693	2.696	4.75	0.0009944	0.006208
Mapt	1.692	4.892	5.556	0.0003319	0.003051
Nell2	1.691	1.635	4.499	0.001426	0.007876
Vav2	1.687	4.506	7.62	2.952e-05	0.0007889
Zfand4	1.687	0.7844	3.931	0.003336	0.0141
Phf11a	1.684	0.9828	3.022	0.01416	0.04029
Sat1	1.681	7.3	6.892	6.535e-05	0.001174
Kifc5b	1.68	1.034	4.228	0.002127	0.01033
Dlgap1	1.68	2.959	4.081	0.002652	0.01205
Igf2bp3	1.68	2.22	3.1	0.01246	0.03673
Emp3	1.675	4.971	6.145	0.0001575	0.001921
Sept1	1.675	4.153	4.595	0.001241	0.007152
Lingo1	1.674	1.236	4.044	0.002809	0.01255
Negr1	1.672	2.472	3.759	0.004353	0.01709
Edem1	1.671	6.436	7.136	4.973e-05	0.001028
Kcnmb4	1.671	0.001853	2.899	0.01732	0.04669
Nr2f1	1.671	3.911	2.961	0.01564	0.04339
Gatm	1.669	9.335	7.406	3.708e-05	0.0008724
Gpc1	1.669	4.45	4.711	0.001051	0.006411
Matn4	1.665	2.748	4.671	0.001113	0.006649
Nradd	1.665	2.03	3.801	0.004077	0.01631
Bmp2k	1.654	5.48	7.578	3.086e-05	0.0008074
Dbn1	1.653	5.05	6.585	9.306e-05	0.001405
Litaf	1.653	7.848	4.771	0.0009648	0.006078
Pdlim1	1.651	4.479	4.471	0.001486	0.00807
Xylb	1.647	0.9081	4.926	0.0007758	0.005259
Gins2	1.644	2.605	4.388	0.001676	0.008772
Ada	1.644	2.844	3.663	0.005058	0.019
Mcm10	1.644	2.431	3.454	0.007041	0.02415
Zcwpw1	1.639	2.337	3.089	0.01267	0.03718
Dnase2a	1.637	4.61	6.192	0.0001488	0.001862
Polq	1.635	1.081	3.243	0.009875	0.03091
Emilin1	1.631	5.374	10.46	2.133e-06	0.0002733
9030617O03Rik	1.63	3.282	4.809	0.000915	0.00587
Slc8a1	1.627	4.816	6.283	0.0001333	0.001754
Fkbp5	1.623	5.275	5.65	0.0002939	0.002846
Pgd	1.619	7.105	16.25	4.569e-08	7.905e-05
Rasal1	1.618	1.02	3.474	0.006817	0.02361
Ccne1	1.616	2.035	2.955	0.01579	0.04368
Nlgn3	1.615	2.725	2.93	0.01644	0.04497
Ripk3	1.613	1.998	3.056	0.01338	0.03869
Camk1d	1.612	4.307	5.922	0.0002078	0.002273
Pdzd4	1.612	2.325	4.456	0.001518	0.00819
Ten1	1.612	2.873	4.477	0.001473	0.008032
Lnx1	1.612	0.02497	2.883	0.01777	0.04763
Lrrc4b	1.611	3.02	4.18	0.002286	0.01085
Jakmip2	1.611	1.724	2.91	0.017	0.04604
Hmmr	1.61	4.116	5.016	0.0006854	0.004823
Serpine1	1.61	7.171	3.401	0.007667	0.02576
Dusp2	1.605	5.652	3.323	0.008676	0.02822
Pak1	1.604	5.195	6.888	6.569e-05	0.001174
Piezo2	1.603	2.979	3.762	0.004333	0.01703
Slc37a1	1.6	3.07	4.984	0.0007158	0.004976
Slc2a9	1.595	3.838	5.484	0.0003647	0.003238
Dennd4b	1.594	3.779	7.113	5.105e-05	0.001039
Timp1	1.594	3.765	5.644	0.0002959	0.002853
Dlgap5	1.593	2.978	5.509	0.0003527	0.003175
Bmp1	1.593	5.879	5.615	0.0003075	0.002918
Unc13a	1.59	1.219	3.074	0.01301	0.03791
Mlec	1.589	6.873	8.462	1.26e-05	0.0005335
Olig1	1.583	6.088	4.427	0.001584	0.00842
Pdxp	1.581	1.333	3.975	0.003116	0.01347
Eif4ebp1	1.58	4.55	8.016	1.961e-05	0.0006417
Celf4	1.58	2.695	3.269	0.009474	0.02994
Tlr4	1.576	5.016	7.94	2.118e-05	0.0006681
Gm16845	1.575	0.09186	3.311	0.008856	0.02858
Dos	1.574	2.221	5.501	0.0003564	0.003201
Arhgap39	1.572	3.74	5.933	0.000205	0.002255
Srek1	1.571	6.215	3.784	0.004185	0.01664
Hexa	1.57	7.036	7.372	3.843e-05	0.0008927
Fam195a	1.569	1.77	3.45	0.007083	0.02423
Cd9	1.567	6.83	8.126	1.755e-05	0.0006175
Trf	1.567	9.173	6.454	0.0001086	0.001548
Snx5	1.566	7.638	9.227	6.155e-06	0.0004113
Zcchc18	1.565	1.837	3.43	0.00731	0.02485
Baz1a	1.561	5.696	4.679	0.001099	0.006592
Fbxl16	1.552	1.477	3.161	0.01127	0.03414
Slc1a5	1.551	4.163	9.052	7.221e-06	0.0004189
Loxl3	1.551	3.146	3.347	0.008356	0.02745
Cenpw	1.549	0.7678	3.864	0.0037	0.01523
Myo9b	1.546	6.381	15.16	8.464e-08	0.000101
Rasa3	1.545	5.734	7.153	4.881e-05	0.001024
Cdca3	1.545	2.723	3.605	0.005537	0.02032
Ablim3	1.545	2.029	3.033	0.0139	0.0398
Adm	1.545	5.454	3.335	0.008511	0.02783
Kdelr3	1.544	3.388	5.33	0.0004475	0.003625
Antxr2	1.544	4.774	3.543	0.006107	0.02175
Tk1	1.544	3.331	2.995	0.0148	0.04165
Orc1	1.541	0.8649	3.424	0.007383	0.02502
Map4k1	1.54	1.79	3.22	0.01026	0.03178
Rap2b	1.539	5.332	7.591	3.044e-05	0.0008039
Fbp1	1.539	3.528	3.737	0.004504	0.01751
Pole	1.536	3.082	3.678	0.004943	0.01865
Mis18bp1	1.535	2.629	4.293	0.00193	0.009663
Ftl1	1.534	9.673	5.594	0.0003158	0.002967
Srpx2	1.533	1.692	3.186	0.01083	0.03319
Ccnf	1.531	2.654	4.334	0.001817	0.009291
Psap	1.53	10.75	7.73	2.631e-05	0.0007425
Arhgap11a	1.527	4.037	5.411	0.0004018	0.003399
Dse	1.525	2.827	3.956	0.003209	0.01374
Col27a1	1.524	3.017	4.108	0.002545	0.01169
Phf11b	1.521	4.393	3.919	0.003397	0.01429
Gm1943	1.521	1.479	3.181	0.01091	0.03337
Pou3f3	1.52	2.332	4.158	0.002364	0.01111
Mnda	1.52	2.756	3.496	0.006583	0.02301
Blm	1.519	2.447	4.266	0.002009	0.00993
Nmral1	1.517	2.759	5.388	0.0004138	0.003461
Bcl7a	1.515	1.679	4.184	0.00227	0.01079
Adamts4	1.514	5.008	3.077	0.01293	0.03773
Dlg4	1.513	3.353	5.289	0.0004722	0.003735
Creg1	1.512	6.26	7.429	3.614e-05	0.0008624
Spata13	1.511	6.264	7.13	5.011e-05	0.001028
Gngt2	1.511	5.009	5.345	0.0004382	0.003581
Ctnna2	1.51	2.624	5.06	0.0006449	0.004635
Uchl1	1.508	4.948	6.483	0.0001049	0.001513
Rps6ka1	1.507	7.154	8.539	1.17e-05	0.0005241
Nln	1.506	3.862	6.023	0.0001833	0.002116
Hdac9	1.506	3.568	5.336	0.0004438	0.003613
Cyp27a1	1.505	1.199	4.009	0.002962	0.01297
Prr11	1.504	3.551	3.608	0.005512	0.02027
S100b	1.503	4.605	4.637	0.001168	0.00687
Gm8909	1.503	4.845	4.33	0.001828	0.00931
Mb21d1	1.497	3.132	5.292	0.0004703	0.003726
Atp13a2	1.495	7.035	11.9	7.044e-07	0.0001712
Trib3	1.493	3.123	4.668	0.001118	0.006666
Scml4	1.492	1.539	3.087	0.01273	0.03725
Pkp2	1.49	2.851	3.523	0.006311	0.02223
Gusb	1.489	7.37	10.27	2.5e-06	0.000301
Mdfi	1.489	3.091	6.519	0.0001006	0.001478
Uap1l1	1.487	4.589	7.097	5.196e-05	0.001048
Tsku	1.484	2.521	4.497	0.001431	0.007885
Asph	1.481	5.616	6.896	6.505e-05	0.001174
Sox6	1.481	3.582	4.479	0.001469	0.008016
Creb3l1	1.48	3.003	5.952	0.0002001	0.002222
Ackr2	1.479	5.74	4.633	0.001175	0.006903
Osgin1	1.479	4.035	3.725	0.004593	0.01768
Rtn1	1.473	4.441	4.231	0.002118	0.01031
Dock10	1.472	5.048	4.841	0.0008739	0.005711
Gins1	1.472	1.697	3.782	0.004199	0.01668
Ank1	1.472	0.0638	2.96	0.01567	0.04345
Kcnq4	1.472	2.444	2.957	0.01573	0.04355
Rims2	1.471	1.264	3.034	0.01388	0.03979
Acer3	1.47	4.831	6.845	6.897e-05	0.001199
Fam217b	1.469	3.186	6.463	0.0001074	0.001537
Fam65b	1.469	2.185	4.653	0.001142	0.006753
Adamts8	1.468	4.534	3.85	0.003778	0.01547
Luc7l3	1.466	7.891	4.07	0.002698	0.01217
Renbp	1.463	5.194	9.286	5.832e-06	0.0004067
Mfap3l	1.463	4.162	4.42	0.001601	0.008485
Plxnb3	1.463	3.779	4.238	0.002097	0.01023
Frzb	1.46	3.2	4.72	0.001037	0.006356
Dtx1	1.459	2.223	3.536	0.006182	0.02193
Stil	1.457	1.944	4.694	0.001077	0.00651
Nxt2	1.457	4.707	4.39	0.001674	0.008765
Fam134b	1.456	5.584	8.98	7.713e-06	0.0004362
Pafah1b3	1.456	2.603	5.246	0.0005006	0.003898
Slc25a13	1.454	2.794	4.365	0.001734	0.008997
Ap3b2	1.452	2.16	4.009	0.002958	0.01297
Sfxn2	1.452	1.876	3.46	0.006974	0.02405
St14	1.444	3.872	7.494	3.375e-05	0.0008438
Aldh3b1	1.444	3.175	6.274	0.0001347	0.001757
Bri3bp	1.444	3.765	5.458	0.0003775	0.003292
Phlda3	1.444	3.967	4.628	0.001183	0.00693
Gareml	1.443	2.301	4.403	0.00164	0.008624
Arhgap24	1.441	2.853	4.721	0.001036	0.006356
Naglu	1.438	5.698	8.466	1.256e-05	0.0005335
Fmn2	1.436	1.648	3.11	0.01225	0.03625
Snx30	1.434	3.591	4.714	0.001047	0.006401
Cib2	1.433	1.204	3.015	0.01431	0.04065
Foxd2os	1.431	0.4575	2.873	0.01806	0.04818
Loxl2	1.43	4.87	3.573	0.005829	0.02105
Pgk1	1.429	6.472	6.819	7.101e-05	0.001222
Rac3	1.429	0.2342	3.052	0.01348	0.03893
Trpc4	1.427	2.499	3.921	0.003386	0.01427
Kcnip3	1.423	3.412	3.494	0.006604	0.02305
Ctsl	1.419	9.028	9.992	3.151e-06	0.0003418
Mgat4a	1.418	5.924	8.298	1.48e-05	0.0005723
Tnik	1.418	4.204	6.867	6.726e-05	0.001189
Sh3pxd2b	1.418	4.938	4.676	0.001104	0.006612
Rinl	1.416	4.544	6.352	0.0001227	0.001667
Rab27a	1.413	4.457	5.299	0.0004659	0.003712
Epb4.1l4b	1.411	0.1254	3.171	0.01111	0.03378
Fam102b	1.407	4.474	4.783	0.0009489	0.006013
Clip2	1.406	6.025	8.444	1.283e-05	0.0005395
Ap1g2	1.406	3.249	7.804	2.435e-05	0.0007086
Hook2	1.406	1.963	4.159	0.002358	0.0111
Cln3	1.405	4.008	4.793	0.0009359	0.005968
S1pr2	1.405	3.053	3.967	0.003155	0.01359
Pcsk1n	1.401	2.816	3.4	0.007668	0.02576
Ust	1.401	2.736	3.089	0.01268	0.03718
Kctd15	1.4	1.549	3.618	0.005427	0.02004
Mthfd2	1.398	4.107	3.757	0.004363	0.01711
Ppp1r14b	1.397	5.051	9.763	3.832e-06	0.000378
Fndc1	1.396	4.525	4.438	0.001558	0.008338
Snhg12	1.391	2.561	3.846	0.003802	0.01553
Slc15a4	1.39	5.137	4.88	0.0008274	0.005512
Myc	1.389	4.938	3.856	0.003743	0.01536
Trim46	1.385	0.8481	4.207	0.002193	0.01056
Srsf11	1.384	7.49	4.701	0.001066	0.006464
Prdx5	1.382	6.519	6.683	8.307e-05	0.001315
Casc5	1.382	2.938	3.463	0.006941	0.02396
Smoc1	1.382	3.217	3.472	0.006842	0.02368
Ccnb1	1.378	3.498	4.302	0.001906	0.009578
P2rx4	1.377	4.806	8.366	1.384e-05	0.000559
Cyba	1.377	6.861	6.954	6.097e-05	0.001141
Dctd	1.377	2.678	4.965	0.0007356	0.005062
Gns	1.375	8.144	7.406	3.707e-05	0.0008724
Psrc1	1.374	1.87	4.016	0.002931	0.01291
Skap2	1.373	5.218	7.252	4.378e-05	0.0009628
Panx1	1.373	3.494	5.696	0.0002767	0.002733
Exoc3l4	1.373	2.789	3.822	0.003948	0.01591
Chst7	1.371	4.253	4.63	0.001179	0.006915
Ankrd37	1.37	3.316	5.127	0.0005881	0.004341
BC030867	1.369	1.345	3.828	0.003912	0.01581
Sox4	1.368	7.151	4.685	0.00109	0.006561
Arhgef39	1.368	0.5781	2.911	0.01696	0.04596
Samd14	1.367	2.729	4.398	0.001653	0.008673
Ube2c	1.366	4.173	3.7	0.004773	0.01818
Eme1	1.365	0.8092	2.919	0.01676	0.04563
Map3k14	1.364	2.563	3.174	0.01105	0.0337
Gfra1	1.359	3.265	2.912	0.01696	0.04596
Slc35c1	1.358	3.967	6.28	0.0001338	0.001754
Metrnl	1.357	2.545	2.918	0.01677	0.04563
Rcc1	1.356	3.943	9.341	5.553e-06	0.000396
Plk1	1.354	3.843	2.934	0.01633	0.04478
Fam20c	1.353	5.953	4.873	0.0008357	0.005542
Scpep1	1.347	6.331	6.883	6.601e-05	0.001174
Kit	1.347	5.873	4.652	0.001143	0.006757
Lrfn1	1.346	1.472	3.796	0.00411	0.01641
Tnfsf8	1.346	3.561	3.441	0.007192	0.02454
Sema4g	1.343	1.622	3.122	0.01202	0.03571
Acp6	1.34	3.841	6.17	0.0001529	0.001883
Col16a1	1.338	3.407	5.04	0.0006625	0.004717
Fbxo5	1.338	2.09	3.408	0.007574	0.02551
Capg	1.337	6.784	5.617	0.0003065	0.002918
Sorl1	1.337	2.956	3.946	0.003261	0.01389
Ung	1.336	2.206	4.37	0.001722	0.008945
Top2a	1.336	6.401	4.341	0.001797	0.00922
Rbm25	1.334	8.009	3.777	0.004234	0.01681
BC017643	1.333	4.977	5.588	0.0003185	0.002986
Kcnj2	1.333	4.725	5.426	0.0003938	0.003363
Tspan7	1.331	5.366	5.83	0.0002335	0.002433
Nfxl1	1.329	3.29	6.713	8.023e-05	0.0013
Mpp6	1.329	5.555	4.498	0.001428	0.007881
Slc35c2	1.328	5.191	10.96	1.429e-06	0.0002288
Dlgap3	1.327	1.41	2.975	0.01527	0.04267
Hist3h2ba	1.326	1.005	3.573	0.005829	0.02105
Slc16a7	1.326	1.178	2.883	0.01778	0.04763
Gpr157	1.325	2.712	4.051	0.002777	0.01247
Pgm2	1.323	5.134	8.3	1.476e-05	0.0005723
Kif18b	1.323	2.398	3.148	0.01153	0.0347
Kcnn4	1.322	2.351	3.093	0.0126	0.03703
Dpysl5	1.32	1.971	2.893	0.01748	0.04705
Cklf	1.318	2.126	3.517	0.006373	0.0224
Adgrb2	1.317	3.51	3.946	0.003259	0.01388
Tnr	1.316	3.775	4.444	0.001544	0.008291
Rp2h	1.315	4.959	6.103	0.000166	0.00198
Prkar1b	1.315	4.173	5.878	0.0002197	0.002356
2700038G22Rik	1.314	0.02849	3.159	0.01132	0.03423
Ggct	1.313	3.221	4.706	0.001059	0.006446
Csdc2	1.313	2.283	3.692	0.004829	0.01834
2410006H16Rik	1.312	4.315	7.205	4.61e-05	0.0009935
Mgat5	1.31	3.5	4.331	0.001824	0.009299
Lrp11	1.31	2.683	3.03	0.01397	0.0399
Taok3	1.308	5.093	7.095	5.207e-05	0.001048
Mybl2	1.307	2.089	3.248	0.009794	0.03071
Ppcdc	1.307	3.03	3.28	0.009309	0.02958
Arnt2	1.306	3.407	3.785	0.004182	0.01663
H2-T10	1.305	5.949	4.527	0.001369	0.007655
Wdhd1	1.303	2.73	3.624	0.005381	0.01991
Ppp1r3d	1.3	3.258	4.601	0.00123	0.007118
Wipf1	1.296	6.245	8.288	1.494e-05	0.0005723
Troap	1.295	1.454	3.398	0.007696	0.02583
Samsn1	1.294	5.008	3.772	0.004267	0.01684
Apol9a	1.294	3.316	3.36	0.008187	0.02704
Olfm1	1.293	5.051	8.382	1.362e-05	0.0005569
Ssr4	1.293	6.204	6.417	0.0001135	0.001584
Cdca5	1.293	2.282	3.11	0.01227	0.03629
Cks1b	1.292	3.476	4.467	0.001494	0.008093
Cenpe	1.29	4.538	5.103	0.0006083	0.004435
Clip3	1.29	5.404	4.976	0.0007236	0.005011
Poc1a	1.289	1.388	2.897	0.01737	0.04681
Scamp2	1.288	6.28	7.886	2.239e-05	0.00068
Wdr81	1.287	5.113	6.066	0.0001736	0.002033
Clspn	1.287	3.038	4.008	0.002966	0.01298
Cdt1	1.281	3.397	4.884	0.0008226	0.005499
Fam19a5	1.28	3.068	4.657	0.001134	0.006727
Itm2c	1.278	9.089	12.83	3.675e-07	0.0001332
Traf4	1.278	3.313	4.268	0.002003	0.009911
Mttp	1.278	1.712	2.946	0.01603	0.04416
Gsg2	1.276	2.543	3.041	0.01373	0.03947
Knstrn	1.273	4.004	3.196	0.01066	0.03277
Eva1a	1.271	4.146	4.948	0.0007526	0.005144
BC064078	1.271	1.098	3.26	0.009617	0.03028
Mfsd12	1.268	3.914	4.805	0.0009199	0.005891
Syt12	1.268	3.727	4.297	0.00192	0.009622
Entpd6	1.267	2.927	4.53	0.001364	0.007639
Naa16	1.266	4.343	3.279	0.009326	0.02963
Dcxr	1.265	3.559	6.134	0.0001597	0.001935
Tdrkh	1.265	2.708	4.409	0.001626	0.008584
Pld3	1.263	7.047	7.338	3.988e-05	0.0009075
Astn1	1.263	2.896	3.312	0.008842	0.02856
Mthfd1l	1.262	4.181	7.346	3.956e-05	0.0009075
AI413582	1.26	3.018	4.989	0.0007109	0.004964
Prps2	1.26	5.006	3.664	0.005047	0.01897
Rad54l	1.259	1.51	3.111	0.01223	0.0362
Parp8	1.258	3.196	3.568	0.005873	0.02119
Ppapdc3	1.254	1.526	3.147	0.01154	0.0347
Dzip3	1.249	3.854	4.861	0.0008501	0.005606
Dpf1	1.247	2.394	3.353	0.008278	0.02725
Rnf19b	1.246	5.689	2.948	0.01598	0.04405
Spag5	1.245	3.192	5.004	0.0006968	0.004877
Adamts9	1.244	6.191	5.856	0.0002257	0.002391
Fanca	1.243	1.772	3.344	0.008396	0.02755
B3gnt5	1.242	2.387	3.743	0.004464	0.01738
Nrxn2	1.241	4.049	4.107	0.002551	0.0117
Gramd1a	1.238	5.355	7.998	1.997e-05	0.000644
Gria4	1.238	2.488	2.985	0.01502	0.04215
Ckap2l	1.237	3.996	3.527	0.006271	0.02214
Dpysl4	1.237	1.384	2.899	0.01729	0.04665
Bola2	1.236	4.522	6.025	0.0001828	0.002112
Kcna6	1.236	3.932	3.475	0.006809	0.0236
Bnip3	1.234	4.444	3.292	0.009122	0.02917
Glrx	1.233	5.582	5.878	0.0002197	0.002356
Zeb2	1.23	5.942	5.498	0.0003582	0.003202
Nkain1	1.23	3.782	4.332	0.001821	0.009298
Fam83h	1.23	0.6025	2.973	0.01533	0.04279
Arid3a	1.227	2.655	5.253	0.0004959	0.00387
Scg5	1.226	2.855	5.045	0.000658	0.004694
Nat8l	1.226	2.567	4.418	0.001606	0.0085
1500012F01Rik	1.226	4.121	4.413	0.001618	0.008548
Bid	1.226	3.18	3.83	0.003899	0.01579
9330182L06Rik	1.226	1.736	3.314	0.008815	0.02851
E2f8	1.226	2.169	2.846	0.0189	0.04986
Neto2	1.226	3.198	2.908	0.01706	0.04614
Hebp1	1.225	6.537	8.086	1.827e-05	0.0006293
Letmd1	1.224	3.929	7.108	5.134e-05	0.001041
Frrs1	1.223	3.899	2.855	0.01862	0.04931
BC051142	1.221	0.3719	3.241	0.009916	0.03101
Slc39a4	1.219	1.807	3.239	0.009937	0.03106
Lyn	1.215	7.477	7.745	2.589e-05	0.0007388
B3gat1	1.215	2.272	3.519	0.006344	0.02233
2310039H08Rik	1.212	2.129	3.655	0.005123	0.0192
Brip1	1.211	2.159	3.4	0.007671	0.02576
Ercc6l	1.211	3.127	3.263	0.00957	0.03017
Pianp	1.21	4.555	4.597	0.001238	0.007141
Pvr	1.21	6.172	4.196	0.002231	0.01067
4930427A07Rik	1.208	1.875	2.873	0.01806	0.04818
Dennd2a	1.208	3.68	2.855	0.01862	0.04931
Cpt1c	1.207	2.503	3.455	0.007024	0.02412
Neu1	1.206	5.072	5.844	0.0002293	0.002411
Igsf10	1.206	3.018	2.847	0.01886	0.04978
Lgals3bp	1.205	8.878	7.055	5.442e-05	0.001072
Psat1	1.204	6.416	7.325	4.044e-05	0.0009151
Kifc1	1.204	2.357	4.614	0.001207	0.007026
Phip	1.203	6.337	3.03	0.01397	0.0399
Vrk2	1.202	2.967	4.68	0.001099	0.006592
Cerk	1.201	5.986	6.546	9.747e-05	0.001447
Ifngr2	1.196	6.401	6.782	7.41e-05	0.001258
Ncam2	1.195	2.034	2.86	0.01844	0.04893
Tsc22d4	1.194	5.795	9.428	5.137e-06	0.0003873
Hn1	1.193	6.015	7.175	4.764e-05	0.001017
Slc12a9	1.188	5.058	9.213	6.233e-06	0.000412
Mafg	1.187	4.357	4.074	0.002681	0.01213
Kif4	1.187	3.718	3.642	0.005229	0.01949
Tnfrsf23	1.184	3.951	3.975	0.003116	0.01347
Igsf3	1.183	3.242	3.843	0.003818	0.01558
Nudt19	1.182	3.945	7.585	3.062e-05	0.0008069
Edem2	1.182	6.075	6.334	0.0001253	0.001686
5830417I10Rik	1.182	2.627	3.829	0.003904	0.0158
Man2b2	1.181	7.058	9.082	7.022e-06	0.0004189
Atp8b1	1.179	3.249	3.954	0.003221	0.01378
Iqgap3	1.178	4.265	4.35	0.001773	0.009135
Ethe1	1.177	3.903	4.277	0.001978	0.009812
Hscb	1.176	3.561	6.098	0.000167	0.001989
Selenbp1	1.176	2.376	2.95	0.01593	0.04396
Galk2	1.175	3.892	6.163	0.0001541	0.001891
Cebpzos	1.175	4.071	5.481	0.0003662	0.003239
4931428F04Rik	1.175	1.916	3.021	0.01417	0.04031
Rps2	1.173	8.5	10.13	2.815e-06	0.0003212
Abcg1	1.173	7.992	5.655	0.0002917	0.002834
Nek6	1.171	5.792	7.645	2.875e-05	0.0007734
Ckb	1.171	7.487	4.592	0.001246	0.007172
Pabpc1	1.169	10.46	11.32	1.089e-06	0.0002003
Aprt	1.169	5.699	10.94	1.459e-06	0.0002304
1700025G04Rik	1.168	3.089	3.716	0.004653	0.01783
Upf3b	1.166	5.849	3.088	0.01269	0.03719
Tnfrsf21	1.165	6.542	6.096	0.0001673	0.001991
Rpl39	1.163	8.195	7.805	2.433e-05	0.0007086
Cenpk	1.163	1.343	2.942	0.01612	0.04435
Pisd-ps1	1.161	3.981	5.136	0.0005813	0.004305
Aurka	1.161	3.066	3.128	0.01191	0.0355
Nt5dc2	1.16	4.708	4.899	0.0008058	0.005406
Aurkb	1.159	3.323	3.229	0.01011	0.03145
G6pdx	1.156	5.846	8.202	1.627e-05	0.0005993
Rpl10a	1.155	7.594	8.415	1.319e-05	0.0005478
Tbc1d8	1.153	4.232	6.857	6.801e-05	0.001193
Slc7a8	1.153	6.337	6.958	6.069e-05	0.00114
Gpt2	1.153	3.774	4.21	0.002185	0.01054
Tspan6	1.151	6.791	6.238	0.0001408	0.001799
Plekhb2	1.151	5.825	4.791	0.000938	0.005975
C1qtnf6	1.151	5.611	3.787	0.004166	0.01659
Ank2	1.149	3.994	3.325	0.00865	0.02816
Atad2	1.146	4.332	7.576	3.09e-05	0.0008074
Pald1	1.146	7.101	6.185	0.0001501	0.001866
Capn5	1.144	4.522	4.562	0.001302	0.007382
Rps26	1.14	8.598	9.502	4.811e-06	0.0003849
Pcdhb22	1.14	3.123	2.961	0.01563	0.04337
Cln6	1.139	4.706	8.914	8.202e-06	0.0004413
Ncln	1.139	6.614	7.257	4.357e-05	0.000961
Tbc1d16	1.137	5.92	11.45	9.845e-07	0.0001958
Fdxr	1.135	2.664	4.09	0.002616	0.01193
Epor	1.135	2.218	3.91	0.003444	0.01445
Gpr137b-ps	1.134	4.133	4.509	0.001406	0.007807
Rplp0	1.133	10.1	11.87	7.227e-07	0.0001724
Arl8a	1.133	5.493	7.645	2.876e-05	0.0007734
Wdr55	1.133	3.525	6.541	9.798e-05	0.001453
Ccdc86	1.132	4.808	7.035	5.568e-05	0.001092
Sergef	1.132	1.787	3.294	0.009099	0.02911
Lrrtm2	1.129	2.614	3.025	0.01408	0.04016
Ptpn1	1.128	7.186	8.371	1.377e-05	0.0005588
Tacc3	1.127	4.254	3.846	0.003803	0.01553
Mcm7	1.126	5.14	5.227	0.0005136	0.003967
F2r	1.126	6.867	4.306	0.001893	0.00953
Plxna3	1.126	2.245	3.483	0.006724	0.02341
Limd2	1.124	5.774	8.179	1.665e-05	0.0006083
Apc2	1.123	2.936	3.209	0.01043	0.03225
Olfml2b	1.123	2.867	3.069	0.0131	0.03813
Nupr1	1.122	3.041	3.133	0.0118	0.03526
Metrn	1.121	4.473	4.564	0.001298	0.007366
Ahi1	1.12	4.861	3.815	0.003992	0.01603
Spc25	1.12	3.152	2.934	0.01635	0.04481
Rhog	1.113	6.686	8.287	1.496e-05	0.0005723
Rad51ap1	1.112	2.695	3.606	0.005534	0.02032
Specc1	1.111	5.314	5.803	0.0002415	0.002489
Tubb6	1.111	6.848	4.135	0.002446	0.01138
1600014C10Rik	1.109	6.02	6.061	0.0001748	0.002038
Dctpp1	1.107	3.824	5.331	0.0004467	0.003624
Spdl1	1.107	1.935	3.149	0.01151	0.03466
Slc39a6	1.106	5.149	5.757	0.0002561	0.002585
Frmd4a	1.104	5.885	6.552	9.679e-05	0.001442
Rgs19	1.103	5.067	6.71	8.05e-05	0.0013
Cndp2	1.103	7.185	5.612	0.0003084	0.002921
Akna	1.103	4.34	4.166	0.002335	0.01102
Eef1e1	1.101	4.137	6.91	6.408e-05	0.001165
Arxes2	1.098	3.418	3.332	0.008554	0.02794
Rps12	1.097	9.424	9.403	5.255e-06	0.0003895
Slc39a11	1.097	4.568	8.605	1.097e-05	0.0005071
Aldoa	1.097	9.586	5.806	0.0002407	0.002483
Map1s	1.096	4.879	6.497	0.0001032	0.001502
Tmem120b	1.096	2.229	4.402	0.001643	0.00863
Wbp5	1.095	7.531	4.774	0.0009615	0.006068
Pfn1	1.094	8.683	5.975	0.0001946	0.002188
Kif14	1.093	1.788	2.982	0.01511	0.04233
Snhg6	1.091	2.423	4.941	0.0007596	0.005178
Ptprj	1.089	4.472	3.593	0.005649	0.02062
Scg3	1.088	4.096	3.478	0.006772	0.0235
Rtkn	1.087	3.863	3.656	0.005117	0.01918
Etv1	1.087	3.327	3.146	0.01156	0.03478
Wdr70	1.087	4.607	3.005	0.01454	0.04114
Tlr6	1.084	3.085	3.996	0.00302	0.01315
Calr3	1.084	2.848	3.947	0.003253	0.01387
8430419L09Rik	1.082	4.449	5.33	0.0004471	0.003624
Me2	1.081	5.433	7.605	2.999e-05	0.0007982
Tpcn2	1.081	3.298	4.303	0.001901	0.00956
1700037H04Rik	1.08	3.197	4.77	0.0009668	0.006083
Rpp38	1.077	1.589	3.456	0.007012	0.0241
Fam131b	1.077	1.468	3.136	0.01175	0.03519
C920025E04Rik	1.076	5.446	3.154	0.01141	0.03444
Zfp365	1.074	3.177	3.685	0.004889	0.0185
Wdfy2	1.07	2.629	4.483	0.00146	0.007985
P4ha1	1.068	6.816	3.537	0.006168	0.02191
Mast3	1.067	4.838	4.937	0.000764	0.0052
Iffo1	1.066	3.36	6.01	0.0001861	0.002137
Mrps18b	1.066	2.878	5.345	0.0004385	0.003581
Rpl32	1.065	9.099	8.716	9.877e-06	0.0004783
Asah1	1.062	7.029	6.978	5.93e-05	0.001131
Abcc1	1.061	5.096	9.165	6.511e-06	0.0004121
Kif22	1.061	3.865	4.028	0.002875	0.01273
Lxn	1.06	5.921	4.359	0.00175	0.009055
Fam111a	1.059	6.104	6.942	6.178e-05	0.001148
Mcam	1.058	8.024	3.725	0.004589	0.01768
Klhl6	1.057	6.839	8.095	1.811e-05	0.0006269
Ext1	1.057	6.117	6.094	0.0001678	0.001995
Grik5	1.056	3.489	4.15	0.002389	0.01119
Pfas	1.056	3.854	3.357	0.008225	0.02713
Ddx31	1.055	3.514	5.223	0.0005165	0.003976
Rrm2	1.055	4.462	3.282	0.00927	0.0295
Pkm	1.054	10.44	6.797	7.287e-05	0.001244
Apex1	1.052	5.024	6.915	6.369e-05	0.001159
Fbrsl1	1.051	4.049	4.95	0.0007511	0.005139
Nlrx1	1.05	3.783	5.305	0.0004626	0.003708
Aig1	1.05	4.236	4.731	0.001022	0.006311
Gpr37l1	1.05	4.679	4.428	0.001581	0.008419
Lpcat1	1.049	4.695	4.489	0.001446	0.007954
Capza1	1.048	5.962	7.125	5.036e-05	0.001031
Ncald	1.048	4.73	3.062	0.01325	0.03842
Actb	1.047	11.9	4.762	0.0009767	0.00613
Gramd1b	1.046	3.569	4.473	0.001481	0.008057
Sap30	1.046	3.445	3.184	0.01087	0.03328
Ampd3	1.044	4.034	6.008	0.0001868	0.002137
Synpo	1.044	6.321	4.557	0.001312	0.007428
Brsk1	1.044	2.791	4.085	0.002636	0.012
Icosl	1.044	4.508	3.836	0.00386	0.01567
Cenpo	1.041	2.687	3.417	0.007471	0.02525
4632428N05Rik	1.04	7.978	5.616	0.0003068	0.002918
Sbk1	1.04	3.882	4.693	0.001078	0.006511
Tmem104	1.039	5.367	6.026	0.0001824	0.002109
Gpr137b	1.039	3.527	4.46	0.00151	0.008159
Anxa6	1.038	8.4	4.811	0.000912	0.00586
Kcnj15	1.038	3.648	4.329	0.00183	0.009313
Ndc80	1.036	3.367	4.988	0.0007117	0.004964
Ankrd13b	1.032	3.795	5.49	0.0003616	0.003217
Gba	1.03	6.681	9.086	6.997e-06	0.0004189
Ctc1	1.03	4.981	5.496	0.0003591	0.003202
Fscn1	1.029	8.692	6.253	0.0001382	0.001782
Ccar1	1.029	7.278	3.265	0.009529	0.03007
Cln8	1.028	5.263	4.799	0.0009278	0.005936
Ogdhl	1.024	2.686	3.679	0.004934	0.01865
Ssh2	1.023	6.796	7.425	3.633e-05	0.0008652
Mogs	1.02	5.084	6.341	0.0001242	0.001679
Nhp2	1.019	5.305	6.516	0.000101	0.00148
Erp29	1.018	7.005	6.292	0.0001318	0.001742
Smpd3	1.018	2.327	3.439	0.007213	0.02459
Fam133b	1.018	5.749	3.038	0.01378	0.03958
Rcbtb2	1.017	5.564	4.192	0.002245	0.01072
Mki67	1.016	6.82	2.915	0.01685	0.04575
Rpl12	1.015	9.031	9.284	5.843e-06	0.0004067
Rrp1b	1.013	4.135	6.71	8.051e-05	0.0013
Sord	1.013	4.492	3.499	0.006553	0.02292
Cdk1	1.012	4.827	3.828	0.003913	0.01581
Pip4k2a	1.011	6.275	4.843	0.0008715	0.005698
Pgam1	1.01	4.897	4.524	0.001375	0.007681
Rassf2	1.01	5.72	4.52	0.001382	0.007706
Wdr62	1.009	2.692	4.045	0.002804	0.01254
Lrrc8d	1.007	5.639	9.025	7.399e-06	0.0004258
Dera	1.007	4.342	5.628	0.0003021	0.002888
Rps28	1.006	7.715	5.921	0.000208	0.002273
Pde4dip	1.006	5.002	5.47	0.0003715	0.00326
Nid2	1.004	8.039	4.43	0.001578	0.008406
Epb4.1l2	1.003	7.589	6.107	0.0001652	0.001978
Gpm6b	1.003	6.479	5.269	0.0004853	0.003814
Incenp	1.002	5.014	4.036	0.002842	0.01264
Rps19	1.001	7.747	6.932	6.245e-05	0.00115
Tec	1.001	4.095	3.096	0.01254	0.03692
Ablim1	-1.001	10.1	-7.467	3.473e-05	0.0008462
1700020I14Rik	-1.001	5.991	-6.531	9.916e-05	0.001467
Slc16a4	-1.004	7.693	-7.406	3.707e-05	0.0008724
0610009O20Rik	-1.005	5.933	-7.501	3.348e-05	0.0008417
Clic4	-1.005	9.796	-6.378	0.0001189	0.001632
Tdrp	-1.006	8.067	-6.273	0.0001348	0.001757
Enox2	-1.01	4.675	-8.261	1.534e-05	0.0005801
Dnaja4	-1.01	5.064	-3.233	0.01004	0.03128
Slc44a1	-1.011	6.279	-7.075	5.326e-05	0.001062
Cep112	-1.011	2.698	-4.363	0.001739	0.009011
Ccm2l	-1.011	6.218	-4.605	0.001223	0.007094
Dennd4c	-1.012	5.261	-5.936	0.0002043	0.002251
Cyp2d22	-1.015	6.939	-3.812	0.004006	0.01606
Glis2	-1.016	4.479	-5.004	0.0006964	0.004877
Wtip	-1.019	5.161	-3.776	0.004241	0.01681
Ctnnb1	-1.02	10.43	-9.61	4.375e-06	0.0003813
Smagp	-1.021	5.321	-4.132	0.002457	0.01141
Rcor3	-1.024	3.68	-4.713	0.001048	0.006406
Slc1a1	-1.025	7.796	-6.886	6.58e-05	0.001174
Thbd	-1.026	7.031	-7.794	2.462e-05	0.0007148
Cmtm8	-1.026	4.73	-6.43	0.0001118	0.00157
Tpk1	-1.026	4.263	-6.234	0.0001414	0.001802
A330009N23Rik	-1.026	4.116	-5.368	0.0004252	0.00352
Lgalsl	-1.027	5.489	-6.252	0.0001384	0.001782
Tspan18	-1.027	6.326	-5.953	0.0002	0.002222
Rab4a	-1.028	4.389	-6.338	0.0001247	0.001681
Nrep	-1.029	7.255	-4.905	0.0007992	0.005372
Fam63a	-1.029	7.52	-4.811	0.0009123	0.00586
Arhgap26	-1.029	5.236	-4.365	0.001734	0.008997
Msrb2	-1.03	4.099	-5.426	0.0003938	0.003363
2810013P06Rik	-1.03	3.45	-5.332	0.000446	0.003622
Ccdc88c	-1.03	2.765	-3.786	0.004174	0.01662
Adgra3	-1.031	8.159	-7.152	4.886e-05	0.001024
Pigg	-1.031	3.766	-5.596	0.000315	0.002962
AW554918	-1.031	3.572	-5.405	0.0004049	0.003414
Ppp3cc	-1.032	4.319	-5.658	0.0002908	0.002831
Stxbp6	-1.032	4.128	-4.819	0.0009014	0.005813
Hsf4	-1.032	1.621	-3.092	0.01262	0.03705
Zbtb8a	-1.032	2.63	-2.914	0.01688	0.04581
Mospd1	-1.033	5.923	-6.673	8.407e-05	0.001321
Shroom1	-1.034	5.026	-4.75	0.0009936	0.006206
Trim34b	-1.038	2.503	-4.006	0.002975	0.01299
Wdr19	-1.04	3.196	-5.243	0.0005027	0.003905
Grb7	-1.04	4.102	-3.23	0.01008	0.03138
P2ry1	-1.041	3.009	-3.776	0.004241	0.01681
Slc2a1	-1.042	11.31	-3.698	0.004788	0.01822
Klhl17	-1.043	3.648	-4.197	0.002229	0.01067
Pacsin3	-1.043	1.925	-3.424	0.007383	0.02502
Rilp	-1.045	1.794	-3.032	0.01393	0.03984
Zfp367	-1.046	4.592	-5.642	0.000297	0.002857
Gch1	-1.048	5.047	-4.071	0.002693	0.01215
Stom	-1.049	7.02	-4.009	0.00296	0.01297
Fzd4	-1.05	6.53	-5.045	0.0006586	0.004694
Pdk2	-1.05	4.636	-4.089	0.002623	0.01196
Stmn1	-1.052	5.658	-8.146	1.721e-05	0.0006146
Amigo1	-1.052	3.422	-2.97	0.0154	0.04289
Fam126b	-1.054	4.044	-6.743	7.748e-05	0.001295
Slc25a24	-1.054	5.267	-5.81	0.0002393	0.002477
Stx3	-1.054	4.925	-3.98	0.003093	0.0134
1300002E11Rik	-1.055	2.484	-4.577	0.001273	0.007272
Cryab	-1.058	4.741	-4.726	0.001029	0.006334
Xaf1	-1.058	6.162	-3.686	0.004874	0.01846
Klhl5	-1.06	7.795	-5.393	0.0004111	0.003454
Tshz1	-1.062	5.768	-9.28	5.864e-06	0.0004067
Fam73a	-1.062	4.385	-7.696	2.725e-05	0.0007494
Stard4	-1.063	5.717	-7.393	3.758e-05	0.000879
Pafah2	-1.063	3.563	-4.08	0.002657	0.01207
Snx11	-1.064	4.969	-7.506	3.331e-05	0.0008408
Cald1	-1.064	7.836	-2.845	0.01893	0.04992
Bend5	-1.065	3.884	-3.857	0.003739	0.01536
Clcn2	-1.065	0.9405	-3.291	0.009136	0.02919
Dact1	-1.065	2.412	-3.174	0.01104	0.03368
Prkch	-1.069	6.904	-6.71	8.052e-05	0.0013
Sptbn1	-1.07	11.06	-7.487	3.399e-05	0.0008438
Rbms3	-1.074	3.524	-4.592	0.001247	0.007172
Ly6c1	-1.074	9.915	-2.927	0.01654	0.04517
Arl2bp	-1.075	7.622	-7.741	2.601e-05	0.0007388
Osbpl1a	-1.076	6.365	-4.424	0.001592	0.008449
Slc27a3	-1.076	1.379	-3.298	0.00904	0.02897
Ptgis	-1.076	7.063	-3.542	0.006124	0.0218
Pcdh19	-1.077	6.371	-5.185	0.0005437	0.004113
Mex3c	-1.078	5.256	-6.706	8.091e-05	0.0013
Myo6	-1.079	7.025	-9.193	6.344e-06	0.0004121
Habp4	-1.079	4.449	-6.365	0.0001208	0.001651
Dand5	-1.079	1.577	-2.878	0.01791	0.0479
Itga6	-1.08	8.192	-7.194	4.668e-05	0.001001
4930578C19Rik	-1.08	4.572	-5.284	0.0004756	0.003757
Mark1	-1.08	3.64	-3.29	0.009159	0.02925
Ltbp1	-1.083	4.441	-3.842	0.003828	0.01559
Cntln	-1.084	4.834	-8.899	8.314e-06	0.0004435
Impdh1	-1.085	7.152	-6.725	7.91e-05	0.0013
Rnf167	-1.086	5.449	-6.346	0.0001236	0.001676
Gimap5	-1.086	4.998	-4.727	0.001027	0.006329
Timp3	-1.086	9.036	-4.014	0.002936	0.01291
Nynrin	-1.086	5.167	-3.605	0.005539	0.02032
Cldn12	-1.087	4.673	-7.56	3.146e-05	0.0008108
Ccnyl1	-1.088	4.386	-4.192	0.002245	0.01072
Map2k6	-1.089	3.301	-5.039	0.0006635	0.004719
Gjc1	-1.09	5.614	-3.713	0.004676	0.0179
A930004D18Rik	-1.091	2.101	-3.7	0.004772	0.01818
Cc2d2a	-1.092	3.649	-4.508	0.001408	0.007808
Mpzl1	-1.093	8.362	-6.927	6.284e-05	0.00115
Id1	-1.094	6.986	-8.144	1.724e-05	0.0006146
Hmgcs2	-1.094	8.161	-3.403	0.007643	0.02569
Nrgn	-1.094	2.733	-2.845	0.01893	0.04992
Dmd	-1.096	4.731	-3.872	0.003653	0.01508
B9d1	-1.1	2.609	-4.45	0.001532	0.008234
Ephx1	-1.101	6.216	-7.737	2.613e-05	0.000739
Marveld2	-1.101	5.253	-5.61	0.0003094	0.002927
Sos2	-1.102	6.18	-10.03	3.047e-06	0.0003418
Foxo1	-1.102	6.788	-8.369	1.38e-05	0.0005588
Ephb4	-1.102	7.526	-4.667	0.001119	0.006668
Cachd1	-1.103	5.779	-9.306	5.73e-06	0.0004064
Unc5b	-1.104	6.635	-7.42	3.65e-05	0.0008677
Hapln3	-1.104	2.864	-3.722	0.004609	0.01773
Igfbp5	-1.104	5.706	-2.972	0.01536	0.04285
Trpm6	-1.106	5.118	-6.343	0.000124	0.001679
Dab2ip	-1.106	7.024	-5.609	0.0003096	0.002927
Six5	-1.106	2.363	-4.164	0.002341	0.01103
Ndn	-1.109	4.007	-4.223	0.002142	0.01037
Ifi44	-1.109	7.601	-4.123	0.002491	0.01152
Slc22a5	-1.11	4.677	-7.559	3.15e-05	0.0008108
Gstt3	-1.11	2.856	-5.94	0.0002031	0.002247
Ndrg2	-1.111	5.181	-3.188	0.0108	0.03312
Hey1	-1.113	5.336	-7.917	2.168e-05	0.0006746
Auts2	-1.114	4.018	-5.767	0.0002528	0.002566
Cyth3	-1.114	6.177	-5.616	0.0003072	0.002918
Pde3a	-1.114	4.14	-3.608	0.005516	0.02028
Cdadc1	-1.115	4.973	-9.276	5.889e-06	0.0004067
Igsf5	-1.115	5.257	-5.418	0.0003978	0.00338
Zbtb10	-1.117	4.033	-3.529	0.006245	0.02208
Pcmtd1	-1.119	6.979	-5.268	0.0004857	0.003814
Hlcs	-1.121	4.34	-5.497	0.0003587	0.003202
Abcc4	-1.121	8.386	-5.221	0.0005175	0.003976
Itsn1	-1.123	5.852	-8.562	1.144e-05	0.0005158
Zfp820	-1.123	3.17	-5.837	0.0002314	0.002422
Ifit1bl2	-1.124	1.72	-3.711	0.004692	0.01794
Sorbs2	-1.125	7.628	-7.401	3.727e-05	0.0008748
Arhgef10	-1.125	5.737	-6.583	9.328e-05	0.001407
Fam189a2	-1.126	4.542	-7.302	4.149e-05	0.000934
Unc13b	-1.127	6.406	-7.744	2.593e-05	0.0007388
Ceacam1	-1.127	5.142	-7.597	3.024e-05	0.0008
Fam84b	-1.127	5.735	-4.694	0.001076	0.006508
Sh3yl1	-1.128	1.222	-2.904	0.01717	0.04638
Taf7	-1.129	4.447	-5.273	0.0004825	0.003801
Slc38a5	-1.129	9.604	-4.328	0.001834	0.009323
Cyp39a1	-1.13	3.6	-5.656	0.0002916	0.002834
Taf9b	-1.131	5.082	-8.008	1.976e-05	0.0006431
Tpm1	-1.131	8.217	-6.448	0.0001094	0.001552
Ston1	-1.131	3.509	-3.153	0.01142	0.03448
Pkia	-1.132	5.583	-10.22	2.61e-06	0.0003058
Prpf40b	-1.132	4.393	-6.68	8.333e-05	0.001318
Jup	-1.133	7.558	-7.83	2.373e-05	0.0007003
Plcb1	-1.134	5.357	-5.574	0.000324	0.003009
St3gal6	-1.135	7.533	-6.712	8.028e-05	0.0013
Slc39a10	-1.139	9.679	-6.279	0.0001339	0.001754
Pkp4	-1.139	7.48	-5.446	0.0003836	0.003327
Pitpnm2	-1.142	6.126	-5.448	0.0003824	0.003321
Slco1c1	-1.142	11.38	-4.74	0.001008	0.006259
Arl4a	-1.147	7.011	-6.691	8.226e-05	0.001308
Tcf7	-1.147	6.131	-6.444	0.0001099	0.001556
Abcg2	-1.149	8.7	-4.808	0.0009152	0.00587
Prickle2	-1.154	3.286	-3.58	0.005765	0.0209
Foxp1	-1.155	6.698	-9.008	7.514e-06	0.0004306
Flt1	-1.156	10.77	-6.733	7.841e-05	0.0013
Shroom4	-1.156	6.403	-6.325	0.0001268	0.001698
5031425E22Rik	-1.156	3.987	-5.155	0.000566	0.004223
Ptpn21	-1.16	4.123	-5.846	0.0002288	0.00241
Adgre5	-1.16	7.549	-5.869	0.0002222	0.002374
Gstm7	-1.16	6.018	-4.426	0.001587	0.00843
Rsrp1	-1.162	6.282	-3.298	0.009039	0.02897
B630019K06Rik	-1.163	2.732	-5.63	0.0003015	0.002884
Pdzd2	-1.165	5.851	-5.564	0.0003283	0.003034
2310022B05Rik	-1.166	6.945	-5.544	0.0003371	0.003076
Apcdd1	-1.168	10.55	-5.174	0.0005521	0.004164
Unc45b	-1.17	6.049	-6.519	0.0001005	0.001478
Epn2	-1.172	7.006	-7.453	3.523e-05	0.0008529
Tmem98	-1.175	6.79	-8.466	1.256e-05	0.0005335
Tm7sf3	-1.181	5.781	-8.578	1.127e-05	0.0005118
Lama3	-1.181	4.455	-4.728	0.001025	0.006323
Acy3	-1.181	2.828	-4.067	0.002711	0.01221
Glcci1	-1.185	4.316	-7.17	4.791e-05	0.001019
Hspa12b	-1.186	8.163	-4.486	0.001453	0.007957
Nfatc4	-1.187	3.718	-2.858	0.01851	0.04904
Zhx3	-1.188	4.707	-6.18	0.0001511	0.001872
Pam	-1.189	7.821	-6.75	7.691e-05	0.00129
Zfp366	-1.189	6.54	-5.822	0.0002357	0.002449
Mx2	-1.189	3.849	-3.034	0.01388	0.03979
Arntl	-1.191	4.761	-9.371	5.405e-06	0.0003895
Enpp4	-1.191	6.114	-6.17	0.000153	0.001883
Nr3c1	-1.192	7.448	-9.048	7.246e-06	0.0004189
Slfn5	-1.192	9.153	-5.903	0.0002129	0.002305
AW011738	-1.192	4.192	-4.765	0.0009728	0.006114
Mfsd2a	-1.193	8.636	-5.477	0.0003681	0.003246
Serpinb9	-1.194	7.315	-4.944	0.000757	0.005166
C1qtnf9	-1.195	2.036	-4.02	0.002911	0.01284
Txnrd3	-1.196	3.259	-5.366	0.000426	0.003525
Zfp300	-1.197	1.262	-4.028	0.002875	0.01273
Rcan2	-1.199	4.963	-3.924	0.003374	0.01423
Lsr	-1.201	8.345	-6.324	0.0001268	0.001698
Als2cl	-1.202	4.92	-5.458	0.0003772	0.003292
Gbp9	-1.202	7.43	-4.091	0.002615	0.01193
Cd59a	-1.202	5.526	-4.026	0.002885	0.01275
Hdac11	-1.202	2.98	-3.32	0.008729	0.02834
Tpd52l1	-1.203	5.53	-8.735	9.7e-06	0.0004775
Acad12	-1.206	2.484	-3.826	0.003921	0.01584
Stox1	-1.206	1.906	-3.197	0.01064	0.03273
Layn	-1.207	6.185	-5.83	0.0002333	0.002433
Zc2hc1a	-1.207	4.083	-5.516	0.0003499	0.00316
Bbs4	-1.209	2.848	-6.677	8.368e-05	0.001318
Pde5a	-1.209	5.607	-3.767	0.004301	0.01694
Eml1	-1.211	5.744	-6.251	0.0001385	0.001782
Sorbs1	-1.211	6.677	-5.421	0.0003962	0.003378
Mme	-1.212	2.96	-3.532	0.006215	0.02202
Fstl1	-1.213	6.759	-4.343	0.001792	0.009202
Kank3	-1.214	7.523	-7.083	5.279e-05	0.001058
Myo1d	-1.214	6.43	-6.979	5.929e-05	0.001131
Syne1	-1.214	4.912	-6.715	8e-05	0.0013
Mxra7	-1.215	5.386	-7.811	2.418e-05	0.0007084
Dnm3	-1.215	5.867	-6.771	7.508e-05	0.001269
Gata2	-1.215	6.329	-5.213	0.0005232	0.004001
Nxpe2	-1.218	2.441	-4.355	0.001761	0.009093
9530082P21Rik	-1.218	5.772	-3.752	0.004401	0.01722
Traf3ip2	-1.22	1.268	-3.582	0.005748	0.02087
Grasp	-1.222	5.677	-4.007	0.002969	0.01298
Nr2f2	-1.223	4.989	-3.034	0.01389	0.03979
Fam13c	-1.224	6.384	-5.477	0.000368	0.003246
Gatsl3	-1.225	4.563	-4.857	0.0008552	0.005617
St6galnac2	-1.225	6.337	-3.789	0.004156	0.01656
Gstk1	-1.229	3.988	-6.731	7.854e-05	0.0013
Ptprb	-1.23	10.89	-6.194	0.0001486	0.001862
Megf9	-1.231	3.522	-7.891	2.227e-05	0.0006797
Cyb561	-1.231	5.83	-4.867	0.0008434	0.005576
Fam20a	-1.231	2.476	-3.723	0.004606	0.01773
Usp43	-1.236	2.022	-4.303	0.001903	0.009563
Ptrf	-1.237	8.765	-5.577	0.0003231	0.003009
Irf7	-1.237	8.559	-4.143	0.002415	0.01128
Pard3	-1.238	5.782	-6.279	0.000134	0.001754
Podxl	-1.241	10.06	-8.716	9.874e-06	0.0004783
Abhd14b	-1.242	3.87	-7.14	4.953e-05	0.001028
Foxo4	-1.247	5.679	-8.74	9.654e-06	0.0004775
Mpp7	-1.249	3.982	-6.771	7.505e-05	0.001269
Btbd3	-1.25	5.632	-6.996	5.814e-05	0.001116
Hcar1	-1.251	2.05	-3.458	0.006994	0.02408
Cdh6	-1.251	2.553	-3.33	0.008586	0.02801
Pdgfd	-1.256	5.337	-7.922	2.159e-05	0.0006746
Fcgrt	-1.258	7.999	-8.588	1.116e-05	0.0005103
Dync1i1	-1.259	1.062	-3.309	0.008886	0.02861
Tmem246	-1.261	3.964	-3.565	0.005898	0.02124
Maoa	-1.264	8.808	-6.569	9.489e-05	0.001426
Afap1l1	-1.264	8.591	-6.377	0.0001191	0.001632
Cep126	-1.265	0.6747	-3.144	0.0116	0.03485
Abcc6	-1.266	5.528	-10.59	1.925e-06	0.0002552
4930523C07Rik	-1.269	4.836	-8.607	1.096e-05	0.0005071
Fam57a	-1.269	4.342	-5.198	0.0005339	0.004064
Sox9	-1.271	4.186	-3.041	0.01371	0.03945
St6galnac3	-1.272	5.469	-9.113	6.826e-06	0.0004172
Zbtb46	-1.272	3.6	-5.443	0.0003849	0.00333
Kitl	-1.275	8.148	-8.71	9.936e-06	0.0004791
Phldb2	-1.275	6.159	-7.13	5.007e-05	0.001028
Zfp651	-1.275	4.408	-4.384	0.001688	0.008816
Arap2	-1.277	5.829	-7.711	2.683e-05	0.0007475
Esyt2	-1.278	8.302	-11.45	9.834e-07	0.0001958
Cyp26b1	-1.278	2.62	-3.223	0.0102	0.03166
Tsc22d1	-1.279	10.18	-10.73	1.725e-06	0.0002433
Ghr	-1.279	4.619	-4.52	0.001382	0.007706
Gja4	-1.28	6.039	-7.063	5.397e-05	0.001065
Cuedc1	-1.28	5.297	-6.434	0.0001112	0.001569
She	-1.286	7.754	-11.02	1.366e-06	0.000224
Mllt3	-1.286	5.467	-9.534	4.678e-06	0.0003813
Ccdc157	-1.286	4.077	-5.964	0.0001972	0.002208
Kdr	-1.287	10.44	-10.11	2.844e-06	0.0003218
Wasf3	-1.287	2.123	-3.744	0.004458	0.01737
Tmie	-1.287	1.668	-3.032	0.01391	0.03981
Adamts14	-1.287	1.267	-2.963	0.01559	0.04332
Crip2	-1.288	8.146	-9.82	3.648e-06	0.0003682
Efnb2	-1.29	5.375	-4.86	0.0008516	0.005611
Clstn1	-1.294	7.34	-10.37	2.293e-06	0.0002866
Foxc1	-1.295	6.377	-7.751	2.573e-05	0.0007388
Slc35g2	-1.296	1.441	-3.316	0.008787	0.02844
BC022687	-1.297	2.195	-3.832	0.003884	0.01575
Palld	-1.297	4.466	-3.883	0.00359	0.01487
Ccdc85a	-1.299	6.048	-4.427	0.001583	0.00842
Elmo3	-1.299	1.745	-3.503	0.006515	0.02283
Tns1	-1.3	8.718	-5.435	0.0003893	0.003348
Cyyr1	-1.301	6.37	-5.76	0.000255	0.002577
Mfsd6	-1.301	4.582	-5.556	0.0003318	0.003051
Fam101b	-1.303	8.971	-6.42	0.0001131	0.00158
Ccnd2	-1.303	6.357	-6.251	0.0001385	0.001782
H2afy2	-1.303	3.643	-4.853	0.0008597	0.005641
Rab11fip3	-1.304	5.343	-7.917	2.168e-05	0.0006746
Ramp2	-1.304	8.452	-7.407	3.701e-05	0.0008724
Lef1	-1.307	6.372	-8.753	9.541e-06	0.0004775
Plcb4	-1.307	5.219	-6.927	6.284e-05	0.00115
Hspb1	-1.312	6.346	-3.831	0.003893	0.01577
Fut8	-1.313	6.513	-11.26	1.135e-06	0.0002003
Gpd2	-1.314	7.684	-9.416	5.194e-06	0.0003873
Cmpk2	-1.315	6.511	-4.44	0.001555	0.008327
Cbfa2t3	-1.317	5.858	-6.688	8.262e-05	0.001311
Sytl4	-1.317	3.375	-5.831	0.000233	0.002433
Tspan5	-1.319	6.792	-7.752	2.57e-05	0.0007388
Kcna1	-1.322	2.225	-3.717	0.00465	0.01782
Yap1	-1.323	6.929	-8.909	8.238e-06	0.0004413
Armcx1	-1.325	3.779	-7.573	3.101e-05	0.0008074
Gpld1	-1.325	1.428	-4.256	0.002039	0.01002
Isg20	-1.328	4.998	-4.508	0.001408	0.007808
Ankrd33b	-1.328	4.362	-3.463	0.006938	0.02396
Gas6	-1.33	7.261	-4.031	0.002864	0.0127
Susd4	-1.33	2.129	-3.34	0.008446	0.02765
Scara3	-1.331	2.048	-4.431	0.001575	0.008396
Ntn1	-1.335	5.115	-4.624	0.00119	0.006951
Gm5127	-1.337	3.998	-4.253	0.00205	0.01006
Fam69a	-1.338	5.287	-7.218	4.548e-05	0.0009856
Ndufa4l2	-1.339	4.034	-2.931	0.01643	0.04495
Fhl1	-1.341	3.567	-6.266	0.0001361	0.001768
Reck	-1.342	5.369	-6.83	7.013e-05	0.001211
Lrrn3	-1.343	6.386	-5.955	0.0001995	0.002221
Mgll	-1.344	7.424	-6.205	0.0001465	0.001844
Golim4	-1.344	7.953	-5.593	0.0003163	0.002968
Nqo1	-1.344	2.076	-3.501	0.006532	0.02287
Sgms1	-1.345	8.559	-3.439	0.007207	0.02458
Zic5	-1.346	1.522	-3.731	0.004544	0.0176
Pdxk	-1.347	6.315	-6.171	0.0001527	0.001883
Gsta4	-1.349	5.433	-5.166	0.000558	0.004189
Mid2	-1.35	3.8	-6.209	0.0001458	0.00184
Lzts1	-1.351	2.936	-4.204	0.002205	0.0106
Morn2	-1.356	0.9911	-2.933	0.01637	0.04484
Pik3ip1	-1.357	4.825	-5.241	0.000504	0.003909
Nr1d1	-1.359	4.804	-2.914	0.01689	0.04581
Gm13889	-1.36	4.857	-4.038	0.00283	0.01262
Efnb1	-1.361	4.139	-6.485	0.0001046	0.001512
Crip1	-1.362	5.292	-5.474	0.0003697	0.003252
Mob3b	-1.362	3.592	-4.758	0.0009827	0.006156
Ddit4	-1.363	6.125	-4.967	0.0007336	0.005056
Endou	-1.364	2.177	-3.511	0.006431	0.02257
Trerf1	-1.366	3.336	-5.483	0.0003652	0.003238
Fyco1	-1.366	7.624	-4.13	0.002465	0.01144
Col1a2	-1.366	6.409	-3.321	0.008706	0.02828
Vcam1	-1.366	8.227	-3.179	0.01095	0.03347
Nrbp2	-1.367	2.682	-4.036	0.002842	0.01264
A430035B10Rik	-1.368	1.569	-4.515	0.001393	0.007749
Egflam	-1.371	6.578	-4.737	0.001012	0.006278
Gpc4	-1.372	3.056	-3.308	0.008898	0.02863
Klf11	-1.374	4.512	-6.852	6.843e-05	0.001196
Ushbp1	-1.376	6.595	-9.748	3.88e-06	0.000378
B4galt4	-1.377	5.946	-6.185	0.0001501	0.001866
Cacna1c	-1.377	2.619	-2.855	0.0186	0.04927
Thra	-1.378	6.399	-9.676	4.132e-06	0.000378
Tbc1d4	-1.378	6.229	-4.249	0.002061	0.0101
Nampt	-1.382	10.06	-8.152	1.71e-05	0.0006141
Adcy5	-1.382	3.371	-3.099	0.01248	0.03678
Fam181b	-1.386	3.702	-5.604	0.000312	0.002937
Pard6g	-1.386	4.551	-5.219	0.000519	0.003978
Dhcr24	-1.388	5.722	-8.099	1.804e-05	0.0006264
Sh3rf1	-1.389	4.291	-8.481	1.237e-05	0.0005335
Aqp11	-1.392	4.4	-4.443	0.001547	0.008294
Higd1b	-1.392	4.54	-3.517	0.006365	0.02239
Gm5069	-1.393	2.298	-4.6	0.001232	0.00712
Unkl	-1.393	1.945	-4.323	0.001846	0.009371
Axin2	-1.394	4.721	-6.678	8.349e-05	0.001318
Sh3d21	-1.397	2.803	-4.642	0.00116	0.006843
Npr1	-1.397	6.121	-4.876	0.0008319	0.005525
C630043F03Rik	-1.397	3.183	-4.466	0.001497	0.008103
Rbpms2	-1.397	2.542	-3.371	0.008042	0.02668
Slc40a1	-1.398	9.261	-6.995	5.82e-05	0.001116
Sdr39u1	-1.399	3.322	-5.323	0.0004517	0.003648
4930443O20Rik	-1.403	0.5494	-2.892	0.0175	0.04708
Abcb9	-1.405	2.527	-3.536	0.006182	0.02193
Gipc3	-1.406	3.961	-6.07	0.0001728	0.002028
Fmo2	-1.407	2.821	-3.373	0.008008	0.0266
Ptprm	-1.408	7.727	-11.65	8.471e-07	0.0001853
Marveld1	-1.408	5.892	-5.737	0.0002628	0.00263
Pik3r3	-1.409	6.342	-8.959	7.867e-06	0.0004369
Aif1l	-1.409	5.164	-6.463	0.0001075	0.001537
Srms	-1.412	2.517	-5.631	0.0003011	0.002882
Wfdc1	-1.416	7.287	-5.615	0.0003072	0.002918
Cdc42bpg	-1.42	2.936	-4.968	0.0007324	0.005056
Epas1	-1.423	10.63	-5.218	0.0005198	0.003982
Lrrc32	-1.424	5.414	-4.825	0.0008939	0.005784
Smpdl3a	-1.426	6.756	-9.419	5.179e-06	0.0003873
Nos1	-1.426	5.017	-3.893	0.003534	0.01473
Igdcc3	-1.426	0.9685	-2.881	0.01783	0.04774
Cml1	-1.427	1.802	-5.139	0.0005788	0.004294
Foxf1	-1.428	4.84	-8.407	1.329e-05	0.0005502
Sun1	-1.429	5.79	-8.505	1.209e-05	0.0005323
Amot	-1.43	5.903	-11.32	1.084e-06	0.0002003
Tet1	-1.432	2.206	-5.242	0.0005032	0.003905
Capn2	-1.433	7.689	-10.7	1.757e-06	0.0002433
Nudt12	-1.436	3.159	-6.133	0.00016	0.001935
Pard3b	-1.436	3.615	-5.605	0.0003115	0.002935
C1s1	-1.443	3.819	-2.995	0.01479	0.04164
Rassf8	-1.444	4.498	-9.002	7.559e-06	0.0004313
Lrrc49	-1.445	5.208	-9.155	6.568e-06	0.0004124
Spock2	-1.445	12.17	-5.736	0.0002631	0.002632
Cthrc1	-1.446	3.598	-8.205	1.622e-05	0.0005993
Art3	-1.446	3.583	-4.117	0.002515	0.0116
Col4a3bp	-1.451	7.407	-10.13	2.813e-06	0.0003212
Klf9	-1.452	6.06	-6.231	0.000142	0.001806
Tbxa2r	-1.454	3.863	-5.676	0.0002842	0.002783
Rfx2	-1.455	1.566	-5.094	0.0006154	0.004477
Itga7	-1.455	5.123	-3.481	0.006743	0.02345
Hip1r	-1.456	6.156	-7.111	5.116e-05	0.001039
Bsg	-1.458	12.8	-9.86	3.525e-06	0.0003614
Prkg1	-1.46	4.535	-6.576	9.41e-05	0.001418
Slc30a1	-1.466	7.989	-7.143	4.938e-05	0.001028
Lancl3	-1.466	2.734	-6.364	0.000121	0.001652
Apba1	-1.469	2.643	-4.575	0.001278	0.007279
Adamts10	-1.473	5.064	-8.464	1.257e-05	0.0005335
Eml5	-1.474	0.9946	-3.998	0.003011	0.01313
Bcam	-1.475	8.292	-7.079	5.301e-05	0.00106
Eml6	-1.475	2.628	-4.439	0.001556	0.008329
Mycl	-1.476	2.801	-5.963	0.0001975	0.002209
Rab11fip1	-1.479	5.501	-5.263	0.0004892	0.003832
Acss3	-1.479	1.173	-3.563	0.005923	0.02129
Pip5k1b	-1.48	4.004	-5.872	0.0002212	0.002368
Ocln	-1.484	7.468	-5.806	0.0002407	0.002483
Slc18b1	-1.484	2.578	-5.391	0.0004123	0.003458
Evc	-1.484	3.383	-4.367	0.00173	0.008983
Tcea3	-1.486	1.714	-3.842	0.003823	0.01558
Slc6a17	-1.489	3.614	-3.306	0.008919	0.02869
Klf4	-1.491	6.946	-3.483	0.006717	0.02339
Arhgap44	-1.492	1.407	-3.682	0.004905	0.01856
Rd3	-1.497	1.663	-4.178	0.002292	0.01087
Aim1	-1.498	4.657	-4.83	0.0008883	0.005762
Lynx1	-1.498	6.089	-4.846	0.0008686	0.005688
Ppap2b	-1.501	5.143	-4.889	0.0008168	0.005469
Atp10a	-1.501	7.452	-4.419	0.001602	0.008486
Rnf144b	-1.503	6.739	-4.72	0.001037	0.006356
H2-T24	-1.503	5.796	-4.373	0.001715	0.008911
Calcrl	-1.506	6.156	-8.397	1.343e-05	0.0005517
Ankrd6	-1.506	3.897	-7.466	3.476e-05	0.0008462
Tgfbr3	-1.508	5.539	-5.966	0.0001968	0.002207
Spin4	-1.513	1.353	-4.469	0.001489	0.008082
Smco4	-1.514	4.164	-7.131	5.005e-05	0.001028
Inpp4b	-1.514	5.095	-3.751	0.004405	0.01723
Atoh8	-1.515	2.291	-5.222	0.0005169	0.003976
Efr3b	-1.521	7.621	-13.6	2.202e-07	0.0001193
Slc29a4	-1.522	4.384	-7.442	3.565e-05	0.0008559
Phf1	-1.522	3.912	-6.526	9.975e-05	0.001471
Mylpf	-1.523	1.428	-4.402	0.001643	0.00863
Ccdc136	-1.523	1.416	-4.319	0.001858	0.009409
Mgst1	-1.527	3.551	-6.242	0.0001401	0.001793
Gm16576	-1.527	1.192	-2.885	0.01771	0.04752
[truncated: 506 more rows]

## Sheet: DEG_BS_vs_DMG_EC
Gene ID	logFC	AveExpr	t	P.Value	adj.P.Val
Fscn1	3.19	6.834	28.76	2.314e-09	3.008e-05
Abca1	2.208	7.609	18.31	8.148e-08	0.0003064
Fkbp10	2.003	5.963	18.08	9e-08	0.0003064
A4galt	-2.381	4.731	-17.43	1.195e-07	0.0003064
Fbln2	-2.025	7.551	-16.63	1.727e-07	0.0003064
Pcx	1.48	6.221	16.67	1.697e-07	0.0003064
Ecm2	-2.064	6.755	-16.51	1.825e-07	0.0003064
Syne1	-1.997	6.39	-16.45	1.885e-07	0.0003064
Col14a1	-2.896	5.253	-16.14	2.184e-07	0.0003155
Cdk19	-1.875	7.701	-15.56	2.9e-07	0.000377
Mturn	-1.913	6.152	-15.04	3.772e-07	0.0003956
Nov	-2.943	4.861	-15.25	3.397e-07	0.0003956
Ifit1	1.926	6.927	14.68	4.549e-07	0.0003956
Nampt	1.73	10.03	14.69	4.541e-07	0.0003956
Jak3	1.503	6.424	14.55	4.869e-07	0.0003956
Slc29a1	1.373	6.255	14.29	5.616e-07	0.0004217
Abca5	-1.612	4.468	-14.59	4.781e-07	0.0003956
Pcdhgc3	1.142	6.763	13.78	7.409e-07	0.0004817
Apln	3.045	7.152	13.37	9.38e-07	0.0005303
Dcbld1	2.371	4.052	14.16	6.011e-07	0.0004217
P2ry1	-1.76	4.301	-13.5	8.707e-07	0.0005303
Prdm16	-2.201	4.559	-13.38	9.326e-07	0.0005303
Serpini1	-2.042	5.313	-13.06	1.119e-06	0.0005879
Itga5	1.344	7.232	12.99	1.17e-06	0.0005879
Steap3	1.614	6.566	12.77	1.332e-06	0.0005931
Adamtsl2	2.847	6.191	12.76	1.339e-06	0.0005931
Ehd3	-1.246	5.831	-12.59	1.49e-06	0.0005931
Fam13a	1.423	5.174	12.54	1.534e-06	0.0005931
Pdlim2	-1.553	4.692	-12.55	1.527e-06	0.0005931
Tubb5	1.211	8.875	12.41	1.659e-06	0.0005931
Tppp3	-1.922	3.956	-12.68	1.409e-06	0.0005931
Mamdc2	-2.152	4.107	-12.6	1.48e-06	0.0005931
Alox12	-1.774	4.426	-12.4	1.666e-06	0.0005931
Irf6	-2.883	4.593	-12.45	1.62e-06	0.0005931
Gm13889	-1.657	6.243	-12.27	1.805e-06	0.0005931
Smox	1.496	6.778	12.28	1.803e-06	0.0005931
Nomo1	1.311	9.395	12.26	1.825e-06	0.0005931
Kctd17	1.14	6.553	12.1	2.009e-06	0.0006066
Pglyrp1	1.536	8.476	12.1	2.018e-06	0.0006066
Adcy9	-1.347	5.948	-12.06	2.062e-06	0.0006066
Stab1	1.239	8.615	12.03	2.1e-06	0.0006066
Htra3	3.466	5.913	11.97	2.183e-06	0.0006136
Rtp4	1.834	6.097	11.95	2.218e-06	0.0006136
Dnah6	3.207	3.832	12.98	1.176e-06	0.0005879
Aif1l	-1.782	6.646	-11.85	2.359e-06	0.000639
Apcdd1	1.875	10.36	11.74	2.536e-06	0.0006678
Gkn3	-3.037	6.343	-11.69	2.613e-06	0.0006678
Mgp	-1.96	7.984	-11.69	2.619e-06	0.0006678
Myh10	1.805	8.745	11.5	2.972e-06	0.0007183
Ssfa2	-1.225	7.829	-11.49	2.983e-06	0.0007183
Stk38l	-1.46	4.716	-11.44	3.086e-06	0.0007183
Ifit3	2.243	6.707	11.44	3.091e-06	0.0007183
Lrp8	2.595	8.044	11.44	3.094e-06	0.0007183
Serpine2	1.478	8.795	11.4	3.174e-06	0.0007192
Gas2l3	3.16	3.821	12.1	2.018e-06	0.0006066
Ptgfr	-3.497	2.619	-14.12	6.162e-07	0.0004217
Fam20a	-1.847	3.905	-11.38	3.208e-06	0.0007192
Gstm7	1.081	6.148	11.21	3.597e-06	0.0007515
Sncg	-2.449	5.577	-11.18	3.682e-06	0.0007515
Aph1b	-1.387	4.057	-11.21	3.588e-06	0.0007515
Fam111a	1.561	4.94	11.14	3.784e-06	0.0007515
Fhl1	-1.922	5.08	-11.12	3.815e-06	0.0007515
Lrig1	-1.278	6.011	-11.13	3.803e-06	0.0007515
Slc7a8	1.773	5.03	11.07	3.944e-06	0.0007598
Sncaip	-1.748	3.773	-11.21	3.598e-06	0.0007515
Snhg18	-1.912	4.06	-11.13	3.804e-06	0.0007515
Tbc1d14	1.319	7.111	11.06	3.975e-06	0.0007598
Meox1	3.533	5.123	11.04	4.032e-06	0.0007598
Ebf1	-1.041	7.398	-10.98	4.205e-06	0.0007644
Cyth3	-1.047	7.2	-10.97	4.233e-06	0.0007644
Gdpd5	1.135	6.343	10.93	4.349e-06	0.0007655
Irf7	3.331	7.775	10.93	4.357e-06	0.0007655
Angpt1	-2.081	5.074	-10.85	4.602e-06	0.0007767
Slco2b1	1.28	8.608	10.89	4.487e-06	0.0007697
Ssbp2	-1.419	3.96	-10.88	4.499e-06	0.0007697
Cd320	1.114	6.196	10.82	4.686e-06	0.0007767
Tmem38b	-1.406	4.553	-10.76	4.915e-06	0.0007767
Cd9	-1.34	6.646	-10.81	4.738e-06	0.0007767
Kdr	1.253	10.57	10.78	4.842e-06	0.0007767
Ntn1	-1.642	6.488	-10.76	4.902e-06	0.0007767
Atp2b4	-2.524	6.817	-10.74	4.958e-06	0.0007767
Mettl7a1	-1.592	4.894	-10.67	5.205e-06	0.0007869
Arl4a	1.02	7.17	10.7	5.101e-06	0.0007869
Csrp2	1.531	7.524	10.69	5.167e-06	0.0007869
Kcnb1	-2.214	3.939	-10.62	5.413e-06	0.0008089
Ifi27l2a	4.283	4.488	10.99	4.168e-06	0.0007644
Slc31a1	1.553	8.336	10.56	5.662e-06	0.000824
Slc38a5	1.352	9.617	10.52	5.797e-06	0.000824
Ptprr	-1.587	6.545	-10.47	6.028e-06	0.0008428
Slc22a8	1.312	9.82	10.45	6.109e-06	0.000845
Igsf5	1.797	5.054	10.35	6.556e-06	0.0008972
Rgs12	1.112	7.174	10.25	7.072e-06	0.0009455
Mob2	-1.381	6.342	-10.2	7.298e-06	0.0009584
Apba1	-1.852	4.206	-10.11	7.838e-06	0.0009622
Tnfsf12	-1.57	4.413	-10.09	7.944e-06	0.0009622
Ephx1	-1.309	7.348	-10.19	7.386e-06	0.0009603
C1qtnf9	-2.274	3.623	-10.24	7.127e-06	0.0009455
Cdh13	-2.211	4.612	-10.07	8.069e-06	0.0009622
Sorbs1	-1.324	7.87	-10.14	7.65e-06	0.0009622
Sept6	-1.836	4.168	-10.04	8.237e-06	0.0009622
Lmnb1	2.404	4.679	10.03	8.313e-06	0.0009622
Ddah1	1.197	7.13	10.13	7.684e-06	0.0009622
Asph	-1.567	5.574	-10.05	8.186e-06	0.0009622
Ces2g	-2.35	2.952	-10.55	5.685e-06	0.000824
Kcp	2.91	5.041	9.99	8.558e-06	0.0009622
Olfr558	-2.904	5.54	-9.995	8.521e-06	0.0009622
Slit3	-2.22	4.394	-9.976	8.648e-06	0.0009622
Ldb2	-1.987	4.062	-9.997	8.508e-06	0.0009622
Cbx7	-1.669	4.45	-9.963	8.733e-06	0.0009622
Nid2	1.244	7.029	10.08	8.018e-06	0.0009622
Fam129a	1.723	7.042	10.06	8.122e-06	0.0009622
Rcn3	-1.763	6.16	-9.979	8.625e-06	0.0009622
Tmsb10	1.681	8.943	10.01	8.441e-06	0.0009622
Mfsd2a	1.959	8.42	9.947	8.835e-06	0.0009654
Bcam	-1.268	9.599	-9.906	9.113e-06	0.0009792
Cytl1	-3.479	4.324	-9.832	9.637e-06	0.0009945
Nos1	-2.089	6.623	-9.868	9.374e-06	0.0009799
Rbm24	-2.744	2.794	-10.53	5.765e-06	0.000824
Ogfr	1.115	6.498	9.816	9.756e-06	0.0009982
Rbpms2	-2.613	4.396	-9.699	1.066e-05	0.001044
Mustn1	-2.144	5.482	-9.676	1.086e-05	0.001048
5430416O09Rik	-1.32	5.014	-9.647	1.11e-05	0.001048
Lgalsl	-1.204	6.536	-9.74	1.033e-05	0.001033
Kcnj12	-2.419	3.404	-9.796	9.904e-06	0.0009982
Ppard	1.17	7.048	9.712	1.056e-05	0.001044
Vegfc	-1.503	5.719	-9.635	1.12e-05	0.001048
Klhl6	1.644	5.619	9.61	1.142e-05	0.00106
Thbd	-1.162	8.067	-9.697	1.068e-05	0.001044
Crip1	-2.249	6.963	-9.665	1.094e-05	0.001048
Stmn2	-2.23	6.546	-9.649	1.108e-05	0.001048
Pvrl2	1.649	5.412	9.563	1.185e-05	0.001077
Lcorl	1.021	5.719	9.558	1.189e-05	0.001077
Bmx	-2.051	6.693	-9.575	1.173e-05	0.001077
Scara3	-2.31	3.726	-9.514	1.23e-05	0.001096
Fgfr3	-1.813	3.806	-9.473	1.27e-05	0.001103
Gm6548	1.144	4.35	9.422	1.322e-05	0.001119
Cacna1h	-2.437	4.634	-9.42	1.324e-05	0.001119
Crebl2	-1.17	4.399	-9.421	1.323e-05	0.001119
Eif2ak2	1.282	7.106	9.554	1.193e-05	0.001077
Crim1	-1.191	8.197	-9.52	1.224e-05	0.001096
Cdkn2b	2.17	5.031	9.358	1.39e-05	0.001121
Slc3a2	1.293	9.448	9.47	1.273e-05	0.001103
Sema3f	-1.651	5.597	-9.403	1.342e-05	0.001119
Ddx58	1.052	7.175	9.482	1.261e-05	0.001103
Perp	-2.504	6.129	-9.361	1.387e-05	0.001121
Ddr2	-1.743	5.97	-9.347	1.403e-05	0.001121
Akap6	-2.272	3.688	-9.304	1.451e-05	0.001143
Ctnna3	-2.438	2.506	-9.964	8.723e-06	0.0009622
Slc43a2	1.36	6.176	9.335	1.416e-05	0.001123
Prcp	1.54	6.442	9.344	1.406e-05	0.001121
Alpl	-2.218	8.155	-9.358	1.391e-05	0.001121
Adamts9	2.045	4.72	9.175	1.608e-05	0.001215
Cpm	-1.266	4.617	-9.161	1.626e-05	0.001215
Abcg1	2.503	6.347	9.239	1.529e-05	0.001183
Lmo7	-1.519	6.911	-9.286	1.472e-05	0.001153
Abr	-1.011	7.44	-9.277	1.483e-05	0.001155
Kcnk3	-2.332	4.159	-9.111	1.694e-05	0.001245
Olfr78	-2.352	2.973	-9.387	1.359e-05	0.001119
Exoc3l	1.826	4.82	9.081	1.735e-05	0.001252
Pla2g6	1.328	4.613	9.056	1.771e-05	0.001254
Zc2hc1a	-1.64	5.418	-9.11	1.695e-05	0.001245
Ly75	1.659	6.65	9.162	1.625e-05	0.001215
Atp1b2	-1.812	8.363	-9.172	1.612e-05	0.001215
Fam101b	1.423	9.039	9.171	1.615e-05	0.001215
Stra6	2.609	5.98	9.071	1.75e-05	0.001252
Megf9	-1.057	4.619	-9.02	1.824e-05	0.001254
Vamp2	-1.162	5.583	-9.086	1.728e-05	0.001252
Odc1	2.014	5.902	9.069	1.752e-05	0.001252
Mmp15	1.116	7.626	9.095	1.716e-05	0.001252
Lrp4	1.793	5.279	8.921	1.979e-05	0.001307
Spock2	1.361	12.34	8.956	1.922e-05	0.001295
Alad	1.065	6.646	9.02	1.824e-05	0.001254
Chd7	1.19	5.02	8.895	2.021e-05	0.001314
Tdrp	1.082	8.133	9.032	1.806e-05	0.001254
Fam171a2	1.588	5.022	8.879	2.047e-05	0.001318
Gja4	-1.444	7.318	-9.014	1.833e-05	0.001254
Oas1a	2.022	5.838	8.919	1.981e-05	0.001307
Dgkb	-2.762	5.075	-8.84	2.114e-05	0.001328
Dok4	1.306	7.005	8.992	1.867e-05	0.001264
Epb4.1l4a	-1.907	2.812	-9.045	1.787e-05	0.001254
Chst1	2.533	3.505	8.945	1.939e-05	0.001299
Mrvi1	-2.482	6.309	-8.865	2.072e-05	0.001321
Nid1	1.413	9.059	8.897	2.017e-05	0.001314
Ncaph	2.237	4.827	8.72	2.338e-05	0.001427
Kcna5	-1.52	4.234	-8.707	2.363e-05	0.001436
Fam198b	-1.105	4.508	-8.72	2.337e-05	0.001427
Tfrc	1.699	8.681	8.882	2.042e-05	0.001318
Fhl3	1.499	4.643	8.698	2.381e-05	0.001437
Mitd1	1.426	4.352	8.673	2.431e-05	0.001449
Ppp1r12c	-1.046	7.266	-8.857	2.086e-05	0.001323
Nox4	3.219	2.874	9.389	1.357e-05	0.001119
Gja5	-1.907	5.933	-8.747	2.286e-05	0.001415
Gpr21	-2.909	2.255	-9.484	1.259e-05	0.001103
Ltbp1	-2.526	6.1	-8.721	2.336e-05	0.001427
Tcaf2	1.077	5.42	8.695	2.387e-05	0.001437
Grap	1.165	8.112	8.77	2.242e-05	0.001402
6330403A02Rik	-2.731	4.806	-8.579	2.632e-05	0.001476
Scn4b	-3.378	4.462	-8.529	2.747e-05	0.001476
Chst2	1.843	5.816	8.639	2.502e-05	0.001455
Memo1	1.061	4.69	8.555	2.687e-05	0.001476
Synpo	-1.672	6.541	-8.686	2.405e-05	0.001441
Tmem154	1.175	4.32	8.517	2.775e-05	0.001476
Lifr	-1.103	5.517	-8.624	2.534e-05	0.001455
P3h2	-1.87	3.929	-8.503	2.808e-05	0.001476
Tcf19	1.905	3.538	8.553	2.692e-05	0.001476
Foxd1	-1.938	3.407	-8.542	2.717e-05	0.001476
Ctsw	4.526	3.181	9.635	1.12e-05	0.001048
Ifi44	3.048	6.869	8.642	2.495e-05	0.001455
Hrc	-2.345	3.837	-8.504	2.807e-05	0.001476
Cdh2	1.633	6.368	8.653	2.473e-05	0.001455
D17H6S56E-5	3.494	4.636	8.475	2.876e-05	0.001476
Pgf	-1.572	4.435	-8.475	2.877e-05	0.001476
Pi16	-2.933	3.967	-8.468	2.895e-05	0.001476
Tubb4b	1.34	6.557	8.63	2.521e-05	0.001455
Palld	-2.631	6.262	-8.581	2.629e-05	0.001476
Plod1	1.086	8.341	8.648	2.483e-05	0.001455
Reck	-1.582	6.739	-8.621	2.54e-05	0.001455
Nudt4	-1.336	7.413	-8.628	2.526e-05	0.001455
Tmem200b	-2.195	4.975	-8.45	2.94e-05	0.001476
Map3k7cl	-2.587	5.637	-8.492	2.836e-05	0.001476
Tax1bp3	1.072	5.004	8.462	2.909e-05	0.001476
Timp3	-1.218	10.13	-8.558	2.681e-05	0.001476
Rcan2	-2.488	6.653	-8.543	2.714e-05	0.001476
Amigo2	-1.253	5.028	-8.453	2.933e-05	0.001476
Prr5	2.347	3.514	8.454	2.93e-05	0.001476
Tmem47	-1.356	5.765	-8.502	2.81e-05	0.001476
Zfhx3	-1.394	3.863	-8.348	3.21e-05	0.001563
Olfml2a	-1.734	5.41	-8.442	2.96e-05	0.001476
Def6	1.314	6.344	8.506	2.801e-05	0.001476
Efemp2	-1.226	5.406	-8.44	2.964e-05	0.001476
Hspb7	-2.553	3.625	-8.343	3.225e-05	0.001563
Filip1l	-1.428	7.144	-8.522	2.764e-05	0.001476
Sbspon	-2.101	3.573	-8.329	3.265e-05	0.001567
Map3k5	-1.494	3.928	-8.302	3.342e-05	0.001578
Slc39a8	1.56	8.409	8.513	2.784e-05	0.001476
Fgf11	-1.924	2.886	-8.432	2.985e-05	0.001476
Aprt	1.124	4.67	8.321	3.286e-05	0.001567
B3galnt2	-1.007	4.644	-8.323	3.282e-05	0.001567
Rcsd1	-1.138	6.442	-8.465	2.903e-05	0.001476
Tubb6	3.955	4.629	8.281	3.405e-05	0.001587
Sspn	-2.489	3.963	-8.255	3.484e-05	0.001589
Wasf3	-1.804	3.552	-8.252	3.491e-05	0.001589
Tmem255b	-1.904	2.567	-8.498	2.822e-05	0.001476
St3gal5	1.539	5.261	8.288	3.384e-05	0.001587
S1pr3	-1.719	6.349	-8.368	3.156e-05	0.001543
Ifit3b	2.242	5.611	8.276	3.421e-05	0.001588
Ccnjl	2.456	2.444	8.844	2.108e-05	0.001328
Khdrbs3	-1.402	4.934	-8.251	3.494e-05	0.001589
Trpv2	-1.992	4.234	-8.143	3.844e-05	0.001683
Pqlc3	-2.158	2.808	-8.3	3.349e-05	0.001578
Nkx6-1	-3.008	2.834	-8.398	3.076e-05	0.001509
Cap2	-2.424	4.953	-8.175	3.738e-05	0.00165
St8sia6	-1.35	5.063	-8.213	3.614e-05	0.001615
Lcp1	1.399	6.56	8.32	3.29e-05	0.001567
Jag1	-1.419	7.371	-8.34	3.235e-05	0.001563
Dusp6	1.638	6.648	8.31	3.319e-05	0.001575
Sparc	1.363	12.75	8.23	3.56e-05	0.001602
Prkcb	1.135	5.903	8.251	3.495e-05	0.001589
Gpc3	-2.208	4.276	-8.078	4.073e-05	0.001742
Ifit2	2.941	6.196	8.184	3.707e-05	0.001645
Cmip	-1.166	5.78	-8.219	3.594e-05	0.001612
Synj2	-1.324	4.33	-8.08	4.067e-05	0.001742
Snx21	-1.007	4.283	-8.08	4.067e-05	0.001742
Peg13	-1.024	7.423	-8.281	3.405e-05	0.001587
Megf6	1.78	6.503	8.241	3.524e-05	0.001595
Coro2b	1.113	6.709	8.254	3.487e-05	0.001589
Tbx4	2.172	4.127	7.998	4.378e-05	0.001801
Oasl2	1.827	7.453	8.193	3.677e-05	0.001637
Pde1a	-2.306	4.306	-7.946	4.586e-05	0.001869
Ndnf	1.635	8.387	8.167	3.764e-05	0.001654
L1cam	-1.754	3.9	-7.912	4.73e-05	0.001914
Idh2	-1.141	5.576	-8.06	4.139e-05	0.001753
Wnt5b	-1.433	5.136	-8.003	4.355e-05	0.001797
Plekha5	-1.237	3.505	-7.888	4.836e-05	0.001929
Abcc6	1.305	5.633	8.036	4.23e-05	0.001757
Dnajb2	-1.043	5.652	-8.049	4.178e-05	0.001753
Angptl4	3.023	5.071	7.889	4.829e-05	0.001929
Atp2a2	-1.094	9.333	-8.071	4.099e-05	0.001747
Flot2	-1.74	5.372	-7.975	4.467e-05	0.001832
Rab6b	-1.747	4.231	-7.859	4.965e-05	0.001957
Plcg2	-1.504	6.11	-8.031	4.248e-05	0.001759
Atp2a3	-2.437	8.043	-8.049	4.181e-05	0.001753
Srm	1.12	4.582	7.805	5.213e-05	0.002017
Fam124b	1.703	3.266	7.78	5.335e-05	0.002033
St6galnac6	-1.093	4.913	-7.842	5.04e-05	0.001968
Adgrl3	2.126	4.82	7.77	5.387e-05	0.002036
Pde3a	-2.133	5.629	-7.866	4.934e-05	0.001957
Bambi	1.429	5.645	7.863	4.944e-05	0.001957
Cadps2	-2.076	4.151	-7.715	5.665e-05	0.002129
Dcn	-2.982	6.135	-7.855	4.982e-05	0.001957
Adamtsl1	-2.641	5.225	-7.777	5.351e-05	0.002033
Slc5a6	1.439	7.104	7.916	4.714e-05	0.001914
Cdc42bpg	-1.185	4.182	-7.677	5.872e-05	0.002181
Tmem252	2.28	6.512	7.845	5.026e-05	0.001968
Ctla2a	2.458	8.748	7.888	4.835e-05	0.001929
Ppp1r12b	-2.475	4.235	-7.645	6.044e-05	0.00222
Usp18	2.013	5.946	7.79	5.29e-05	0.002029
Arhgap18	1.366	6.275	7.834	5.078e-05	0.001977
Frk	-1.696	4.114	-7.635	6.106e-05	0.00223
Rasgrf2	-3.144	3.166	-7.685	5.827e-05	0.002171
Map7	1.68	5.108	7.687	5.814e-05	0.002171
Crispld1	-1.481	6.134	-7.774	5.364e-05	0.002033
Pacsin3	-1.729	3.206	-7.569	6.492e-05	0.002285
Ntrk3	-2.307	2.855	-7.638	6.088e-05	0.00223
Krt222	1.466	3.007	7.599	6.31e-05	0.002254
Mgat3	-2.314	4.635	-7.585	6.395e-05	0.002266
Tgfb3	-1.698	4.686	-7.606	6.269e-05	0.002254
Jag2	-1.082	8.257	-7.79	5.289e-05	0.002029
Ppl	-2.621	1.577	-8.435	2.979e-05	0.001476
Ccdc109b	-1.577	3.234	-7.528	6.748e-05	0.002332
Gigyf1	-1.135	4.485	-7.534	6.708e-05	0.002326
Kcnq1	1.163	5.913	7.666	5.931e-05	0.002197
Isg15	1.985	6.725	7.693	5.782e-05	0.002166
Ar	-1.881	2.623	-7.559	6.556e-05	0.002285
Dgkg	-2.738	4.267	-7.454	7.237e-05	0.002441
Adgrg3	2.581	2.939	7.601	6.3e-05	0.002254
Nrip2	-2.455	5.993	-7.618	6.204e-05	0.002247
Cacna2d1	-2.679	4.197	-7.429	7.415e-05	0.002466
Tm4sf1	-1.15	9.384	-7.652	6.005e-05	0.002212
Stx1a	2.024	2.722	7.556	6.575e-05	0.002286
Srl	-2.559	3.869	-7.396	7.652e-05	0.002496
Antxr1	-1.278	6.205	-7.604	6.285e-05	0.002254
Ppp1r3c	-2.335	4.084	-7.38	7.771e-05	0.002501
Aldh18a1	1.085	4.979	7.477	7.082e-05	0.00241
Ankrd50	-1.113	5.755	-7.563	6.531e-05	0.002285
Slc27a3	-1.915	2.781	-7.4	7.625e-05	0.002496
Adcy5	-2.53	5.176	-7.435	7.369e-05	0.002457
Ppp1r14a	-2.11	4.192	-7.347	8.017e-05	0.002542
Pmepa1	1.319	7.156	7.591	6.362e-05	0.00226
Rasgrp2	-1.484	4.907	-7.421	7.467e-05	0.002477
Tspan7	-1.646	5.43	-7.45	7.266e-05	0.002441
Slc7a1	1.779	9.979	7.526	6.761e-05	0.002332
Sp100	1.125	7.435	7.562	6.535e-05	0.002285
Hrct1	-1.302	4.71	-7.359	7.929e-05	0.002533
Pgm1	1.051	6.167	7.488	7.01e-05	0.0024
Dhx58	1.881	4.878	7.316	8.262e-05	0.002595
Thsd4	-2.065	4.938	-7.334	8.117e-05	0.002566
Cd3eap	1.033	4.384	7.289	8.484e-05	0.00264
Efna5	-2.349	2.591	-7.349	8.007e-05	0.002542
Col4a6	-2.511	2.859	-7.285	8.51e-05	0.00264
C1qtnf2	-2.269	2.599	-7.319	8.24e-05	0.002594
Farp1	-1.304	6.052	-7.444	7.311e-05	0.002444
Mylk	-2.232	9.124	-7.456	7.228e-05	0.002441
Prex1	1.166	7.409	7.481	7.053e-05	0.002407
Ano1	-2.339	6.369	-7.417	7.497e-05	0.00248
Prkar1b	-1.709	4.278	-7.23	8.985e-05	0.002686
Taf1a	-1.383	3.242	-7.178	9.453e-05	0.002793
Marveld1	-1.705	7.357	-7.446	7.297e-05	0.002444
Tspan18	1.359	6.288	7.411	7.545e-05	0.002483
Itpk1	-1.585	5.816	-7.371	7.835e-05	0.002511
Arhgap10	-1.249	4.932	-7.283	8.527e-05	0.00264
Zfp521	1.319	4.891	7.254	8.773e-05	0.002657
Gucy1a2	-2.113	4.082	-7.158	9.634e-05	0.002815
Bak1	1.003	6.336	7.385	7.733e-05	0.002499
Tbx18	-2.214	3.339	-7.123	9.969e-05	0.002874
Mki67	4.74	4.335	7.168	9.54e-05	0.002796
Rgs7bp	-2.326	5.206	-7.253	8.778e-05	0.002657
Setbp1	-1.631	3.544	-7.103	0.0001017	0.002918
Sgip1	-2.175	2.712	-7.169	9.533e-05	0.002796
Kazald1	-3.308	2.325	-7.404	7.594e-05	0.002493
Ism1	1.197	5.326	7.262	8.704e-05	0.002657
Olfml2b	-2.133	3.265	-7.095	0.0001025	0.002937
Parm1	-2.24	4.719	-7.12	0.0001001	0.002879
Prkg1	-1.243	5.81	-7.253	8.779e-05	0.002657
Slc16a9	1.144	6.481	7.275	8.597e-05	0.002649
Rgl1	1.19	6.704	7.285	8.512e-05	0.00264
Bok	1.204	5.591	7.202	9.229e-05	0.002746
Kpna2	1.24	4.302	7.037	0.0001086	0.00304
Nckap5	-1.796	3.235	-6.977	0.0001153	0.003129
Mical2	-2.584	4.159	-6.996	0.0001131	0.003083
Slfn9	3.301	2.993	7.149	9.721e-05	0.002828
Eps8l2	-1.809	7.317	-7.252	8.788e-05	0.002657
Gjb2	-2.247	1.933	-7.264	8.686e-05	0.002657
Tmod2	-1.248	4.581	-7.055	0.0001067	0.00301
Mcm2	1.082	4.812	7.073	0.0001048	0.002981
Sfxn3	-1.276	6.114	-7.187	9.37e-05	0.002775
Cmtm3	1.15	5.09	7.062	0.0001059	0.003001
Gucy2g	-3.358	1.894	-7.388	7.711e-05	0.002499
Syne3	-1.587	2.191	-7.02	0.0001104	0.003059
Mcm5	1.738	4.619	6.966	0.0001166	0.003151
Hdac11	-2.08	4.505	-6.944	0.0001192	0.003189
Cd40	1.371	5.124	7.01	0.0001115	0.003059
Cnn1	-3.256	3.368	-6.853	0.0001307	0.003344
Rhpn2	-1.432	5.165	-7.01	0.0001115	0.003059
Trpm6	1.058	5.237	7.012	0.0001113	0.003059
Tspan6	1.214	5.718	7.048	0.0001074	0.003023
Aldh1a2	-2.232	2.474	-6.909	0.0001234	0.003261
Pde10a	1.66	2.755	6.86	0.0001297	0.003342
Arhgap28	1.404	3.461	6.806	0.000137	0.003453
Ntn4	-2.197	6.732	-7.077	0.0001044	0.002975
Lrrc75a	-1.311	3.517	-6.803	0.0001374	0.003456
Tub	-1.583	2.965	-6.787	0.0001396	0.003498
Slc22a23	1.388	4.03	6.815	0.0001358	0.003436
Filip1	-1.171	6.24	-7.056	0.0001065	0.00301
Jph2	-2.464	5.074	-6.903	0.0001242	0.003276
Phtf2	-1.136	3.782	-6.798	0.0001381	0.003466
Wtip	-1.867	6.496	-7.039	0.0001084	0.00304
Ptprj	-1.972	4.817	-6.868	0.0001287	0.003333
Mmp25	2.26	4.336	6.773	0.0001417	0.00353
Mycl	1.669	2.83	6.77	0.0001422	0.00353
Rps6ka5	-1.221	3.711	-6.758	0.0001439	0.00353
Slc16a7	-2.306	1.56	-7.197	9.272e-05	0.002752
Stim1	-1.025	6.218	-7.015	0.000111	0.003059
Shtn1	-1.909	3.258	-6.722	0.0001493	0.003623
Synpo2	-2.065	5.29	-6.899	0.0001246	0.00328
Dmp1	-2.336	1.827	-7.024	0.00011	0.003055
Sox4	1.691	5.78	6.94	0.0001197	0.003189
Dck	1.211	3.782	6.728	0.0001483	0.003612
Gpr153	-1.856	3.601	-6.709	0.0001513	0.003637
Gda	-1.748	3.341	-6.688	0.0001547	0.003678
Tbx2	-2.257	5.507	-6.882	0.0001269	0.003319
Fam120aos	-1.049	3.557	-6.695	0.0001535	0.003663
E2f2	2.127	2.597	6.778	0.000141	0.003526
Fam43a	1.284	6.736	6.977	0.0001152	0.003129
Glce	-1.047	5.168	-6.855	0.0001303	0.003343
Pou2f3	-2.504	1.861	-6.947	0.0001189	0.003187
Gpr20	-2.74	4.152	-6.669	0.0001577	0.0037
Slc7a5	1.56	9.926	6.928	0.000121	0.003219
Cry2	-1.282	3.44	-6.638	0.0001628	0.003759
Prune2	-2.123	3.738	-6.642	0.0001622	0.003759
Cacna1g	-2.171	3.268	-6.623	0.0001655	0.00377
Fbxo32	-1.373	4.902	-6.76	0.0001437	0.00353
Hspb2	-2.453	2.801	-6.619	0.0001661	0.00377
Col4a2	1.4	11.49	6.838	0.0001326	0.003388
Casq2	-2.011	6.894	-6.876	0.0001277	0.00332
Fmo5	-1.199	4.815	-6.722	0.0001494	0.003623
Hey2	-2.104	5.145	-6.716	0.0001503	0.003637
Tlr3	1.007	6.241	6.831	0.0001336	0.0034
Cped1	-2.668	4.364	-6.588	0.0001716	0.003854
Itpr3	-1.094	7.667	-6.857	0.00013	0.003342
Pitpnm3	-2.196	2.838	-6.529	0.0001824	0.003985
Dock10	-1.616	5.038	-6.695	0.0001536	0.003663
Cys1	-2.074	2.104	-6.643	0.000162	0.003759
Fam110b	-1.737	2.273	-6.583	0.0001724	0.003854
Lama3	-1.384	5.682	-6.76	0.0001436	0.00353
Dzip1	-1.705	2.224	-6.583	0.0001724	0.003854
Tox2	-1.998	1.57	-6.827	0.0001341	0.003405
Cacnb2	-2.2	3.121	-6.495	0.0001892	0.004046
Naalad2	-1.491	5.01	-6.674	0.0001568	0.003694
Asap3	1.438	5.024	6.661	0.0001589	0.003714
Timp2	-1.545	7.77	-6.819	0.0001352	0.003426
Susd5	-3.169	4.771	-6.571	0.0001747	0.003882
Parp8	-1.377	3.195	-6.477	0.0001927	0.004087
Osbpl5	-1.641	4.802	-6.621	0.0001657	0.00377
Gmpr	1.16	5.606	6.712	0.0001509	0.003637
Vwa1	1.114	10.44	6.75	0.0001451	0.003553
Klk8	1.061	4.033	6.515	0.0001853	0.004022
Col4a1	1.275	11.83	6.71	0.0001512	0.003637
Mfsd6	-1.105	5.732	-6.711	0.0001509	0.003637
Gpsm2	2.036	2.881	6.471	0.000194	0.004095
Cdk14	-1.494	4.863	-6.609	0.0001678	0.003794
Smad6	-1.228	6.164	-6.736	0.0001472	0.003598
Lox	-2.133	5.371	-6.639	0.0001628	0.003759
Crtc3	-1.078	5.777	-6.703	0.0001522	0.003652
C77370	1.073	3.818	6.46	0.0001963	0.004122
Nos2	1.567	5.349	6.621	0.0001657	0.00377
Foxs1	-2.07	3.954	-6.443	0.0001999	0.004179
Frzb	2.338	1.491	7.036	0.0001087	0.00304
Mctp1	-1.86	1.807	-6.58	0.000173	0.003857
Dact3	-1.685	2.667	-6.388	0.0002119	0.004312
Ptrf	-1.37	9.996	-6.671	0.0001574	0.0037
Pcdh12	1.674	6.516	6.666	0.0001583	0.003708
Hspa12a	-2.198	4.93	-6.506	0.000187	0.004034
Tab1	-1.152	4.68	-6.505	0.0001871	0.004034
Ctdspl	-1.972	4.884	-6.504	0.0001874	0.004035
Mfap4	-2.506	2.586	-6.378	0.0002141	0.004337
Reep1	1.704	6.05	6.619	0.0001661	0.00377
Ttyh3	1.156	6.325	6.646	0.0001615	0.003757
Tmem100	-1.676	3.967	-6.39	0.0002114	0.004312
Fbln5	-2.028	7.952	-6.661	0.0001591	0.003714
Mypop	-1.04	3.412	-6.343	0.0002222	0.004404
Ggt5	-1.726	4.682	-6.467	0.0001948	0.004105
Rasl11a	-1.881	2.842	-6.323	0.0002271	0.004433
Rtn4rl1	-1.654	4	-6.382	0.0002133	0.004334
Nbl1	-1.584	6.554	-6.623	0.0001654	0.00377
B3galnt1	-1.221	3.731	-6.34	0.000223	0.004404
Slc40a1	1.206	9.468	6.619	0.0001661	0.00377
C1qtnf1	-1.355	5.033	-6.485	0.0001911	0.004067
Unc13c	-2.133	2.697	-6.294	0.0002344	0.004465
Ncapd2	1.276	3.991	6.338	0.0002236	0.004404
Ptgfrn	1.101	8.142	6.63	0.0001643	0.00377
Insc	-2.044	3.502	-6.283	0.0002372	0.004482
Ifih1	1.068	7.213	6.615	0.0001668	0.003779
Slc4a3	-1.982	4.676	-6.39	0.0002114	0.004312
Rnf144a	-1.002	4.673	-6.413	0.0002063	0.004245
Obscn	-2.163	1.994	-6.369	0.0002162	0.004365
Racgap1	2.003	3.792	6.259	0.0002435	0.00451
Pdlim3	-2.693	4.386	-6.316	0.0002289	0.004444
Adamts12	2.154	3.676	6.243	0.0002477	0.004546
Lypd1	-2.229	3.35	-6.234	0.0002501	0.004553
Flt4	1.093	8.239	6.585	0.0001721	0.003854
Adamts15	-2.721	3.904	-6.252	0.0002452	0.004522
Isg20	2.624	4.549	6.288	0.0002359	0.00447
Oas2	2.414	4.589	6.299	0.0002331	0.004465
Pln	-3.39	6.72	-6.497	0.0001887	0.004046
Nipal2	-1.283	4.178	-6.313	0.0002296	0.004444
Dzip1l	-1.915	2.295	-6.24	0.0002486	0.004546
Col28a1	-2.289	2.922	-6.187	0.0002632	0.004704
Asb2	-2.754	4.763	-6.293	0.0002345	0.004465
Kctd15	-2.241	1.853	-6.313	0.0002297	0.004444
Jam3	-1.356	5.537	-6.414	0.0002061	0.004245
P2rx1	-2.713	3.582	-6.153	0.0002732	0.004743
Cav1	-1.372	9.342	-6.476	0.0001931	0.004088
Myom1	-2.021	5.126	-6.345	0.0002218	0.004404
Lmo2	1.073	8.187	6.507	0.0001867	0.004034
Cenpf	3.89	2.687	6.348	0.0002211	0.004404
Pde5a	-1.946	7.058	-6.456	0.000197	0.004132
Cdca7l	1.261	3.457	6.13	0.0002802	0.004792
Zfp385c	-3.507	0.6148	-7.333	8.13e-05	0.002566
Txlnb	-1.874	1.793	-6.254	0.0002446	0.004521
Fam212b	-1.612	3.895	-6.171	0.0002679	0.004724
Foxm1	2.476	2.865	6.131	0.0002797	0.004792
Cdc42ep5	-1.041	3.153	-6.114	0.0002851	0.004801
Gpr85	1.78	2.64	6.125	0.0002815	0.004794
Pth1r	-1.772	5.361	-6.34	0.000223	0.004404
Rhbdl2	3.497	1.731	6.759	0.0001438	0.00353
Mex3a	2.93	1.581	6.686	0.000155	0.003678
Slc2a4	-2.446	3.844	-6.129	0.0002804	0.004792
Sstr4	-1.952	2.363	-6.117	0.0002841	0.004801
Dcdc2a	-1.908	3.054	-6.087	0.0002936	0.004876
Kalrn	-1.262	4.522	-6.24	0.0002484	0.004546
Tpm1	-1.238	9.336	-6.42	0.0002048	0.004244
Fzd2	-2.36	2.818	-6.077	0.0002971	0.004902
Dmd	-1.588	5.979	-6.374	0.0002152	0.004351
Stap2	1.143	4.999	6.271	0.0002403	0.004509
Tmeff1	-1.199	5.427	-6.328	0.0002258	0.004422
Slc6a13	-2.745	3.29	-6.057	0.0003036	0.004965
Tinagl1	-1.348	8.089	-6.415	0.0002058	0.004245
Slc8a1	-1.915	4.858	-6.228	0.0002516	0.004569
Ap1s3	3.055	1.069	7.124	9.965e-05	0.002874
Enpep	-1.853	5.638	-6.31	0.0002303	0.004448
Rrm2	3.724	2.41	6.309	0.0002306	0.004448
Cdo1	1.506	2.118	6.111	0.000286	0.004805
Nexn	-2.483	4.098	-6.087	0.0002936	0.004876
Nuf2	3.477	1.889	6.528	0.0001827	0.003985
Arhgap44	-1.885	2.995	-6.016	0.0003177	0.005106
Tns1	-1.174	9.897	-6.344	0.0002221	0.004404
Serpinh1	1.001	9.391	6.36	0.0002184	0.00439
Smarcd3	-2.02	4.527	-6.145	0.0002755	0.004764
Itga7	-2.285	6.847	-6.342	0.0002226	0.004404
Cpe	1.311	9.395	6.354	0.0002197	0.004401
Syt7	-1.267	6.265	-6.334	0.0002246	0.004417
Prc1	3.43	3.384	6.01	0.0003199	0.005125
Emp2	-1.288	8.101	-6.358	0.0002188	0.00439
Bst2	2.033	7.038	6.332	0.000225	0.004417
Endod1	-1.342	7.347	-6.339	0.0002233	0.004404
Adamtsl5	-2.153	2.778	-5.96	0.0003381	0.005242
Fam57b	1.36	2.826	5.957	0.0003395	0.005245
Ndrg1	-1.576	9.21	-6.298	0.0002334	0.004465
Fndc1	3.688	2.275	6.261	0.0002429	0.00451
Ndc80	1.902	2.053	6.064	0.0003011	0.004932
Hells	1.264	3.32	5.945	0.0003441	0.005269
Eml1	-1.121	6.856	-6.296	0.0002339	0.004465
Arhgef17	-2.187	6.346	-6.245	0.000247	0.004546
Sept5	-1.088	5.27	-6.182	0.0002646	0.00472
Inpp4b	-2.015	6.74	-6.264	0.0002421	0.004509
Myocd	-2.324	1.651	-6.095	0.0002912	0.004848
Tmsb4x	1.027	11.61	6.211	0.0002564	0.004642
Plekha6	-1.534	4.095	-6.011	0.0003196	0.005125
Hist2h2be	-1.201	4.05	-6.009	0.0003201	0.005125
Fgf1	-2.547	5.5	-6.138	0.0002776	0.004788
Fn1	1.247	12.56	6.172	0.0002676	0.004724
Nuak1	-1.343	6.248	-6.233	0.0002504	0.004553
Cacna1c	-2.05	4.196	-5.986	0.0003287	0.005186
Gfra2	-2.117	4.178	-5.98	0.0003309	0.005195
Ppfibp2	-1.899	3.822	-5.945	0.0003438	0.005269
Kif22	3.145	2.036	6.153	0.0002732	0.004743
Tpx2	2.789	3.479	5.867	0.0003758	0.005513
Top2a	4.436	3.895	5.874	0.0003724	0.005509
Nusap1	2.608	3.133	5.866	0.0003761	0.005513
Nsg2	-1.574	4.895	-6.069	0.0002995	0.004932
St5	-1.007	5.774	-6.171	0.0002678	0.004724
Fkbp5	2.08	3.587	5.867	0.0003757	0.005513
Dgkh	1.006	4.364	5.992	0.0003262	0.005167
Itga9	-1.367	5.413	-6.121	0.0002828	0.004794
Gucy1b3	-2.099	6.794	-6.194	0.0002611	0.004696
Tpm2	-2.628	7.731	-6.195	0.0002609	0.004696
Zic4	-1.623	2.877	-5.833	0.0003905	0.005616
Mrgprf	-2.325	4.128	-5.912	0.0003569	0.005401
Ldb3	-2.86	3.178	-5.822	0.0003952	0.005657
Asns	1.575	4.782	5.995	0.0003251	0.005162
Kbtbd11	1.407	7.596	6.207	0.0002576	0.004658
Ajap1	-2.452	1.582	-5.999	0.0003239	0.005161
Grem2	-2.233	4.817	-5.985	0.0003291	0.005186
Hmgb2	1.459	4.407	5.936	0.0003476	0.005317
Prkaa2	-2.298	3.264	-5.807	0.000402	0.005737
Hlf	-1.718	4.329	-5.931	0.0003493	0.005329
Arhgef25	-1.998	4.435	-5.93	0.0003498	0.005329
Lhfp	-1.454	6.081	-6.118	0.0002838	0.004801
Kcnj15	2.331	2.163	5.89	0.0003661	0.005465
B3gnt9	-1.84	2.328	-5.794	0.0004079	0.005783
Ecm1	1.313	7.837	6.172	0.0002675	0.004724
Myzap	-1.855	2.953	-5.775	0.0004169	0.005854
Plekha7	1.425	2.315	5.798	0.0004061	0.005778
Twist1	-1.85	1.842	-5.85	0.000383	0.005577
Ndufa4l2	-1.912	5.536	-6.043	0.0003085	0.005033
Itih2	-2.554	3.448	-5.778	0.0004157	0.005846
Spsb1	1.746	4.1	5.839	0.0003875	0.005585
Slc2a10	-1.557	3.346	-5.777	0.0004159	0.005846
Shmt1	2.977	1.472	6.266	0.0002416	0.004509
Pcsk5	-2.264	3.366	-5.755	0.0004265	0.005916
Mef2c	-1.245	7.248	-6.125	0.0002815	0.004794
Higd1b	-1.622	5.94	-6.064	0.0003011	0.004932
Ngb	-2.377	1.262	-6.023	0.0003154	0.005082
Rab27a	-1.149	4.274	-5.886	0.0003675	0.005473
Plcd1	-1.097	3.454	-5.784	0.0004129	0.005823
Lgals9	1.445	8.45	6.123	0.0002824	0.004794
Adap2	-1.593	4.347	-5.878	0.0003711	0.005501
Zic1	-1.484	4.906	-5.952	0.0003414	0.005259
Rasgef1a	-1.706	1.609	-5.846	0.0003845	0.005579
Ercc6l	2.751	1.432	6.157	0.0002719	0.004743
Gcnt1	-2.081	2.6	-5.717	0.0004456	0.006042
Des	-2.341	6.723	-6.066	0.0003007	0.004932
Atoh8	-1.058	3.528	-5.766	0.0004215	0.005897
Cabp1	-1.978	2.059	-5.745	0.0004317	0.005939
Nmi	1.009	5.832	6.003	0.0003225	0.005151
Ston1	-1.3	4.639	-5.87	0.0003742	0.005513
Cdt1	1.68	2.069	5.737	0.0004358	0.005967
Heyl	-2.299	5.892	-5.97	0.0003344	0.005208
Lrrc10b	-2.803	2.832	-5.66	0.0004762	0.006316
Cdk1	4.613	2.41	6.019	0.0003166	0.005095
Lmod1	-2.747	5.726	-5.928	0.0003505	0.005329
Tbx15	-2.356	1.879	-5.726	0.0004409	0.005997
Vash1	1.728	6.866	6.026	0.0003143	0.005076
Fstl3	-1.913	2.433	-5.649	0.0004818	0.006354
Slc43a3	2.706	3.721	5.659	0.0004766	0.006316
Clmp	-2.266	2.306	-5.658	0.000477	0.006316
Rgs6	-1.592	3.529	-5.685	0.0004622	0.006201
Itga8	-2.206	5.383	-5.896	0.0003634	0.005445
Sgtb	-1.124	3.462	-5.686	0.0004616	0.0062
Emp1	-1.232	7.218	-6.026	0.0003142	0.005076
AW549542	-2.523	1.34	-5.866	0.000376	0.005513
Gdf11	-1.707	2.287	-5.636	0.0004894	0.006426
Colec12	-1.394	5.957	-5.967	0.0003357	0.005222
Serpinf1	-1.653	3.821	-5.709	0.0004498	0.006081
Arap1	-1.097	4.846	-5.852	0.000382	0.005577
Sybu	-2.223	1.141	-5.896	0.0003635	0.005445
Fbxl22	-2.555	2.599	-5.61	0.0005046	0.006509
Cox4i2	-1.728	4.18	-5.733	0.0004376	0.00597
Ncs1	-1.99	3.216	-5.614	0.0005019	0.006493
Gpc4	-1.59	4.429	-5.762	0.0004231	0.005898
F13a1	-2.864	2.784	-5.592	0.0005149	0.006583
Gypc	-1.685	3.383	-5.626	0.000495	0.006449
Src	1.273	5.181	5.844	0.0003854	0.00558
Dnajb5	1.05	5.169	5.84	0.0003871	0.005585
Zak	-1.729	5.157	-5.831	0.0003913	0.005622
Kcnmb1	-2.29	5.728	-5.871	0.000374	0.005513
Klhl38	-2.83	0.7271	-6.115	0.0002847	0.004801
Specc1	-1.156	5.284	-5.851	0.0003826	0.005577
Hdac9	-1.149	3.343	-5.602	0.0005091	0.006554
Chek1	3.107	0.7723	6.578	0.0001734	0.003861
Kif11	3.739	2.061	5.845	0.0003849	0.005579
9230112J17Rik	-2.473	2.046	-5.601	0.00051	0.006559
Mdfi	3.312	0.9201	6.547	0.000179	0.003952
Nr2f1	-1.345	3.662	-5.627	0.0004945	0.006449
Tead3	-2.166	2.998	-5.549	0.000542	0.006789
Lum	-2.427	3.208	-5.556	0.0005371	0.006747
Slc38a11	-2.527	3.609	-5.582	0.0005213	0.006632
Speg	-1.44	3.908	-5.648	0.0004825	0.006356
Tmcc2	-1.205	4.936	-5.784	0.0004127	0.005823
Sox13	-1.051	7.147	-5.934	0.0003484	0.005323
Uck2	1.067	3.67	5.599	0.0005109	0.006564
C4b	2.813	5.534	5.751	0.0004288	0.005931
Sgca	-2.283	2.827	-5.524	0.0005579	0.006921
P4ha2	-1.168	4.136	-5.666	0.0004729	0.006287
Tmie	-1.166	2.809	-5.525	0.0005569	0.006921
Slc6a6	-1.07	10.69	-5.866	0.0003758	0.005513
Eva1c	-1.431	2.496	-5.512	0.0005657	0.006991
Enc1	1.898	6.857	5.894	0.0003644	0.005446
Lpl	-1.202	4.751	-5.735	0.0004363	0.005967
Slc8a2	-1.992	4.314	-5.646	0.0004835	0.006363
Slc16a1	1.943	9.753	5.882	0.0003693	0.005481
Nek6	1.051	4.779	5.72	0.000444	0.006026
Dusp23	1.009	3.689	5.567	0.0005303	0.006701
Prickle2	-1.251	4.418	-5.669	0.0004709	0.006266
Rinl	1.014	3.428	5.529	0.0005549	0.006917
Ogn	-2.56	5.164	-5.706	0.0004511	0.006084
Tesc	-1.697	3.669	-5.544	0.0005448	0.006818
Lbh	-2.083	7.387	-5.863	0.0003771	0.005522
Nr3c2	-1.365	4.188	-5.617	0.0005001	0.006483
Stac	-2.125	1.017	-5.741	0.0004335	0.005951
Chn1	-1.207	4.458	-5.651	0.0004809	0.006348
Gfap	3.293	6.192	5.735	0.0004368	0.005967
Kif4	3.333	1.742	5.749	0.0004297	0.005937
Slc19a1	-1.776	6.127	-5.793	0.0004084	0.005785
Arhgap6	-1.206	4.47	-5.627	0.0004943	0.006449
Ccdc85c	1.181	3.29	5.458	0.0006029	0.007259
Bmp6	-1.203	3.966	-5.551	0.0005407	0.00678
Nup210	3.731	2.995	5.457	0.000604	0.007265
Runx1t1	-1.644	2.405	-5.416	0.000634	0.007455
Tmem173	1.729	4.475	5.576	0.0005248	0.006656
Fbp1	3.902	1.113	6.301	0.0002325	0.004465
Uba2	-1.165	7.754	-5.825	0.0003937	0.005649
Slc16a6	2.874	2.915	5.415	0.0006345	0.007455
Pik3cg	1.383	3.216	5.429	0.0006244	0.007423
Cdh6	-1.473	3.828	-5.506	0.0005698	0.007022
Itgb4	-1.858	4.769	-5.613	0.0005025	0.006494
Mark1	-1.559	4.867	-5.623	0.0004967	0.006459
Ddx39	1.034	4.77	5.613	0.0005029	0.006494
Uhrf1	2.843	3	5.369	0.0006704	0.007704
Cd1d1	2.665	0.7452	6.114	0.0002852	0.004801
Tmem37	1.001	4.076	5.504	0.000571	0.00703
Prob1	-1.745	2.174	-5.371	0.0006687	0.007694
Ptgr1	-1.618	1.824	-5.4	0.0006461	0.00755
Slc22a18	-1.63	2.015	-5.369	0.0006708	0.007704
Serpinb6b	1.149	6.197	5.725	0.0004414	0.005997
Emp3	-1.035	4.615	-5.573	0.0005268	0.00667
Diap3	2.72	1.507	5.621	0.0004977	0.006461
Mrgprh	-3.443	1.975	-5.424	0.0006283	0.007455
Hopx	1.619	3.591	5.398	0.0006478	0.00755
Vav3	1.527	1.73	5.417	0.0006333	0.007455
Evc	-1.138	4.641	-5.562	0.0005334	0.006714
Baiap2	1.012	5.778	5.681	0.0004645	0.00622
Lipc	4.512	1.836	5.847	0.0003842	0.005579
Gper1	-2.028	6.01	-5.677	0.0004666	0.006223
Mcam	-1.436	8.132	-5.734	0.0004369	0.005967
Cep170b	-1.425	3.335	-5.368	0.0006717	0.007708
Ackr2	4.398	3.17	5.351	0.0006854	0.007818
Myl9	-2.484	8.847	-5.707	0.0004508	0.006084
Gramd1b	1.52	2.405	5.307	0.0007222	0.008039
Hcar1	-1.614	3.387	-5.357	0.0006804	0.007767
Cdc20	1.525	3.49	5.348	0.0006875	0.00782
Plscr1	-1.31	4.482	-5.502	0.0005725	0.007036
Klhl30	-2.214	1.736	-5.345	0.0006902	0.007838
Dbndd2	-1.135	5.683	-5.635	0.0004902	0.006426
Adamts14	-2.133	2.878	-5.287	0.0007402	0.00817
Cystm1	-1.667	2.565	-5.265	0.0007604	0.008255
Dse	-1.529	2.757	-5.272	0.0007537	0.008235
Tspyl4	-1.559	4.13	-5.415	0.0006347	0.007455
Cysltr2	-1.338	3.799	-5.371	0.0006686	0.007694
Dcbld2	-1.065	4.14	-5.419	0.0006319	0.007455
P2ry14	-1.81	5.219	-5.538	0.0005484	0.006857
Pdlim1	-1.393	4.296	-5.429	0.0006246	0.007423
Uba7	1.225	6.086	5.621	0.0004979	0.006461
Pcdh18	-1.954	5.627	-5.573	0.0005269	0.00667
Tyms	1.239	3.6	5.316	0.0007144	0.00798
Srpk3	-2.309	0.3701	-5.768	0.0004203	0.005895
Tmem136	-1.395	2.871	-5.249	0.0007746	0.008358
Iqgap3	4.93	1.662	5.908	0.0003584	0.005406
Smim5	-3.043	1.75	-5.319	0.0007116	0.00797
Cacna1d	-1.167	3.147	-5.274	0.0007515	0.008224
Cep55	4.229	1.487	5.803	0.0004038	0.005757
Ptges3l	-2.085	1.382	-5.341	0.0006938	0.007852
Pydc3	4.049	1.199	5.97	0.0003345	0.005208
Nlrc3	3.235	2.639	5.248	0.000776	0.008362
Tacc3	2.076	2.839	5.217	0.0008058	0.008517
Grip2	-3.8	2.704	-5.219	0.0008039	0.008505
Camk2g	-1.219	5.819	-5.576	0.0005247	0.006656
Cenpe	3.078	2.626	5.226	0.0007968	0.008471
Mylk4	-3.185	1.156	-5.44	0.0006164	0.007353
Myh11	-2.656	10.15	-5.571	0.0005276	0.006673
Dlg3	-1.486	3.572	-5.279	0.000747	0.008203
Nckap5l	1.215	5.432	5.51	0.0005671	0.006996
Cyp1b1	-1.675	3.547	-5.265	0.0007596	0.008255
Slc6a17	-1.699	5.083	-5.468	0.000596	0.007222
Lrrc32	-1.437	6.752	-5.597	0.0005119	0.006564
Hn1	1.024	5.008	5.459	0.0006023	0.007258
Atf5	-1.16	6.749	-5.598	0.0005115	0.006564
Slc16a11	-2.522	1.442	-5.284	0.000743	0.008175
Nek2	3.814	0.943	6.038	0.0003102	0.005055
Papln	3.351	1.087	5.73	0.0004392	0.005979
Mrc1	-3.196	3.386	-5.187	0.0008355	0.008711
Hapln1	-2.773	1.504	-5.278	0.0007484	0.00821
Asb10	-3.07	-0.0259	-6.077	0.000297	0.004902
Ppic	1.203	6.743	5.588	0.0005177	0.006605
Osbpl3	-1.385	3.668	-5.266	0.0007593	0.008255
Kit	1.916	4.427	5.328	0.0007046	0.007911
Sema5a	-1.229	5.75	-5.525	0.0005571	0.006921
Ctla2b	2.331	4.769	5.347	0.0006888	0.007829
Ppp1r14c	-2.085	1.425	-5.244	0.0007797	0.008378
Tagln	-2.676	9.092	-5.56	0.0005348	0.006725
Mn1	-1.151	3.314	-5.214	0.0008085	0.008532
Dmpk	-2.062	4.691	-5.365	0.0006734	0.007718
Dpysl3	-1.344	5.598	-5.49	0.0005809	0.007092
Kif20a	3.554	2.442	5.208	0.0008148	0.008578
Tgfbi	-1.602	4.703	-5.374	0.0006665	0.007689
Ndrg2	-1.668	6.461	-5.537	0.0005496	0.006865
Rad54b	-1.725	4.489	-5.339	0.0006954	0.007855
Xirp1	-1.978	3.348	-5.181	0.0008423	0.008755
Orai2	2.308	1.261	5.393	0.0006519	0.007562
Plscr4	-1.216	5.543	-5.467	0.0005966	0.007222
Ptgir	-1.572	2.385	-5.104	0.0009252	0.009292
Homer1	1.186	3.119	5.139	0.0008862	0.009059
Dact1	-1.183	3.479	-5.191	0.0008314	0.008683
Mfge8	-1.009	8.913	-5.526	0.0005568	0.006921
Sox5	-1.873	2.626	-5.091	0.0009406	0.009376
Cnnm2	-1.255	5.491	-5.43	0.0006233	0.007421
Raver2	-1.124	2.426	-5.083	0.0009496	0.009417
Arvcf	-1.581	4.834	-5.34	0.0006941	0.007852
Sh2b2	1.728	3.006	5.087	0.0009454	0.009391
Bmp2k	1.279	4.132	5.227	0.0007959	0.008471
Slc26a10	-1.752	3.91	-5.2	0.0008229	0.008628
Shc3	4.164	0.9607	5.903	0.0003607	0.005428
Ryr2	-2.181	1.67	-5.075	0.0009591	0.009476
Sema6c	-1.681	2.511	-5.036	0.001006	0.009808
Slc9a5	1.304	2.214	5.033	0.00101	0.009831
Adra2c	-3.194	1.557	-5.126	0.0009009	0.009137
Ssu2	-2.179	0.9774	-5.203	0.0008192	0.008617
Disc1	2.28	1.092	5.281	0.0007451	0.008189
Tmod1	-1.183	3.695	-5.142	0.0008834	0.009051
P4htm	-1.909	2.124	-5.011	0.001038	0.009903
Ccnd2	-1.145	7.521	-5.455	0.0006049	0.007268
Sytl2	-1.29	4.386	-5.224	0.0007988	0.008471
Ankrd13b	1.209	2.788	5.019	0.001029	0.009871
Abcb1b	-1.628	1.389	-5.067	0.000969	0.009532
Ifltd1	2.116	3.223	5.021	0.001026	0.009866
Kank2	-1.404	6.852	-5.423	0.0006287	0.007455
Mmrn1	2.352	1.663	5.082	0.0009508	0.009422
Ncf2	-1.77	3.671	-5.087	0.0009454	0.009391
Sdk1	2.004	3.92	5.077	0.0009568	0.00946
Dctd	3.568	0.469	5.984	0.0003294	0.005186
Gprc5c	-2.98	5.423	-5.265	0.0007599	0.008255
Samd4	-1.575	3.39	-5.049	0.0009901	0.009701
Nog	-1.874	1.512	-5.015	0.001033	0.009883
Ndst3	-1.797	3.34	-5.036	0.001007	0.009811
Fbln7	-2.395	1.421	-5.041	0.001	0.009766
Ramp1	-1.878	2.766	-4.982	0.001077	0.01014
Rassf2	1.405	4.636	5.194	0.0008281	0.008665
Tigd4	-4.968	-0.8515	-6.254	0.0002448	0.004521
Inhba	-2.862	0.8009	-5.216	0.0008064	0.008517
Col4a5	-1.585	4.923	-5.236	0.0007876	0.008435
Angptl2	-1.513	4.663	-5.201	0.0008217	0.008628
Mastl	2.103	1.616	5.029	0.001015	0.009837
Aspn	-2.054	6.813	-5.364	0.0006745	0.00772
Rgma	-1.483	4.395	-5.156	0.0008679	0.008942
Lurap1	-1.472	2.031	-4.932	0.001146	0.01057
Npas2	-1.925	2.727	-4.941	0.001133	0.01049
Fads3	-1.681	5.036	-5.225	0.0007974	0.008471
Rgs4	-2.383	8.611	-5.361	0.000677	0.007735
Drd1	-2.767	0.3859	-5.338	0.0006962	0.007857
Troap	5.492	-1.502	7.561	6.541e-05	0.002285
Serpinb1a	-1.619	3.92	-5.067	0.0009691	0.009532
Basp1	2.553	3.251	4.927	0.001154	0.0106
Scgb3a1	4.221	2.729	4.952	0.001119	0.0104
Obsl1	-1.77	4.073	-5.067	0.0009692	0.009532
Eif5a2	-1.072	3.155	-4.963	0.001103	0.01032
Mannr	-1.952	1.228	-4.968	0.001096	0.01028
Foxp2	-1.572	1.597	-4.906	0.001186	0.0108
Ism2	-2.093	0.5537	-5.15	0.000874	0.00899
Mlph	1.498	4.686	5.123	0.0009045	0.009166
Pla2r1	-1.834	3.818	-5.008	0.001043	0.009926
Birc5	4.846	1.21	5.624	0.0004961	0.006457
Actr3b	-3.156	0.5204	-5.232	0.0007907	0.008455
Gm5431	3.928	0.8361	5.563	0.0005327	0.006712
Rasl12	-2.916	5.528	-5.167	0.0008566	0.008853
Tnr	5.281	0.8481	6.176	0.0002663	0.004724
Syt15	-1.276	6.05	-5.264	0.0007606	0.008255
H2afx	1.208	4.407	5.07	0.0009651	0.009521
AI593442	-2.079	1.826	-4.861	0.001255	0.01118
Ces2e	2.241	2.57	4.847	0.001276	0.01128
Cp	-1.408	9.146	-5.284	0.0007424	0.008175
Kcnma1	-2.508	1.602	-4.877	0.00123	0.01103
Fam180a	-1.848	1.626	-4.853	0.001267	0.01125
Chst12	-1.386	3.853	-4.986	0.001071	0.01011
Fam26e	-2.234	1.509	-4.865	0.001248	0.01115
Airn	-1.861	1.018	-4.934	0.001144	0.01057
Enpp1	-1.891	3.91	-4.969	0.001094	0.01026
Ppp1r14b	1.079	3.914	4.977	0.001084	0.01019
Ces5a	-2.808	1.521	-4.877	0.00123	0.01103
Ezh2	1.455	3.677	4.93	0.00115	0.01059
Clu	-1.612	7.368	-5.273	0.0007525	0.008229
Abhd15	2.005	1.026	5.024	0.001022	0.009866
Mmgt2	-1.161	3.556	-4.933	0.001145	0.01057
Ifitm10	-2.412	1.15	-4.904	0.001188	0.0108
Cdkn2a	7.038	-1.155	6.765	0.0001429	0.00353
Cald1	-2.1	9.292	-5.233	0.0007898	0.008452
1500009L16Rik	-1.965	2.312	-4.791	0.001371	0.01181
Nrros	1.039	4.407	5.024	0.001022	0.009866
Notch3	-1.977	8.664	-5.236	0.0007872	0.008435
Meis3	-1.297	2.063	-4.781	0.001389	0.01188
Daam2	-1.865	6.669	-5.222	0.000801	0.008481
Aplnr	1.677	7.678	5.247	0.000777	0.008362
Vgll3	-2.496	2.15	-4.773	0.001404	0.01195
Synpo2l	-2.343	2.067	-4.769	0.001411	0.01199
Pla2g4a	-1.175	6.875	-5.223	0.0007996	0.008473
Trib3	-1.698	3.143	-4.821	0.001319	0.01153
Fblim1	-1.627	3.91	-4.918	0.001167	0.01067
Ddx60	1.406	3.471	4.843	0.001283	0.01133
Chek2	1.049	2.949	4.797	0.001362	0.01175
Trpc1	-1.779	2.758	-4.776	0.001398	0.01194
Ttk	3.37	1.448	4.96	0.001107	0.01034
Itpr2	1.132	6.705	5.2	0.0008228	0.008628
Cdca8	3.179	2.028	4.812	0.001335	0.01165
Sema3g	-1.332	8.886	-5.194	0.000829	0.008665
Cemip	-2.01	3.073	-4.782	0.001387	0.01186
Oas1g	3.125	1.681	4.85	0.001272	0.01126
Sntb1	-2.316	3.122	-4.767	0.001414	0.01201
Slc7a2	-1.514	4.888	-5.022	0.001024	0.009866
C1qtnf7	-1.834	3.613	-4.825	0.001313	0.01149
Aurka	2.374	1.502	4.805	0.001348	0.01171
Plce1	-2.099	6.478	-5.14	0.0008856	0.009059
Nasp	1.01	5.399	5.072	0.0009626	0.009503
Tubb2a	1.298	5.577	5.081	0.0009523	0.00943
Doc2b	-2.587	1.29	-4.766	0.001416	0.01201
Ckap2	5.24	1.41	5.34	0.0006943	0.007852
Ube2c	4.672	1.594	5.048	0.000992	0.009711
Evc2	-1.152	3.276	-4.787	0.001378	0.01185
Scn2b	-2.544	2.64	-4.702	0.001539	0.01273
2810417H13Rik	5.154	1.257	5.397	0.0006481	0.00755
Agpat2	-1.005	3.251	-4.786	0.00138	0.01185
Sez6l	-1.45	3.05	-4.746	0.001452	0.01218
Arhgap42	-1.795	4.705	-4.959	0.001108	0.01034
Cfi	4.536	0.1095	6.099	0.00029	0.004834
Impact	-1.303	5.094	-5.021	0.001025	0.009866
P2ry2	-1.558	2.552	-4.697	0.001549	0.01279
Axl	-1.631	7.776	-5.149	0.0008755	0.008999
Pnck	-2.275	1.239	-4.725	0.001492	0.01243
Ptges	1.955	6.055	5.066	0.0009701	0.009534
Zbtb7c	-1.912	1.771	-4.666	0.001611	0.01314
Thy1	2.184	2.43	4.655	0.001633	0.01321
Ddit4l	-1.905	4.059	-4.837	0.001293	0.01139
Asf1b	2.957	0.6304	5.108	0.0009205	0.009264
Fmo2	-2.317	4.519	-4.883	0.00122	0.011
Afap1l2	-1.127	7.35	-5.129	0.0008979	0.009128
2810459M11Rik	3.659	0.3564	5.496	0.0005764	0.007057
Lamb1	1.291	6.828	5.116	0.0009119	0.009221
Ephx3	-1.321	4.28	-4.875	0.001232	0.01104
Sgce	-1.459	4.158	-4.854	0.001266	0.01125
Fam81a	-2.136	3.975	-4.802	0.001352	0.01173
Bmpr1a	-1.782	5.439	-5.005	0.001047	0.009955
Gm5820	-2.08	0.7278	-4.783	0.001386	0.01186
Aldh1a1	1.102	9.105	5.097	0.0009332	0.009341
Lmod3	-4.262	-0.8173	-5.594	0.0005141	0.00658
Pbxip1	-1.276	7.311	-5.103	0.0009264	0.009294
Ccdc69	-1.228	1.482	-4.633	0.001681	0.01342
Mob3c	1.115	3.719	4.762	0.001424	0.01202
Casz1	-1.714	1.118	-4.674	0.001594	0.01308
Klhdc8b	-1.412	4.003	-4.809	0.00134	0.01167
Gucy1a3	-2.22	6.584	-5.057	0.0009803	0.009619
Stat1	1.562	8.684	5.091	0.0009401	0.009376
Kcnab1	-2.296	5.243	-4.943	0.001131	0.01048
Dram1	-1.489	3.888	-4.786	0.00138	0.01185
Abca9	-2.163	4.721	-4.881	0.001223	0.01101
Rd3	1.328	1.845	4.61	0.001732	0.01367
Npy1r	-2.255	5.675	-4.984	0.001075	0.01013
Smoc2	2.043	4.105	4.754	0.001438	0.01212
Acta2	-2.788	10.03	-5.03	0.001015	0.009837
Rsad2	2.072	6.303	5.021	0.001026	0.009866
Dpysl4	5.438	-1.552	6.436	0.0002014	0.00419
Kcnn4	-2.189	2.709	-4.612	0.001728	0.01365
Pim3	1.023	5.958	5.015	0.001034	0.009884
Samsn1	3.006	3.083	4.587	0.001785	0.01393
Vstm4	-1.756	4.593	-4.85	0.001273	0.01126
Atp1a2	-2.071	9.468	-5.029	0.001016	0.009838
Sh3bp5	1.237	6.39	5.03	0.001015	0.009837
Acss1	-1.817	2.351	-4.579	0.001806	0.01404
Cryab	-1.245	5.825	-4.996	0.001058	0.01003
Fut4	2.987	1.572	4.67	0.001602	0.01312
Gm4951	3.424	4.232	4.647	0.001651	0.01331
Sdc2	-2.244	7.044	-5.018	0.001029	0.009871
E130012A19Rik	2.705	1.526	4.632	0.001684	0.01343
Ppp1r26	-2.17	1.037	-4.621	0.001708	0.01354
Dpp4	1.108	6.06	4.981	0.001078	0.01015
Tril	-1.242	6.089	-4.987	0.001071	0.01011
BC030867	4.816	-1.363	6.29	0.0002354	0.004468
Cenpm	4.09	0.3973	5.395	0.00065	0.00755
Zfp37	-1.045	3.587	-4.683	0.001577	0.01298
Mapk6	1.656	6.538	4.987	0.00107	0.01011
Nt5dc2	1.471	3.53	4.623	0.001704	0.01352
Iqgap2	2.828	2.568	4.507	0.001983	0.01493
Mtmr7	-1.518	1.902	-4.507	0.001984	0.01493
2810029C07Rik	1.631	1.035	4.615	0.001721	0.01361
Kif23	1.944	3.388	4.572	0.001822	0.01411
Smad7	-1.062	4.687	-4.81	0.001339	0.01167
Slc22a3	-3.714	1.852	-4.522	0.001946	0.01476
Brca1	2.597	1.391	4.593	0.001771	0.01386
Gimap6	1.265	7.909	4.986	0.001071	0.01011
Socs2	1.123	5.355	4.864	0.00125	0.01115
Smad9	-2.153	1.954	-4.479	0.002058	0.01532
Mms22l	1.47	1.753	4.485	0.002044	0.01524
Asb11	-3.124	-0.6917	-5.333	0.0006998	0.007886
Slc24a3	-1.196	2.625	-4.513	0.001967	0.01484
Plekhg3	-2.036	5.358	-4.844	0.001281	0.01132
Pdzd4	-1.637	2.238	-4.475	0.00207	0.01538
Prss23	-1.065	7.99	-4.959	0.001108	0.01034
Aurkb	5.436	0.4661	5.627	0.0004945	0.006449
Gsn	-1.506	7.049	-4.945	0.001128	0.01047
Plxnb1	-1.39	5.748	-4.883	0.001219	0.011
Lrg1	1.107	5	4.8	0.001356	0.01173
Ankrd13d	-1.153	1.604	-4.446	0.002151	0.01572
E2f8	4.089	-0.1234	5.583	0.0005208	0.006632
Slc30a10	-2.273	3.782	-4.588	0.001782	0.01392
Baz1a	1.42	4.318	4.663	0.001617	0.01315
Adora2b	-1.93	0.8741	-4.5	0.002002	0.01503
Ccnb2	3.783	1.348	4.635	0.001678	0.01341
Melk	4.124	1.39	4.672	0.001598	0.01309
Tfpi2	1.669	1.73	4.425	0.002212	0.01605
Bub1b	4.075	2.144	4.486	0.002039	0.01522
Ttc39b	1.297	4.912	4.746	0.001453	0.01218
Spats2	1.011	4.246	4.66	0.001623	0.01317
Sebox	-2.041	1.062	-4.459	0.002114	0.01557
Dock11	-1.478	3.652	-4.57	0.001827	0.01413
Nr2f2	-1.368	6.205	-4.87	0.001241	0.0111
Kirrel	-1.945	4.726	-4.703	0.001535	0.01271
Prrt4	-1.179	4.499	-4.695	0.001552	0.01281
Gcnt4	-1.817	1.655	-4.4	0.002288	0.01641
Tk1	3.902	0.975	4.744	0.001456	0.0122
Bpifb1	3.745	-0.01391	5.307	0.0007222	0.008039
Shcbp1	5.168	0.5431	5.317	0.0007138	0.00798
Pygl	-1.292	2.899	-4.45	0.002141	0.01569
Clspn	3.162	1.081	4.578	0.001807	0.01404
Nxnl2	-3.601	-1.389	-5.277	0.0007491	0.00821
Limd1	-1.138	6.509	-4.861	0.001254	0.01118
Sept1	1.602	2.65	4.396	0.002298	0.01646
Pif1	5.794	-1.851	5.833	0.0003901	0.005616
Bmp5	-1.802	2.605	-4.402	0.002281	0.01638
Kifc1	2.159	0.8583	4.524	0.001941	0.01474
Spag5	2.595	1.437	4.443	0.002161	0.01577
Dlgap5	3.368	0.814	4.667	0.00161	0.01314
Rad51ap1	2.326	1.198	4.454	0.002129	0.01565
G6pc	4.851	-1.176	5.73	0.000439	0.005979
Klhdc1	-1.307	1.627	-4.359	0.002417	0.01712
Prrt3	-2.177	0.9272	-4.425	0.002211	0.01605
Trim30a	1.337	6.796	4.855	0.001265	0.01125
Il2rg	1.069	6.856	4.859	0.001257	0.0112
Mybl2	3.747	-0.1193	5.302	0.0007272	0.008067
Cks1b	2.16	1.946	4.355	0.00243	0.01719
Stom	-1.036	8.01	-4.852	0.001269	0.01126
Arhgef10l	-1.387	3.198	-4.449	0.002142	0.01569
Mx2	2.266	3.462	4.421	0.002224	0.0161
Ccne2	1.781	2.176	4.338	0.002486	0.01741
Kif20b	1.636	2.337	4.34	0.00248	0.01739
Bub1	4.102	1.367	4.546	0.001886	0.01447
Rerg	-1.074	2.243	-4.349	0.002449	0.01727
Pitpnm1	-1.379	4.336	-4.605	0.001745	0.01375
Gm11627	-2.892	-0.2005	-4.738	0.001468	0.01227
Rragd	-1.21	2.932	-4.404	0.002274	0.01636
Clec3b	-2.194	2.077	-4.322	0.002539	0.01765
Thrb	-1.61	1.653	-4.32	0.002548	0.01768
Sox6	-1.707	3.62	-4.468	0.00209	0.01545
Cyp2e1	-3.407	1.185	-4.371	0.002377	0.01689
Slfn8	2.976	2.363	4.306	0.002595	0.01788
Hmcn1	1.449	6.192	4.77	0.001409	0.01198
Ccl24	-4.124	-1.304	-5.056	0.0009816	0.009625
Lxn	1.239	4.879	4.641	0.001664	0.01335
Slc7a11	-1.191	4.036	-4.534	0.001915	0.01463
Gramd4	-1.078	3.811	-4.5	0.002003	0.01503
Adrbk2	-1.484	2.278	-4.31	0.002583	0.01784
Rgag4	-1.277	2.059	-4.299	0.00262	0.01796
Col12a1	-2.232	2.851	-4.338	0.002485	0.01741
Cpxm2	-1.447	2.788	-4.352	0.002438	0.01722
Kcng2	2.891	0.01912	4.856	0.001263	0.01124
Rps6kl1	2.134	1.11	4.369	0.002383	0.0169
Slc22a6	-2.846	1.135	-4.329	0.002516	0.01757
Ntf3	-3.119	0.7373	-4.406	0.002269	0.01634
Cntnap1	-1.659	1.787	-4.28	0.002687	0.01829
Ccdc3	-2	5.519	-4.684	0.001574	0.01296
Kif14	4.704	-0.7268	5.443	0.0006138	0.007335
Prelp	-2.038	7.197	-4.774	0.001402	0.01195
Dpt	-2.124	0.4669	-4.411	0.002254	0.01625
Tm6sf2	-1.648	1.092	-4.301	0.002611	0.01792
Hr	-1.351	3.499	-4.429	0.002201	0.01599
Mum1l1	1.663	1.964	4.269	0.002729	0.01848
Ifi35	1.023	6.625	4.77	0.001409	0.01198
Rgcc	1.499	5.42	4.659	0.001626	0.01318
Aoc3	-2.359	6.877	-4.747	0.001451	0.01218
Zfp647	-1.144	1.823	-4.258	0.002771	0.01864
Pbk	4.297	1.11	4.588	0.001784	0.01392
Lgr6	3.663	-0.352	5.226	0.0007972	0.008471
Sox3	5.192	-1.138	5.417	0.0006329	0.007455
AA414768	-1.069	1.844	-4.243	0.002828	0.01883
Ddx11	1.003	2.728	4.295	0.002635	0.01804
Scd1	-1.602	5.125	-4.619	0.001713	0.01356
Dot1l	1.084	4.482	4.534	0.001914	0.01463
Sema6a	1.003	6.099	4.712	0.001518	0.01259
Slc44a5	2.713	1.013	4.371	0.002376	0.01689
Fmod	-1.707	5.484	-4.646	0.001654	0.01332
Gm6792	4.619	-1.791	5.578	0.0005238	0.006656
C1qtnf6	1.367	4.504	4.512	0.00197	0.01485
Pxylp1	-1.619	1.688	-4.217	0.002929	0.01923
Pdgfa	-1.044	5.366	-4.639	0.001669	0.01337
Selenbp1	-1.215	2.361	-4.245	0.00282	0.01882
Atp13a3	-1.113	6.228	-4.701	0.00154	0.01273
Gsta4	1.007	5.677	4.655	0.001635	0.01322
Pygm	-1.905	5.966	-4.667	0.00161	0.01314
5930403L14Rik	-1.997	4.463	-4.491	0.002027	0.01517
Gjb6	-2.47	1.898	-4.206	0.002972	0.01936
Ccnf	2.271	0.9787	4.305	0.0026	0.01788
Trpv4	-1.238	5.496	-4.635	0.001678	0.01341
Gm13749	-2.666	-0.3511	-4.6	0.001755	0.01379
Stil	3.097	-0.09862	4.836	0.001295	0.01139
Ptger1	-1.532	1.722	-4.196	0.003014	0.01953
Fmo1	-1.718	6.171	-4.67	0.001604	0.01312
Rragb	-1.708	1.666	-4.188	0.003045	0.01966
Pak6	3.291	0.03268	4.789	0.001375	0.01183
Cacna1e	3.395	1.617	4.244	0.002824	0.01882
Zfp827	1.59	3.032	4.256	0.002778	0.01867
Dbf4	2.207	2.302	4.185	0.003061	0.01971
Ifit1bl2	1.239	1.761	4.174	0.003107	0.01988
Serpina3n	2.317	2.075	4.172	0.003114	0.01992
Fabp7	4.526	2.982	4.174	0.003107	0.01988
Col6a6	-1.856	7.043	-4.681	0.00158	0.013
Hap1	2.098	2.668	4.189	0.003042	0.01966
BC051019	-2.512	-0.6158	-4.665	0.001614	0.01314
Tcf24	-1.835	0.5512	-4.247	0.002811	0.0188
Gpr17	5.857	1.793	4.473	0.002074	0.01539
Rgs9	1.912	1.583	4.17	0.003124	0.01995
Shroom3	1.726	2.487	4.176	0.003098	0.01985
Fignl1	2.137	1.653	4.163	0.003151	0.02005
Spc25	3.128	1.29	4.244	0.002822	0.01882
Gpr161	-1.485	1.35	-4.149	0.003212	0.0203
Esrrg	2.919	1.331	4.215	0.002935	0.01923
Spc24	3.608	0.6657	4.453	0.00213	0.01565
Dclk2	1.569	2.999	4.21	0.002957	0.01929
Pid1	-1.614	4.352	-4.414	0.002245	0.01621
Slc6a20a	-1.672	4.07	-4.368	0.002386	0.01691
1700025G04Rik	-1.414	3.17	-4.244	0.002824	0.01882
Rem1	-1.546	2.983	-4.216	0.002933	0.01923
Lrrc55	5.834	2.357	4.264	0.002747	0.01854
Fjx1	-1.226	2.902	-4.203	0.002983	0.01937
Knstrn	2.727	2.249	4.109	0.003394	0.02107
Klhl23	-1.275	5.282	-4.529	0.001928	0.01469
Cdkn3	2.352	0.236	4.392	0.002312	0.01655
D030028A08Rik	1.831	0.5989	4.216	0.002933	0.01923
Ccdc68	-1.718	1.167	-4.091	0.003481	0.02145
Ednra	-1.954	5.79	-4.534	0.001915	0.01463
Neu4	5.064	-1.51	5.095	0.0009353	0.009348
Chmp4c	-2.168	1.351	-4.079	0.003539	0.02167
Cspg4	-2.229	7.465	-4.595	0.001767	0.01386
Mas1	-3.855	-0.9471	-4.616	0.00172	0.01361
Foxc2	-1.717	2.338	-4.099	0.003444	0.02128
E030002O03Rik	-1.77	1.355	-4.061	0.003627	0.022
Myo19	1.06	2.337	4.084	0.003514	0.02156
Pde4c	-2.434	1.596	-4.055	0.003658	0.02212
Pde6a	-2.301	-0.4074	-4.387	0.002328	0.01662
Cdk15	-2.934	0.2267	-4.221	0.002911	0.01914
Trpc4	-1.464	2.451	-4.094	0.003467	0.02139
Tnfsf8	6.359	0.1748	4.802	0.001353	0.01173
Slc25a35	-1.137	2.889	-4.146	0.003226	0.02038
Pkdrej	-3.228	-1.598	-4.73	0.001484	0.01237
Cbr2	-1.738	3.735	-4.242	0.002829	0.01883
Nat8l	-1.246	2.521	-4.1	0.003439	0.02127
Col23a1	-1.359	3.034	-4.157	0.003178	0.02015
Timp1	3.583	1.517	4.104	0.003421	0.02118
Cd163	-4.29	0.4856	-4.237	0.002849	0.01889
Gins2	1.626	1.125	4.067	0.0036	0.02194
Taf1d	1.13	3.708	4.235	0.002858	0.01891
Cfb	3.614	5.81	4.381	0.002344	0.01672
Rnf152	-1.465	5.218	-4.449	0.002144	0.01569
4930520O04Rik	-2.847	-0.7334	-4.537	0.001907	0.0146
Prkar2b	-1.107	5.164	-4.448	0.002145	0.01569
Ccnb1	4.848	0.797	4.448	0.002144	0.01569
Pde8b	-1.957	4.862	-4.374	0.002368	0.01684
Car2	1.292	7.603	4.563	0.001843	0.01423
Neurl1b	-1.688	1.631	-4.009	0.0039	0.02313
Rarres2	-1.54	4.656	-4.353	0.002435	0.01721
Pde1b	-1.641	2.965	-4.108	0.003402	0.0211
Ebf2	-2.373	0.1836	-4.151	0.003206	0.02028
Gja1	1.757	5.928	4.471	0.002082	0.01541
Fam64a	5.022	0.5246	4.566	0.001836	0.01419
Etnk2	-1.385	2.788	-4.087	0.003499	0.02151
Sgol2a	2.402	1.216	4.048	0.003694	0.02226
Car13	2.218	1.257	4.03	0.003786	0.02268
Dock8	-1.077	3.85	-4.234	0.002863	0.01892
Mxd3	3.432	0.05129	4.473	0.002076	0.01539
Mis18bp1	4.158	0.1315	4.55	0.001874	0.0144
Nudt17	-1.701	1.087	-3.994	0.003981	0.02341
F2rl1	-1.456	3.971	-4.237	0.00285	0.01889
1810041L15Rik	2.765	0.6438	4.154	0.00319	0.02022
B3gnt3	1.399	4.643	4.322	0.00254	0.01765
5830417I10Rik	-1.041	2.513	-4.045	0.003711	0.02232
Trpc3	-1.825	3.26	-4.119	0.003347	0.02084
Gprc5b	-1.56	5.739	-4.452	0.002134	0.01567
Mcm10	4.107	-0.0873	4.624	0.001702	0.01352
Efna4	-1.275	1.416	-3.976	0.004083	0.02378
Tmem51os1	-1.586	0.5725	-4.029	0.003795	0.0227
Ttc34	-2.86	0.1569	-4.127	0.003314	0.02075
Tnfrsf11b	3.643	-0.3002	4.626	0.001697	0.01351
Cotl1	1.788	4.884	4.304	0.002601	0.01788
Oasl1	2.57	4.445	4.194	0.003022	0.01956
Adam12	2.783	0.8586	4.058	0.003646	0.02208
Rad51	2.469	1.851	3.947	0.004255	0.02448
Rfx8	4.173	-1.336	4.838	0.001291	0.01137
Fkbp11	2.239	0.2606	4.144	0.003235	0.02042
Irf5	1.055	3.503	4.115	0.003368	0.02092
Igsf3	-1.014	3.091	-4.072	0.003576	0.02181
Cdc45	1.441	2.162	3.943	0.004275	0.02456
Cebpd	1.785	5.456	4.346	0.002458	0.01727
Cdca3	3.606	0.4252	4.243	0.002828	0.01883
Kif15	3.955	0.7372	4.164	0.003147	0.02004
Htr1b	-1.682	0.512	-3.973	0.004101	0.02386
Nrip3	-1.59	1.873	-3.927	0.004377	0.02491
Mdga2	1.534	2.631	3.964	0.004153	0.02407
Pctp	-1.32	1.653	-3.917	0.004437	0.02521
Cdc6	2.397	1.084	3.964	0.004156	0.02407
Cdca5	4.34	-0.1643	4.58	0.001802	0.01402
Kif18b	4.158	0.06064	4.434	0.002185	0.0159
Ncapg	3.692	1.766	3.939	0.004304	0.02466
Pnmal2	-1.505	3.474	-4.091	0.003482	0.02145
Chpf	-1.223	3.729	-4.133	0.003285	0.02061
2700099C18Rik	2.173	-0.2588	4.261	0.002757	0.01858
Pkp3	-2.493	-0.001196	-4.062	0.003622	0.022
Lsm4	1.036	4.447	4.227	0.002887	0.01904
Rnf183	4.471	-0.895	4.644	0.001658	0.01333
Adcyap1r1	-1.697	3.649	-4.095	0.003461	0.02136
Susd2	-1.369	4.169	-4.183	0.003068	0.01975
Rad51b	2.968	1.804	3.893	0.004588	0.02571
Casc5	4.116	0.53	4.229	0.00288	0.01901
Kntc1	3.65	0.8354	4.059	0.003639	0.02206
Lrp1	-1.654	7.477	-4.432	0.002193	0.01595
F830016B08Rik	4.612	1.282	4.062	0.003625	0.022
C530005A16Rik	-1.593	1.164	-3.865	0.004776	0.02647
Prrx1	-1.441	4.481	-4.205	0.002977	0.01936
Fgfr4	3.244	-0.4606	4.44	0.002169	0.01582
Atp1a3	1.781	1.29	3.869	0.004747	0.02634
Esco2	4.367	-0.2654	4.516	0.001961	0.01482
Mnda	2.839	0.7595	3.967	0.004136	0.02401
Sh3bgr	-1.615	1.852	-3.86	0.004808	0.02658
Tmigd1	1.909	0.7438	3.909	0.004489	0.02536
Sema3a	4.446	-0.7533	4.528	0.001929	0.01469
Hmmr	3.867	1.678	3.876	0.004702	0.02619
Hebp2	-1.379	2.107	-3.864	0.004779	0.02648
Cdca2	3.354	0.5617	4.023	0.003826	0.02282
Sgol1	4.263	-0.1236	4.41	0.002257	0.01627
Depdc1a	4.51	-1.43	4.599	0.001758	0.01381
Rnf150	-1.85	3.04	-3.951	0.00423	0.02437
Lcp2	1.441	2.967	3.929	0.004364	0.02485
Pcdhgc4	3.769	-0.9436	4.572	0.001821	0.01411
Pcdh7	1.205	3.598	4.025	0.003813	0.02277
Col8a1	-1.496	4.985	-4.232	0.002867	0.01894
Ckap2l	3.406	1.987	3.82	0.005089	0.02764
Pola2	1.089	3.74	4.041	0.003733	0.02241
Mtfr2	4.335	-1.11	4.523	0.001941	0.01474
9430091E24Rik	-2.225	-0.7185	-4.141	0.003249	0.02046
Zfp428	1.02	2.488	3.866	0.004772	0.02646
Cend1	-1.49	2.346	-3.854	0.004853	0.02672
Slco5a1	1.857	0.7437	3.853	0.004858	0.02674
C330027C09Rik	2.082	2.233	3.813	0.005139	0.02786
Cnrip1	-1.218	2.194	-3.84	0.004949	0.02708
Slfn10-ps	1.615	1.999	3.806	0.005195	0.02807
Igsf1	-1.962	1.418	-3.794	0.005282	0.02835
Ppa1	1.206	5.285	4.239	0.002842	0.01888
Sp6	-1.627	2.338	-3.842	0.004937	0.02704
Gm5089	-1.959	-0.2245	-3.958	0.004191	0.02421
Ccna2	4.477	2.841	3.789	0.005321	0.02847
Cenpk	2.13	-0.1183	4.048	0.003696	0.02226
Inpp4a	-1.053	4.314	-4.119	0.003349	0.02084
Slc39a14	-1.56	2.758	-3.875	0.004706	0.02619
Aspm	4.819	1.075	3.979	0.004068	0.02375
Slc1a4	1.158	4.474	4.121	0.003341	0.02083
Ppap2b	-1.185	6.42	-4.322	0.00254	0.01765
Fanca	3.324	-0.2277	4.215	0.002935	0.01923
Baiap3	-2.009	1.923	-3.785	0.005349	0.02857
Grik3	3.17	0.3655	3.987	0.004022	0.02358
Pcdhb5	1.322	1.272	3.767	0.005488	0.0291
Bspry	1.974	0.6676	3.821	0.00508	0.02761
Prr15	-1.646	1.039	-3.757	0.005572	0.0294
Exoc3l4	2.059	1.23	3.766	0.005498	0.02913
Cyp4b1	-1.458	1.348	-3.746	0.005653	0.02966
Kif19a	1.606	0.3076	3.849	0.004882	0.02684
Palm2	-1.506	1.966	-3.769	0.005477	0.02907
Pkp2	1.091	1.699	3.749	0.005632	0.0296
Gm14420	-1.173	2.92	-3.877	0.004695	0.02618
Ska1	3.945	-0.543	4.346	0.002457	0.01727
Stbd1	-1.508	1.818	-3.751	0.005613	0.02958
Cks2	2.423	0.06429	3.938	0.004306	0.02466
Mgl2	-3.304	0.4431	-3.798	0.00525	0.02826
Rgs5	-1.861	10.46	-4.247	0.002811	0.0188
Brip1	2.857	0.3954	3.877	0.004698	0.02618
Apba2	3.013	1.038	3.774	0.005437	0.02893
Bricd5	3.22	-0.7136	4.291	0.00265	0.0181
Spdl1	1.65	0.7088	3.751	0.005614	0.02958
Bik	-2.009	-0.4424	-3.909	0.004489	0.02536
Irgm2	1.393	7.307	4.285	0.00267	0.01819
Etv4	2.302	0.327	3.83	0.005018	0.02738
Arhgap24	-1.081	2.632	-3.796	0.005266	0.02831
Gpr143	3.618	-0.2838	4.143	0.003241	0.02043
Sox11	6.669	-0.2899	4.168	0.00313	0.01997
Fat1	-1.134	5.649	-4.191	0.003035	0.01962
Psrc1	3.634	-0.3342	4.146	0.003229	0.02039
5930412G12Rik	-2.194	-0.277	-3.837	0.004971	0.02717
Ccdc67	-1.389	1.155	-3.674	0.006275	0.03201
Gria2	3.799	0.9556	3.787	0.005332	0.02851
Orc1	4.548	-1.836	4.353	0.002435	0.01721
Serpine1	3.454	4.931	3.951	0.004229	0.02437
Lmtk3	3.815	-1.181	4.292	0.002646	0.01809
Col2a1	3.827	-1.024	4.266	0.002738	0.01851
Usp20	-1.095	3.966	-3.962	0.004166	0.02411
Nat14	-1.31	2.816	-3.785	0.005351	0.02857
Kif2c	4.292	0.7261	3.86	0.004811	0.02659
Pttg1	1.741	1.755	3.662	0.006384	0.03233
Iigp1	2.562	7.39	4.223	0.002902	0.0191
Lgr4	-1.091	2.891	-3.795	0.005275	0.02835
Ccdc184	-1.087	1.676	-3.665	0.006357	0.03225
Matn4	3.483	0.4524	3.825	0.005057	0.02754
Pianp	-1.25	4.503	-4.021	0.003837	0.02286
Gsg2	2.92	0.7111	3.723	0.005847	0.03036
Gtse1	2.392	0.8203	3.683	0.00619	0.03165
Dtl	3.205	0.7953	3.719	0.00588	0.0305
Tspyl5	-1.864	1.526	-3.631	0.006676	0.03329
Cmpk2	1.04	6.735	4.201	0.002994	0.01944
Agtr1b	-2.788	0.09957	-3.708	0.005976	0.03085
Sp7	-3.235	-0.6726	-3.9	0.004546	0.02557
Sptbn2	2.173	2.681	3.676	0.006257	0.03194
Gimap9	1.227	4.554	3.988	0.004014	0.02354
Madcam1	3.707	0.3176	3.832	0.005005	0.02732
Nmnat2	-2.212	3.79	-3.849	0.004887	0.02684
Trip13	1.84	1.012	3.612	0.006859	0.03398
Loxl3	-1.276	2.966	-3.752	0.005611	0.02958
Oip5	2.309	0.4481	3.676	0.006259	0.03194
Eva1a	1.483	2.879	3.695	0.006084	0.03126
Fam65b	-1.009	1.91	-3.615	0.006829	0.03386
Tmem191c	-1.114	0.9388	-3.577	0.00722	0.03508
Gp1bb	-1.265	1.01	-3.575	0.00724	0.0351
Snta1	-1.366	3.849	-3.862	0.004798	0.02657
Fgf12	1.371	1.872	3.584	0.007152	0.03492
Tiam2	-1.111	2.256	-3.633	0.006661	0.03326
Rnf165	2.884	-0.4448	3.916	0.004443	0.02523
Rgs8	3.526	-0.5499	4.007	0.003911	0.02317
Fam69b	1.263	3.431	3.766	0.005501	0.02913
Ska3	4.296	-0.2772	3.997	0.003965	0.02334
Dusp27	-1.462	2.017	-3.593	0.007055	0.03464
Chd3os	-1.028	1.181	-3.546	0.007555	0.03617
Ppm1e	-1.909	3.665	-3.787	0.005332	0.02851
Il33	-2.613	3.651	-3.75	0.005622	0.02958
Tmem25	-1.653	-0.3337	-3.661	0.006394	0.03233
Ctxn1	1.69	1.224	3.538	0.00764	0.0364
Fam78a	2.044	1.124	3.543	0.007582	0.03627
Enpp6	1.308	2.687	3.633	0.006653	0.03323
Ankdd1b	-2.286	0.8964	-3.532	0.007711	0.03651
Dpf1	4.527	-0.1493	3.93	0.004357	0.02485
Gm15880	-2.179	-0.3049	-3.644	0.00655	0.03288
Ubash3b	1.941	1.86	3.525	0.007789	0.03677
Pdzrn3	-1.418	3.329	-3.727	0.005815	0.03026
Adssl1	-1.851	2.861	-3.647	0.006521	0.03279
H2-K1	1.283	9.93	4.081	0.003528	0.02162
Arhgap11a	1.768	2.56	3.577	0.007219	0.03508
Gm16576	-1.359	2.568	-3.614	0.006839	0.0339
Slc20a2	-1.389	5.643	-4.031	0.003784	0.02268
Pycr1	1.956	0.5992	3.541	0.007611	0.03635
Ticrr	3.071	-0.7861	3.94	0.004297	0.02466
Clec4n	-1.453	0.2217	-3.534	0.007683	0.03645
Slc22a2	-2.81	0.8166	-3.503	0.008049	0.0376
Kcnk2	-1.496	2	-3.539	0.007635	0.0364
H2-Q1	1.992	2.701	3.561	0.007392	0.03562
Fgfbp1	5.345	2.016	3.53	0.007732	0.03656
Flna	-1.326	10.55	-4.043	0.003721	0.02236
Lypd2	-2.105	0.2521	-3.525	0.00779	0.03677
B3gnt8	-2.513	-0.134	-3.573	0.007261	0.03516
Il34	-1.487	5.071	-3.944	0.004273	0.02456
Irgm1	2.547	7.787	4.073	0.003571	0.0218
Fam109b	-1.941	-0.3667	-3.586	0.007128	0.03486
Crispld2	-1.191	6.444	-4.055	0.003658	0.02212
Plxdc1	-1.352	4.978	-3.93	0.004355	0.02485
Klf8	-1.748	0.844	-3.469	0.008457	0.03892
Scube2	-1.297	2.436	-3.562	0.007376	0.03557
E030013I19Rik	-3.143	-0.5971	-3.665	0.006356	0.03225
St8sia2	-2.055	0.8484	-3.468	0.00847	0.03896
Slc5a5	-1.646	3.883	-3.765	0.005507	0.02913
Gm684	-1.167	3.548	-3.724	0.005839	0.03035
Cmbl	-1.502	2.29	-3.538	0.00764	0.0364
Nodal	-2.047	1.071	-3.459	0.008584	0.03932
Slc15a3	2.019	3.417	3.632	0.006669	0.03328
Phf11c	2.909	0.3935	3.547	0.007543	0.03614
Cirbp	-1.021	4.162	-3.809	0.005168	0.02798
Kbtbd13	-3.242	0.06309	-3.53	0.007729	0.03655
Myc	3.092	2.965	3.515	0.007901	0.03704
Nova1	1.957	1.816	3.458	0.008589	0.03932
Il20rb	-2.29	0.219	-3.485	0.008265	0.0382
Prps2	-1.219	4.923	-3.909	0.00449	0.02536
Gm9899	-2.354	0.72	-3.451	0.008684	0.03965
Rtn2	-1.178	2.375	-3.533	0.007698	0.03649
Eda	-2.522	0.005094	-3.501	0.008068	0.03763
Acot7	1.177	4.156	3.777	0.005412	0.02884
Chaf1b	1.311	2.208	3.49	0.008199	0.03796
Plin4	-3.985	1.702	-3.432	0.008927	0.04046
Ackr4	-2.362	1.163	-3.431	0.008939	0.04048
Pgam2	-3.436	-1.504	-3.689	0.006137	0.03143
Il18rap	3.848	0.9335	3.489	0.008208	0.03799
Nupr1	-1.293	3.053	-3.602	0.006967	0.03436
Cenpp	1.724	0.3852	3.454	0.008639	0.03948
Herc6	1.469	5.367	3.909	0.004486	0.02536
Angpt2	1.119	6.227	3.993	0.00399	0.02343
Ccdc18	2.406	-0.1216	3.568	0.00732	0.0354
Notch2	-1.022	4.391	-3.808	0.005176	0.02802
Rnd3	-1.649	5.392	-3.918	0.00443	0.02518
Depdc1b	1.692	0.9458	3.409	0.009244	0.04143
Parp11	1.082	3.907	3.715	0.005911	0.03062
Wnk4	1.268	1.683	3.419	0.009098	0.04098
Slc12a2	-1.223	7.7	-4.019	0.003846	0.02291
Tmem38a	-1.06	3.255	-3.626	0.006728	0.03344
Omd	-1.873	0.9093	-3.393	0.009454	0.04214
Bcl7a	-1.409	1.583	-3.414	0.009168	0.0412
Gm14403	-2.074	4.083	-3.714	0.005922	0.03065
Asb5	-3.36	-0.481	-3.549	0.007523	0.03606
C2cd4c	-2.231	-0.04072	-3.441	0.008813	0.04008
Pmaip1	1.215	6.324	3.971	0.004114	0.0239
Fxyd1	-1.551	4.691	-3.808	0.00518	0.02803
Dna2	2.159	-0.4411	3.569	0.007304	0.03534
Vipr2	-1.729	1.706	-3.398	0.009386	0.0419
Iapp	6.564	-1.473	3.714	0.005921	0.03065
Neto2	3.455	1.128	3.392	0.009478	0.04219
Mme	1.291	3.039	3.535	0.007674	0.03645
Exo1	3.001	-0.07949	3.543	0.00759	0.03627
Rhbdl1	-1.956	-0.4287	-3.461	0.008559	0.03925
Ect2	1.606	2.224	3.416	0.009145	0.04115
Fam83d	4.134	0.00989	3.605	0.006929	0.03423
Mx1	4.061	0.9779	3.419	0.009098	0.04098
Acss3	1.009	1.542	3.37	0.009793	0.04303
Comp	-1.77	0.3025	-3.367	0.009825	0.04311
Ube2cbp	1.146	0.914	3.35	0.01008	0.04394
Megf11	5.122	-0.6431	3.672	0.00629	0.03205
Itgb5	-1.28	6.51	-3.953	0.004219	0.02435
Pvr	1.418	4.973	3.806	0.005191	0.02807
Pappa2	-2.675	1.043	-3.342	0.0102	0.04432
Srpx2	-1.474	1.61	-3.37	0.009794	0.04303
Gbp3	1.506	8.475	3.964	0.004157	0.02407
Chka	1.232	5.019	3.811	0.005157	0.02795
Apc2	-1.08	2.855	-3.508	0.007986	0.03738
1810034E14Rik	-2.006	-0.5336	-3.449	0.008714	0.03975
Lyve1	-1.763	0.7597	-3.33	0.01039	0.04494
Hfe2	-2.212	-0.7598	-3.49	0.008198	0.03796
Pou3f1	3.125	1.219	3.331	0.01038	0.04489
Fam196a	-1.729	0.7802	-3.32	0.01054	0.04535
Hsd11b2	2.515	-0.2833	3.479	0.008335	0.03844
Csmd2	2.066	0.6437	3.337	0.01028	0.04461
Ccr9	-1.684	0.8257	-3.313	0.01064	0.04558
Medag	-2.434	0.8649	-3.313	0.01065	0.04558
E130307A14Rik	-1.044	1.604	-3.342	0.01021	0.04435
Zwilch	1.569	1.043	3.309	0.01071	0.04581
Igf2	-1.793	8.219	-3.931	0.004353	0.02485
Gstt1	-1.455	2.907	-3.481	0.008306	0.03835
Smad1	1.008	5.042	3.794	0.005283	0.02835
Gata6	-1.815	1.548	-3.323	0.01049	0.04523
Frmd5	-1.462	1.957	-3.35	0.01008	0.04394
B230217C12Rik	-1.11	1.31	-3.303	0.01081	0.04614
Il12rb1	1.522	0.05846	3.336	0.01029	0.04461
Lrrc14b	-3.189	-0.6978	-3.44	0.008821	0.0401
Crhr2	-1.773	2.341	-3.374	0.009723	0.04285
Spred3	1.331	1.652	3.298	0.0109	0.04643
A830082K12Rik	-1.876	0.753	-3.275	0.01128	0.0474
Slc39a4	2.118	0.3339	3.313	0.01066	0.0456
Chrna7	-2.088	-0.1524	-3.322	0.01051	0.04529
Col15a1	-1.844	5.177	-3.772	0.005449	0.02898
Rasl11b	-1.2	2.785	-3.436	0.008874	0.04027
Adam3	3.076	-0.8415	3.58	0.007187	0.03504
Wisp2	3.542	-1.163	3.613	0.006857	0.03398
Hcls1	1.168	3.736	3.557	0.007431	0.03576
Trim30d	1.277	1.655	3.283	0.01114	0.04704
Kctd1	-1.057	3.726	-3.577	0.007217	0.03508
Rad54l	2.095	-0.007058	3.337	0.01028	0.04461
Ankrd34a	-1.392	1.124	-3.261	0.01151	0.04805
Brwd3	1.046	3.499	3.521	0.007841	0.03694
Grm5	3.306	-0.006672	3.396	0.009421	0.04202
Edar	1.388	1.116	3.25	0.01169	0.04852
Ephb2	3.882	-0.1128	3.457	0.008601	0.03936
Tmem26	-1.258	1.042	-3.25	0.01171	0.04855
Cst6	1.788	0.4857	3.26	0.01153	0.04806
Rai2	-1.887	1.231	-3.253	0.01165	0.04838
Begain	-1.718	0.6852	-3.243	0.01182	0.0489
Samd15	2.379	-0.2607	3.374	0.009726	0.04285
Atp13a5	-1.582	7.281	-3.874	0.004713	0.02621
Grtp1	-1.858	1.209	-3.248	0.01174	0.04864
Rrad	-1.538	3.792	-3.557	0.007438	0.03578
Ifi204	3.159	2.945	3.314	0.01063	0.04557
Abca8a	-2.608	3.269	-3.433	0.008913	0.04042
Gbgt1	-1.772	0.3901	-3.241	0.01187	0.04904
Phkg1	-3.023	-0.5772	-3.352	0.01005	0.04381
Oprl1	-3.132	-0.8194	-3.377	0.009679	0.04274
Ncmap	1.707	0.05806	3.268	0.0114	0.04772
5430416N02Rik	2.924	-0.6836	3.465	0.008505	0.03909
Myt1	4.922	-1.187	3.501	0.008068	0.03763
C1ql1	4.636	-1.098	3.501	0.008074	0.03763
Plk1	4.304	1.368	3.229	0.01208	0.04971
Ifi202b	3.818	3.11	3.266	0.01143	0.04783
Wee1	1.043	3.862	3.534	0.007685	0.03645
9130008F23Rik	-1.689	-0.1697	-3.24	0.01188	0.04907
Apol9b	1.955	2.853	3.332	0.01035	0.04483
Lrmp	-1.147	1.757	-3.249	0.01172	0.04858
Vasn	-1.176	4.633	-3.657	0.006431	0.03245
Artn	-2.814	-1.094	-3.367	0.009835	0.04312
Bid	1.651	1.893	3.226	0.01212	0.04981
Cdkn1a	1.676	7.453	3.837	0.004966	0.02715
Thsd7a	-1.146	3.098	-3.408	0.009247	0.04143
Cenpa	1.25	2.296	3.265	0.01144	0.04784
Plcl1	-1.103	5.212	-3.706	0.005993	0.03088
Gm19705	-2.71	-0.9977	-3.314	0.01064	0.04557
Olfm2	3.445	-0.4986	3.377	0.009681	0.04274
Mlkl	1.519	4.236	3.537	0.007651	0.03641
3110035E14Rik	5.79	0.4745	3.357	0.009979	0.04361
Cd209b	-3.584	-0.964	-3.293	0.01097	0.04662
Sdr42e1	-1.043	2.445	-3.296	0.01092	0.04649
Rxfp3	-2.876	-1.095	-3.315	0.01061	0.04553
Per1	1.323	4.637	3.601	0.006973	0.03437
Tmem79	1.687	-0.3959	3.249	0.01173	0.04859
Traf4	1.189	2.165	3.232	0.01203	0.04951
Aldh1a7	1.268	4.631	3.6	0.006983	0.03439
B2m	1.094	10.92	3.746	0.005657	0.02967
A830082N09Rik	-2.8	-0.9995	-3.284	0.01113	0.04703
Dhh	-1.116	3.483	-3.427	0.008993	0.04069
Fbn1	-1.486	5.012	-3.642	0.006573	0.03296
Gen1	2.81	-0.7993	3.354	0.01003	0.04375
Marcksl1	1.956	4.35	3.5	0.008074	0.03763
Fabp5	1.804	2.836	3.271	0.01134	0.04759
Igf2bp3	3.533	-0.1208	3.261	0.01151	0.04805
Igfbpl1	4.727	-0.3722	3.245	0.01179	0.04882
Tspan2	-1.581	6.94	-3.712	0.005939	0.03071
Cdc25c	3.361	-0.5199	3.228	0.01209	0.04972
Mov10	1.17	4.989	3.552	0.00749	0.03596
Ttyh2	1.16	8.164	3.708	0.005977	0.03085
Ascl1	5.079	-2.28	3.281	0.01118	0.04716
Serpina3h	4.211	5.908	3.465	0.00851	0.0391
Slfn2	1.258	6.487	3.661	0.006394	0.03233
Trafd1	1.072	6.021	3.63	0.006685	0.03332
Lin7a	-1.132	3.832	-3.368	0.009813	0.04308
Tec	-1.058	4.066	-3.369	0.009796	0.04303
Tubb2b	1.873	4.19	3.321	0.01053	0.04533
Cyfip2	1.314	3.836	3.279	0.01121	0.04724
Anpep	-1.277	4.906	-3.446	0.008743	0.03985
Trim2	-1.41	4.182	-3.317	0.01059	0.0455
Coro2a	-1.39	3.724	-3.242	0.01184	0.04896
Ifi203	1.013	6.786	3.546	0.007555	0.03617
Gbp7	1.328	8.104	3.516	0.007891	0.03701
Epb4.1l1	-1.331	4.686	-3.319	0.01056	0.04542
Gnao1	-1.06	5.338	-3.381	0.009627	0.0426
Ifi47	1.677	6.92	3.461	0.008559	0.03925
Cd248	-1.609	6.55	-3.442	0.008793	0.04001
Trim16	1.413	5.653	3.378	0.009667	0.04271
Map2	-1.311	5.242	-3.349	0.0101	0.04398
Tgtp2	2.13	5.083	3.259	0.01155	0.04811
Itga4	1.018	6.514	3.406	0.009274	0.04151
Ace2	-1.173	5.515	-3.269	0.01137	0.04768
Lama2	-1.611	6.01	-3.255	0.01161	0.0483
Pdgfrb	-1.863	8.371	-3.287	0.01107	0.04687
H2-T23	1.613	7.022	3.276	0.01125	0.04734
Igtp	1.915	7.573	3.238	0.01192	0.04918

## Sheet: DEG_CTX_vs_pHGG_EC
Gene ID	logFC	AveExpr	t	P.Value	adj.P.Val
Cotl1	4.65	6.844	43.34	6.705e-11	9.111e-07
Palld	-4.393	5.729	-37.37	2.221e-10	1.509e-06
Mpeg1	6.793	7.84	33.44	5.441e-10	2.437e-06
Crip1	-3.872	6.3	-31.01	1.002e-09	2.437e-06
Nnat	4.599	5.823	32.11	7.55e-10	2.437e-06
Abcg1	3.24	7.222	30.27	1.215e-09	2.437e-06
Neo1	-2.743	5.353	-29.22	1.614e-09	2.437e-06
Fbln2	-5.716	5.333	-30.1	1.272e-09	2.437e-06
Sat1	2.344	7.172	27.91	2.336e-09	2.776e-06
Tpm2	-6.27	6.128	-28.7	1.87e-09	2.54e-06
Emp2	-4.714	6.22	-27.65	2.519e-09	2.776e-06
Abca1	2.524	8.132	27.37	2.734e-09	2.776e-06
Marcksl1	4.833	5.329	29.28	1.589e-09	2.437e-06
Rcn3	-3.374	5.271	-27.11	2.951e-09	2.776e-06
Rcan2	-3.583	5.928	-26.29	3.782e-09	3.212e-06
Bche	-3.537	5.713	-25.73	4.495e-09	3.393e-06
Alpl	-5.832	5.965	-25.92	4.243e-09	3.391e-06
Ebf1	-2.875	6.32	-24.89	5.868e-09	3.987e-06
Fhl1	-3.786	4.549	-24.9	5.843e-09	3.987e-06
Rnd3	-2.74	5.021	-24.3	7.125e-09	4.401e-06
Wtip	-2.83	5.893	-24.04	7.745e-09	4.575e-06
Mob2	-2.345	5.796	-23.42	9.58e-09	5.207e-06
Klhl6	2.848	6.179	23.2	1.032e-08	5.394e-06
Irf8	5.768	5.366	24.43	6.822e-09	4.401e-06
Col8a1	-4.19	4.465	-22.86	1.163e-08	5.853e-06
Cdk19	-2.626	7.188	-22.38	1.378e-08	6.031e-06
Pik3cg	4.43	4.514	23.83	8.324e-09	4.713e-06
Inpp5a	-2.049	6.317	-22.24	1.445e-08	6.031e-06
Pabpc1	2.004	10.22	22.2	1.468e-08	6.031e-06
Utrn	-2.5	8.47	-22.04	1.557e-08	6.031e-06
Pdgfra	4.27	6.321	21.91	1.633e-08	6.031e-06
C1qa	5.912	8.355	21.82	1.687e-08	6.031e-06
Adcy5	-4.209	4.502	-22.09	1.526e-08	6.031e-06
Aoc3	-5.988	4.893	-22.24	1.45e-08	6.031e-06
Fscn1	4.987	7.108	21.57	1.849e-08	6.333e-06
Alox12	-3.683	3.307	-22.73	1.217e-08	5.907e-06
Tagln	-6.474	7.235	-21.48	1.911e-08	6.333e-06
Plek	5.454	6.345	21.52	1.881e-08	6.333e-06
Vegfc	-4.557	4.108	-21.85	1.668e-08	6.031e-06
Sirpa	3.826	7.19	21.2	2.122e-08	6.408e-06
Efemp2	-1.861	5.024	-21.13	2.18e-08	6.408e-06
Slc29a3	2.262	6.44	21.1	2.207e-08	6.408e-06
Jag1	-2.279	6.872	-21.09	2.217e-08	6.408e-06
Ephx1	-2.329	6.697	-21.07	2.227e-08	6.408e-06
Pkia	-1.868	5.852	-21.03	2.264e-08	6.408e-06
Syne1	-3.407	5.801	-20.96	2.324e-08	6.445e-06
Pln	-8.812	3.902	-26.99	3.064e-09	2.776e-06
Cobll1	-2.847	6.97	-20.87	2.402e-08	6.528e-06
Adcy9	-2.225	5.419	-20.79	2.477e-08	6.581e-06
Ctss	6.505	9.285	20.75	2.518e-08	6.581e-06
Cryab	-2.361	5.254	-20.69	2.574e-08	6.6e-06
Lcp1	3.515	7.685	20.61	2.658e-08	6.69e-06
Tmem173	3.475	5.786	20.31	2.989e-08	7.029e-06
Filip1	-3.302	5.064	-20.26	3.046e-08	7.029e-06
Pnkd	-1.767	5.847	-20.27	3.037e-08	7.029e-06
Ppap2b	-3.245	5.815	-20.19	3.137e-08	7.029e-06
Kank2	-2.388	6.364	-20.21	3.113e-08	7.029e-06
Rplp0	1.854	9.911	20.11	3.24e-08	7.029e-06
Smad6	-3.365	4.96	-19.99	3.39e-08	7.029e-06
Pgd	1.974	7.102	20.05	3.312e-08	7.029e-06
Itgam	5.52	7.345	19.91	3.509e-08	7.029e-06
Lmo7	-3.351	5.747	-19.91	3.507e-08	7.029e-06
Ptprm	-1.632	7.756	-19.94	3.466e-08	7.029e-06
Rbpms2	-4.037	3.598	-20.46	2.818e-08	6.962e-06
C1qc	6.101	7.919	19.75	3.731e-08	7.283e-06
Serpine1	4.535	6.068	19.74	3.752e-08	7.283e-06
Glce	-2.029	4.886	-19.6	3.97e-08	7.391e-06
Jak3	1.792	6.675	19.32	4.447e-08	7.811e-06
Mturn	-3.477	5.161	-19.15	4.782e-08	7.894e-06
Kcnb1	-4.01	3.07	-20.08	3.277e-08	7.029e-06
Slc15a3	4.807	5.276	19.33	4.43e-08	7.811e-06
Scara3	-4.211	3.212	-19.9	3.517e-08	7.029e-06
Gsto1	2.462	5.203	19.04	4.997e-08	7.894e-06
Sncg	-4.752	4.216	-19.26	4.557e-08	7.811e-06
Lrp8	2.173	7.555	19.13	4.826e-08	7.894e-06
Bst2	1.774	6.932	19.07	4.93e-08	7.894e-06
Tubb2b	4.56	5.435	19.06	4.955e-08	7.894e-06
Litaf	2.531	7.624	19.04	4.996e-08	7.894e-06
Cyth4	3.292	6.479	18.97	5.144e-08	7.894e-06
Msx1	-3.746	3.574	-19.24	4.599e-08	7.811e-06
Atp13a2	2.096	6.918	18.95	5.2e-08	7.894e-06
Acta2	-6.719	8.276	-18.84	5.433e-08	7.906e-06
Plekho2	2.45	6.131	18.86	5.392e-08	7.906e-06
Fbln5	-5.337	6.458	-18.81	5.518e-08	7.906e-06
Tgfb3	-4.718	3.703	-19.28	4.527e-08	7.811e-06
Megf9	-2.271	3.917	-18.8	5.527e-08	7.906e-06
Cpe	1.636	9.911	18.71	5.739e-08	7.957e-06
Plekhg3	-3.782	4.324	-18.74	5.683e-08	7.957e-06
Tril	-3.699	4.822	-18.68	5.834e-08	8.007e-06
Aim2	1.881	4.585	18.57	6.105e-08	8.295e-06
Eif4a1	1.572	8.035	18.5	6.283e-08	8.327e-06
Ppp1r12b	-4.758	3.241	-19.27	4.54e-08	7.811e-06
C1qb	6.218	7.966	18.36	6.675e-08	8.407e-06
Pgrmc1	-1.541	7.43	-18.47	6.371e-08	8.327e-06
Cdkn1a	2.406	7.434	18.47	6.374e-08	8.327e-06
Ltbp1	-3.741	5.531	-18.32	6.802e-08	8.407e-06
Sbno2	1.988	6.219	18.4	6.572e-08	8.407e-06
Tubb5	1.936	9.3	18.36	6.69e-08	8.407e-06
Tpm1	-2.569	8.786	-18.27	6.933e-08	8.412e-06
Rhpn2	-4.312	3.355	-18.73	5.71e-08	7.957e-06
Nudt4	-1.896	7.146	-18.29	6.886e-08	8.412e-06
Irf6	-6.23	3.375	-19.67	3.86e-08	7.388e-06
Thra	-2.097	6.643	-18.25	6.996e-08	8.412e-06
Tm4sf1	-1.662	9.122	-18.16	7.294e-08	8.618e-06
Itgb4	-3.843	3.923	-18.22	7.112e-08	8.477e-06
Nrip2	-6.045	3.685	-18.91	5.286e-08	7.894e-06
Tbc1d16	1.734	5.777	18.09	7.505e-08	8.716e-06
Ecm2	-3.705	5.708	-18.01	7.769e-08	8.829e-06
Reck	-3.5	6.23	-18.02	7.763e-08	8.829e-06
Ezh2	2.167	4.183	17.98	7.903e-08	8.829e-06
Cd180	5.386	5.027	18.32	6.806e-08	8.407e-06
Ntn4	-4.959	5.422	-17.86	8.32e-08	8.987e-06
Adcy7	5.646	4.128	19.57	4.025e-08	7.391e-06
Slc38a1	2.554	4.661	17.85	8.354e-08	8.987e-06
Myl9	-6.331	6.911	-17.79	8.595e-08	8.987e-06
Ppp1cb	-1.652	8.006	-17.86	8.317e-08	8.987e-06
Hcls1	4.974	5.572	17.79	8.598e-08	8.987e-06
Ak2	1.594	5.73	17.82	8.465e-08	8.987e-06
Fam49b	3.303	6.586	17.73	8.801e-08	9.085e-06
Stmn2	-4.045	5.551	-17.67	9.046e-08	9.085e-06
Fcgr1	6.027	5.773	17.81	8.499e-08	8.987e-06
Prkar2b	-2.034	4.782	-17.65	9.126e-08	9.085e-06
Plcb4	-2.177	5.531	-17.69	8.983e-08	9.085e-06
Efhd1	-4.875	2.715	-18.98	5.136e-08	7.894e-06
Marveld1	-3.263	6.618	-17.66	9.111e-08	9.085e-06
Gba	1.747	6.482	17.66	9.112e-08	9.085e-06
Sncaip	-2.516	3.744	-17.41	1.02e-07	9.926e-06
Rab11fip3	-1.806	5.498	-17.4	1.023e-07	9.926e-06
Casq2	-5.586	4.176	-17.5	9.768e-08	9.618e-06
Crispld1	-5.62	3.554	-17.89	8.224e-08	8.987e-06
Ctdspl	-2.342	4.619	-17.26	1.089e-07	1.03e-05
Ptpre	2.864	4.258	17.22	1.11e-07	1.03e-05
Dmpk	-5.645	3.077	-18.33	6.777e-08	8.407e-06
Lrrc8d	1.923	5.353	17.2	1.121e-07	1.03e-05
Akap6	-2.18	3.89	-17.14	1.155e-07	1.03e-05
Myo5a	2.909	5.561	17.17	1.139e-07	1.03e-05
Ces2g	-3.45	3.202	-17.38	1.034e-07	9.962e-06
Mrvi1	-5.556	4.755	-17.15	1.147e-07	1.03e-05
Itpr3	-1.97	7.082	-17.26	1.092e-07	1.03e-05
Aif1l	-3.057	5.804	-17.18	1.132e-07	1.03e-05
St6galnac3	-1.64	5.573	-17.21	1.118e-07	1.03e-05
Cytl1	-7.735	2.67	-21.33	2.019e-08	6.408e-06
Prkag2	-1.756	4.731	-17.1	1.175e-07	1.03e-05
Maob	-3.831	4.212	-17.05	1.204e-07	1.032e-05
Calcoco1	-1.405	5.985	-17.18	1.134e-07	1.03e-05
Inpp5d	2.529	7.096	17.15	1.145e-07	1.03e-05
Esyt2	-1.755	8.448	-17.11	1.171e-07	1.03e-05
Adamtsl1	-5.943	3.606	-17.64	9.159e-08	9.085e-06
Setbp1	-3.989	2.405	-18.11	7.46e-08	8.716e-06
Aprt	1.953	5.48	17.02	1.219e-07	1.035e-05
Lgmn	3.614	8.953	17.06	1.199e-07	1.032e-05
Htra3	4.364	6.023	16.93	1.273e-07	1.035e-05
Naip2	3.123	5.042	16.92	1.28e-07	1.035e-05
Hdac11	-3.287	3.814	-16.94	1.263e-07	1.035e-05
Crtc3	-1.54	5.666	-17.04	1.208e-07	1.032e-05
Nans	1.783	5.615	16.97	1.246e-07	1.035e-05
Mgst1	-2.639	3.943	-16.86	1.314e-07	1.051e-05
Kcnj12	-4.066	2.427	-17.97	7.927e-08	8.829e-06
Lrig1	-1.949	5.562	-16.98	1.244e-07	1.035e-05
Bmp6	-2.693	3.837	-16.81	1.344e-07	1.062e-05
Hck	6.285	3.999	18.93	5.238e-08	7.894e-06
Tm7sf3	-2.017	6.088	-16.93	1.268e-07	1.035e-05
Peg13	-2.135	6.939	-16.92	1.279e-07	1.035e-05
Srm	2.02	5.135	16.66	1.447e-07	1.111e-05
Zc2hc1a	-2.741	4.686	-16.62	1.47e-07	1.121e-05
Coro1a	6.098	5.653	16.73	1.398e-07	1.098e-05
Nckap1l	4.857	6.24	16.57	1.504e-07	1.129e-05
Pde3a	-3.339	5.051	-16.59	1.491e-07	1.125e-05
Fut8	-1.299	6.447	-16.69	1.42e-07	1.104e-05
Mef2c	-1.458	6.992	-16.68	1.43e-07	1.104e-05
Nsg2	-3	4.641	-16.46	1.587e-07	1.165e-05
Oaf	3.032	4.485	16.45	1.595e-07	1.165e-05
Tmem200b	-4.922	3.354	-16.83	1.335e-07	1.061e-05
Tbx18	-4.48	2.762	-17.12	1.163e-07	1.03e-05
Dag1	-1.463	8.133	-16.52	1.541e-07	1.147e-05
Bmpr1a	-1.589	5.599	-16.52	1.545e-07	1.147e-05
Map3k7cl	-6.246	3.574	-16.98	1.244e-07	1.035e-05
Abi3	2.562	5.691	16.32	1.701e-07	1.2e-05
Afap1l2	-3.049	6.262	-16.36	1.666e-07	1.2e-05
Jade1	-1.579	5.155	-16.33	1.692e-07	1.2e-05
Cnnm2	-2.865	4.631	-16.22	1.783e-07	1.236e-05
Ppp1r14b	2.375	4.767	16.2	1.804e-07	1.238e-05
Itpk1	-1.905	5.637	-16.35	1.674e-07	1.2e-05
Prdm16	-5.158	3.316	-16.61	1.477e-07	1.121e-05
Rps7	1.403	8.35	16.31	1.711e-07	1.2e-05
Gkn3	-6.403	4.748	-16.18	1.817e-07	1.241e-05
Cnn1	-6.832	2.548	-18.5	6.293e-08	8.327e-06
Clstn1	-2.249	7.691	-16.27	1.741e-07	1.213e-05
Lzts2	-1.742	5.321	-16.2	1.804e-07	1.238e-05
Nek6	1.854	5.618	16.17	1.829e-07	1.243e-05
Basp1	5.774	5.636	16.04	1.948e-07	1.304e-05
St8sia6	-2.971	4.011	-15.93	2.06e-07	1.327e-05
Serpini1	-4.275	3.914	-15.93	2.057e-07	1.327e-05
Grem2	-6.335	2.966	-17.08	1.186e-07	1.032e-05
Fxyd1	-4.528	3.579	-15.99	1.993e-07	1.321e-05
Fam81a	-5.216	2.627	-16.89	1.298e-07	1.044e-05
Dmd	-2.459	5.27	-15.96	2.031e-07	1.327e-05
Ptpn6	5.309	4.938	15.97	2.015e-07	1.327e-05
Hn1	2.202	5.702	15.9	2.085e-07	1.336e-05
Laptm5	3.571	8.77	15.93	2.056e-07	1.327e-05
Cap2	-4.77	3.69	-15.86	2.134e-07	1.355e-05
Lair1	5.125	5.011	15.82	2.17e-07	1.371e-05
Amigo2	-3.99	3.722	-15.76	2.234e-07	1.386e-05
Arhgap44	-3.56	2.235	-16.44	1.606e-07	1.167e-05
Crispld2	-3.636	5.06	-15.67	2.345e-07	1.423e-05
Atp2a3	-4.384	6.874	-15.73	2.274e-07	1.392e-05
Unc93b1	2.98	6.802	15.77	2.228e-07	1.386e-05
Myom1	-4.312	4.092	-15.57	2.462e-07	1.435e-05
Myh11	-7.204	7.768	-15.61	2.412e-07	1.431e-05
Sh3bp2	3.724	3.478	15.96	2.03e-07	1.327e-05
Dgkb	-6.287	3.18	-16.3	1.713e-07	1.2e-05
Dtx4	3.123	5.228	15.55	2.494e-07	1.435e-05
Ppp1r12c	-1.575	7.032	-15.76	2.234e-07	1.386e-05
Sned1	-2.714	2.763	-15.65	2.369e-07	1.425e-05
Dock2	5.792	5.384	15.49	2.569e-07	1.437e-05
4930523C07Rik	-2.112	5.142	-15.56	2.48e-07	1.435e-05
Mgat3	-3	4.429	-15.43	2.644e-07	1.437e-05
Ppp1r3c	-4.12	3.204	-15.58	2.451e-07	1.435e-05
Ttyh3	2.117	6.867	15.65	2.362e-07	1.425e-05
Rpsa	1.612	9.554	15.56	2.481e-07	1.435e-05
Kif13a	-1.452	5.637	-15.62	2.404e-07	1.431e-05
Myc	4.677	3.667	16.02	1.967e-07	1.31e-05
Hlf	-3.824	3.279	-15.47	2.592e-07	1.437e-05
Obsl1	-2.837	3.605	-15.35	2.759e-07	1.473e-05
Impdh2	1.149	6.445	15.62	2.402e-07	1.431e-05
1600014C10Rik	2.018	5.744	15.5	2.559e-07	1.437e-05
Zbtb4	-1.672	7.183	-15.58	2.457e-07	1.435e-05
Enpp5	-2.486	5.212	-15.45	2.618e-07	1.437e-05
Pvrl2	2.282	6.073	15.49	2.561e-07	1.437e-05
Megf6	2.577	7.003	15.53	2.515e-07	1.435e-05
Lyn	2.212	7.17	15.54	2.504e-07	1.435e-05
B230219D22Rik	-1.184	6.962	-15.55	2.489e-07	1.435e-05
Pdk2	-1.568	4.811	-15.39	2.707e-07	1.46e-05
Ptgs1	2.926	7.014	15.48	2.584e-07	1.437e-05
C4b	4.986	7.915	15.4	2.684e-07	1.453e-05
Slc6a6	-2.894	9.509	-15.34	2.774e-07	1.473e-05
Hdgfrp3	-2.576	4.937	-15.31	2.81e-07	1.474e-05
Zbp1	5.065	4.389	15.45	2.614e-07	1.437e-05
Slmap	-1.6	6.567	-15.47	2.598e-07	1.437e-05
Spsb1	2.541	4.666	15.19	2.987e-07	1.527e-05
Pld4	5.236	5.854	15.17	3.022e-07	1.527e-05
Filip1l	-2.001	6.912	-15.43	2.64e-07	1.437e-05
Ptprc	5.014	4.992	15.21	2.961e-07	1.527e-05
Abhd14b	-2.306	4.272	-15.2	2.977e-07	1.527e-05
Myo9b	1.335	6.615	15.43	2.643e-07	1.437e-05
Rnf152	-4.266	3.932	-15.14	3.074e-07	1.535e-05
Trex1	2.045	4.761	15.16	3.046e-07	1.53e-05
Dusp6	1.954	6.433	15.35	2.756e-07	1.473e-05
Pvr	2.903	5.569	15.18	3.011e-07	1.527e-05
Steap3	2.027	6.412	15.33	2.788e-07	1.474e-05
Kank1	-1.363	6.073	-15.34	2.77e-07	1.473e-05
Tmem109	-1.122	7.128	-15.32	2.804e-07	1.474e-05
Lgalsl	-2.236	5.968	-15.25	2.905e-07	1.516e-05
Uba2	-1.778	7.367	-15.24	2.911e-07	1.516e-05
Parm1	-4.483	3.6	-15.02	3.265e-07	1.577e-05
Gramd1a	1.904	5.195	15.05	3.218e-07	1.577e-05
Sox17	-2.522	6.349	-15.17	3.021e-07	1.527e-05
Afap1	-1.619	4.656	-15.02	3.265e-07	1.577e-05
Eml1	-2.208	6.116	-15.15	3.052e-07	1.53e-05
Cct2	1.241	8.004	15.17	3.018e-07	1.527e-05
Slit3	-4.35	3.225	-15.02	3.273e-07	1.577e-05
Itga7	-3.516	5.934	-15.03	3.253e-07	1.577e-05
Sparcl1	-1.832	11.17	-14.93	3.429e-07	1.641e-05
Ncs1	-2.532	3.373	-14.85	3.583e-07	1.671e-05
Apln	6.306	7.929	14.92	3.443e-07	1.641e-05
Tspan2	-2.69	6.291	-15.06	3.206e-07	1.577e-05
Abat	-1.956	4.165	-14.82	3.626e-07	1.682e-05
Rasl12	-4.907	4.451	-14.76	3.743e-07	1.724e-05
Lcp2	5.773	4.972	14.89	3.507e-07	1.66e-05
Pdzd2	-1.511	5.951	-15.04	3.243e-07	1.577e-05
Smim14	-1.3	6.223	-15.03	3.257e-07	1.577e-05
Scgb3a1	6.516	4.132	15.74	2.261e-07	1.392e-05
Slc2a4	-6.728	1.667	-17.97	7.908e-08	8.829e-06
Fzd2	-4.165	1.864	-15.67	2.338e-07	1.423e-05
Fam73a	-1.418	4.495	-14.77	3.739e-07	1.724e-05
Kif21b	4.274	4.171	14.75	3.774e-07	1.732e-05
Btbd7	-1.423	5.667	-14.89	3.496e-07	1.66e-05
Tlr1	1.961	4.432	14.64	4.008e-07	1.797e-05
Mrto4	1.51	4.492	14.64	3.994e-07	1.797e-05
Irgm1	2.836	7.751	14.85	3.585e-07	1.671e-05
Csgalnact2	-1.538	4.857	-14.72	3.832e-07	1.753e-05
Ankrd29	-2.803	3.551	-14.53	4.253e-07	1.847e-05
Fermt3	3.175	5.722	14.64	3.997e-07	1.797e-05
Osbpl5	-2.668	4.389	-14.58	4.133e-07	1.829e-05
Npy1r	-6.139	3.329	-14.88	3.526e-07	1.664e-05
Jph2	-6.107	3.295	-14.84	3.591e-07	1.671e-05
Csf1r	3.62	8.929	14.7	3.881e-07	1.764e-05
Nuak1	-1.925	6.029	-14.7	3.876e-07	1.764e-05
Mafb	3.733	6.266	14.56	4.185e-07	1.84e-05
Ncf1	5.737	5.497	14.39	4.583e-07	1.874e-05
Cyp39a1	-1.932	3.891	-14.41	4.542e-07	1.873e-05
Ddx39	1.632	5.014	14.5	4.321e-07	1.852e-05
Rpl28	1.498	8.594	14.62	4.034e-07	1.803e-05
Ppm1e	-2.973	3.068	-14.37	4.63e-07	1.874e-05
Il17ra	2.297	5.171	14.45	4.431e-07	1.864e-05
Pgrmc2	-1.197	6.525	-14.65	3.989e-07	1.797e-05
Cds2	-1.428	7.762	-14.59	4.109e-07	1.824e-05
Grn	2.525	9.393	14.52	4.268e-07	1.847e-05
Rps26	1.722	8.464	14.57	4.15e-07	1.831e-05
Ceacam1	-1.878	5.418	-14.53	4.241e-07	1.847e-05
Bcl9l	-1.482	5.286	-14.53	4.256e-07	1.847e-05
Crip2	-1.841	8.326	-14.54	4.23e-07	1.847e-05
Parvg	4.768	4.703	14.31	4.783e-07	1.917e-05
Vezf1	-1.194	6.329	-14.61	4.072e-07	1.814e-05
Nrros	2.67	5.648	14.43	4.477e-07	1.872e-05
Habp4	-1.655	4.648	-14.4	4.548e-07	1.873e-05
Kcnmb1	-4.834	4.348	-14.25	4.954e-07	1.968e-05
Cdadc1	-1.36	5.032	-14.46	4.412e-07	1.864e-05
Hspb2	-4.823	1.538	-15.77	2.228e-07	1.386e-05
Ddit4l	-3.546	2.693	-14.37	4.634e-07	1.874e-05
Itm2c	1.432	9.148	14.42	4.502e-07	1.873e-05
Hey2	-4.73	3.723	-14.19	5.108e-07	2.01e-05
Kctd10	-1.436	8.885	-14.4	4.556e-07	1.873e-05
Ankrd50	-1.951	5.181	-14.38	4.604e-07	1.874e-05
Lrrc49	-1.892	5.329	-14.4	4.564e-07	1.873e-05
Slain2	-1.106	6.335	-14.5	4.317e-07	1.852e-05
Arhgap11a	3.725	3.219	14.49	4.333e-07	1.852e-05
Atp2b4	-5.056	5.532	-14.22	5.033e-07	1.994e-05
Tifab	5.223	3.98	14.48	4.366e-07	1.86e-05
Pald1	1.178	7.203	14.47	4.381e-07	1.86e-05
Sspn	-3.685	3.353	-14.13	5.27e-07	2.044e-05
She	-1.712	7.879	-14.41	4.534e-07	1.873e-05
Snhg18	-2.622	3.685	-14.11	5.35e-07	2.053e-05
Tmeff1	-2.814	4	-14.08	5.434e-07	2.056e-05
Ppp1r14a	-4.196	3.184	-14.12	5.302e-07	2.044e-05
Id3	-1.264	7.443	-14.37	4.627e-07	1.874e-05
Angpt2	3.626	7.884	14.32	4.757e-07	1.912e-05
Pdgfd	-1.445	5.365	-14.3	4.812e-07	1.923e-05
Dixdc1	-2.419	4.696	-14.16	5.19e-07	2.021e-05
Oat	-1.498	6.464	-14.35	4.675e-07	1.885e-05
Frk	-3.646	2.693	-14.17	5.177e-07	2.021e-05
Frrs1	2.967	3.318	14.08	5.421e-07	2.056e-05
Slc39a11	1.827	4.361	14.02	5.612e-07	2.077e-05
Cenpe	4.483	3.281	14.49	4.329e-07	1.852e-05
Stxbp2	2.961	4.47	13.97	5.785e-07	2.111e-05
Fgfr3	-3.573	2.75	-14.05	5.526e-07	2.067e-05
Pign	1.255	5.54	14.19	5.105e-07	2.01e-05
Rcc1	2.411	3.623	13.91	5.971e-07	2.141e-05
Timp1	4.878	2.525	15.52	2.524e-07	1.435e-05
Gfra2	-3.451	3.564	-13.89	6.027e-07	2.146e-05
Smc2	1.755	5.215	14.08	5.42e-07	2.056e-05
Pi16	-4.974	3.038	-14.1	5.381e-07	2.056e-05
Ran	1.103	7.179	14.25	4.95e-07	1.968e-05
Ifi202b	7.22	4.238	14.94	3.411e-07	1.638e-05
Rpl7a	1.421	9.145	14.13	5.287e-07	2.044e-05
Pik3cd	3.04	4.91	13.91	5.962e-07	2.141e-05
Perp	-6.119	3.774	-13.98	5.735e-07	2.106e-05
Myo1d	-1.95	6.692	-14.17	5.167e-07	2.021e-05
Bbs4	-1.964	3.116	-13.83	6.262e-07	2.204e-05
Chpt1	-1.158	5.158	-14.08	5.446e-07	2.056e-05
Cadps2	-5.998	1.936	-15.2	2.971e-07	1.527e-05
Arrb2	2.882	5.431	13.94	5.868e-07	2.121e-05
B4galnt1	4.655	3.766	14.06	5.492e-07	2.067e-05
Hexb	3.578	9.486	14.03	5.6e-07	2.077e-05
Gusb	2.217	7.199	14.12	5.31e-07	2.044e-05
Slamf9	6.318	2.934	16.07	1.919e-07	1.291e-05
C1qbp	1.301	5.879	14.08	5.444e-07	2.056e-05
Cx3cr1	3.275	8.322	14.05	5.537e-07	2.067e-05
Car14	-5.023	2.942	-13.96	5.816e-07	2.113e-05
Snx11	-1.324	5.038	-13.97	5.763e-07	2.111e-05
Col6a6	-5.119	5.258	-13.78	6.426e-07	2.239e-05
Mustn1	-5.329	4.047	-13.72	6.669e-07	2.283e-05
Lipa	1.581	8.173	14.04	5.567e-07	2.072e-05
Plvap	-4.777	4.782	-13.73	6.619e-07	2.277e-05
Abca5	-1.554	4.641	-13.87	6.104e-07	2.166e-05
Jag2	-1.702	7.659	-14.01	5.641e-07	2.077e-05
4632415L05Rik	-1.455	3.972	-13.74	6.567e-07	2.27e-05
Camk2g	-1.943	5.689	-13.96	5.795e-07	2.111e-05
Cdc42bpa	-1.411	6.463	-14.01	5.635e-07	2.077e-05
Atp1b1	-4.079	5.296	-13.77	6.457e-07	2.24e-05
Ctla2a	2.837	9.021	13.92	5.947e-07	2.141e-05
Podxl	-2.086	10.37	-13.79	6.382e-07	2.229e-05
Ogn	-9.657	1.84	-19.58	4.009e-08	7.391e-06
Tubb6	4.857	5.363	13.62	7.033e-07	2.337e-05
Phldb2	-2.18	6.489	-13.95	5.853e-07	2.121e-05
Fmo5	-2.248	4.355	-13.71	6.677e-07	2.283e-05
Jam3	-1.842	5.213	-13.86	6.155e-07	2.173e-05
Ctsz	2.849	8.775	13.9	6.016e-07	2.146e-05
Slc11a1	4.722	5.266	13.6	7.14e-07	2.337e-05
A4galt	-2.791	4.521	-13.7	6.748e-07	2.293e-05
Enpep	-3.58	4.217	-13.61	7.073e-07	2.337e-05
Slc4a3	-4.401	3.534	-13.58	7.191e-07	2.337e-05
Smarcd3	-3.153	4.163	-13.6	7.129e-07	2.337e-05
Tppp3	-2.537	3.574	-13.54	7.374e-07	2.369e-05
Vamp2	-1.784	5.355	-13.81	6.318e-07	2.218e-05
Bak1	1.546	6.441	13.89	6.032e-07	2.146e-05
Lrrc3	3.657	5.076	13.56	7.274e-07	2.353e-05
Panx1	2.07	3.335	13.53	7.426e-07	2.38e-05
Mrgprh	-9.303	-1.051	-22.27	1.429e-08	6.031e-06
Epn2	-1.623	7.15	-13.86	6.157e-07	2.173e-05
Hps4	2.252	4.458	13.55	7.342e-07	2.364e-05
Mllt3	-1.48	5.494	-13.8	6.348e-07	2.223e-05
Fth1	1.676	11.81	13.6	7.133e-07	2.337e-05
Acvr2a	-1.47	4.627	-13.65	6.92e-07	2.327e-05
Plcb1	-1.729	5.569	-13.77	6.463e-07	2.24e-05
Kazald1	-4.216	1.895	-14.06	5.507e-07	2.067e-05
Cenpf	5.645	2.772	15.08	3.171e-07	1.573e-05
Nipal2	-4.827	1.905	-14.19	5.119e-07	2.01e-05
Hmgb2	1.686	4.494	13.52	7.471e-07	2.383e-05
Cxcl16	4.077	5.207	13.41	7.934e-07	2.448e-05
Lamb1	3.618	7.68	13.69	6.751e-07	2.293e-05
Galns	2.549	4.696	13.44	7.819e-07	2.437e-05
Pla2g4a	-2.28	6.418	-13.71	6.688e-07	2.283e-05
Arhgef25	-2.64	3.988	-13.42	7.928e-07	2.448e-05
Pbx1	-1.2	6.444	-13.73	6.603e-07	2.277e-05
Pde5a	-3.16	6.392	-13.64	6.948e-07	2.331e-05
Ctsc	2.386	8.148	13.67	6.849e-07	2.309e-05
Dbf4	2.969	2.918	13.48	7.637e-07	2.415e-05
Prcp	1.337	6.317	13.68	6.818e-07	2.309e-05
Mif	2.15	5.908	13.58	7.205e-07	2.337e-05
Slc25a5	1.2	8.264	13.63	7.007e-07	2.337e-05
Ncan	4.455	3.383	13.59	7.172e-07	2.337e-05
Tspan6	2.364	6.389	13.59	7.164e-07	2.337e-05
Fam111a	2.594	5.56	13.46	7.743e-07	2.429e-05
Ppp1r18	1.619	6.489	13.62	7.06e-07	2.337e-05
Sorbs2	-2.046	7.976	-13.56	7.29e-07	2.353e-05
Adcy3	2.093	4.541	13.31	8.409e-07	2.511e-05
Bmx	-4.238	5.685	-13.41	7.953e-07	2.448e-05
Rpl32	1.736	8.922	13.52	7.465e-07	2.383e-05
Eea1	-1.122	6.086	-13.59	7.155e-07	2.337e-05
Rnf149	1.63	5.513	13.47	7.661e-07	2.415e-05
Map4	-1.201	9.418	-13.45	7.775e-07	2.429e-05
Hsdl2	-1.462	4.66	-13.4	7.998e-07	2.448e-05
Pdlim3	-5.68	3.233	-13.35	8.253e-07	2.476e-05
5730409E04Rik	-1.594	4.529	-13.37	8.158e-07	2.458e-05
Pabpc4	1.365	5.53	13.48	7.632e-07	2.415e-05
Rgs7bp	-5.027	3.852	-13.18	9.13e-07	2.595e-05
Cd300lg	-4.342	2.715	-13.32	8.402e-07	2.511e-05
Ptprr	-5.409	4.581	-13.16	9.224e-07	2.609e-05
Nhp2	1.523	5.203	13.38	8.087e-07	2.454e-05
Rap2b	1.834	5.36	13.38	8.108e-07	2.454e-05
Tlr2	3.398	6.228	13.37	8.152e-07	2.458e-05
Edem1	2.122	6.402	13.48	7.641e-07	2.415e-05
Pygm	-4.44	4.533	-13.16	9.209e-07	2.609e-05
Lgals3bp	2.515	8.436	13.45	7.763e-07	2.429e-05
Arhgap4	5.16	3.306	13.67	6.833e-07	2.309e-05
Arhgap30	5.748	3.849	13.51	7.502e-07	2.387e-05
6330403A02Rik	-6.193	2.884	-13.46	7.746e-07	2.429e-05
Fbl	1.461	4.851	13.27	8.644e-07	2.548e-05
Snx21	-1.497	4.076	-13.19	9.066e-07	2.593e-05
Rps2	1.382	8.528	13.41	7.972e-07	2.448e-05
Prkg1	-2.808	5.042	-13.27	8.617e-07	2.545e-05
Vasn	-3.014	3.698	-13.07	9.704e-07	2.686e-05
Vav1	5.519	4.842	13.08	9.663e-07	2.685e-05
Ssh2	1.886	6.533	13.43	7.882e-07	2.445e-05
Slc7a7	3.052	5.615	13.23	8.847e-07	2.569e-05
Fam171a1	-1.433	6.415	-13.43	7.863e-07	2.445e-05
Nt5c2	-1.655	5.766	-13.39	8.058e-07	2.454e-05
Rrm2b	-1.62	4.467	-13.19	9.048e-07	2.593e-05
Rnf19b	2.402	5.313	13.21	8.954e-07	2.578e-05
Rasa4	2.341	4.081	13.03	9.973e-07	2.732e-05
Wasf3	-2.922	2.768	-13	1.014e-06	2.755e-05
Tmsb10	1.809	8.931	13.29	8.517e-07	2.532e-05
Evl	1.393	6.383	13.36	8.194e-07	2.463e-05
Kalrn	-2.324	4.008	-13.04	9.886e-07	2.725e-05
Slc7a8	2.517	5.871	13.22	8.903e-07	2.574e-05
Src	2.081	5.25	13.16	9.236e-07	2.609e-05
Sgpl1	2.237	6.542	13.28	8.559e-07	2.536e-05
Ssfa2	-2.304	7.34	-13.28	8.566e-07	2.536e-05
Pnpla7	3.317	4.52	12.93	1.058e-06	2.835e-05
Phf1	-2.356	4.196	-13.02	1.003e-06	2.743e-05
Ctsb	2.641	10.64	13.13	9.381e-07	2.634e-05
Htra1	-2.011	7.018	-13.26	8.696e-07	2.552e-05
Dgkg	-5.41	2.606	-13.18	9.096e-07	2.595e-05
Ppa1	1.596	5.419	13.14	9.346e-07	2.629e-05
Tmem106b	-1.126	6.883	-13.25	8.759e-07	2.556e-05
Ctnna3	-5.11	1.046	-14.44	4.456e-07	1.869e-05
Fcgr3	5.248	5.933	12.86	1.101e-06	2.886e-05
Pik3ap1	5.513	3.903	13.08	9.686e-07	2.686e-05
Gja5	-4.282	4.566	-12.87	1.095e-06	2.886e-05
Hn1l	1.361	5.406	13.11	9.517e-07	2.659e-05
Dusp2	6.06	3.895	13.22	8.866e-07	2.569e-05
Tlr4	1.864	5.033	12.99	1.019e-06	2.764e-05
Lmod1	-6.703	3.806	-12.86	1.104e-06	2.886e-05
Enpp2	-3.925	9.192	-13.03	9.964e-07	2.732e-05
Trpv4	-3.05	4.374	-12.88	1.087e-06	2.878e-05
Cdkn2b	2.23	4.863	12.92	1.061e-06	2.837e-05
Rasd1	-3.317	3.186	-12.77	1.167e-06	2.965e-05
Add3	-1.201	7.075	-13.18	9.128e-07	2.595e-05
Tmem86a	1.914	5.981	13.1	9.54e-07	2.659e-05
Trim9	4.742	3.031	13.25	8.724e-07	2.555e-05
Trim30a	1.534	6.662	13.14	9.303e-07	2.623e-05
Nap1l3	-2.637	2.374	-12.79	1.151e-06	2.954e-05
Ralgapa1	-1.054	6.133	-13.11	9.477e-07	2.655e-05
Ift57	-1.51	3.771	-12.77	1.165e-06	2.965e-05
Plekha6	-3.911	3.039	-12.7	1.212e-06	3.005e-05
BC030336	-1.373	3.951	-12.8	1.145e-06	2.948e-05
C2	3.941	4.629	12.69	1.225e-06	3.026e-05
Mcc	-2.032	3.632	-12.72	1.198e-06	2.982e-05
Ptrf	-2.625	9.306	-12.95	1.047e-06	2.811e-05
Rcc2	1.133	6.643	13.1	9.551e-07	2.659e-05
Phospho1	-2.103	4.52	-12.85	1.107e-06	2.886e-05
Rdx	-1.282	8.495	-13.01	1.01e-06	2.749e-05
Itpr1	-1.221	7.714	-13.05	9.851e-07	2.721e-05
P2rx7	1.826	5.298	12.91	1.067e-06	2.847e-05
Slc8a2	-3.319	3.284	-12.64	1.258e-06	3.078e-05
Pak4	-1.54	5.086	-12.95	1.047e-06	2.811e-05
Aplp2	-1.343	10.17	-12.86	1.106e-06	2.886e-05
Stk24	-1.278	6.462	-13.03	9.925e-07	2.73e-05
Enah	-1.608	7.032	-13.01	1.008e-06	2.749e-05
Havcr2	5.137	4.796	12.58	1.31e-06	3.157e-05
Bmp2k	2.787	5.148	12.73	1.192e-06	2.982e-05
Slfn9	4.309	3.306	12.77	1.166e-06	2.965e-05
Gnb2l1	1.382	9.797	12.85	1.107e-06	2.886e-05
Heatr1	1.42	5.544	12.89	1.081e-06	2.878e-05
Sort1	-1.228	7.776	-12.95	1.044e-06	2.811e-05
Fgr	4.169	3.787	12.6	1.294e-06	3.144e-05
Nfe2l1	-1.19	8.523	-12.89	1.085e-06	2.878e-05
Tmtc1	-3.091	5.986	-12.86	1.102e-06	2.886e-05
Crim1	-2.385	7.828	-12.89	1.084e-06	2.878e-05
Foxd1	-3.807	1.822	-12.87	1.098e-06	2.886e-05
Slc35c2	1.59	5.208	12.78	1.157e-06	2.96e-05
Cacna2d1	-3.501	3.906	-12.52	1.36e-06	3.232e-05
Cog7	-1.563	5.467	-12.84	1.116e-06	2.904e-05
Nckap5l	1.818	5.672	12.81	1.14e-06	2.938e-05
Plcl1	-1.501	4.765	-12.71	1.205e-06	2.994e-05
Lrrc32	-2.907	5.983	-12.79	1.152e-06	2.954e-05
Nov	-3.503	4.462	-12.54	1.345e-06	3.217e-05
Dstyk	-1.473	5.064	-12.73	1.193e-06	2.982e-05
Me3	-3.391	2.506	-12.46	1.405e-06	3.265e-05
Unc45a	-1.378	6.693	-12.83	1.121e-06	2.906e-05
Arhgef9	-1.371	4.326	-12.59	1.301e-06	3.15e-05
St5	-2.049	5.391	-12.73	1.195e-06	2.982e-05
Rcn2	-1.101	6.345	-12.83	1.12e-06	2.906e-05
Atoh8	-2.91	2.806	-12.39	1.475e-06	3.344e-05
Mb21d1	2.548	2.829	12.45	1.417e-06	3.275e-05
Calcrl	-2.281	6.415	-12.77	1.161e-06	2.965e-05
Ptgfr	-6.804	0.8708	-15.13	3.094e-07	1.54e-05
Cav2	-2.25	7.691	-12.75	1.176e-06	2.971e-05
Tinagl1	-3.787	6.786	-12.69	1.222e-06	3.025e-05
Amot	-1.561	5.892	-12.76	1.174e-06	2.971e-05
Npas2	-3.029	1.93	-12.52	1.361e-06	3.232e-05
Tspyl4	-1.603	4.24	-12.51	1.368e-06	3.242e-05
Ccnd2	-2.158	6.665	-12.75	1.181e-06	2.978e-05
Mamdc2	-5.171	2.235	-12.67	1.237e-06	3.045e-05
Capn2	-1.558	7.674	-12.72	1.197e-06	2.982e-05
Tll1	-3.946	1.333	-12.95	1.046e-06	2.811e-05
Tnfrsf21	1.193	6.647	12.73	1.195e-06	2.982e-05
Cald1	-3.075	8.657	-12.59	1.298e-06	3.15e-05
Gulp1	-2.825	4.287	-12.4	1.463e-06	3.344e-05
Rragd	-1.79	3.116	-12.28	1.579e-06	3.446e-05
Kcnk3	-4.797	3.1	-12.29	1.572e-06	3.446e-05
Slfn8	4.79	3.44	12.46	1.405e-06	3.265e-05
Il10ra	5.114	4.813	12.23	1.627e-06	3.521e-05
Rps18	1.42	7.492	12.67	1.241e-06	3.048e-05
Ppm1l	-1.393	5.111	-12.54	1.341e-06	3.217e-05
Serp1	1.282	7.736	12.64	1.262e-06	3.078e-05
Chic2	1.124	5.152	12.49	1.381e-06	3.247e-05
Meox1	3.806	5.496	12.33	1.533e-06	3.403e-05
C1qtnf7	-4.535	2.27	-12.38	1.479e-06	3.344e-05
Morn4	-1.292	3.797	-12.29	1.571e-06	3.446e-05
Uchl1	1.863	4.928	12.39	1.469e-06	3.344e-05
Rpl12	1.422	8.963	12.54	1.344e-06	3.217e-05
Taf9b	-1.387	5.145	-12.5	1.372e-06	3.242e-05
Kcnk6	2.681	5.05	12.33	1.525e-06	3.393e-05
Syk	4.398	4.383	12.16	1.705e-06	3.595e-05
Mpp6	2.605	5.144	12.35	1.505e-06	3.363e-05
Parp11	1.784	4.283	12.27	1.588e-06	3.458e-05
Phf11b	3.17	3.828	12.15	1.71e-06	3.595e-05
Bhlhe41	3.466	5.485	12.32	1.54e-06	3.414e-05
Plce1	-3.813	5.316	-12.37	1.492e-06	3.355e-05
Trip10	-1.056	5.339	-12.52	1.36e-06	3.232e-05
Slc12a9	1.639	4.985	12.39	1.477e-06	3.344e-05
Trib1	2.384	5.247	12.37	1.491e-06	3.355e-05
Wbp5	1.696	7.386	12.58	1.306e-06	3.157e-05
Cxcl12	-3.436	7.386	-12.5	1.37e-06	3.242e-05
Prex1	1.414	7.485	12.58	1.309e-06	3.157e-05
Gap43	5.889	4.862	12.13	1.734e-06	3.603e-05
Ctsl	1.865	8.972	12.48	1.393e-06	3.254e-05
Hey1	-1.699	5.542	-12.48	1.394e-06	3.254e-05
Efr3b	-1.302	7.453	-12.53	1.352e-06	3.228e-05
Rpl6	1.276	9.031	12.45	1.416e-06	3.275e-05
Mapre2	-1.151	7.001	-12.54	1.343e-06	3.217e-05
Gprc5b	-1.755	5.291	-12.43	1.435e-06	3.305e-05
Samd4	-2.565	3.159	-12.08	1.794e-06	3.663e-05
Mid2	-2.186	4.092	-12.2	1.663e-06	3.558e-05
Ctla2b	3.068	5.091	12.2	1.662e-06	3.558e-05
Hap1	2.82	3.324	12.05	1.828e-06	3.697e-05
Pgs1	1.573	5.5	12.38	1.479e-06	3.344e-05
Smim10l1	-1.139	7.021	-12.49	1.382e-06	3.247e-05
Pir	-1.976	5.657	-12.42	1.444e-06	3.314e-05
Chmp4c	-7.863	-1.664	-16.68	1.43e-07	1.104e-05
Ipo5	1.051	7.341	12.49	1.384e-06	3.247e-05
Ptpn1	1.457	7.159	12.49	1.386e-06	3.247e-05
Rpl35	1.244	7.233	12.49	1.386e-06	3.247e-05
Ccdc3	-4.57	4.491	-12.07	1.798e-06	3.663e-05
Cmtm3	2.13	5.609	12.31	1.543e-06	3.416e-05
Slc27a3	-3.075	2.189	-12.06	1.81e-06	3.67e-05
Gpc3	-4.423	2.455	-12.09	1.776e-06	3.644e-05
Rpl10a	1.808	7.43	12.43	1.438e-06	3.306e-05
Ndn	-1.951	4.315	-12.16	1.698e-06	3.595e-05
Syne2	-2.03	6.291	-12.39	1.468e-06	3.344e-05
Racgap1	3.177	4.002	11.97	1.922e-06	3.825e-05
Tmem246	-2.302	4.351	-12.15	1.717e-06	3.595e-05
Dnajb2	-1.858	5.049	-12.28	1.576e-06	3.446e-05
Tead3	-2.756	2.66	-11.96	1.94e-06	3.827e-05
Stard3	1.36	5.377	12.29	1.567e-06	3.446e-05
Dok1	2.414	3.737	11.96	1.939e-06	3.827e-05
Sh3bgr	-4.699	1.352	-12.62	1.273e-06	3.1e-05
Renbp	2.267	4.985	12.15	1.714e-06	3.595e-05
Prkar2a	-1.072	6.797	-12.4	1.467e-06	3.344e-05
Cacna1g	-5.571	1.011	-13.26	8.681e-07	2.552e-05
Sept8	-1.218	7.276	-12.38	1.482e-06	3.344e-05
Tmed5	1.062	7.025	12.4	1.465e-06	3.344e-05
Mfsd6	-2.368	4.977	-12.21	1.651e-06	3.556e-05
Gpr20	-6.485	1.951	-12.64	1.258e-06	3.078e-05
Fam126b	-1.511	4.2	-12.11	1.762e-06	3.639e-05
Eln	-5.673	5.958	-12.1	1.77e-06	3.644e-05
Itgb2	5.979	5.471	11.91	1.998e-06	3.892e-05
5930403L14Rik	-6.241	2.649	-12.18	1.683e-06	3.59e-05
Cry2	-1.988	3.307	-11.94	1.957e-06	3.849e-05
Atp11c	-1.153	5.936	-12.35	1.506e-06	3.363e-05
Foxo1	-1.28	6.82	-12.36	1.501e-06	3.363e-05
Ssu2	-7.357	-1.882	-16.51	1.553e-07	1.147e-05
Mrgpre	-1.354	4.849	-12.2	1.656e-06	3.558e-05
Nop2	1.418	5.152	12.2	1.663e-06	3.558e-05
Cacna1c	-3.42	3.428	-11.9	2.015e-06	3.906e-05
Cd74	8.154	8.238	12.01	1.879e-06	3.772e-05
Tlr13	4.274	4.74	11.89	2.025e-06	3.908e-05
Mylk	-4.044	8.249	-12.22	1.644e-06	3.545e-05
Plaur	4.237	3.427	11.95	1.943e-06	3.827e-05
Nek9	-1.046	7.947	-12.29	1.572e-06	3.446e-05
Fat1	-2.08	5.413	-12.22	1.638e-06	3.538e-05
Npm1	1.322	8.704	12.25	1.609e-06	3.497e-05
Celf2	2.035	5.454	12.16	1.702e-06	3.595e-05
Crtap	-1.172	6.821	-12.3	1.554e-06	3.429e-05
Pcolce2	-3.075	1.844	-11.99	1.9e-06	3.808e-05
Rab3il1	3.539	5.244	11.97	1.923e-06	3.825e-05
Med9	-1.262	5.019	-12.17	1.691e-06	3.595e-05
Nebl	-2.852	5.524	-12.16	1.705e-06	3.595e-05
Efna5	-5.611	0.793	-13.39	8.061e-07	2.454e-05
Rassf3	-1.178	7.825	-12.25	1.611e-06	3.497e-05
Lama3	-2.987	5.172	-12.09	1.778e-06	3.644e-05
Kif2c	6.628	1.556	16.1	1.897e-07	1.282e-05
Elf4	3.427	4.286	11.83	2.109e-06	4.053e-05
Syt7	-3.636	4.909	-12.01	1.876e-06	3.772e-05
St3gal5	1.481	5.792	12.19	1.667e-06	3.562e-05
Sesn2	2.339	3.278	11.78	2.177e-06	4.125e-05
Bcl2l2	-1.083	5.145	-12.14	1.722e-06	3.6e-05
Klhdc8b	-3.742	2.968	-11.76	2.202e-06	4.15e-05
Apbb1ip	4.82	4.977	11.77	2.187e-06	4.127e-05
Mas1	-6.962	-2.053	-16.33	1.691e-07	1.2e-05
Nhsl2	-1.445	5.373	-12.13	1.732e-06	3.603e-05
Pcp4l1	-3.72	8.236	-12.09	1.781e-06	3.644e-05
Rpl41	1.252	7.999	12.18	1.686e-06	3.59e-05
Fn1	1.715	12.76	11.91	1.999e-06	3.892e-05
H2-T10	1.645	5.937	12.14	1.726e-06	3.602e-05
Thsd7a	-2.653	3.174	-11.73	2.245e-06	4.224e-05
Rpl38	1.073	8.052	12.16	1.701e-06	3.595e-05
Plscr4	-2.788	4.55	-11.91	1.996e-06	3.892e-05
Thbd	-1.926	7.379	-12.15	1.713e-06	3.595e-05
Il4ra	2.426	6.624	12.13	1.736e-06	3.603e-05
Col14a1	-4.949	3.918	-11.69	2.303e-06	4.29e-05
Wdfy4	5.641	3.717	11.9	2.018e-06	3.906e-05
Nr4a2	-2.382	2.898	-11.68	2.318e-06	4.309e-05
Cd86	4.889	4.17	11.7	2.3e-06	4.29e-05
Tgfb1	1.225	7.695	12.15	1.715e-06	3.595e-05
Cep170b	-1.399	3.755	-11.8	2.148e-06	4.094e-05
Hist2h2be	-3.056	3.183	-11.68	2.325e-06	4.309e-05
Irf5	3.199	4.759	11.77	2.185e-06	4.127e-05
Rarg	-1.151	5.886	-12.12	1.747e-06	3.613e-05
Susd5	-9.036	1.967	-13.38	8.109e-07	2.454e-05
Pde1a	-4.591	3.034	-11.65	2.363e-06	4.356e-05
Tmem255b	-5.45	0.9558	-12.82	1.127e-06	2.916e-05
Il17rd	-2.189	4.763	-11.91	1.999e-06	3.892e-05
Tgfb1i1	-1.798	6.059	-12.07	1.805e-06	3.667e-05
Epha2	1.784	5.982	12.03	1.855e-06	3.74e-05
Akap11	-1.07	6.272	-12.09	1.778e-06	3.644e-05
Oas1a	2.236	5.334	11.9	2.015e-06	3.906e-05
Rdh5	-3.603	2.039	-11.72	2.256e-06	4.235e-05
Tshz1	-1.266	5.814	-12.05	1.823e-06	3.691e-05
Eif2s1	1.222	6.575	12.07	1.799e-06	3.663e-05
Fcer1g	5.547	5.2	11.59	2.468e-06	4.475e-05
Plekhh2	-1.906	3.871	-11.71	2.28e-06	4.274e-05
Hmmr	6.259	2.268	13.19	9.03e-07	2.593e-05
Vgll3	-6.692	0.1194	-14.86	3.563e-07	1.671e-05
Rgs19	1.699	4.931	11.82	2.124e-06	4.07e-05
Slc16a2	-1.987	8.166	-11.96	1.938e-06	3.827e-05
Sun1	-2.054	5.989	-11.98	1.912e-06	3.82e-05
Plk3	2.472	4.103	11.6	2.446e-06	4.459e-05
Apba1	-3.264	3.342	-11.55	2.526e-06	4.504e-05
Irf7	2.765	6.79	11.96	1.929e-06	3.827e-05
2900011O08Rik	4.532	2.139	12.28	1.58e-06	3.446e-05
Mapkapk2	1.003	7.407	12.01	1.873e-06	3.77e-05
Ahcyl2	-1.854	5.517	-11.92	1.992e-06	3.892e-05
Cct5	1.057	8.383	11.94	1.965e-06	3.858e-05
Fbxl3	-1.187	5.916	-11.96	1.931e-06	3.827e-05
Elmo1	1.18	6.291	11.97	1.919e-06	3.825e-05
Cyba	1.869	6.783	11.95	1.941e-06	3.827e-05
Slc25a35	-2.011	2.331	-11.48	2.66e-06	4.617e-05
Synpo2	-4.682	4.39	-11.54	2.544e-06	4.522e-05
Syt15	-4.25	4.484	-11.57	2.491e-06	4.489e-05
Nr3c1	-1.588	7.567	-11.92	1.989e-06	3.892e-05
Ap1g2	1.707	3.257	11.47	2.675e-06	4.621e-05
Rnf125	-2.714	3.913	-11.57	2.497e-06	4.492e-05
Aif1	6.878	5.085	11.47	2.668e-06	4.621e-05
Ccdc109b	-2.185	2.864	-11.44	2.721e-06	4.663e-05
F2rl1	-5.238	2.372	-11.58	2.476e-06	4.475e-05
Agtr1b	-6.435	-2.283	-15.74	2.267e-07	1.392e-05
Hrc	-7.275	0.9545	-13.4	7.99e-07	2.448e-05
Ubash3b	4.387	3.257	11.53	2.571e-06	4.53e-05
Slc9a2	-3.46	3.305	-11.41	2.782e-06	4.704e-05
Dip2c	-1.507	4.633	-11.7	2.298e-06	4.29e-05
Foxp1	-1.6	6.841	-11.88	2.041e-06	3.935e-05
Axin2	-1.514	4.709	-11.69	2.305e-06	4.29e-05
Gm20300	-1.594	3.181	-11.42	2.76e-06	4.676e-05
Lpcat2	3.367	5.916	11.67	2.345e-06	4.329e-05
Ccr5	4.07	5.483	11.53	2.573e-06	4.53e-05
Idh2	-1.491	5.552	-11.8	2.153e-06	4.097e-05
Cbfa2t3	-1.717	5.969	-11.82	2.119e-06	4.066e-05
Foxo4	-1.349	5.668	-11.8	2.14e-06	4.088e-05
Igsf8	2.108	6.314	11.78	2.175e-06	4.125e-05
Mgat4a	1.514	6.019	11.79	2.168e-06	4.121e-05
Srl	-4.54	3.065	-11.33	2.928e-06	4.857e-05
Gstt3	-1.805	3.109	-11.36	2.883e-06	4.806e-05
Tor2a	1.101	4.711	11.6	2.457e-06	4.466e-05
Cd24a	-3.016	4.793	-11.56	2.512e-06	4.497e-05
Sipa1	1.262	7.311	11.81	2.133e-06	4.081e-05
Chst1	6.039	4.883	11.31	2.984e-06	4.915e-05
Foxc2	-5.026	0.5056	-12.64	1.261e-06	3.078e-05
Adgrg3	2.298	3.102	11.29	3.016e-06	4.95e-05
Gm16576	-3.023	1.74	-11.41	2.784e-06	4.704e-05
Rras	-1.372	6.567	-11.77	2.183e-06	4.127e-05
2010111I01Rik	-1.239	5.2	-11.67	2.344e-06	4.329e-05
Tmsb4x	1.838	12.04	11.49	2.636e-06	4.597e-05
Sla	4.59	4.924	11.29	3.02e-06	4.95e-05
Tpm3	1.461	8.429	11.7	2.293e-06	4.29e-05
Lrp4	1.575	5.076	11.57	2.504e-06	4.492e-05
Cys1	-4.767	0.2707	-12.76	1.171e-06	2.97e-05
Npr2	-1.819	4.073	-11.43	2.742e-06	4.676e-05
Arhgap6	-3.031	3.301	-11.27	3.064e-06	4.984e-05
Pag1	2.319	5.119	11.51	2.609e-06	4.563e-05
Grb14	-2.035	5.176	-11.61	2.44e-06	4.455e-05
Gucy1a3	-3.978	5.436	-11.51	2.602e-06	4.561e-05
Mpdz	-1.273	5.539	-11.67	2.339e-06	4.329e-05
Dact3	-2.444	2.823	-11.23	3.153e-06	5.051e-05
Fads3	-2.13	4.857	-11.54	2.546e-06	4.522e-05
Rps6ka5	-2.157	3.591	-11.28	3.031e-06	4.956e-05
Steap2	-3.58	2.225	-11.23	3.142e-06	5.041e-05
Bcam	-2.682	8.74	-11.57	2.506e-06	4.492e-05
Bin2	5.631	4.75	11.18	3.261e-06	5.172e-05
Slc16a6	2.608	5.392	11.47	2.67e-06	4.621e-05
Ttl	-1.398	5.076	-11.56	2.515e-06	4.497e-05
Dok3	4.187	2.33	11.56	2.519e-06	4.497e-05
Fam78a	4.202	2.022	11.73	2.247e-06	4.224e-05
Bex2	4.327	2.766	11.38	2.838e-06	4.761e-05
Inpp4b	-3.158	5.723	-11.53	2.572e-06	4.53e-05
Sox13	-2.667	6.255	-11.59	2.458e-06	4.466e-05
Olfml2a	-3.481	4.392	-11.32	2.965e-06	4.901e-05
Rbpms	-1.655	6.197	-11.63	2.395e-06	4.398e-05
Stk38l	-2.132	4.379	-11.38	2.831e-06	4.755e-05
Fbxl22	-4.968	1.73	-11.46	2.691e-06	4.639e-05
Cped1	-3.559	4.008	-11.23	3.142e-06	5.041e-05
Gucy1a2	-3.125	3.542	-11.18	3.253e-06	5.169e-05
Cd99l2	-1.161	6.43	-11.63	2.395e-06	4.398e-05
Klf12	-1.379	5.258	-11.54	2.555e-06	4.526e-05
Ezh1	-1.523	6.411	-11.62	2.419e-06	4.436e-05
Rfk	-1.673	6.853	-11.61	2.429e-06	4.448e-05
Eif4e2	1.147	6.051	11.6	2.448e-06	4.459e-05
Apbb1	-1.713	5.349	-11.53	2.564e-06	4.53e-05
Polr1c	1.062	5.341	11.51	2.594e-06	4.554e-05
Fam213a	-1.439	4.798	-11.45	2.701e-06	4.639e-05
Cacna1h	-1.818	4.615	-11.41	2.787e-06	4.704e-05
Sema3g	-2.968	7.74	-11.54	2.553e-06	4.526e-05
Klhl23	-1.528	4.808	-11.45	2.715e-06	4.657e-05
Ldb3	-6.079	1.784	-11.58	2.476e-06	4.475e-05
Dzip1l	-2.932	1.627	-11.22	3.166e-06	5.068e-05
Adarb1	-1.202	4.887	-11.46	2.698e-06	4.639e-05
Cxcl10	4.711	4.399	11.08	3.482e-06	5.399e-05
Clec5a	5.324	3.219	11.32	2.955e-06	4.891e-05
Top2a	6.069	4.507	11.11	3.422e-06	5.328e-05
Wdr19	-1.597	3.393	-11.17	3.283e-06	5.19e-05
Aktip	-1.38	5.417	-11.51	2.593e-06	4.554e-05
Marcks	1.768	7.633	11.57	2.5e-06	4.492e-05
Cmss1	-1.412	3.896	-11.24	3.114e-06	5.039e-05
Cfl1	1.23	9.909	11.42	2.755e-06	4.676e-05
Ap1ar	-1.093	4.62	-11.38	2.83e-06	4.755e-05
Myo16	3.698	1.8	11.59	2.472e-06	4.475e-05
Igsf1	-6.679	-2.173	-14.45	4.421e-07	1.864e-05
Ctsa	2.021	8.585	11.5	2.626e-06	4.587e-05
Adamts9	3.28	5.454	11.28	3.028e-06	4.956e-05
Rasal3	5.575	3.843	11.12	3.381e-06	5.285e-05
Pacsin3	-2.652	2.578	-11.01	3.665e-06	5.564e-05
Adamts15	-4.74	2.691	-11.04	3.593e-06	5.502e-05
Tef	-1.136	5.596	-11.48	2.661e-06	4.617e-05
Umps	1.32	4.621	11.27	3.066e-06	4.984e-05
Unc13c	-5.003	0.7637	-11.89	2.019e-06	3.906e-05
Limd1	-1.198	6.432	-11.51	2.605e-06	4.561e-05
Spr	-1.078	5.686	-11.47	2.676e-06	4.621e-05
Hyal1	-2.258	4.116	-11.17	3.274e-06	5.185e-05
Rpl23	1.283	9.129	11.39	2.814e-06	4.743e-05
Nme1	1.273	5.829	11.42	2.754e-06	4.676e-05
Apex1	1.761	4.831	11.23	3.135e-06	5.041e-05
Mcm3	1.357	5.602	11.39	2.825e-06	4.755e-05
Bcl2a1a	8.451	-0.3307	15.87	2.124e-07	1.355e-05
Mecom	-1.245	6.426	-11.46	2.697e-06	4.639e-05
Coro7	1.201	5.532	11.36	2.87e-06	4.797e-05
Eml2	-1.663	5.337	-11.35	2.894e-06	4.814e-05
Gmip	3.581	3.786	10.92	3.907e-06	5.817e-05
Fam129a	1.866	7.114	11.43	2.751e-06	4.676e-05
Cab39l	-1.29	6.33	-11.43	2.745e-06	4.676e-05
Efhd2	1.786	7.533	11.42	2.757e-06	4.676e-05
Tgfb2	-2.591	6.099	-11.36	2.879e-06	4.805e-05
Mfap1a	-1.013	4.878	-11.29	3.02e-06	4.95e-05
Sdr39u1	-2.107	3.552	-11.01	3.648e-06	5.551e-05
Nynrin	-1.834	5.442	-11.34	2.923e-06	4.856e-05
Themis2	5.519	2.752	11.37	2.851e-06	4.776e-05
Armcx1	-1.724	3.89	-11.07	3.505e-06	5.418e-05
Arntl	-1.358	4.781	-11.24	3.127e-06	5.041e-05
Col4a3bp	-1.714	7.451	-11.37	2.855e-06	4.777e-05
Fbxl2	-1.58	3.513	-10.99	3.72e-06	5.61e-05
Cdc42bpg	-2.619	3.389	-10.93	3.862e-06	5.786e-05
9430020K01Rik	-1.424	10.23	-11.18	3.262e-06	5.172e-05
Clic5	-3.696	6.29	-11.24	3.115e-06	5.039e-05
Cx3cl1	-2.32	6.273	-11.31	2.977e-06	4.908e-05
Eef1b2	1.333	8.853	11.28	3.044e-06	4.972e-05
Sdc3	1.569	8.901	11.27	3.05e-06	4.975e-05
Card9	5.318	1.684	12.09	1.78e-06	3.644e-05
Gpx8	-2.52	3.981	-10.99	3.716e-06	5.61e-05
Prkcb	2.775	6.199	11.23	3.137e-06	5.041e-05
Trim27	1.138	5.599	11.27	3.066e-06	4.984e-05
Tprgl	-1.001	7.71	-11.3	2.988e-06	4.916e-05
Sav1	-1.006	6.204	-11.33	2.931e-06	4.857e-05
Mthfd1l	1.846	4.048	10.92	3.886e-06	5.815e-05
Olfml3	4.271	7.114	11.17	3.285e-06	5.19e-05
Ifi204	5.329	3.928	10.81	4.221e-06	6.066e-05
Thop1	1.219	4.989	11.13	3.373e-06	5.285e-05
Plod1	1.427	8.503	11.24	3.114e-06	5.039e-05
Epb4.1l4a	-3.742	2.068	-10.82	4.185e-06	6.062e-05
Eva1a	2.437	3.774	10.82	4.194e-06	6.062e-05
Slc39a12	-5.665	1.086	-11.48	2.66e-06	4.617e-05
AI597479	-1.04	4.18	-11.02	3.632e-06	5.532e-05
B3galnt2	-1.539	4.327	-11.04	3.595e-06	5.502e-05
Gja4	-2.665	6.573	-11.23	3.142e-06	5.041e-05
Sox2	3.778	4.028	10.76	4.35e-06	6.183e-05
Rnf180	3.71	2.416	10.91	3.911e-06	5.817e-05
Kat6b	-1.195	4.697	-11.09	3.45e-06	5.358e-05
Eef1e1	1.884	3.909	10.84	4.119e-06	6.006e-05
Map1lc3a	-1.241	5.982	-11.24	3.119e-06	5.039e-05
Cpne2	-1.296	4.573	-11.05	3.57e-06	5.494e-05
Mfge8	-1.882	8.508	-11.15	3.325e-06	5.223e-05
Itgal	5.181	4.361	10.69	4.577e-06	6.39e-05
Prss23	-2.132	7.476	-11.18	3.248e-06	5.169e-05
Spint2	-3.17	4.696	-10.94	3.83e-06	5.744e-05
Syt4	7.6	4.088	11.02	3.629e-06	5.532e-05
Akt3	-1.044	6.677	-11.21	3.179e-06	5.076e-05
Nt5c	1.158	4.7	10.98	3.724e-06	5.61e-05
Arvcf	-2.033	4.405	-10.95	3.822e-06	5.738e-05
Ramp1	-2.307	2.837	-10.67	4.639e-06	6.439e-05
Inadl	-2.824	3.008	-10.68	4.632e-06	6.439e-05
Lef1	-1.278	6.301	-11.18	3.253e-06	5.169e-05
Pfn1	1.669	8.547	11.12	3.382e-06	5.285e-05
Crmp1	5.608	2.307	11.35	2.89e-06	4.812e-05
Loxl1	-3.405	1.2	-10.88	3.998e-06	5.905e-05
Nln	1.631	3.934	10.76	4.349e-06	6.183e-05
Rps6ka1	1.813	7.164	11.15	3.313e-06	5.21e-05
Des	-3.493	6.476	-11.06	3.533e-06	5.448e-05
Pfkfb3	2.623	6.097	11.04	3.58e-06	5.498e-05
Adm	4.556	4.31	10.62	4.824e-06	6.603e-05
Speg	-1.431	4.405	-10.91	3.917e-06	5.817e-05
Rprm	5.55	1.481	12.13	1.739e-06	3.603e-05
Hspb7	-5.786	1.774	-10.9	3.938e-06	5.836e-05
Car7	-3.038	1.526	-10.7	4.539e-06	6.366e-05
Tmem119	3.55	6.929	11.03	3.614e-06	5.523e-05
Cd53	4.57	5.919	10.81	4.223e-06	6.066e-05
Lgals9	1.678	8.35	11.08	3.485e-06	5.399e-05
Kifc1	4.521	1.044	11.98	1.908e-06	3.818e-05
Mkl2	-1.548	7.088	-11.11	3.423e-06	5.328e-05
Taf1a	-2.468	2.859	-10.6	4.891e-06	6.65e-05
Tmem38b	-1.957	4.395	-10.86	4.052e-06	5.951e-05
Sstr4	-5.824	-0.1992	-12.67	1.237e-06	3.045e-05
Fam110b	-2.69	1.999	-10.57	4.994e-06	6.729e-05
Pik3r3	-1.673	6.389	-11.08	3.491e-06	5.403e-05
Impact	-1.271	5.214	-10.99	3.704e-06	5.61e-05
Foxs1	-3.025	3.105	-10.57	4.987e-06	6.729e-05
Ppp3cc	-1.395	4.433	-10.86	4.077e-06	5.966e-05
Ikzf1	4.879	4.565	10.55	5.071e-06	6.765e-05
Prom1	-2.258	8.984	-10.95	3.821e-06	5.738e-05
Cd33	4.128	3.761	10.53	5.148e-06	6.798e-05
Slc24a4	-5.935	-2.493	-13.59	7.181e-07	2.337e-05
Acss2	-1.475	2.784	-10.55	5.071e-06	6.765e-05
Slc44a1	-1.357	6.39	-11.05	3.554e-06	5.475e-05
Sulf1	-2.265	4.857	-10.86	4.051e-06	5.951e-05
Fam20a	-3.116	3.229	-10.55	5.083e-06	6.765e-05
Apobec3	1.655	4.593	10.77	4.336e-06	6.183e-05
Stat2	1.078	6.268	11.04	3.581e-06	5.498e-05
Lmod3	-6.389	-2.295	-13.23	8.86e-07	2.569e-05
Myof	-1.431	7.357	-11.02	3.632e-06	5.532e-05
Fgf11	-2.228	2.783	-10.51	5.201e-06	6.834e-05
Ankrd6	-1.901	3.991	-10.71	4.535e-06	6.366e-05
Rpl27	1.178	7.232	11.04	3.589e-06	5.502e-05
Tnc	5.86	3.547	10.64	4.767e-06	6.57e-05
Nkd2	-1.49	4.562	-10.82	4.182e-06	6.062e-05
Zfp385a	2.224	5.1	10.8	4.253e-06	6.097e-05
Tmem72	-9.114	-0.7324	-12.46	1.406e-06	3.265e-05
Wfs1	-1.168	4.987	-10.89	3.992e-06	5.903e-05
Rhog	1.708	6.543	10.99	3.72e-06	5.61e-05
Slc6a17	-3.513	4.404	-10.66	4.683e-06	6.486e-05
Daam2	-3.509	5.471	-10.82	4.191e-06	6.062e-05
Dhcr24	-1.629	5.761	-10.95	3.821e-06	5.738e-05
Grip2	-8.677	0.176	-12.37	1.494e-06	3.356e-05
Parp9	1.046	6.753	11	3.687e-06	5.592e-05
Asb2	-2.841	4.554	-10.71	4.526e-06	6.36e-05
Ccdc82	-1.501	5.089	-10.86	4.055e-06	5.951e-05
Tceal1	-1.482	3.749	-10.62	4.825e-06	6.603e-05
Gpc4	-2.968	3.675	-10.55	5.083e-06	6.765e-05
Vcl	-1.643	8.163	-10.91	3.914e-06	5.817e-05
Lmcd1	-2.801	4.512	-10.7	4.545e-06	6.366e-05
Sptb	-3.286	1.804	-10.48	5.332e-06	6.927e-05
Tns1	-2.561	9.201	-10.83	4.148e-06	6.041e-05
Fbxo32	-2.002	4.933	-10.81	4.218e-06	6.066e-05
March1	4.303	3.601	10.43	5.549e-06	7.114e-05
1700017B05Rik	2.353	4.98	10.71	4.526e-06	6.36e-05
Flna	-1.806	10.56	-10.75	4.382e-06	6.216e-05
Adamtsl5	-3.974	1.712	-10.53	5.144e-06	6.798e-05
Atp2a2	-1.507	8.999	-10.85	4.099e-06	5.989e-05
Wipf3	-6.335	-0.2522	-12.44	1.43e-06	3.298e-05
Cd2ap	-1.31	7.936	-10.91	3.917e-06	5.817e-05
Rbm24	-6.31	0.9558	-11.25	3.108e-06	5.039e-05
Nudt12	-1.582	3.165	-10.48	5.319e-06	6.923e-05
Fmo1	-6.376	3.732	-10.4	5.668e-06	7.192e-05
Triqk	-1.87	2.186	-10.4	5.668e-06	7.192e-05
Zfp37	-1.907	3.057	-10.46	5.422e-06	7.016e-05
Ehd3	-1.914	5.375	-10.84	4.119e-06	6.006e-05
Gpt2	2.373	3.353	10.41	5.614e-06	7.168e-05
Rnf167	-1.733	5.684	-10.88	4.005e-06	5.908e-05
Vat1l	-3.968	3.731	-10.45	5.446e-06	7.035e-05
Fgf1	-6.16	3.344	-10.39	5.709e-06	7.205e-05
Thsd4	-3.482	3.915	-10.51	5.235e-06	6.846e-05
Atp1a3	6.154	4.525	10.39	5.711e-06	7.205e-05
Igfn1	-6.307	-2.342	-12.98	1.023e-06	2.768e-05
Nfat5	-1.091	7.071	-10.91	3.921e-06	5.817e-05
Prelid1	1.17	6.927	10.92	3.902e-06	5.817e-05
Amigo1	-1.725	3.664	-10.53	5.159e-06	6.8e-05
Spag5	5.649	1.413	11.86	2.063e-06	3.97e-05
Cdkn1c	-2.618	6.135	-10.83	4.163e-06	6.056e-05
Arhgap31	-1.231	8.376	-10.82	4.175e-06	6.062e-05
Tcf19	2.368	3.755	10.41	5.623e-06	7.168e-05
Glul	-1.097	9.896	-10.72	4.499e-06	6.346e-05
Plcb2	5.564	3.166	10.52	5.2e-06	6.834e-05
Slc22a17	-2.215	5.809	-10.8	4.229e-06	6.068e-05
Polk	-1.85	5.642	-10.81	4.216e-06	6.066e-05
Lypd1	-3.547	2.964	-10.33	5.959e-06	7.431e-05
Psat1	2.321	6.053	10.77	4.33e-06	6.183e-05
Smim22	-5.607	-2.636	-13.31	8.444e-07	2.516e-05
Prkaa2	-4.186	2.499	-10.31	6.024e-06	7.468e-05
Rpl24	1.037	7.272	10.85	4.079e-06	5.966e-05
Csf2rb	3.583	5.475	10.55	5.067e-06	6.765e-05
Ltbp3	-1.57	5.302	-10.75	4.383e-06	6.216e-05
2810013P06Rik	-1.783	3.731	-10.47	5.37e-06	6.968e-05
Sdcbp	1.221	9.072	10.75	4.391e-06	6.222e-05
Pla2r1	-2.695	3.444	-10.38	5.728e-06	7.22e-05
Rassf2	3.312	4.835	10.46	5.431e-06	7.022e-05
St6galnac4	1.455	5.812	10.77	4.337e-06	6.183e-05
Arhgef18	-1.046	5.411	-10.77	4.338e-06	6.183e-05
Nkx6-1	-7.836	-0.3086	-12.07	1.801e-06	3.663e-05
Gabpb2	-1.054	5.465	-10.76	4.35e-06	6.183e-05
E130012A19Rik	3.489	1.979	10.48	5.325e-06	6.924e-05
Kcnk1	-4.586	1.599	-10.43	5.541e-06	7.114e-05
Kcnh2	-3.275	1.347	-10.39	5.701e-06	7.205e-05
Smco4	-1.803	4.213	-10.53	5.159e-06	6.8e-05
P4ha2	-1.742	3.608	-10.41	5.623e-06	7.168e-05
Gprasp1	-1.78	5.134	-10.67	4.637e-06	6.439e-05
Copz2	-1.658	4.85	-10.63	4.773e-06	6.572e-05
Osgin1	3.326	3.389	10.23	6.393e-06	7.717e-05
Prob1	-4.261	0.8767	-10.63	4.79e-06	6.581e-05
Atp2b3	-8.419	1.235	-11.55	2.539e-06	4.521e-05
Prkci	-1.172	4.92	-10.64	4.76e-06	6.567e-05
Sgpp2	-3.324	5.88	-10.64	4.737e-06	6.541e-05
Ankmy2	-1.025	4.999	-10.65	4.725e-06	6.531e-05
Gng2	1.665	5.615	10.66	4.678e-06	6.486e-05
Gypc	-2.165	2.941	-10.24	6.348e-06	7.695e-05
AW554918	-1.479	3.732	-10.39	5.709e-06	7.205e-05
Fgfr2	-4.485	1.332	-10.42	5.574e-06	7.139e-05
Fam135a	-1.329	4.329	-10.5	5.251e-06	6.859e-05
Srms	-2.151	2.775	-10.22	6.477e-06	7.768e-05
Gm684	-4.579	1.528	-10.36	5.811e-06	7.311e-05
Adamts5	-1.587	3.139	-10.27	6.225e-06	7.621e-05
Pcsk5	-6.179	1.435	-10.63	4.781e-06	6.576e-05
Nat6	-1.472	4.704	-10.55	5.07e-06	6.765e-05
Csf2ra	4.717	4.266	10.17	6.683e-06	7.862e-05
Hyal2	-1.251	6.206	-10.72	4.492e-06	6.345e-05
Kpna2	2.023	4.538	10.41	5.624e-06	7.168e-05
Hspa2	-1.899	3.731	-10.34	5.893e-06	7.39e-05
Nfam1	3.047	5.097	10.41	5.596e-06	7.16e-05
Islr	-3.832	2.366	-10.15	6.779e-06	7.934e-05
Neurl1a	3.729	3.589	10.15	6.796e-06	7.94e-05
Nos1	-3.735	5.942	-10.56	5.022e-06	6.749e-05
Tfdp2	-1.054	4.924	-10.57	5.001e-06	6.729e-05
Rasgrf2	-4.426	2.89	-10.13	6.915e-06	8.033e-05
Cpxm2	-5.333	0.9937	-10.62	4.824e-06	6.603e-05
Heyl	-3.788	5.114	-10.44	5.504e-06	7.081e-05
Msh2	-1.002	5.27	-10.6	4.894e-06	6.65e-05
Hemk1	-1.432	3.774	-10.32	5.978e-06	7.432e-05
Igfbp2	-5.192	4.298	-10.2	6.533e-06	7.8e-05
Hs3st1	-3.024	5.305	-10.51	5.23e-06	6.846e-05
Cfap70	-5.678	-2.609	-12.74	1.188e-06	2.982e-05
Cbx7	-3.788	3.474	-10.16	6.756e-06	7.923e-05
Ckap2l	4.519	2.692	10.23	6.418e-06	7.717e-05
Slc22a18	-2.399	1.642	-10.12	6.956e-06	8.046e-05
Wnt7b	4.929	2.097	10.54	5.097e-06	6.776e-05
Liph	5.082	1.375	11.12	3.384e-06	5.285e-05
Tcta	-1.524	4.81	-10.49	5.305e-06	6.911e-05
Slco4a1	5.058	2.002	10.61	4.867e-06	6.64e-05
Cntln	-1.02	4.763	-10.49	5.299e-06	6.91e-05
Cndp1	-6.202	-2.373	-12.35	1.509e-06	3.363e-05
BC037034	3.74	3.467	10.07	7.21e-06	8.231e-05
Tuba1a	1.138	8.592	10.57	4.997e-06	6.729e-05
Ccdc88b	5.633	3.677	10.12	6.957e-06	8.046e-05
Kirrel	-3.117	4.052	-10.24	6.348e-06	7.695e-05
Phc3	-1.417	5.87	-10.59	4.938e-06	6.686e-05
Ythdf2	1.019	6.098	10.6	4.904e-06	6.657e-05
Tlr7	4.803	4.688	10.08	7.151e-06	8.2e-05
Sfxn3	-1.477	5.984	-10.58	4.946e-06	6.687e-05
Arl15	-1.27	5.952	-10.59	4.933e-06	6.686e-05
Noc2l	1.143	5.78	10.55	5.066e-06	6.765e-05
Ubl4a	-1.339	4.32	-10.36	5.835e-06	7.334e-05
Pycard	3.668	4.9	10.19	6.593e-06	7.804e-05
Phlpp1	-1.038	5.249	-10.51	5.222e-06	6.843e-05
Psd4	5.371	2.517	10.37	5.79e-06	7.292e-05
Iars	1.044	6.308	10.59	4.94e-06	6.686e-05
Apol9a	3.47	2.508	10.08	7.193e-06	8.231e-05
Gmpr	1.644	5.831	10.51	5.209e-06	6.835e-05
Slco2b1	1.267	8.419	10.53	5.145e-06	6.798e-05
Gpr161	-2.856	0.8389	-10.24	6.371e-06	7.715e-05
Prickle2	-2.454	3.792	-10.19	6.606e-06	7.806e-05
Slfn1	7.151	-1.06	13.21	8.925e-07	2.575e-05
Flot2	-1.248	5.646	-10.53	5.132e-06	6.797e-05
Zkscan8	-1.192	5.025	-10.45	5.455e-06	7.039e-05
Xirp1	-6.548	1.07	-10.69	4.575e-06	6.39e-05
Map6	-1.526	4.943	-10.43	5.55e-06	7.114e-05
1700020I14Rik	-1.092	5.992	-10.55	5.079e-06	6.765e-05
Ogfr	1.136	6.387	10.56	5.04e-06	6.765e-05
Lats2	-1.189	7.085	-10.54	5.114e-06	6.784e-05
Atp1b2	-3.2	7.325	-10.47	5.374e-06	6.968e-05
Cdh6	-2.681	3.117	-10.03	7.442e-06	8.413e-05
Tprkb	-1.045	4.566	-10.34	5.904e-06	7.392e-05
Crebl2	-2.752	3.515	-10.08	7.175e-06	8.221e-05
Melk	4.912	1.671	10.6	4.881e-06	6.646e-05
Atad2	1.815	4.152	10.15	6.784e-06	7.934e-05
Runx1t1	-3.857	0.93	-10.21	6.506e-06	7.795e-05
Fstl3	-3.209	1.706	-9.981	7.727e-06	8.621e-05
Slc28a3	-5.692	-2.594	-12.35	1.51e-06	3.363e-05
Scn4b	-4.665	3.822	-10.01	7.541e-06	8.497e-05
Tgif1	1.989	4.827	10.25	6.314e-06	7.685e-05
Mecp2	-1.264	6.213	-10.5	5.255e-06	6.859e-05
Naalad2	-1.971	4.428	-10.26	6.265e-06	7.648e-05
Sorbs1	-2.48	7.17	-10.46	5.407e-06	7.004e-05
Acad8	-1.154	4.596	-10.31	6.04e-06	7.474e-05
Plch1	2.8	3.05	9.925	8.063e-06	8.872e-05
Slc2a6	4.595	3.993	9.914	8.131e-06	8.896e-05
Rps11	1.369	9.078	10.39	5.68e-06	7.199e-05
Eif4ebp1	1.803	4.606	10.2	6.565e-06	7.8e-05
Evc	-2.588	3.78	-10.07	7.214e-06	8.231e-05
Ubtd1	1.739	5.41	10.33	5.941e-06	7.419e-05
Socs3	2.994	6.718	10.39	5.695e-06	7.205e-05
Enpp4	-1.79	6.322	-10.44	5.485e-06	7.069e-05
Mrgprf	-6.488	2.057	-10.07	7.214e-06	8.231e-05
Fmo2	-4.163	3.931	-9.999	7.621e-06	8.53e-05
Plk5	-5.347	-2.748	-12.45	1.417e-06	3.275e-05
Ptpn21	-1.824	4.363	-10.2	6.532e-06	7.8e-05
Ldb2	-2.382	4.463	-10.19	6.616e-06	7.808e-05
Azin1	-1.112	7.26	-10.44	5.489e-06	7.069e-05
Eps8l2	-4.131	5.92	-10.27	6.204e-06	7.602e-05
Tmcc2	-2.037	4.465	-10.2	6.575e-06	7.8e-05
Cep126	-2.554	1.176	-9.95	7.908e-06	8.772e-05
Sec22c	-1.177	3.846	-10.09	7.118e-06	8.175e-05
Bcl2	1.01	4.664	10.2	6.553e-06	7.8e-05
Gprc5c	-4.411	4.325	-9.992	7.661e-06	8.568e-05
Rsph4a	-6.454	-1.174	-11.42	2.757e-06	4.676e-05
Rabgap1l	-1.185	5.339	-10.33	5.971e-06	7.432e-05
Fyb	5.049	4.824	9.863	8.453e-06	9.175e-05
Clec14a	-1.807	8.104	-10.33	5.961e-06	7.431e-05
Arhgap25	1.856	5.32	10.23	6.411e-06	7.717e-05
Ccdc86	1.592	4.734	10.14	6.876e-06	7.999e-05
Tesc	-4.198	2.205	-9.799	8.88e-06	9.464e-05
Hacl1	-1.572	3.272	-9.911	8.147e-06	8.906e-05
Ephx3	-4.23	2.338	-9.782	8.994e-06	9.532e-05
Olfm1	1.07	5.268	10.24	6.34e-06	7.695e-05
Twsg1	-1.322	6.035	-10.34	5.908e-06	7.392e-05
Etv5	2.56	4.138	9.919	8.099e-06	8.884e-05
Plxdc2	1.956	6.507	10.32	5.978e-06	7.432e-05
Spef1	-1.351	4.043	-10.05	7.32e-06	8.319e-05
Trafd1	1.055	6.104	10.33	5.94e-06	7.419e-05
Zfp367	-1.38	4.696	-10.17	6.713e-06	7.891e-05
Cebpa	3.165	5.252	10.05	7.317e-06	8.319e-05
Ndrg2	-2.614	5.778	-10.25	6.323e-06	7.685e-05
Fgd5	-1.007	7.895	-10.3	6.096e-06	7.524e-05
Arpc3	1.201	7.751	10.32	5.993e-06	7.437e-05
Naip5	4.036	1.748	10.06	7.262e-06	8.278e-05
Wdr72	-6.129	-2.402	-11.68	2.323e-06	4.309e-05
Mpp7	-1.493	4.029	-10.02	7.514e-06	8.473e-05
Kit	3.315	5.174	10	7.592e-06	8.517e-05
Lrrc48	-3.306	0.571	-10.05	7.334e-06	8.326e-05
Tgfbr3	-2.228	5.779	-10.25	6.323e-06	7.685e-05
Dmp1	-2.748	1.706	-9.75	9.217e-06	9.686e-05
Acp6	2.021	3.673	9.842	8.591e-06	9.28e-05
Cd14	3.494	5.938	10.11	7.017e-06	8.107e-05
Ssr4	1.499	6.246	10.29	6.122e-06	7.54e-05
Ifngr2	1.904	6.218	10.26	6.245e-06	7.638e-05
Ifi27l2a	5.645	4.757	9.742	9.28e-06	9.724e-05
Rps12	1.239	9.476	10.19	6.579e-06	7.8e-05
Ap1s1	1.069	6.288	10.31	6.057e-06	7.482e-05
Trp53inp2	-1.098	7.485	-10.29	6.128e-06	7.54e-05
Rbbp9	-1.063	5.293	-10.23	6.414e-06	7.717e-05
Aldh18a1	1.787	5.635	10.2	6.556e-06	7.8e-05
Cdkn2a	8.39	1.19	12.13	1.737e-06	3.603e-05
Abhd15	4.169	2.171	9.897	8.233e-06	8.979e-05
Aggf1	-1.14	6.108	-10.29	6.12e-06	7.54e-05
Hapln1	-7.247	-0.767	-11.12	3.401e-06	5.305e-05
Gata6	-4.697	0.5175	-10.22	6.441e-06	7.739e-05
Khdrbs3	-1.13	5.247	-10.2	6.566e-06	7.8e-05
Snx5	1.813	7.678	10.26	6.272e-06	7.65e-05
Alg8	1.829	3.081	9.722	9.42e-06	9.791e-05
Nid1	2.122	8.901	10.19	6.619e-06	7.808e-05
Mak16	1.047	5.273	10.15	6.803e-06	7.941e-05
Cd68	5.146	5.726	9.848	8.547e-06	9.244e-05
Clic4	-1.134	9.813	-10.09	7.106e-06	8.175e-05
Cdca2	5.355	1.442	10.54	5.117e-06	6.784e-05
AA467197	9.004	-0.01348	12.04	1.842e-06	3.719e-05
Mapk6	1.307	6.222	10.23	6.412e-06	7.717e-05
Ndc80	3.395	2.455	9.692	9.644e-06	9.95e-05
Aph1b	-3.095	3.232	-9.732	9.352e-06	9.777e-05
Alx1	-7.035	-2.012	-11.21	3.193e-06	5.092e-05
Clec2d	-1.535	4.1	-9.947	7.927e-06	8.779e-05
Elac1	-1.344	4.078	-9.947	7.927e-06	8.779e-05
Sulf2	2.154	6.067	10.16	6.763e-06	7.923e-05
Iqub	-6.831	-1.707	-11.16	3.306e-06	5.21e-05
Adcy6	-1.623	6.157	-10.21	6.517e-06	7.8e-05
Zfp385c	-4.026	0.03129	-10.31	6.037e-06	7.474e-05
Efnb2	-2.099	5.664	-10.14	6.846e-06	7.978e-05
Ccdc113	-7.009	-2.023	-11.16	3.309e-06	5.21e-05
Ifi44	2.332	6.083	10.12	6.957e-06	8.046e-05
Gbp6	2.605	4.53	9.839	8.607e-06	9.286e-05
Sox10	3.325	4.767	9.802	8.859e-06	9.464e-05
Elovl4	-1.806	3.089	-9.711	9.503e-06	9.842e-05
Stat1	1.658	8.455	10.14	6.86e-06	7.987e-05
Smarca2	-1.214	7.72	-10.16	6.764e-06	7.923e-05
Ccdc22	1.031	4.885	10.01	7.554e-06	8.504e-05
E2f3	1.172	3.966	9.823	8.713e-06	9.353e-05
Sgca	-5.337	0.9198	-9.979	7.739e-06	8.627e-05
Ltbp4	-3.906	9.19	-10.02	7.475e-06	8.443e-05
Rarres2	-2.961	3.724	-9.761	9.145e-06	9.634e-05
Vgf	10.91	2.788	11.8	2.142e-06	4.088e-05
Dnal1	-1.162	3.554	-9.787	8.963e-06	9.529e-05
Cdk4	1.041	6.561	10.18	6.676e-06	7.861e-05
Sbspon	-7.682	0.2402	-10.81	4.218e-06	6.066e-05
Mdfi	4.703	1.862	9.934	8.006e-06	8.824e-05
Rasa3	1.652	5.828	10.09	7.103e-06	8.175e-05
Dennd1c	4.81	0.7322	10.81	4.217e-06	6.066e-05
Wdr12	1.556	4.398	9.852	8.524e-06	9.229e-05
Tro	4.155	1.403	10.02	7.492e-06	8.455e-05
Pgm5	-1.094	7.679	-10.13	6.918e-06	8.033e-05
Errfi1	-2.015	5.938	-10.1	7.036e-06	8.123e-05
Trp53	1.206	6.061	10.13	6.923e-06	8.033e-05
Prickle1	-2.318	5.545	-10.06	7.302e-06	8.317e-05
Wdr63	-5.761	-1.196	-11.01	3.662e-06	5.564e-05
Prr32	-7.998	-1.6	-10.87	4.032e-06	5.942e-05
Ndufa4l2	-2.704	4.558	-9.881	8.335e-06	9.068e-05
1500009L16Rik	-2.364	2.094	-9.545	1.082e-05	0.0001075
Fbxl19	1.23	3.858	9.751	9.217e-06	9.686e-05
Ift43	-1.836	3.327	-9.688	9.678e-06	9.97e-05
Ces5a	-6.057	-0.9459	-10.92	3.904e-06	5.817e-05
Col4a5	-3.325	3.708	-9.682	9.721e-06	9.999e-05
Fkbp5	3.724	4.532	9.66	9.891e-06	0.000101
Trim16	1.904	5.615	10.01	7.565e-06	8.504e-05
Lhfpl4	2.84	1.805	9.62	1.02e-05	0.0001034
P2ry13	2.964	6.345	10.01	7.572e-06	8.504e-05
Ntf3	-6.393	-1.2	-10.89	3.975e-06	5.884e-05
Rplp2	1.281	8.752	10.04	7.401e-06	8.381e-05
Nt5dc2	2.091	4.423	9.765	9.112e-06	9.634e-05
Ankrd13b	2.083	3.454	9.589	1.045e-05	0.0001052
Sgms2	-1.895	5.592	-10.03	7.44e-06	8.413e-05
Sox5	-2.439	2.7	-9.54	1.087e-05	0.0001077
Adgrg5	6.468	1.68	10.61	4.872e-06	6.64e-05
Gucy1b3	-3.525	5.768	-9.944	7.947e-06	8.786e-05
Asb11	-6.742	-2.15	-10.99	3.713e-06	5.61e-05
Ly86	5.901	6.024	9.638	1.006e-05	0.0001025
Arl4c	3.521	5.536	9.799	8.878e-06	9.464e-05
Dctd	3.964	1.706	9.735	9.329e-06	9.766e-05
Car12	-6.73	2.142	-9.619	1.021e-05	0.0001034
Ift81	-1.622	3.913	-9.731	9.357e-06	9.777e-05
Hspb6	-1.516	3.054	-9.574	1.058e-05	0.0001058
Apba2	5.307	2.723	9.619	1.021e-05	0.0001034
Cmbl	-2.547	1.408	-9.487	1.133e-05	0.0001106
Zadh2	-1.186	6.249	-10.05	7.322e-06	8.319e-05
Ncln	1.621	6.521	10.04	7.38e-06	8.371e-05
Pde3b	3.81	5.117	9.676	9.767e-06	0.0001002
Spats2l	-1.807	2.863	-9.534	1.092e-05	0.0001078
Pm20d2	-6.083	-0.7538	-10.74	4.425e-06	6.263e-05
Kif1c	-1.105	8.795	-9.958	7.86e-06	8.74e-05
Gm6548	1.037	4.053	9.713	9.49e-06	9.836e-05
Dlg5	-1.095	4.225	-9.789	8.95e-06	9.523e-05
Abhd17c	1.418	5.178	9.893	8.259e-06	9e-05
Trem2	5.271	5.221	9.542	1.085e-05	0.0001077
Ngrn	-1.039	4.705	-9.874	8.379e-06	9.102e-05
Akr1c14	-1.954	5.277	-9.917	8.111e-06	8.884e-05
Serpinf1	-1.939	3.108	-9.537	1.089e-05	0.0001077
Rps16	1.146	7.829	10.01	7.573e-06	8.504e-05
Lmtk3	4.364	0.688	10.4	5.634e-06	7.168e-05
Nat14	-1.97	2.43	-9.446	1.17e-05	0.000113
Mn1	-2.908	2.41	-9.425	1.19e-05	0.0001143
Slc16a8	-7.643	-1.751	-10.68	4.633e-06	6.439e-05
Ccnd1	1.449	8.867	9.934	8.007e-06	8.824e-05
Ptgir	-2.557	2.052	-9.403	1.211e-05	0.0001157
Ucp2	1.654	9.357	9.9	8.218e-06	8.976e-05
Sema3b	-3.812	1.065	-9.54	1.087e-05	0.0001077
Stk39	-1.364	5.623	-9.955	7.88e-06	8.75e-05
Ncaph	1.345	4.762	9.785	8.976e-06	9.529e-05
Lppr4	-5.479	2.088	-9.448	1.169e-05	0.000113
Cuedc1	-1.858	5.488	-9.919	8.099e-06	8.884e-05
Odc1	1.981	6.181	9.936	7.991e-06	8.821e-05
Ddx21	1.114	7.011	9.999	7.618e-06	8.53e-05
Itga8	-3.355	4.845	-9.73	9.365e-06	9.777e-05
Tsc22d4	1.21	5.906	9.946	7.935e-06	8.78e-05
Mcm2	1.389	5.151	9.823	8.719e-06	9.353e-05
Milr1	6.105	2.023	9.989	7.679e-06	8.581e-05
Clmn	-3.363	3.063	-9.421	1.194e-05	0.0001144
Slc29a4	-1.71	4.39	-9.728	9.379e-06	9.777e-05
Maff	2.822	4.76	9.622	1.019e-05	0.0001034
Dpp6	4.895	2.128	9.615	1.024e-05	0.0001036
Adamts14	-3.351	2.103	-9.359	1.255e-05	0.0001181
Zrsr1	-1.542	4.926	-9.822	8.721e-06	9.353e-05
Gatm	2.92	8.953	9.878	8.359e-06	9.086e-05
Nbeal1	-1.084	4.249	-9.708	9.529e-06	9.854e-05
Zbtb7c	-3.753	1.179	-9.446	1.171e-05	0.000113
Mark1	-2.961	4.403	-9.646	1e-05	0.0001019
Pgls	1.041	5.361	9.848	8.551e-06	9.244e-05
Lmnb1	2.331	4.775	9.653	9.939e-06	0.0001015
Pno1	1.051	4.844	9.749	9.226e-06	9.688e-05
St6galnac6	-1.496	4.731	-9.762	9.138e-06	9.634e-05
Nlrc3	3.932	2.122	9.437	1.179e-05	0.0001135
Slc20a2	-1.775	5.387	-9.839	8.61e-06	9.286e-05
Gm11627	-6.029	-2.062	-10.76	4.35e-06	6.183e-05
Fmnl1	4.421	4.745	9.426	1.189e-05	0.0001143
Trim47	-1.426	6.55	-9.917	8.109e-06	8.884e-05
Nid2	2.536	7.488	9.897	8.234e-06	8.979e-05
Rmnd5a	-1.247	6.682	-9.919	8.101e-06	8.884e-05
Fam26e	-4.617	0.7484	-9.585	1.048e-05	0.0001053
Tigd4	-6.496	-2.242	-10.69	4.581e-06	6.39e-05
Il6st	-1.529	9.182	-9.777	9.028e-06	9.562e-05
Limd2	1.37	5.779	9.828	8.681e-06	9.347e-05
Rps5	1.104	9.584	9.761	9.146e-06	9.634e-05
Olig2	3.713	3.889	9.313	1.302e-05	0.0001214
Hykk	-1.618	2.587	-9.318	1.296e-05	0.000121
Aldh6a1	-1.28	5.598	-9.826	8.697e-06	9.353e-05
Ext1	1.842	5.89	9.797	8.895e-06	9.472e-05
Myo1f	5.545	4.524	9.276	1.341e-05	0.0001239
Pitpnm3	-4.597	1.585	-9.325	1.289e-05	0.0001206
Rpl18	1.046	8.444	9.815	8.766e-06	9.387e-05
Gja1	1.561	5.576	9.764	9.124e-06	9.634e-05
Smpdl3a	-1.508	6.723	-9.852	8.524e-06	9.229e-05
Exd2	-1.042	4.029	-9.563	1.067e-05	0.0001065
Pam	-1.672	7.977	-9.8	8.871e-06	9.464e-05
Slc22a2	-8.075	-1.58	-10.34	5.896e-06	7.39e-05
Fgl2	1.772	5.986	9.785	8.975e-06	9.529e-05
Cspg4	-2.405	7.221	-9.805	8.837e-06	9.447e-05
Epsti1	5.36	3.528	9.248	1.372e-05	0.0001256
Adgrb2	3.029	2.888	9.233	1.388e-05	0.0001265
Scamp5	2.047	4.871	9.591	1.043e-05	0.0001051
Vipr2	-4.323	0.1773	-9.721	9.432e-06	9.791e-05
Kl	-10.56	1.325	-10.22	6.464e-06	7.759e-05
Zic4	-3.632	1.403	-9.268	1.35e-05	0.0001243
Eid2b	-1.285	3.162	-9.369	1.244e-05	0.0001174
1500012F01Rik	1.811	4.013	9.434	1.182e-05	0.0001137
Nomo1	1.057	8.992	9.744	9.264e-06	9.72e-05
Stxbp6	-1.896	4.465	-9.598	1.038e-05	0.0001048
Pmepa1	1.625	7.303	9.821	8.729e-06	9.354e-05
Ar	-4.138	1.378	-9.283	1.333e-05	0.0001237
Slc13a4	-6.228	0.7771	-9.713	9.486e-06	9.836e-05
Myocd	-6.368	-0.2366	-10.26	6.257e-06	7.645e-05
Slc4a5	-9.187	-0.2332	-10.19	6.592e-06	7.804e-05
Six5	-1.986	2.691	-9.262	1.356e-05	0.0001245
Ppip5k1	-1.121	4.829	-9.661	9.884e-06	0.000101
Gm4980	2.676	3.413	9.246	1.375e-05	0.0001257
H2-Aa	7.332	7.004	9.372	1.242e-05	0.0001173
Dact1	-2.46	2.977	-9.276	1.341e-05	0.0001239
6330408A02Rik	-1.252	3.365	-9.374	1.24e-05	0.0001172
Map4k3	-1.271	5.708	-9.761	9.14e-06	9.634e-05
Wnt5b	-2.268	4.893	-9.62	1.02e-05	0.0001034
Man2b1	2.657	7.977	9.755	9.182e-06	9.664e-05
Shmt1	4.045	2.008	9.298	1.317e-05	0.0001225
Vav2	2.201	4.436	9.431	1.185e-05	0.0001139
Thoc6	1.148	3.827	9.387	1.226e-05	0.0001161
Adra2c	-6.989	-0.8602	-10.21	6.522e-06	7.8e-05
Zfp185	-5.36	0.3058	-9.723	9.413e-06	9.791e-05
Pprc1	1.31	4.529	9.51	1.113e-05	0.0001092
Gm4951	3.69	4.596	9.306	1.31e-05	0.000122
Csrp2	1.075	7.443	9.764	9.124e-06	9.634e-05
Ntn1	-2.998	5.77	-9.649	9.971e-06	0.0001017
Igip	-1.941	2.223	-9.151	1.485e-05	0.0001324
Ms4a6b	4.798	3.025	9.159	1.475e-05	0.0001319
Sall1	3.463	4.839	9.356	1.258e-05	0.0001183
Ntpcr	2.967	5.044	9.439	1.177e-05	0.0001134
Pilra	7.021	2.494	9.677	9.757e-06	0.0001002
Prokr1	6.724	-1.333	11.16	3.308e-06	5.21e-05
Efhc2	-2.664	1.241	-9.148	1.489e-05	0.0001326
Prr5	4.028	3.76	9.135	1.504e-05	0.0001331
Nog	-6.028	-0.8703	-10.18	6.642e-06	7.828e-05
Rplp1	1.147	9.786	9.591	1.043e-05	0.0001051
Mlkl	2.048	4.498	9.399	1.215e-05	0.0001157
Sox4	3.285	6.468	9.6	1.036e-05	0.0001047
Ssbp2	-1.693	4.077	-9.417	1.198e-05	0.0001145
Ccnb1	5.852	1.691	9.726	9.39e-06	9.777e-05
Nenf	-1.301	4.944	-9.576	1.056e-05	0.0001058
Mast4	-1.568	5.924	-9.674	9.781e-06	0.0001003
Enc1	1.348	6.491	9.691	9.651e-06	9.95e-05
Tcirg1	1.327	6.062	9.662	9.876e-06	0.000101
Cd37	4.922	4.154	9.089	1.562e-05	0.0001364
Plscr1	-2.1	4.151	-9.392	1.222e-05	0.0001161
Itga5	1.61	7.675	9.677	9.758e-06	0.0001002
P2ry1	-2.445	3.571	-9.262	1.357e-05	0.0001245
Stil	6.817	-0.2158	10.86	4.076e-06	5.966e-05
Irs4	6.56	-1.396	11.06	3.528e-06	5.448e-05
Stac	-4.326	0.02422	-9.57	1.061e-05	0.0001061
Hcn2	-1.43	5.591	-9.623	1.018e-05	0.0001034
Sparc	1.441	12.37	9.399	1.215e-05	0.0001157
Anxa11	-1.153	6.056	-9.664	9.855e-06	0.0001009
Gm5089	-5.511	-1.701	-10.28	6.171e-06	7.575e-05
Rasgrp2	-3.378	3.808	-9.241	1.38e-05	0.000126
Ttll5	-1.067	4.441	-9.459	1.159e-05	0.0001124
Il17re	-5.53	-2.275	-10.44	5.508e-06	7.081e-05
Arsb	2.644	7.641	9.637	1.007e-05	0.0001025
Lxn	2.557	5.4	9.467	1.151e-05	0.0001119
Ddx25	4.106	0.4976	9.884	8.315e-06	9.053e-05
Cdk1	5.289	3.104	9.081	1.572e-05	0.000137
Celsr1	-2.636	0.7987	-9.132	1.507e-05	0.0001332
Ppara	-2.522	2.008	-9.034	1.634e-05	0.0001411
Tmem205	-1.113	4.226	-9.389	1.225e-05	0.0001161
Areg	7.013	-1.144	10.87	4.039e-06	5.947e-05
Ms4a4c	7.006	0.3959	10.69	4.593e-06	6.4e-05
Hfe2	-6.642	-1.395	-10.04	7.4e-06	8.381e-05
Gucy2g	-4.105	0.8984	-9.155	1.479e-05	0.0001321
Uba52	1.202	8.31	9.585	1.049e-05	0.0001053
Tmem87b	-1.057	5.001	-9.512	1.111e-05	0.0001091
Atp2b2	-7.245	-0.2495	-9.916	8.114e-06	8.884e-05
Zswim4	1.075	4.387	9.354	1.26e-05	0.0001183
Syt6	5.703	1.164	9.925	8.063e-06	8.872e-05
2410006H16Rik	1.943	4.172	9.24	1.381e-05	0.000126
2310022B05Rik	-1.845	7.187	-9.593	1.042e-05	0.0001051
Sap18	-1.246	4.54	-9.417	1.197e-05	0.0001145
Glrx	1.778	5.469	9.484	1.136e-05	0.0001108
Mettl24	-5.408	-1.747	-10.19	6.607e-06	7.806e-05
Dnajc2	1.249	5.927	9.567	1.063e-05	0.0001062
Yap1	-1.439	6.918	-9.587	1.047e-05	0.0001052
Pifo	-6.12	-1.833	-10.09	7.109e-06	8.175e-05
Memo1	1.349	4.892	9.402	1.212e-05	0.0001157
Angpt1	-4.219	3.934	-9.129	1.512e-05	0.0001334
Cd84	6.35	4.29	8.963	1.733e-05	0.0001473
Ftsj3	1.257	5.902	9.542	1.085e-05	0.0001077
Acot7	1.618	4.347	9.269	1.349e-05	0.0001243
Kif13b	-1.024	5.186	-9.488	1.132e-05	0.0001105
Itga10	-2.451	2.295	-8.97	1.724e-05	0.0001467
Peak1	-1.161	6.753	-9.574	1.058e-05	0.0001058
Dynlrb2	-5.853	-2.525	-10.28	6.192e-06	7.593e-05
Rpl18a	1.267	9.182	9.476	1.143e-05	0.0001113
Tbx3	-2.212	5.273	-9.449	1.167e-05	0.0001129
Prrg1	-1.858	3.884	-9.229	1.393e-05	0.0001268
Rinl	2.579	4.174	9.14	1.498e-05	0.0001329
Spi1	5.544	4.365	8.949	1.754e-05	0.0001482
Dydc2	-5.757	-2.165	-10.16	6.736e-06	7.911e-05
Tyrobp	5.538	5.315	9.051	1.612e-05	0.0001396
Sh3bgrl	-1.078	8.57	-9.48	1.139e-05	0.0001111
Colgalt1	1.039	7.302	9.551	1.077e-05	0.0001074
Crhr2	-7.49	-0.2585	-9.782	8.993e-06	9.532e-05
Tet1	-1.76	2.29	-8.949	1.753e-05	0.0001482
Lrp6	-1.216	7.081	-9.539	1.087e-05	0.0001077
Tbc1d32	-1.152	3.748	-9.196	1.431e-05	0.0001292
Pcdh18	-3.086	4.678	-9.285	1.332e-05	0.0001236
Cyth3	-2.068	6.541	-9.509	1.113e-05	0.0001092
Dcbld1	3.122	4.391	9.1	1.548e-05	0.0001358
Fam134b	1.557	5.677	9.451	1.165e-05	0.0001128
Csf3r	4.875	4.548	8.971	1.721e-05	0.0001466
6330416G13Rik	2.839	4.15	9.074	1.582e-05	0.0001377
Hcfc1r1	-1.157	5.369	-9.457	1.16e-05	0.0001124
Dpf1	4.225	1.245	9.267	1.351e-05	0.0001243
Hpgds	4.197	4.094	8.951	1.75e-05	0.0001482
Spice1	-1.445	3.275	-9.074	1.581e-05	0.0001377
Igtp	2.074	7.292	9.505	1.117e-05	0.0001094
Pard3b	-2.152	3.862	-9.162	1.471e-05	0.0001317
Bcr	1.073	7.09	9.521	1.103e-05	0.0001086
Nexn	-4.075	3.614	-9.008	1.669e-05	0.0001433
Dstn	-1.239	9.026	-9.4	1.214e-05	0.0001157
Ccdc146	-5.725	-2.184	-10.07	7.201e-06	8.231e-05
Sp7	-5.623	-2.237	-10.1	7.047e-06	8.129e-05
Rnf150	-2.221	2.762	-8.946	1.758e-05	0.0001484
Kitl	-1.128	8.027	-9.445	1.172e-05	0.000113
Tbxa2r	-2.184	4.1	-9.181	1.448e-05	0.0001306
Pcmtd2	-1.006	5.181	-9.4	1.214e-05	0.0001157
Psrc1	4.375	0.6961	9.55	1.078e-05	0.0001074
Hivep3	3.648	2.806	8.845	1.912e-05	0.0001573
Rcor2	3.07	0.9122	9.126	1.515e-05	0.0001335
Wnt2b	-3.161	0.1202	-9.135	1.504e-05	0.0001331
Oasl2	1.787	6.958	9.465	1.152e-05	0.0001119
Sh3rf1	-1.29	4.187	-9.208	1.417e-05	0.0001286
5730455P16Rik	-1.006	4.47	-9.268	1.35e-05	0.0001243
Fam208a	-1.211	4.418	-9.246	1.374e-05	0.0001257
Lurap1	-2.167	1.831	-8.829	1.938e-05	0.0001586
Chfr	1.126	4.696	9.242	1.378e-05	0.000126
Tanc2	1.268	5.72	9.389	1.225e-05	0.0001161
Rps15a	1.144	8.499	9.392	1.222e-05	0.0001161
Eml6	-1.911	2.727	-8.901	1.826e-05	0.0001525
Rai2	-3.157	1.045	-8.865	1.88e-05	0.0001551
Cspg5	2.826	4.005	8.96	1.738e-05	0.0001476
Sash3	4.66	3.566	8.808	1.973e-05	0.0001606
Prrt4	-4.495	2.751	-8.821	1.952e-05	0.0001594
Hnrnph3	-1.527	5.061	-9.32	1.294e-05	0.0001209
B430306N03Rik	8.241	0.602	10.26	6.291e-06	7.666e-05
Plcl2	3.508	3.771	8.87	1.873e-05	0.0001548
Rps19	1.253	7.744	9.418	1.197e-05	0.0001145
Arhgef17	-2.798	5.938	-9.339	1.275e-05	0.0001194
Drc7	-7.605	0.02527	-9.577	1.056e-05	0.0001058
Sh3bp1	3.408	3.388	8.818	1.956e-05	0.0001597
H2afx	1.709	4.635	9.158	1.476e-05	0.0001319
Scrn3	-1.452	3.968	-9.11	1.535e-05	0.0001349
Cks1b	3.262	2.742	8.78	2.021e-05	0.0001634
P4htm	-2.322	2.139	-8.794	1.996e-05	0.000162
Tnfrsf12a	2.183	4.443	9.072	1.584e-05	0.0001378
Steap1	-6.905	-0.8851	-9.617	1.023e-05	0.0001035
Vmac	-1.122	4.906	-9.281	1.336e-05	0.0001239
Sh2b2	2.607	3.541	8.872	1.871e-05	0.0001547
Lacc1	4.442	3.35	8.768	2.042e-05	0.0001645
Folr1	-10.07	0.2016	-9.514	1.109e-05	0.0001091
Tma7	1.266	3.976	9.033	1.636e-05	0.0001411
Cdca8	4.44	2.493	8.799	1.987e-05	0.0001614
Actg2	-6.079	0.8982	-9.05	1.612e-05	0.0001396
Slc4a2	-1.125	6.537	-9.387	1.226e-05	0.0001161
Pak3	4.463	3.209	8.735	2.099e-05	0.0001675
Bax	1.098	5.34	9.269	1.349e-05	0.0001243
Tspan14	1.017	7.396	9.373	1.241e-05	0.0001173
Id1	-1.408	7.077	-9.359	1.255e-05	0.0001181
Lrch1	-1.007	5.912	-9.347	1.266e-05	0.0001187
Atf2	-1.004	5.481	-9.304	1.311e-05	0.000122
Ckap2	5.671	1.825	9.101	1.547e-05	0.0001358
Uchl3	1.377	3.946	8.975	1.716e-05	0.0001465
Neurl3	5.01	3.361	8.712	2.14e-05	0.0001699
Rgs6	-2.047	3.261	-8.882	1.855e-05	0.0001538
Slc25a25	1.048	4.727	9.134	1.505e-05	0.0001331
H2-Eb1	8.759	5.362	8.697	2.168e-05	0.000171
Pip5k1b	-1.833	4.095	-9.03	1.64e-05	0.0001414
Adamtsl4	-1.762	3.38	-8.891	1.84e-05	0.000153
Rps13	1.045	8.25	9.278	1.339e-05	0.0001239
Ngb	-5.775	-0.536	-9.49	1.13e-05	0.0001105
Trim68	-1.575	2.924	-8.795	1.994e-05	0.0001619
Rpl39	1.446	8.191	9.266	1.352e-05	0.0001243
Hmha1	3.532	4.589	8.861	1.888e-05	0.0001555
Gsap	2.168	3.682	8.814	1.963e-05	0.00016
Dhx58	2.072	4.629	9.003	1.677e-05	0.0001439
Smoc1	3.011	2.618	8.651	2.255e-05	0.0001758
Ccdc88c	-2.215	3.226	-8.814	1.963e-05	0.00016
Etl4	-1.405	4.522	-9.09	1.561e-05	0.0001364
Ston1	-2.399	4.002	-8.949	1.753e-05	0.0001482
Tekt1	-4.53	-0.2644	-9.211	1.413e-05	0.0001284
H2-Ob	4.509	2.045	8.755	2.063e-05	0.0001652
Fam69a	-1.513	5.303	-9.196	1.431e-05	0.0001292
Pias3	-1.025	4.975	-9.164	1.469e-05	0.0001317
Kcnma1	-2.295	2.333	-8.67	2.219e-05	0.0001737
Rap1gap	2.774	1.939	8.647	2.262e-05	0.000176
Fam181b	-2.066	3.929	-8.937	1.771e-05	0.0001491
Ccdc136	-2.242	1.646	-8.629	2.297e-05	0.0001777
Ryr2	-4.151	1.633	-8.635	2.285e-05	0.0001772
Asb1	-1.126	4.094	-8.99	1.694e-05	0.000145
Mannr	-4.462	-0.2301	-9.145	1.492e-05	0.0001326
Ttc21a	-4.695	-1.043	-9.53	1.095e-05	0.000108
Olfml1	-3.118	1.584	-8.61	2.336e-05	0.0001793
Kcnj15	3.543	2.693	8.606	2.343e-05	0.0001797
Rbms3	-1.496	3.666	-8.882	1.854e-05	0.0001538
Arhgef10	-1.23	5.736	-9.214	1.41e-05	0.0001282
Tmprss11a	-6.143	-1.82	-9.496	1.125e-05	0.00011
Slc2a9	2.54	3.587	8.717	2.131e-05	0.0001695
Kcnh1	-3.058	0.374	-8.76	2.055e-05	0.0001652
Nop16	1.313	4.469	8.975	1.716e-05	0.0001465
Rpl19	1.058	8.999	9.154	1.481e-05	0.0001322
Ccdc67	-3.886	-0.3599	-9.097	1.551e-05	0.0001358
Slc25a24	-1.508	5.423	-9.162	1.471e-05	0.0001317
Was	4.925	3.009	8.6	2.356e-05	0.00018
Rpl36al	1.21	5.188	9.096	1.553e-05	0.0001359
Casz1	-2.451	1.284	-8.588	2.381e-05	0.0001813
Adora1	2.741	3.84	8.72	2.126e-05	0.0001693
Btk	5.115	2.924	8.604	2.347e-05	0.0001797
Slc50a1	-1.103	5.804	-9.196	1.431e-05	0.0001292
Cldn2	-9.108	-0.5483	-9.253	1.366e-05	0.0001251
Socs1	2.827	2.267	8.566	2.426e-05	0.000183
Cnr2	3.921	2.475	8.578	2.401e-05	0.0001822
Ivns1abp	1.846	7.086	9.201	1.425e-05	0.0001292
Nacc2	-1.235	5.777	-9.179	1.451e-05	0.0001307
Cdon	-2.39	2.543	-8.618	2.32e-05	0.0001786
Mllt6	-1.681	6.205	-9.183	1.447e-05	0.0001305
Tek	-2.456	8.825	-9.09	1.56e-05	0.0001364
Fam217a	-2.603	2.101	-8.565	2.429e-05	0.0001831
Nlrc5	2.724	4.216	8.76	2.055e-05	0.0001652
Chadl	3.116	1.978	8.566	2.425e-05	0.000183
Myl6	-1.01	8.933	-9.088	1.564e-05	0.0001364
Mapk4	-3.14	1.875	-8.537	2.487e-05	0.0001849
Col28a1	-4.6	0.7153	-8.695	2.171e-05	0.0001711
Pyurf	-1.036	4.161	-8.915	1.804e-05	0.0001513
Clock	-1.013	6.252	-9.173	1.458e-05	0.0001312
Heg1	-1.073	7.639	-9.146	1.491e-05	0.0001326
Bcat1	5.483	2.641	8.609	2.338e-05	0.0001794
Nfe2l2	1.049	7.307	9.172	1.459e-05	0.0001312
Golm1	1.211	7.931	9.145	1.492e-05	0.0001326
Amz1	2.63	3.968	8.699	2.164e-05	0.0001707
Stim1	-1.074	6.307	-9.164	1.469e-05	0.0001317
Igbp1	1.171	6.23	9.143	1.494e-05	0.0001326
Soat1	2.508	5.19	8.926	1.787e-05	0.0001502
Nfatc2	2.82	2.47	8.502	2.563e-05	0.0001883
Calml4	-4.603	1.916	-8.504	2.559e-05	0.0001881
Tnfrsf1b	1.38	6.582	9.146	1.49e-05	0.0001326
Siglec1	7.549	3.134	8.74	2.09e-05	0.000167
Vstm4	-2.265	4.11	-8.835	1.928e-05	0.0001581
Cerk	1.866	5.824	9.057	1.603e-05	0.0001392
Tnfrsf19	-2.182	7.284	-9.104	1.542e-05	0.0001355
Clip2	1.073	6.297	9.131	1.509e-05	0.0001333
Slc29a1	1.262	6.35	9.127	1.514e-05	0.0001335
Wdr13	-1.062	5.702	-9.097	1.552e-05	0.0001358
Ankrd33b	-1.388	4.334	-8.892	1.839e-05	0.000153
Ggact	-1.647	4.688	-8.948	1.755e-05	0.0001482
Bbs2	-1.892	3.01	-8.621	2.313e-05	0.0001785
Slc19a1	-2.486	5.442	-9.01	1.667e-05	0.0001432
Dsel	-1.149	4.465	-8.917	1.801e-05	0.0001512
Nubp1	1.48	4.353	8.821	1.952e-05	0.0001594
P2ry6	4.752	4.477	8.556	2.448e-05	0.0001833
Auts2	-1.261	4.039	-8.832	1.934e-05	0.0001584
Klrk1	6.773	0.02764	9.695	9.621e-06	9.941e-05
Ldha	1.123	9.297	9.011	1.666e-05	0.0001432
Traf3ip3	3.861	1.891	8.526	2.51e-05	0.0001858
Dmtn	-1.821	3.139	-8.632	2.291e-05	0.0001776
Etv4	6.637	1.279	9.365	1.248e-05	0.0001176
Nasp	1.237	5.312	8.994	1.689e-05	0.0001446
Plin4	-7.165	1.02	-8.778	2.023e-05	0.0001635
Ackr2	5.875	4.003	8.451	2.68e-05	0.0001944
Negr1	2.306	2.349	8.455	2.672e-05	0.0001939
Fcgrt	-1.303	7.964	-9.057	1.604e-05	0.0001392
Sos2	-1.006	6.094	-9.098	1.55e-05	0.0001358
Stxbp3	-1.127	4.916	-8.971	1.722e-05	0.0001466
Cd83	3.306	6.433	8.973	1.719e-05	0.0001465
Slc4a10	-6.723	1.716	-8.535	2.491e-05	0.0001849
Six3	-5.278	-1.98	-9.353	1.26e-05	0.0001183
Gpm6a	-1.871	5.212	-8.974	1.717e-05	0.0001465
Pls1	-3.828	0.5845	-8.554	2.45e-05	0.0001833
Pnck	-2.284	1.627	-8.422	2.75e-05	0.0001972
Slc38a11	-6.502	1.307	-8.583	2.391e-05	0.0001819
Psd3	-1.609	4.33	-8.836	1.928e-05	0.0001581
Hvcn1	6.183	4.045	8.42	2.754e-05	0.0001973
Cdh11	2.071	5.194	8.886	1.848e-05	0.0001534
Npc2	1.949	8.675	9.011	1.666e-05	0.0001432
Kansl1l	-1.219	3.671	-8.713	2.139e-05	0.0001699
Rab32	3.771	4.388	8.576	2.405e-05	0.0001823
Ano1	-3.048	5.624	-8.944	1.76e-05	0.0001485
Ctnnal1	-1.772	3.394	-8.638	2.28e-05	0.000177
Sdc2	-3.347	6.337	-8.974	1.717e-05	0.0001465
Tsr2	-1.042	4.628	-8.889	1.843e-05	0.0001531
Stoml1	-1.164	3.647	-8.682	2.195e-05	0.0001723
Layn	-1.623	6.312	-9.027	1.643e-05	0.0001416
Tsr1	1.017	5.008	8.893	1.837e-05	0.000153
Slamf8	6.352	2.265	8.661	2.236e-05	0.0001747
Syngr1	4.236	4.153	8.469	2.638e-05	0.0001923
Baiap2l1	-3.561	2.945	-8.463	2.651e-05	0.0001929
Nbl1	-2.834	5.55	-8.916	1.802e-05	0.0001512
Gdpd5	1.482	6.4	9.019	1.655e-05	0.0001424
Dpp7	1.44	4.931	8.844	1.915e-05	0.0001574
Gpsm3	2.367	4.571	8.701	2.16e-05	0.0001706
Ppif	1.65	2.779	8.436	2.716e-05	0.0001957
Pyhin1	7.794	-0.1577	9.512	1.111e-05	0.0001091
Irg1	8.815	0.3926	9.476	1.143e-05	0.0001113
Tbx15	-2.776	3.245	-8.525	2.512e-05	0.0001858
Pvrl4	4.533	1.864	8.485	2.602e-05	0.0001905
Gas2l3	2.847	3.376	8.441	2.703e-05	0.0001954
Irs3	-4.858	-2.558	-9.453	1.164e-05	0.0001128
Hcar1	-2.747	2.64	-8.427	2.737e-05	0.0001964
5031414D18Rik	2.586	1.643	8.372	2.872e-05	0.0002028
Slc19a3	-1.247	6.259	-8.998	1.684e-05	0.0001444
Slc22a6	-5.411	-2.334	-9.279	1.338e-05	0.0001239
Hip1r	-1.792	6.231	-8.973	1.719e-05	0.0001465
Cd52	7.416	3.672	8.414	2.767e-05	0.0001977
Samsn1	4.322	3.858	8.38	2.851e-05	0.0002018
Ttbk1	3.378	1.283	8.46	2.66e-05	0.0001933
Pyroxd1	-1.231	3.405	-8.577	2.402e-05	0.0001822
Nrbp2	-2.576	3.149	-8.483	2.605e-05	0.0001906
Pthlh	-3.122	0.5987	-8.405	2.79e-05	0.0001985
Pou3f1	4.923	2.517	8.369	2.881e-05	0.000203
Stab1	1.392	8.785	8.905	1.818e-05	0.0001521
Olfr78	-5.942	0.3814	-8.683	2.193e-05	0.0001723
Rundc3a	3.283	3.198	8.349	2.931e-05	0.0002059
Ms4a6c	5.938	3.938	8.309	3.037e-05	0.00021
Klhl21	-1.048	4.545	-8.782	2.016e-05	0.0001633
Hipk3	-1.065	7.671	-8.942	1.764e-05	0.0001486
Epm2a	-1.755	1.997	-8.333	2.972e-05	0.0002074
Pla2g6	2.044	4.882	8.719	2.127e-05	0.0001693
Klhl30	-4.651	0.6551	-8.447	2.69e-05	0.000195
AW549542	-4.617	0.1353	-8.592	2.371e-05	0.000181
Dbndd2	-1.406	5.265	-8.868	1.876e-05	0.0001549
Zfp395	-1.18	4.454	-8.749	2.074e-05	0.0001659
Ccdc23	1.207	4.785	8.757	2.06e-05	0.0001652
Cacng1	5.262	-2.152	9.852	8.522e-06	9.229e-05
Cep83os	-1.458	3.631	-8.58	2.397e-05	0.0001821
Rasl11a	-2.063	2.692	-8.393	2.819e-05	0.0001999
Dcbld2	-1.631	3.857	-8.616	2.323e-05	0.0001787
Il2rg	1.193	6.745	8.952	1.749e-05	0.0001482
Shcbp1	4.885	1.626	8.494	2.581e-05	0.0001892
Dna2	5.028	1.036	8.756	2.062e-05	0.0001652
Aspn	-3.285	6.018	-8.835	1.929e-05	0.0001581
Slc2a10	-3.603	2.052	-8.285	3.103e-05	0.0002135
Cnst	-1.237	4.894	-8.807	1.974e-05	0.0001606
Trpm3	-7.091	1.105	-8.548	2.464e-05	0.0001838
Plagl1	-3.446	2.06	-8.279	3.117e-05	0.000214
Tmem18	-1.114	4.526	-8.743	2.084e-05	0.0001667
Capza1	1.299	5.966	8.896	1.833e-05	0.0001529
Olig1	3.452	5.413	8.65	2.256e-05	0.0001758
Ikbke	3.374	1.159	8.415	2.766e-05	0.0001977
Prpf40b	-1.223	4.388	-8.71	2.145e-05	0.0001701
Tmem45a	-2.579	3.4	-8.468	2.641e-05	0.0001924
Pi15	-5.37	0.6531	-8.46	2.658e-05	0.0001933
Ctsd	2.387	11.24	8.712	2.141e-05	0.0001699
Rock1	-1.17	7.319	-8.905	1.819e-05	0.0001521
Slc7a6	1.467	3.904	8.53	2.503e-05	0.0001855
Wasf1	2.547	2.462	8.259	3.175e-05	0.0002171
Mki67	5.8	4.88	8.322	3.001e-05	0.0002087
Aunip	5.653	-1.945	9.666	9.843e-06	0.0001009
Cdk14	-1.786	4.819	-8.741	2.088e-05	0.0001669
Sp4	-1.31	4.426	-8.687	2.187e-05	0.000172
1700016K19Rik	-5.928	-2.089	-8.996	1.686e-05	0.0001444
Slc2a12	-1.713	4.233	-8.636	2.283e-05	0.0001772
Slc7a10	-6.361	-0.3227	-8.813	1.964e-05	0.00016
Pvt1	5.276	1.212	8.651	2.255e-05	0.0001758
Mettl7a1	-2.134	4.757	-8.701	2.16e-05	0.0001706
Pole	4.153	2.081	8.264	3.16e-05	0.0002162
Bola2	1.637	4.469	8.592	2.372e-05	0.000181
Epha4	-2.075	5.184	-8.756	2.061e-05	0.0001652
Rsph9	-3.736	1.234	-8.227	3.266e-05	0.0002215
Frmd3	-4.823	-0.03172	-8.56	2.438e-05	0.0001831
Rpl36a	1.027	7.57	8.865	1.881e-05	0.0001551
Htr2c	-8.938	0.1685	-8.733	2.103e-05	0.0001676
Lrrk2	-1.309	4.491	-8.668	2.222e-05	0.0001737
Ripply3	-2.037	2.905	-8.339	2.956e-05	0.000207
Osbpl3	-1.99	2.96	-8.347	2.936e-05	0.0002061
Shmt2	1.41	5.743	8.792	2e-05	0.0001622
Fam89a	2.895	0.4967	8.465	2.649e-05	0.0001928
Slc22a5	-1.303	4.713	-8.695	2.172e-05	0.0001711
Mcm5	2.394	5.021	8.612	2.331e-05	0.0001791
Tmem252	2.252	6.953	8.83	1.937e-05	0.0001586
Eif2s2	1.41	7.012	8.85	1.905e-05	0.0001568
Ajap1	-4.99	-0.5604	-8.767	2.043e-05	0.0001645
Sytl2	-1.507	4.147	-8.576	2.405e-05	0.0001823
Nlrp1b	5.811	1.59	8.546	2.467e-05	0.0001839
Ifi30	4.102	5.827	8.563	2.433e-05	0.0001831
Tmem37	1.218	4.256	8.539	2.484e-05	0.0001849
Fam19a2	6.232	0.2481	9.196	1.431e-05	0.0001292
Chn1	-1.466	3.872	-8.51	2.546e-05	0.0001877
Ptprz1	4.076	4.971	8.405	2.79e-05	0.0001985
Apaf1	1.176	4.276	8.538	2.485e-05	0.0001849
Actr3	1.098	8.402	8.78	2.02e-05	0.0001634
B930041F14Rik	-1.191	3.289	-8.398	2.808e-05	0.0001994
Cdh2	2.186	6.33	8.775	2.03e-05	0.0001638
BC051019	-5.974	-1.494	-8.807	1.974e-05	0.0001606
Mlxipl	5.069	1.968	8.288	3.092e-05	0.0002131
E2f2	3.481	2.782	8.153	3.488e-05	0.0002327
Ebf2	-4.947	-1.546	-8.869	1.874e-05	0.0001548
Flt1	-1.316	10.79	-8.602	2.352e-05	0.0001799
Sptbn1	-1.116	11.04	-8.589	2.377e-05	0.0001812
Sept5	-1.027	5.288	-8.736	2.098e-05	0.0001675
Dera	1.856	4.091	8.428	2.734e-05	0.0001964
Cpm	-2.11	4.062	-8.495	2.579e-05	0.0001892
Gm9899	-5.056	-0.219	-8.568	2.422e-05	0.000183
Fbxo3	-1.027	5.968	-8.782	2.016e-05	0.0001633
Plscr2	-2.644	4.846	-8.596	2.365e-05	0.0001806
Susd4	-2.505	2.568	-8.2	3.344e-05	0.0002256
Rdm1	-1.697	4.152	-8.512	2.541e-05	0.0001874
Dpysl3	-1.662	6.129	-8.758	2.058e-05	0.0001652
Capn3	5.336	4.23	8.149	3.502e-05	0.0002331
Bex1	4.046	1.446	8.244	3.215e-05	0.0002193
Gm3716	-2.183	3.46	-8.352	2.922e-05	0.0002055
Psmb8	1.52	7.726	8.765	2.045e-05	0.0001647
Trpc1	-3.648	1.384	-8.111	3.623e-05	0.0002392
Obscn	-5.937	-0.2375	-8.631	2.294e-05	0.0001777
Snx20	4.633	2.766	8.11	3.629e-05	0.0002395
Prkab2	-1.329	2.967	-8.281	3.112e-05	0.0002137
Ttc13	1.348	5.028	8.611	2.333e-05	0.0001792
Tlr12	3.425	3.413	8.156	3.481e-05	0.0002325
Bambi-ps1	-2.019	1.652	-8.099	3.664e-05	0.000241
Scube2	-2.81	1.452	-8.086	3.706e-05	0.0002422
Dll1	-2.863	2.113	-8.112	3.62e-05	0.0002391
Mpi	1.048	4.686	8.552	2.455e-05	0.0001833
Nuak2	3.639	2.769	8.085	3.71e-05	0.0002422
Fam105a	4.352	4.612	8.244	3.218e-05	0.0002194
Slc5a5	-4.934	1.628	-8.091	3.689e-05	0.0002416
Lims2	-2.521	6.436	-8.705	2.153e-05	0.0001703
Bid	2.567	2.702	8.107	3.638e-05	0.00024
Kif20b	2.886	2.688	8.095	3.677e-05	0.0002413
Rgs4	-4.269	7.406	-8.644	2.267e-05	0.0001763
Scube3	-5.488	0.09519	-8.437	2.713e-05	0.0001957
Cacna1s	3.622	0.7822	8.325	2.995e-05	0.0002086
Car5b	-1.981	2.722	-8.198	3.352e-05	0.0002257
9230112J17Rik	-6.614	-0.399	-8.59	2.377e-05	0.0001812
Vash1	2.391	6.757	8.704	2.156e-05	0.0001704
Bcl2a1d	5.805	0.5683	8.951	1.751e-05	0.0001482
Stambpl1	2.16	2.918	8.135	3.547e-05	0.0002355
Efnb1	-1.718	4.232	-8.472	2.631e-05	0.0001921
Peg3	-1.801	3.049	-8.242	3.224e-05	0.0002197
Agtpbp1	-1.016	5.236	-8.649	2.258e-05	0.0001759
Etnk2	-4.362	1.176	-8.084	3.712e-05	0.0002423
Slc22a3	-8.829	-0.1531	-8.533	2.496e-05	0.000185
Myo10	1.274	8.591	8.669	2.221e-05	0.0001737
Nell2	3.825	0.8542	8.31	3.034e-05	0.00021
Itga9	-1.665	5.671	-8.669	2.22e-05	0.0001737
Fhl3	1.79	4.504	8.431	2.727e-05	0.0001961
Stmn3	3.515	2.137	8.052	3.824e-05	0.000247
Rfx2	-2.142	1.787	-8.057	3.807e-05	0.0002466
Ctxn1	2.067	3.211	8.165	3.451e-05	0.0002308
Sp140	1.342	5.072	8.559	2.439e-05	0.0001831
Acbd4	-1.07	4.723	-8.559	2.44e-05	0.0001831
Fat4	-1.602	4.803	-8.558	2.442e-05	0.0001832
Slamf1	6.423	-1.49	9.137	1.502e-05	0.000133
Tm6sf2	-3.61	0.1868	-8.188	3.38e-05	0.000227
Stk32a	2.283	2.033	8.036	3.877e-05	0.0002495
Bmp2	-2.034	3.604	-8.313	3.027e-05	0.0002098
Ptpn7	5.632	1.164	8.494	2.581e-05	0.0001892
Matn4	3.272	2.206	8.03	3.898e-05	0.0002506
Chchd10	-2.81	3.353	-8.226	3.27e-05	0.0002217
Sdpr	-3.408	7.111	-8.63	2.296e-05	0.0001777
Cabp1	-4.396	0.7166	-8.113	3.617e-05	0.0002391
Klk8	1.493	4.056	8.345	2.942e-05	0.0002065
Kansl3	-1.048	6.149	-8.691	2.18e-05	0.0001715
Cfap52	-5.151	-0.9723	-8.604	2.347e-05	0.0001797
Fanca	5.17	0.1894	8.918	1.8e-05	0.0001512
Nav3	3.69	3.112	8.038	3.872e-05	0.0002494
Omd	-5.571	-0.7971	-8.556	2.447e-05	0.0001833
Lrrc14b	-3.594	-0.5956	-8.402	2.798e-05	0.000199
Klhdc7a	-5.724	0.3062	-8.282	3.11e-05	0.0002137
Mis18bp1	7.51	0.1905	8.892	1.838e-05	0.000153
Ins2	-6.102	-2.409	-8.679	2.202e-05	0.0001726
Ece2	1.093	3.919	8.312	3.027e-05	0.0002098
Zhx2	-1.193	3.788	-8.335	2.968e-05	0.0002073
Fam120aos	-1.337	3.412	-8.257	3.18e-05	0.0002173
Crb3	-5.056	-2.071	-8.717	2.132e-05	0.0001695
Sec61b	1.061	5.066	8.523	2.517e-05	0.0001861
Sema4d	3.095	4.118	8.177	3.416e-05	0.0002289
Foxc1	-1.522	6.416	-8.644	2.269e-05	0.0001763
Ppl	-2.851	2.075	-8.003	3.998e-05	0.000256
Snhg6	1.652	2.295	7.997	4.018e-05	0.0002563
Hebp1	1.243	6.65	8.647	2.263e-05	0.000176
Slc6a13	-5.236	0.02704	-8.284	3.105e-05	0.0002135
Clu	-3.35	7.001	-8.572	2.412e-05	0.0001826
H2-DMa	6.304	4.34	7.974	4.105e-05	0.0002595
Gm13889	-3.04	5.516	-8.51	2.547e-05	0.0001877
Cdc25c	6.236	-0.05566	8.881	1.856e-05	0.0001538
Pgam2	-5.349	-1.778	-8.605	2.345e-05	0.0001797
Ube2v2	-1.205	2.97	-8.148	3.504e-05	0.0002332
Slc25a13	2.173	2.6	7.997	4.019e-05	0.0002563
Rcor3	-1.471	3.841	-8.31	3.035e-05	0.00021
Aldh1b1	3.937	0.528	8.321	3.006e-05	0.0002088
Sostdc1	-7.815	1.652	-8.1	3.662e-05	0.0002409
Il12b	5.78	-1.83	9.088	1.563e-05	0.0001364
Camkk1	1.915	2.443	7.984	4.066e-05	0.0002577
Rpl36	1.136	7.358	8.628	2.3e-05	0.0001779
Lalba	7.463	-0.899	8.877	1.862e-05	0.0001542
Lrrc23	-5.16	-1.325	-8.536	2.489e-05	0.0001849
Brip1	3.724	1.188	8.076	3.739e-05	0.0002436
Gstk1	-1.541	4.064	-8.336	2.965e-05	0.0002072
Dgki	3.861	1.426	8.031	3.895e-05	0.0002505
Man2b2	1.225	7.157	8.619	2.317e-05	0.0001786
Sntb1	-5.031	1.645	-7.941	4.229e-05	0.0002653
Slc18b1	-1.881	2.669	-8.057	3.806e-05	0.0002466
Orai2	3.021	3.25	8.006	3.986e-05	0.0002555
BC147527	6.327	-1.002	8.897	1.832e-05	0.0001529
Tubb2a	1.501	5.528	8.508	2.551e-05	0.0001879
Itgb5	2.149	8.473	8.553	2.453e-05	0.0001833
Lsm4	1.164	4.757	8.408	2.783e-05	0.0001983
Pex5l	-2.383	3.39	-8.154	3.487e-05	0.0002327
Ints12	1.168	4.84	8.415	2.766e-05	0.0001977
Pcmtd1	-1.714	7.19	-8.575	2.408e-05	0.0001824
Mogs	1.315	5.064	8.438	2.71e-05	0.0001957
Tmem184a	-4.794	-2.191	-8.655	2.248e-05	0.0001755
Chml	-1.165	4.041	-8.309	3.037e-05	0.00021
I830077J02Rik	3.918	1.49	7.993	4.035e-05	0.0002565
Olfr558	-8.015	2.335	-7.945	4.213e-05	0.0002647
Ppp1r1b	-6.29	1.99	-7.915	4.331e-05	0.00027
Tmem237	-1.139	4.784	-8.435	2.717e-05	0.0001957
A830018L16Rik	-5.591	-2.235	-8.56	2.439e-05	0.0001831
Tnfaip3	3.447	6.011	8.395	2.814e-05	0.0001996
Vwa3a	-4.232	0.7006	-7.965	4.138e-05	0.0002609
Snx10	1.636	5.29	8.438	2.71e-05	0.0001957
A830080D01Rik	-1.327	3.375	-8.163	3.459e-05	0.0002312
Gria4	2.787	1.945	7.896	4.408e-05	0.000273
Cenph	3.704	0.313	8.293	3.08e-05	0.0002125
Txnrd1	1.159	6.084	8.552	2.455e-05	0.0001833
Pcdhgb6	-1.261	3.733	-8.232	3.251e-05	0.000221
Cthrc1	-1.45	3.533	-8.188	3.382e-05	0.000227
Usp53	-2.467	5.296	-8.445	2.693e-05	0.0001951
C1qtnf9	-3.013	2.769	-7.987	4.054e-05	0.0002572
Clspn	4.998	1.568	8.056	3.807e-05	0.0002466
A630001G21Rik	2.96	1.602	7.899	4.395e-05	0.0002725
Dclk2	2.066	3.446	8.047	3.838e-05	0.0002476
Tns3	1.044	6.996	8.566	2.425e-05	0.000183
Smap2	1.135	6.691	8.561	2.436e-05	0.0001831
Itgax	8.877	3.952	8.002	4.002e-05	0.000256
Nrp2	-1.056	7.453	-8.534	2.494e-05	0.000185
Akap13	1.12	6.7	8.554	2.45e-05	0.0001833
Iqgap3	6.41	2.136	8.082	3.721e-05	0.0002427
Hspa12a	-2.14	4.599	-8.336	2.965e-05	0.0002072
Crocc	-1.095	3.113	-8.085	3.71e-05	0.0002422
Kif22	4.464	2.522	7.867	4.53e-05	0.0002779
Mov10	1.419	5.085	8.386	2.838e-05	0.0002011
Gpr21	-5.936	0.6708	-8.044	3.849e-05	0.0002482
Mcm7	1.815	4.958	8.336	2.964e-05	0.0002072
1110017D15Rik	-4.004	-0.04644	-8.061	3.792e-05	0.0002461
Pqlc1	-1.298	5.346	-8.464	2.649e-05	0.0001928
Trdmt1	-1.477	3.279	-8.102	3.652e-05	0.0002406
Chac1	3.516	1.895	7.866	4.532e-05	0.0002779
Ntrk2	-3.179	4.166	-8.192	3.37e-05	0.0002267
Gcnt4	-3.386	0.5713	-7.907	4.364e-05	0.0002713
Myo5c	-5.359	-1.639	-8.424	2.745e-05	0.0001969
Endov	-1.139	4.209	-8.285	3.1e-05	0.0002134
Mlxip	1.85	3.464	8.038	3.872e-05	0.0002494
Txnrd3	-1.929	3.527	-8.127	3.572e-05	0.0002367
Mxra7	-1.025	5.255	-8.451	2.68e-05	0.0001944
Traf3ip2	-1.962	1.523	-7.848	4.61e-05	0.0002811
Pithd1	-1.085	4.535	-8.34	2.955e-05	0.000207
Dbn1	1.782	5.158	8.35	2.929e-05	0.0002059
Atp1a2	-3.342	8.241	-8.421	2.751e-05	0.0001972
Gm8615	1.791	3.153	7.97	4.118e-05	0.0002599
Noc4l	1.402	3.951	8.145	3.513e-05	0.0002336
Prr36	5.229	-0.3347	8.709	2.146e-05	0.0001701
Nfkbiz	4.091	5.431	8.168	3.442e-05	0.0002303
Rars	1.049	6.485	8.505	2.557e-05	0.000188
Atcay	5.652	1.486	8.103	3.651e-05	0.0002406
C1ql1	6.169	-0.5673	8.673	2.212e-05	0.0001734
Frem2	-2.584	4.235	-8.199	3.348e-05	0.0002257
Cep85l	-1.557	2.331	-7.898	4.401e-05	0.0002727
Xk	-1.067	2.961	-8.003	3.996e-05	0.000256
Rac2	6.216	4.652	7.843	4.629e-05	0.0002812
Mgp	-3.713	7.729	-8.4	2.803e-05	0.0001992
Asap3	1.269	5.056	8.336	2.965e-05	0.0002072
Cyp2e1	-5.768	-1.415	-8.3	3.06e-05	0.0002114
Sh3rf2	-5.367	-2.33	-8.445	2.695e-05	0.0001951
Incenp	2.233	4.59	8.175	3.422e-05	0.0002291
Hk2	5.549	3.952	7.808	4.781e-05	0.0002883
Foxj1	-3.92	1.083	-7.805	4.797e-05	0.0002888
Lox	-4.018	4.691	-8.162	3.462e-05	0.0002313
Lrrc59	1.025	7.437	8.471	2.633e-05	0.0001921
Med12l	2.057	2.73	7.852	4.59e-05	0.0002807
Aifm3	-3.758	1.53	-7.783	4.896e-05	0.0002924
Cfap44	-4.779	-1.497	-8.356	2.914e-05	0.000205
Crebrf	-1.245	5.718	-8.432	2.726e-05	0.0001961
Capsl	-5.708	-1.605	-8.295	3.074e-05	0.0002121
Slc43a2	1.757	6.141	8.419	2.756e-05	0.0001973
Slfn2	1.583	6.361	8.441	2.703e-05	0.0001954
Dync2li1	-1.284	2.697	-7.921	4.31e-05	0.0002689
Il1a	8.901	3.284	8.051	3.826e-05	0.000247
Nr3c2	-3.269	3.225	-7.937	4.245e-05	0.0002659
Me2	1.42	5.402	8.343	2.947e-05	0.0002067
Tlr9	4.865	2.669	7.765	4.977e-05	0.0002953
Ttll4	1.208	2.831	7.884	4.457e-05	0.0002751
Prr11	3.096	2.98	7.802	4.808e-05	0.0002889
Smc4	1.349	6.529	8.433	2.723e-05	0.0001961
Prelp	-3.906	5.858	-8.285	3.1e-05	0.0002134
Dtx3l	1.261	6.526	8.429	2.732e-05	0.0001964
Emilin2	5.667	4.555	7.808	4.783e-05	0.0002883
Nxpe2	-2.261	2.828	-7.89	4.432e-05	0.000274
Hspb1	-1.673	6.441	-8.409	2.782e-05	0.0001983
Olfm2	5.731	1.302	8.08	3.728e-05	0.0002431
Tmem64	-1.058	6.257	-8.41	2.778e-05	0.0001982
Cd48	5.746	2.945	7.725	5.167e-05	0.0003029
Cbfb	1.215	6.31	8.389	2.829e-05	0.0002005
Inhba	-3.394	1.154	-7.708	5.251e-05	0.0003057
Arid3a	1.651	2.596	7.777	4.922e-05	0.0002937
Gata2	-1.786	6.522	-8.376	2.863e-05	0.0002023
Car9	5.48	-0.9826	8.57	2.417e-05	0.0001828
Naaa	2.526	5.767	8.256	3.183e-05	0.0002173
Btbd3	-1.367	5.629	-8.341	2.951e-05	0.0002069
Cdkl2	-2.514	0.552	-7.725	5.169e-05	0.0003029
Svep1	-5.162	-1.734	-8.228	3.262e-05	0.0002214
Cdc45	2.274	2.506	7.727	5.157e-05	0.0003029
Rem1	-2.475	2.422	-7.774	4.939e-05	0.0002943
Irak3	-1.731	3.572	-7.995	4.026e-05	0.0002563
Cfb	3.164	6.529	8.274	3.133e-05	0.0002149
Elfn2	4.774	1.247	7.874	4.499e-05	0.0002766
Slc22a23	2.275	4.258	7.989	4.048e-05	0.000257
AI607873	6.385	2.667	7.75	5.047e-05	0.0002975
Ptafr	3.261	1.698	7.675	5.414e-05	0.0003129
Dusp26	1.669	3.377	7.86	4.558e-05	0.000279
Galnt3	5.675	1.078	8.065	3.778e-05	0.0002455
Klrg2	1.802	2.356	7.694	5.319e-05	0.0003091
Fsd1l	-1.66	2.176	-7.725	5.166e-05	0.0003029
Mlip	5.057	-1.2	8.536	2.49e-05	0.0001849
Fras1	-4.153	-0.5237	-7.976	4.097e-05	0.0002593
Agpat5	1.003	5.308	8.241	3.226e-05	0.0002197
Arpc1b	1.089	8.66	8.277	3.125e-05	0.0002144
Tbx4	2.23	3.384	7.805	4.796e-05	0.0002888
Bop1	1.253	5.517	8.249	3.201e-05	0.0002185
Stard10	-1.527	4.104	-8.055	3.811e-05	0.0002467
Ucn2	6.129	-1.656	8.507	2.554e-05	0.0001879
Atp6v1b2	1.037	6.978	8.332	2.974e-05	0.0002075
Magee1	-1.161	4.464	-8.127	3.571e-05	0.0002367
Pdyn	6.099	-1.14	8.442	2.701e-05	0.0001954
Zic1	-2.918	3.843	-7.939	4.236e-05	0.0002655
Kctd1	-1.226	3.755	-7.988	4.05e-05	0.000257
Shc3	3.922	1.299	7.713	5.228e-05	0.0003051
Ctsw	5.948	3.219	7.628	5.665e-05	0.0003233
Col13a1	-3.885	1.555	-7.621	5.7e-05	0.0003246
Rftn2	-1.191	4.909	-8.191	3.374e-05	0.0002267
Gm2027	-3.383	-0.7344	-7.962	4.148e-05	0.0002614
Fgd3	4.859	2.159	7.655	5.522e-05	0.0003179
Hook2	1.704	1.947	7.63	5.653e-05	0.000323
Rab17	5.57	-1.97	8.562	2.434e-05	0.0001831
Tacc3	3.324	3.412	7.706	5.26e-05	0.000306
Hivep1	-1.064	6.017	-8.298	3.067e-05	0.0002117
Cdc42ep5	-1.189	3.039	-7.836	4.661e-05	0.0002827
Ophn1	1.366	5.926	8.264	3.161e-05	0.0002162
Wfikkn2	-6.035	-0.8812	-8.006	3.987e-05	0.0002555
Fmod	-6.041	2.895	-7.619	5.713e-05	0.0003251
Aim1	-1.827	4.733	-8.125	3.577e-05	0.0002369
Alpk3	-4.678	-2.239	-8.217	3.294e-05	0.0002229
Arpc4	1.062	7.533	8.288	3.092e-05	0.0002131
Bcas1	4.304	4.772	7.818	4.737e-05	0.0002869
9330159F19Rik	3.671	1.032	7.712	5.23e-05	0.0003051
Efna1	-1.144	5.842	-8.266	3.155e-05	0.0002162
Stom	-2.168	7.459	-8.237	3.238e-05	0.0002203
Rhbdl2	4.111	2.226	7.58	5.924e-05	0.0003337
Svip	-2.163	2.268	-7.652	5.535e-05	0.0003183
Spred3	2.986	2.768	7.604	5.792e-05	0.0003289
Adgre1	4.129	5.859	7.991	4.04e-05	0.0002566
Arxes1	2.984	0.6177	7.69	5.339e-05	0.0003099
Tmem38a	-1.878	3.161	-7.787	4.875e-05	0.0002916
Ak6	1.031	3.71	7.865	4.535e-05	0.0002779
Sh3gl3	2.813	2.626	7.583	5.908e-05	0.0003331
Plekha5	-1.464	3.406	-7.844	4.624e-05	0.0002811
Zfp945	-1.212	3.939	-7.953	4.182e-05	0.0002632
Tmem164	1.016	4.843	8.079	3.731e-05	0.0002431
Igsf21	4.516	0.304	8	4.008e-05	0.000256
Dcaf12l1	-6.739	-0.2777	-7.892	4.423e-05	0.0002737
Dlgap5	6.771	0.8935	8.199	3.35e-05	0.0002257
Sass6	1.343	3.292	7.755	5.024e-05	0.0002967
Fut4	1.848	2.979	7.667	5.456e-05	0.0003147
Hyal3	-2.338	0.5589	-7.558	6.051e-05	0.0003395
Hipk2	1.121	3.697	7.842	4.635e-05	0.0002814
St8sia1	3.104	1.035	7.601	5.807e-05	0.0003295
Sgip1	-1.817	2.558	-7.669	5.449e-05	0.0003145
Oas2	2.458	3.797	7.749	5.054e-05	0.0002976
Krt18	-5.178	0.7853	-7.591	5.865e-05	0.0003315
Ppard	1.006	7.008	8.23	3.257e-05	0.0002213
Lhfpl3	8.192	1.734	8.141	3.527e-05	0.0002343
AW549877	-1.069	5.639	-8.181	3.404e-05	0.0002283
Gpr85	2.152	2.177	7.535	6.185e-05	0.0003452
Pkm	1.302	10.45	8.054	3.817e-05	0.0002468
Ptprb	-1.673	11.03	-7.996	4.023e-05	0.0002563
Fam161a	-1.875	1.601	-7.532	6.206e-05	0.0003459
Zfp449	-1.281	3.183	-7.763	4.986e-05	0.0002957
Gipc3	-1.325	3.852	-7.891	4.428e-05	0.0002739
H2afj	1.258	5.071	8.059	3.797e-05	0.0002463
Htatip2	1.048	3.882	7.85	4.6e-05	0.000281
Rgs10	3.573	5.358	7.911	4.346e-05	0.0002707
Cenpp	3.214	0.488	7.676	5.41e-05	0.0003129
Bzw2	1.596	5.183	8.052	3.822e-05	0.000247
5430416O09Rik	-2.26	4.542	-7.98	4.083e-05	0.0002586
Abhd3	-2.862	1.795	-7.518	6.291e-05	0.0003501
Mmp25	3.296	4.318	7.741	5.09e-05	0.0002995
Spp1	7.118	7.036	7.81	4.775e-05	0.0002883
Sfrp5	-5.255	-1.992	-7.976	4.096e-05	0.0002593
Pqlc3	-1.75	3.323	-7.757	5.016e-05	0.0002966
Synpo2l	-6.622	-0.4018	-7.814	4.757e-05	0.0002876
Eef1a1	1.036	12.56	7.905	4.37e-05	0.0002714
Lap3	1.108	7.505	8.174	3.424e-05	0.0002292
Lmo4	1.311	5.522	8.093	3.683e-05	0.0002413
Add2	4.753	1.271	7.632	5.641e-05	0.0003226
Slc9a3r2	-1.935	8.481	-8.097	3.671e-05	0.0002412
Rtn1	2.004	4.34	7.845	4.621e-05	0.0002811
Gsdmd	1.167	5.237	8.061	3.79e-05	0.0002461
Ccr1	5.842	2.855	7.49	6.461e-05	0.0003572
Skp2	1.731	1.983	7.492	6.448e-05	0.0003567
Neu1	1.06	5.261	8.068	3.766e-05	0.0002448
Fn3k	-3.822	0.336	-7.54	6.157e-05	0.000344
Dck	1.801	3.95	7.783	4.894e-05	0.0002924
Pcsk2	-5.183	-0.9169	-7.852	4.592e-05	0.0002807
Boc	-3.073	2.839	-7.602	5.802e-05	0.0003293
Rgs2	3.607	5.519	7.898	4.399e-05	0.0002727
Lat2	6.781	3.246	7.487	6.48e-05	0.0003578
Lama4	1.923	8.841	8.095	3.676e-05	0.0002413
Mylk4	-5.292	-0.5631	-7.808	4.78e-05	0.0002883
Oasl1	3.2	4.333	7.717	5.206e-05	0.0003042
Pcdhga9	-1.885	1.579	-7.471	6.578e-05	0.0003619
Ubxn11	-3.23	0.5205	-7.479	6.525e-05	0.0003595
Baz1a	3.113	5.183	7.876	4.49e-05	0.0002766
Rnaseh2b	1.04	3.634	7.737	5.11e-05	0.0003006
Rpl37	1.009	8.448	8.087	3.702e-05	0.0002422
Nxnl2	-5.598	-1.673	-7.845	4.622e-05	0.0002811
Lpin2	1.18	5.09	7.996	4.022e-05	0.0002563
Pltp	-2.217	10.96	-7.909	4.358e-05	0.0002711
Stxbp4	-1.398	3.847	-7.814	4.756e-05	0.0002876
Lrriq1	-6.945	-1.65	-7.779	4.915e-05	0.0002934
Taf6l	1.175	3.467	7.688	5.349e-05	0.0003103
Ccdc106	3.952	-0.05705	7.876	4.491e-05	0.0002766
Zfp704	-1.38	5.877	-8.096	3.674e-05	0.0002413
2310030G06Rik	-2.697	0.2667	-7.462	6.636e-05	0.0003637
Ddr2	-2.054	5.946	-8.069	3.763e-05	0.0002448
Nr5a2	-3.158	-0.7411	-7.674	5.421e-05	0.0003132
Spag8	-4.23	-2.033	-7.934	4.257e-05	0.0002663
Glb1l2	-3.552	-0.01553	-7.501	6.389e-05	0.0003543
Spag16	-4.936	-0.9691	-7.766	4.972e-05	0.0002953
[truncated: 2,647 more rows]

## Sheet: gProfiler pHGG EC enriched
source	term_name	term_id	adjusted_p_value	negative_log10_of_adjusted_p_value	term_size	query_size	intersection_size	effective_domain_size	intersections
GO:MF	protein binding	GO:0005515	3.54416e-30	29.4505	10189	1386	892	20802	CD244,IL13RA2,IL1B,APOB,CST7,LILRB4A,MLXIPL,HPSE,NLRP3,IL1RN,CRYBA4,CLEC7A,TIFAB,PPFIA4,MILR1,BCL2A1B,SCIMP,ITGAX,HK3,PIRB,PILRA,CD84,CD300LF,BCL2A1A,BTNL2,CTSS,DMRTB1,LAG3,SAA3,SPP1,DOCK2,FCGR1,MGARP,EMILIN2,HAVCR2,PRAM1,CLEC2I,RAC2,CD36,PIK3AP1,ARHGAP9,C3,IL1A,VAV1,CCDC88B,NCF4,BTK,C3AR1,A530064D06RIK,RUNX3,CLEC5A,C1QC,CCL4,TREM2,TLR7,CAPN3,LAT2,OSM,HVCN1,STRA6L,LRRC3,RAB39,LY86,NCF1,TNFRSF9,TN…
GO:MF	binding	GO:0005488	7.74162e-19	18.1112	14895	1386	1140	20802	CD244,IL13RA2,IL1B,ABCC3,DYRK4,APOB,CST7,LILRB4A,MLXIPL,HPSE,NLRP3,ITGAD,IL1RN,CRYBA4,CLEC7A,TIFAB,PPFIA4,MILR1,TBXAS1,BCL2A1B,ITGAM,SIGLECF,HCAR2,SCIMP,ITGAX,HK3,TRPM2,PIRB,PILRA,CD33,CD84,CD300LF,BCL2A1A,HAAO,H2-OA,BTNL2,SLC2A5,CTSS,DMRTB1,LAG3,CD72,SAA3,SPP1,DNASE1L3,DOCK2,FCGR1,MGARP,EMILIN2,GALNT3,HAVCR2,HRH2,PRAM1,CLEC2I,RAC2,CD36,PIK3AP1,EGLN3,ARHGAP9,C3,IL1A,VAV1,CCDC88B,NCF4,BTK,C3AR1,AR…
GO:MF	signaling receptor binding	GO:0005102	1.44525e-10	9.84006	1624	1386	184	20802	CD244,IL1B,APOB,LILRB4A,IL1RN,ITGAX,PILRA,CD300LF,BTNL2,LAG3,SAA3,SPP1,DOCK2,FCGR1,CLEC2I,CD36,PIK3AP1,C3,IL1A,CCL4,CAPN3,OSM,HCK,SLA,CD86,ATP1A3,CCL12,GNA15,BANK1,LGALS3,TNFSF13B,PTPN6,TNF,TNFSF14,2610528A11RIK,TYROBP,RELN,ERMAP,GPNMB,FGR,TICAM2,CCL3,FERMT3,ESM1,SH3BP1,CCL6,HCST,CCL2,PTPRC,TLR9,SHISA7,IRS4,IL16,TUBB3,INHBB,DOK2,VGF,PYCARD,CD74,CCL11,UCN2,KLRK1,TLR1,CCL9,SYT1,ARRB2,EBI3,TGFBI,PEN…
GO:MF	protein-containing complex binding	GO:0044877	3.2341e-10	9.49025	1464	1386	169	20802	IL1B,LILRB4A,ITGAD,BCL2A1B,PIRB,BCL2A1A,H2-OA,CTSS,SPP1,DOCK2,FCGR1,CD36,TREM2,H2-OB,FCGR4,AIF1,FYB,NCKAP1L,BCL2A1D,UGT1A7C,GNA15,ITGB2,LGALS3,FCER1G,CORO1A,ALOX5AP,ITGAL,PTPRN,PLCB2,GPNMB,FGR,MYO1G,CD8A,FERMT3,ESM1,HEXB,HMGA2,PTPRC,FMNL1,H2-AA,IRS4,KIF5A,H2-DMB2,HCN1,PIK3R5,GABRB3,HCLS1,INHBB,FLT3,C4B,RAB32,CD74,ACTR3B,MAFB,COTL1,MYO7A,MYO16,CEBPA,ARRB2,TGFBI,TLR2,ITGB3,APOBEC1,H2-DMA,MYO5A,USP1…
GO:MF	immune receptor activity	GO:0140375	2.34969e-09	8.62899	118	1386	32	20802	IL13RA2,GPR35,FCGR1,C3AR1,FCGR4,C5AR1,CCR1,CX3CR1,CCR5,CSF3R,C5AR2,FCER1G,CXCR2,CSF2RB,IL10RA,CCR6,IL21R,IL1RL2,CSF2RA,CSF2RB2,CD74,KLRK1,EBI3,CD44,IL17RA,CCRL2,CMKLR1,IL4RA,CXCR4,ACKR2,IFNGR2,EPOR
GO:MF	cytoskeletal protein binding	GO:0008092	5.08612e-09	8.29361	989	1386	123	20802	CCDC88B,CAPN3,AIF1,MYO1F,CCR5,CORO1A,WAS,PTPRN,TNNI2,MYO1G,TNS4,FMN1,CAPN6,PTPRC,FMNL1,PARVG,PDLIM4,RAB3B,NAV3,KIF5A,TTBK1,KIF21B,HCLS1,PYCARD,ARL4C,ACTR3B,COTL1,ATCAY,MYO7A,DCX,MYO16,S100A6,CRMP1,ANG,MYO5A,LSP1,S100A4,FSD1,ADD2,ESPN,SYN1,GMFG,RGS2,RGS14,ABI3,KIF5C,AXL,SPTBN2,MARCKSL1,ANK3,BIN1,CLIP4,MARCKS,CDK5R1,MAPK8IP2,LCP1,PPP1R9A,KCNQ2,RAB39B,ADSSL1,FBLIM1,DNM1,CXCR4,KIF2C,EPS8,STMN3,WASF1,…
GO:MF	identical protein binding	GO:0042802	1.62041e-08	7.79038	2140	1386	219	20802	CST7,NLRP3,CRYBA4,BCL2A1B,PIRB,CD84,BCL2A1A,PIK3AP1,BTK,CCL4,CAPN3,HVCN1,TNFRSF9,BCL2A1D,UGT1A7C,HPGDS,SLC11A1,TLR13,CCR5,CD53,TNF,TNFSF14,FCER1G,ARHGAP4,PLEK,CORO1A,RASAL3,ALOX5AP,WAS,TYROBP,CARD9,MCEMP1,CSF1R,CTSE,TFAP2B,CD8A,RASSF5,SYT4,BHLHE41,HEXB,SYT6,KLRB1B,ABCD2,TLR9,PDLIM4,SLAMF1,GPX3,HCN1,GABRB3,LYZ2,INHBB,PYCARD,PYGL,PYHIN1,CD79B,COL7A1,MAFB,TLR1,SYT1,MYO7A,PRKG2,CEBPA,PCBD1,ARRB2,TGFB…
GO:MF	molecular function regulator	GO:0098772	5.0304e-08	7.2984	1069	1386	127	20802	CST7,LILRB4A,IL1RN,DOCK2,CSN2,ARHGAP9,C3,VAV1,CAPN3,NCKAP1L,BCL2A1D,FGD2,COX6A2,RGS1,TNFSF14,ARHGAP4,RASAL3,LILR4B,PSD4,DENND1C,KCNE3,FXYD7,SH3BP1,CNIH2,RGS10,COL6A3,ARHGAP22,SIRPA,DOCK8,CNIH3,DGKI,PYCARD,TAGAP,RAP1GAP2,C4B,RASA4,COL7A1,RASGEF1B,KCNK2,WNK3,RAB3IL1,GMIP,CDKN2A,NAIP6,RGS7,CACNG5,NAIP5,IKBKE,ANGPT2,SCN1B,KCNIP1,KCNAB2,ADAP1,RASGEF1C,CCL5,RGS2,NAIP2,FGD3,RGS17,GUCA1A,RGS14,ARHGDIG,EL…
GO:MF	hydrolase activity	GO:0016787	8.19043e-08	7.08669	2353	1386	233	20802	KLK9,HPSE,TRPM2,CTSS,DNASE1L3,PTPN7,RAC2,CAPN3,RAB39,F9,GNA15,CCR1,MYO1F,PLD4,UNC5CL,TLR13,GNG3,PTPN6,RNASE1,CELA1,PTPRN,PLCB2,RELN,CLEC4A3,CTSE,MYO1G,LIPH,ALOX15,RHOH,DUSP27,PLCH1,HEXB,IL1RL2,EYA4,CAPN6,ALOX5,RAB20,PTPRC,PDE3B,RNASE6,C2,TLR12,RAB3B,RAB15,KIF5A,MMEL1,DUSP9,LGMN,TUBB3,KIF21B,DIRAS1,NAAA,LYZ2,LACC1,CFI,PYCARD,PFKFB4,RAB32,PLA2G2D,TLR1,RAB7B,ATCAY,MYO7A,AMZ1,MYO16,PTPRN2,DUSP26,ACP5…
GO:MF	carbohydrate derivative binding	GO:0097367	3.1472e-07	6.50208	2248	1386	222	20802	ABCC3,DYRK4,APOB,HPSE,NLRP3,SIGLECF,HCAR2,HK3,TRPM2,CD33,CTSS,RAC2,BTK,ARL11,RUNX3,TREM2,RAB39,HCK,ATP1A3,GNA15,ADCY7,MYO1F,PTAFR,MAP3K19,CSF1R,GPNMB,FGR,MYO1G,GAP43,LIPH,RHOH,CCL2,RAB20,PTPRC,HK2,OAS3,AK1,LRGUK,NLRP1B,ABCD2,MATK,RAB3B,RAB15,NAV3,KIF5A,TUBB3,HCN1,TTBK1,PAK3,KIF21B,DIRAS1,DGKI,FLT3,STK32A,PYGL,ARL4C,PFKFB4,POSTN,PIK3CD,RAB32,RUNX1,PLA2G2D,ACTR3B,ACSS1,RAB7B,MYO7A,MYO16,PRKG2,WNK3,…
GO:MF	enzyme regulator activity	GO:0030234	1.97862e-06	5.70364	881	1386	105	20802	CST7,LILRB4A,DOCK2,CSN2,ARHGAP9,C3,VAV1,CAPN3,NCKAP1L,BCL2A1D,FGD2,COX6A2,RGS1,TNFSF14,ARHGAP4,RASAL3,LILR4B,PSD4,DENND1C,SH3BP1,RGS10,COL6A3,ARHGAP22,SIRPA,DOCK8,DGKI,PYCARD,TAGAP,RAP1GAP2,C4B,RASA4,COL7A1,RASGEF1B,RAB3IL1,GMIP,CDKN2A,NAIP6,RGS7,NAIP5,IKBKE,ADAP1,RASGEF1C,RGS2,NAIP2,FGD3,RGS17,GUCA1A,RGS14,ARHGDIG,ELFN2,ARAP1,CYTH4,CTSC,BIN1,ARHGAP15,DOCK11,ARHGDIB,ARHGAP33,HPS4,THY1,CD109,TIMP2…
GO:MF	cytokine receptor activity	GO:0004896	4.09011e-06	5.38827	94	1386	24	20802	IL13RA2,GPR35,CCR1,CX3CR1,CCR5,CSF3R,CXCR2,CSF2RB,IL10RA,CCR6,IL21R,IL1RL2,CSF2RA,CSF2RB2,CD74,EBI3,CD44,IL17RA,CCRL2,IL4RA,CXCR4,ACKR2,IFNGR2,EPOR
GO:MF	cell adhesion molecule binding	GO:0050839	7.31959e-06	5.13551	272	1386	45	20802	IL1B,LILRB4A,SPP1,CD200R1,ITGB2,PTPN6,ITGAL,GPNMB,FERMT3,ESM1,SIRPA,POSTN,CDH19,TGFBI,ITGB3,DSCAM,SYK,PTPRO,CDH24,PTPRZ1,COL4A3,CDH13,ANK3,MMP14,CDK5R1,LCP1,THY1,LAMB1,TIMP2,EMILIN1,NLGN3,CD9,CTNNA2,PKP2,PLXNB3,CIB2,TRPC4,S1PR2,P2RX4,GFRA1,COL16A1,TNR,NRXN2,LYN,PTPRJ
GO:MF	GTPase regulator activity	GO:0030695	2.04258e-05	4.68982	439	1386	61	20802	DOCK2,ARHGAP9,VAV1,NCKAP1L,FGD2,RGS1,ARHGAP4,RASAL3,PSD4,DENND1C,SH3BP1,RGS10,ARHGAP22,SIRPA,DOCK8,DGKI,TAGAP,RAP1GAP2,RASA4,RASGEF1B,RAB3IL1,GMIP,RGS7,ADAP1,RASGEF1C,RGS2,FGD3,RGS17,RGS14,ARHGDIG,ARAP1,CYTH4,ARHGAP15,DOCK11,ARHGDIB,ARHGAP33,HPS4,THY1,AGAP2,RAP1GAP,GPSM3,ARHGEF26,VAV2,RASAL1,DENND4B,ARHGAP39,MYO9B,RASA3,ARHGAP11A,SPATA13,DOCK10,ARHGAP24,RINL,ARHGEF39,RCC1,DENND2A,IQGAP3,TBC1D8,TB…
GO:MF	enzyme activator activity	GO:0008047	3.65131e-05	4.43755	671	1386	82	20802	DOCK2,ARHGAP9,VAV1,NCF4,BTK,NCF1,NCKAP1L,FGD2,RGS1,ARHGAP4,RASAL3,ALOX5AP,PSD4,DENND1C,CCL3,SH3BP1,RGS10,ARHGAP22,DOCK8,NCF2,PYCARD,TAGAP,RAP1GAP2,RASA4,RASGEF1B,RAB3IL1,GMIP,APOBEC1,RGS7,ERBB3,ADAP1,RASGEF1C,CCL5,RGS2,FGD3,RGS17,GUCA1A,RGS14,ARHGDIG,ARAP1,CYTH4,LTC4S,GM2A,CTSC,CDK5R1,MAPK8IP2,ARHGAP15,DOCK11,PRKCD,ARHGDIB,ARHGAP33,HPS4,THY1,SEC14L2,AGAP2,APOE,RAP1GAP,ARHGEF26,VAV2,RASAL1,DENND4B…
GO:MF	anion binding	GO:0043168	9.73602e-05	4.01162	2420	1386	223	20802	ABCC3,DYRK4,NLRP3,SIGLECF,HCAR2,HK3,TRPM2,CD33,RAC2,CD36,EGLN3,ARHGAP9,BTK,ARL11,RUNX3,RAB39,NCF1,HCK,AFP,ATP1A3,GNA15,ADCY7,MYO1F,PLEK,ALOX5AP,MAP3K19,APOC1,CSF1R,FGR,MYO1G,GAP43,ALOX15,RHOH,RAB20,HK2,OAS3,AK1,LRGUK,NLRP1B,ABCD2,CYBB,MATK,RAB3B,RAB15,NAV3,KIF5A,SLC46A1,TUBB3,HCN1,TTBK1,PAK3,KIF21B,DIRAS1,DGKI,FLT3,STK32A,PYGL,ARL4C,PFKFB4,PIK3CD,RAB32,RUNX1,ACTR3B,ACSS1,SYT1,RAB7B,MYO7A,MYO16,PR…
GO:MF	nucleoside-triphosphatase regulator activity	GO:0060589	0.000101446	3.99377	480	1386	63	20802	DOCK2,ARHGAP9,VAV1,NCKAP1L,FGD2,RGS1,ARHGAP4,RASAL3,PSD4,DENND1C,SH3BP1,RGS10,ARHGAP22,SIRPA,DOCK8,DGKI,TAGAP,RAP1GAP2,RASA4,RASGEF1B,RAB3IL1,GMIP,RGS7,ADAP1,RASGEF1C,RGS2,FGD3,RGS17,RGS14,ARHGDIG,ARAP1,CYTH4,ARHGAP15,DOCK11,ARHGDIB,ARHGAP33,HPS4,THY1,AGAP2,RAP1GAP,GPSM3,ARHGEF26,VAV2,RASAL1,DENND4B,ARHGAP39,MYO9B,RASA3,ARHGAP11A,SPATA13,DOCK10,ARHGAP24,RINL,ARHGEF39,RCC1,DENND2A,IQGAP3,HSCB,TBC1…
GO:MF	GTPase activator activity	GO:0005096	0.00016154	3.79172	423	1386	57	20802	DOCK2,ARHGAP9,VAV1,NCKAP1L,FGD2,RGS1,ARHGAP4,RASAL3,PSD4,DENND1C,SH3BP1,RGS10,ARHGAP22,DOCK8,TAGAP,RAP1GAP2,RASA4,RASGEF1B,RAB3IL1,GMIP,RGS7,ADAP1,RASGEF1C,RGS2,FGD3,RGS17,RGS14,ARHGDIG,ARAP1,CYTH4,ARHGAP15,DOCK11,ARHGDIB,ARHGAP33,HPS4,THY1,AGAP2,RAP1GAP,ARHGEF26,VAV2,RASAL1,DENND4B,ARHGAP39,MYO9B,RASA3,ARHGAP11A,SPATA13,DOCK10,ARHGAP24,RINL,ARHGEF39,RCC1,DENND2A,IQGAP3,TBC1D8,TBC1D16,SERGEF
GO:MF	phosphorylation-dependent protein binding	GO:0140031	0.000307403	3.51229	7	1386	6	20802	VAV1,PTPN6,ANK3,PLCG2,LYN,ANK2
GO:MF	cation channel activity	GO:0005261	0.000396344	3.40193	321	1386	46	20802	TRPM2,HVCN1,CACNA1S,KCNE3,CACNG8,KCND1,SCN8A,HCN1,KCNK10,KCNK13,SCN11A,KCNK2,KCNK6,CACNG5,SCN1B,PTK2B,KCNIP1,KCNAB2,KCNG2,NALCN,GRIK3,CACNG4,ORAI2,MARCKSL1,GRIK4,P2RX7,TRPV2,KCNQ2,SLC24A1,CHRNA4,KCNMB4,PIEZO2,RASA3,KCNQ4,TRPC4,KCNIP3,P2RX4,PANX1,KCNJ2,KCNN4,GRIA4,KCNA6,TPCN2,GRIK5,ANXA6,KCNJ15
GO:MF	carbohydrate binding	GO:0030246	0.000894711	3.04832	280	1386	41	20802	CLEC7A,SIGLECF,HK3,CD33,SLC2A5,CD72,GALNT3,CLEC2I,EGLN3,CLEC5A,LGALS3,CLEC2L,CLEC4A3,HEXB,HK2,KLRB1B,GALNT12,PYGL,CLEC4A2,C4B,KLRK1,PPP1R3B,LGALS1,MAN2B1,NCAN,SLC2A3,CD69,ENPP1,GALNT6,BCAN,PGD,MLEC,FBP1,GUSB,LOXL2,PPP1R3D,PRPS2,MAN2B2,G6PDX,ALDOA,P4HA1
GO:MF	kinase binding	GO:0019900	0.00101573	2.99322	820	1386	90	20802	MLXIPL,ITGAX,PRAM1,RAC2,TREM2,BANK1,CCR5,BLNK,PTPN6,PTAFR,PLEK,WAS,FGR,CD8A,RHOH,PTPRC,SIRPA,DUSP9,HCLS1,DOK2,KLRK1,DCX,CEBPA,ARRB2,RAB3IL1,ITGB3,EEF1A2,SHC4,CDKN2A,MYO5A,CEBPB,DSCAM,PTPN5,ANGPT2,SYK,PTK2B,ADD2,SYN1,RGS14,CAMK2B,NOX4,IRF5,SHC2,SLC2A3,MARCKS,STX1B,CDK5R1,MAPK8IP2,PPP1R9A,DNM1,PRKCD,ARHGAP33,THY1,CASP1,AGAP2,CDC25C,PLCG2,MAPT,NELL2,CCNE1,JAKMIP2,DUSP2,PAK1,DLG4,HDAC9,TRIB3,PKP2,RAC…
GO:MF	catalytic activity	GO:0003824	0.00108138	2.96602	5665	1386	453	20802	KLK9,DYRK4,HPSE,B3GNT7,TBXAS1,HK3,TRPM2,HAL,HAAO,CTSS,DNASE1L3,PTPN7,GALNT3,RAC2,EGLN3,NCF4,BTK,CAPN3,RAB39,NCF1,GAL3ST4,F9,HCK,SLA,UGT1A7C,GNA15,CCR1,ADCY7,MYO1F,HPGDS,PLD4,UNC5CL,TLR13,LPCAT2,GNG3,COX6A2,AA467197,PTPN6,RNASE1,CYP4F18,CELA1,ALOX5AP,CAR9,MAP3K19,PTPRN,PLCB2,CSF1R,RNF180,RELN,CLEC4A3,CTSE,IFI30,FGR,MYO1G,PTGS1,LIPH,ALOX15,NEURL1A,RHOH,CCL3,B4GALNT1,RNF128,DUSP27,PLCH1,HEXB,IL1RL2,…
GO:MF	actin binding	GO:0003779	0.00157265	2.80337	443	1386	56	20802	AIF1,MYO1F,CCR5,CORO1A,WAS,TNNI2,MYO1G,TNS4,FMN1,FMNL1,PARVG,PDLIM4,HCLS1,ACTR3B,COTL1,MYO7A,MYO16,ANG,MYO5A,LSP1,S100A4,ADD2,ESPN,SYN1,GMFG,ABI3,SPTBN2,MARCKSL1,BIN1,MARCKS,CDK5R1,LCP1,PPP1R9A,ADSSL1,CXCR4,EPS8,WASF1,DBN1,PDLIM1,MYO9B,ABLIM3,CTNNA2,FMN2,PANX1,SAMD14,CAPG,WIPF1,IQGAP3,MAP1S,PFN1,CAPZA1,NCALD,SYNPO,ANXA6,FSCN1,SSH2
GO:MF	protein kinase binding	GO:0019901	0.00164267	2.78445	736	1386	82	20802	MLXIPL,ITGAX,PRAM1,RAC2,TREM2,BANK1,CCR5,BLNK,PTPN6,PTAFR,PLEK,WAS,FGR,CD8A,RHOH,PTPRC,SIRPA,DUSP9,HCLS1,DOK2,DCX,ARRB2,ITGB3,EEF1A2,SHC4,CDKN2A,MYO5A,DSCAM,PTPN5,ANGPT2,SYK,PTK2B,ADD2,SYN1,RGS14,CAMK2B,NOX4,IRF5,SHC2,MARCKS,STX1B,CDK5R1,MAPK8IP2,PPP1R9A,DNM1,PRKCD,ARHGAP33,THY1,AGAP2,CDC25C,PLCG2,MAPT,NELL2,CCNE1,DUSP2,PAK1,DLG4,HDAC9,TRIB3,PKP2,RAC3,CCNB1,PLK1,FBXO5,TOP2A,PRKAR1B,CKS1B,TRAF4,FA…
GO:MF	purinergic nucleotide receptor activity	GO:0001614	0.00191411	2.71803	21	1386	9	20802	HCAR2,P2RY13,P2RY6,PTAFR,P2RY12,GPR34,P2RX7,P2RY2,P2RX4
GO:MF	nucleotide receptor activity	GO:0016502	0.00191411	2.71803	21	1386	9	20802	HCAR2,P2RY13,P2RY6,PTAFR,P2RY12,GPR34,P2RX7,P2RY2,P2RX4
GO:MF	lipid binding	GO:0008289	0.00194937	2.7101	786	1386	86	20802	APOB,CD300LF,PRAM1,CD36,ARHGAP9,C3,NCF4,BTK,TREM2,NCF1,BIN2,AFP,FYB,FGD2,PTAFR,ALOX5AP,APOC1,CD300A,PSD4,PLCB2,DENND1C,MYO1G,GAP43,ALOX15,TICAM2,SYT4,SYT6,SNX20,HCN1,RASA4,PLA2G2D,TLR1,SYT1,TLR2,OSBP2,SOAT1,ADAP1,SNX22,ARAP1,NME4,CYTH4,FABP5,LTC4S,AXL,SPTBN2,DAPP1,BIN1,P2RX7,DAB1,SH3GL3,PCTP,ARHGAP33,THY1,LAMB1,SOAT2,NPC2,SEC14L2,APOE,SNX10,RASAL1,UNC13A,TLR4,SNX5,PSAP,ATP13A2,PHLDA3,SNX30,SH3PXD…
GO:MF	transporter activity	GO:0005215	0.00219327	2.65891	1137	1386	115	20802	ABCC3,APOB,TRPM2,SLC2A5,CD36,SPNS3,HVCN1,ATP1A3,CACNA1S,SLC11A1,COX6A2,AA467197,SLC37A2,SLC16A3,KCNE3,SLCO4A1,SLC7A14,SV2C,CACNG8,KCND1,ABCD2,CYBB,SCN8A,SLC46A1,HCN1,KCNK10,GABRB3,KCNK13,SCN11A,SLC7A7,SLC39A14,SLC16A10,SLC2A6,KCNK2,SLC15A3,S100A6,SLC13A3,OSBP2,ATP8A2,KCNK6,CACNG5,ABCB1B,SCN1B,PTK2B,KCNIP1,KCNAB2,KCNG2,SLC9A9,SLC38A6,SLC41A2,NALCN,HRH1,GRIK3,GRIA2,CLCA3A1,SLC16A6,CACNG4,FABP5,SLC3…
GO:MF	adenyl ribonucleotide binding	GO:0032559	0.00281716	2.55019	1556	1386	148	20802	ABCC3,DYRK4,NLRP3,HK3,BTK,RUNX3,HCK,ATP1A3,ADCY7,MYO1F,MAP3K19,CSF1R,FGR,MYO1G,HK2,OAS3,AK1,LRGUK,NLRP1B,ABCD2,MATK,NAV3,KIF5A,HCN1,TTBK1,PAK3,KIF21B,DGKI,FLT3,STK32A,PYGL,PFKFB4,PIK3CD,RUNX1,ACTR3B,ACSS1,MYO7A,MYO16,PRKG2,WNK3,CDKL1,ATP8A2,MYO5A,NAIP6,ERBB3,NAIP5,NTPCR,ABCB1B,SOAT1,IKBKE,SYK,PTK2B,RNASEL,DNA2,SYN1,PIK3CG,NAIP2,NME4,CAMK2A,KIF5C,PDGFRA,AXL,CAMK2B,ADCY3,CDK18,LMTK3,CHD7,P2RX7,CAMK…
GO:MF	enzyme binding	GO:0019899	0.00288924	2.53922	2164	1386	195	20802	APOB,LILRB4A,MLXIPL,ITGAX,HK3,PRAM1,RAC2,BTK,RUNX3,TREM2,CAPN3,UGT1A7C,BANK1,LGALS3,CCR5,SPI1,BLNK,PTPN6,TNF,PTAFR,PLEK,ALOX5AP,WAS,PTPRN,CD300A,LILR4B,CSF1R,RNF180,FGR,CD8A,RHOH,FXYD7,RASSF5,BHLHE41,HMGA2,PTPRC,NFATC2,LAPTM5,FMNL1,NLRP1B,PDLIM4,SIRPA,DUSP9,NCF2,PAK3,HCLS1,DGKI,DOK2,PYCARD,CD74,TCERG1L,KLRK1,COTL1,UNC13D,DCX,MYO16,CEBPA,ARRB2,RAB3IL1,ITGB3,EEF1A2,PPP1R3B,SHC4,CDKN2A,MYO5A,CEBPB,E…
GO:MF	adenyl nucleotide binding	GO:0030554	0.00294584	2.53079	1570	1386	149	20802	ABCC3,DYRK4,NLRP3,HK3,BTK,RUNX3,HCK,ATP1A3,ADCY7,MYO1F,MAP3K19,CSF1R,FGR,MYO1G,HK2,OAS3,AK1,LRGUK,NLRP1B,ABCD2,MATK,NAV3,KIF5A,HCN1,TTBK1,PAK3,KIF21B,DGKI,FLT3,STK32A,PYGL,PFKFB4,PIK3CD,RUNX1,ACTR3B,ACSS1,MYO7A,MYO16,PRKG2,WNK3,CDKL1,ATP8A2,MYO5A,NAIP6,ERBB3,NAIP5,NTPCR,ABCB1B,SOAT1,IKBKE,SYK,PTK2B,RNASEL,DNA2,SYN1,PIK3CG,NAIP2,NME4,CAMK2A,KIF5C,PDGFRA,AXL,CAMK2B,ADCY3,CDK18,LMTK3,CHD7,P2RX7,CAMK…
GO:MF	purine ribonucleoside triphosphate binding	GO:0035639	0.00302058	2.51991	1840	1386	170	20802	ABCC3,DYRK4,NLRP3,HCAR2,HK3,RAC2,BTK,ARL11,RUNX3,RAB39,HCK,ATP1A3,GNA15,ADCY7,MYO1F,MAP3K19,CSF1R,FGR,MYO1G,RHOH,RAB20,HK2,OAS3,AK1,LRGUK,NLRP1B,ABCD2,MATK,RAB3B,RAB15,NAV3,KIF5A,TUBB3,TTBK1,PAK3,KIF21B,DIRAS1,DGKI,FLT3,STK32A,PYGL,ARL4C,PFKFB4,PIK3CD,RAB32,RUNX1,ACTR3B,ACSS1,RAB7B,MYO7A,MYO16,PRKG2,WNK3,EEF1A2,CDKL1,ATP8A2,MYO5A,NAIP6,ERBB3,NAIP5,NTPCR,ABCB1B,GNAZ,IKBKE,SYK,PTK2B,RNASEL,DNA2,SYN…
GO:MF	purine ribonucleotide binding	GO:0032555	0.00314909	2.50182	1919	1386	176	20802	ABCC3,DYRK4,NLRP3,HCAR2,HK3,RAC2,BTK,ARL11,RUNX3,RAB39,HCK,ATP1A3,GNA15,ADCY7,MYO1F,MAP3K19,CSF1R,FGR,MYO1G,RHOH,RAB20,HK2,OAS3,AK1,LRGUK,NLRP1B,ABCD2,MATK,RAB3B,RAB15,NAV3,KIF5A,TUBB3,HCN1,TTBK1,PAK3,KIF21B,DIRAS1,DGKI,FLT3,STK32A,PYGL,ARL4C,PFKFB4,PIK3CD,RAB32,RUNX1,ACTR3B,ACSS1,RAB7B,MYO7A,MYO16,PRKG2,WNK3,EEF1A2,CDKL1,ATP8A2,MYO5A,NAIP6,ERBB3,NAIP5,NTPCR,ABCB1B,GNAZ,SOAT1,IKBKE,SYK,PTK2B,RNAS…
GO:MF	integrin binding	GO:0005178	0.00328482	2.48349	132	1386	24	20802	IL1B,LILRB4A,SPP1,GPNMB,FERMT3,ESM1,TGFBI,ITGB3,SYK,PTPRZ1,COL4A3,MMP14,LCP1,THY1,LAMB1,TIMP2,EMILIN1,CD9,CIB2,S1PR2,GFRA1,COL16A1,TNR,LYN
GO:MF	purine nucleotide binding	GO:0017076	0.00335282	2.47459	1934	1386	177	20802	ABCC3,DYRK4,NLRP3,HCAR2,HK3,RAC2,BTK,ARL11,RUNX3,RAB39,HCK,ATP1A3,GNA15,ADCY7,MYO1F,MAP3K19,CSF1R,FGR,MYO1G,RHOH,RAB20,HK2,OAS3,AK1,LRGUK,NLRP1B,ABCD2,MATK,RAB3B,RAB15,NAV3,KIF5A,TUBB3,HCN1,TTBK1,PAK3,KIF21B,DIRAS1,DGKI,FLT3,STK32A,PYGL,ARL4C,PFKFB4,PIK3CD,RAB32,RUNX1,ACTR3B,ACSS1,RAB7B,MYO7A,MYO16,PRKG2,WNK3,EEF1A2,CDKL1,ATP8A2,MYO5A,NAIP6,ERBB3,NAIP5,NTPCR,ABCB1B,GNAZ,SOAT1,IKBKE,SYK,PTK2B,RNAS…
GO:MF	ATP binding	GO:0005524	0.00361188	2.44227	1487	1386	142	20802	ABCC3,DYRK4,NLRP3,HK3,BTK,RUNX3,HCK,ATP1A3,ADCY7,MYO1F,MAP3K19,CSF1R,FGR,MYO1G,HK2,OAS3,AK1,LRGUK,NLRP1B,ABCD2,MATK,NAV3,KIF5A,TTBK1,PAK3,KIF21B,DGKI,FLT3,STK32A,PYGL,PFKFB4,PIK3CD,RUNX1,ACTR3B,ACSS1,MYO7A,MYO16,PRKG2,WNK3,CDKL1,ATP8A2,MYO5A,NAIP6,ERBB3,NAIP5,NTPCR,ABCB1B,IKBKE,SYK,PTK2B,RNASEL,DNA2,SYN1,PIK3CG,NAIP2,NME4,CAMK2A,KIF5C,PDGFRA,AXL,CAMK2B,ADCY3,CDK18,LMTK3,CHD7,P2RX7,CAMKK1,TGFBR1,A…
GO:MF	ribonucleotide binding	GO:0032553	0.00367808	2.43438	1937	1386	177	20802	ABCC3,DYRK4,NLRP3,HCAR2,HK3,RAC2,BTK,ARL11,RUNX3,RAB39,HCK,ATP1A3,GNA15,ADCY7,MYO1F,MAP3K19,CSF1R,FGR,MYO1G,RHOH,RAB20,HK2,OAS3,AK1,LRGUK,NLRP1B,ABCD2,MATK,RAB3B,RAB15,NAV3,KIF5A,TUBB3,HCN1,TTBK1,PAK3,KIF21B,DIRAS1,DGKI,FLT3,STK32A,PYGL,ARL4C,PFKFB4,PIK3CD,RAB32,RUNX1,ACTR3B,ACSS1,RAB7B,MYO7A,MYO16,PRKG2,WNK3,EEF1A2,CDKL1,ATP8A2,MYO5A,NAIP6,ERBB3,NAIP5,NTPCR,ABCB1B,GNAZ,SOAT1,IKBKE,SYK,PTK2B,RNAS…
GO:MF	Toll-like receptor binding	GO:0035325	0.00370747	2.43092	13	1386	7	20802	SAA3,CD36,TLR1,TLR2,SYK,UNC93B1,TLR6
GO:MF	MHC class II protein complex binding	GO:0023026	0.00397446	2.40072	6	1386	5	20802	H2-OA,H2-OB,H2-DMB2,CD74,H2-DMA
GO:MF	cation transmembrane transporter activity	GO:0008324	0.00444795	2.35184	616	1386	70	20802	TRPM2,HVCN1,ATP1A3,CACNA1S,SLC11A1,COX6A2,AA467197,KCNE3,CACNG8,KCND1,SCN8A,SLC46A1,HCN1,KCNK10,KCNK13,SCN11A,SLC39A14,KCNK2,SLC13A3,KCNK6,CACNG5,SCN1B,PTK2B,KCNIP1,KCNAB2,KCNG2,SLC9A9,SLC38A6,SLC41A2,NALCN,HRH1,GRIK3,CACNG4,SLC38A1,ORAI2,MARCKSL1,GRIK4,P2RX7,TRPV2,KCNQ2,SLC24A1,CHRNA4,SLC41A3,KCNMB4,SLC8A1,PIEZO2,SLC1A5,RASA3,ATP13A2,KCNQ4,SFXN2,TRPC4,KCNIP3,SLC15A4,P2RX4,PANX1,KCNJ2,KCNN4,MFSD1…
GO:MF	phospholipid binding	GO:0005543	0.00491441	2.30853	449	1386	55	20802	APOB,CD300LF,ARHGAP9,NCF4,BTK,TREM2,NCF1,BIN2,FGD2,PTAFR,CD300A,PLCB2,DENND1C,MYO1G,GAP43,ALOX15,TICAM2,SYT4,SYT6,SNX20,HCN1,RASA4,PLA2G2D,SYT1,ADAP1,SNX22,ARAP1,NME4,AXL,SPTBN2,DAPP1,BIN1,DAB1,PCTP,ARHGAP33,THY1,APOE,SNX10,RASAL1,UNC13A,SNX5,PSAP,ATP13A2,PHLDA3,SNX30,SH3PXD2B,KCNJ2,SYT12,ATP8B1,PLEKHB2,CLN6,PFN1,GRAMD1B,ANXA6,SMPD3
GO:MF	cytokine binding	GO:0019955	0.00719726	2.14283	138	1386	24	20802	IL13RA2,IL1RN,CD36,TNFRSF9,CCR1,CX3CR1,CCR5,CSF3R,CXCR2,CSF1R,IL10RA,CCR6,CSF2RA,CD74,EBI3,ITGB3,CCRL2,TGFBR1,NRROS,CXCR4,CD109,TSKU,ACKR2,KIT
GO:MF	ion binding	GO:0043167	0.00719741	2.14282	5862	1386	460	20802	ABCC3,DYRK4,NLRP3,ITGAD,CLEC7A,TBXAS1,ITGAM,SIGLECF,HCAR2,ITGAX,HK3,TRPM2,CD33,HAAO,DMRTB1,GALNT3,HAVCR2,RAC2,CD36,EGLN3,ARHGAP9,IL1A,VAV1,BTK,ARL11,RUNX3,CAPN3,RAB39,NCF1,F9,HCK,AIF1,AFP,ATP1A3,ADGRE1,FGD2,GNA15,ADCY7,SUSD1,MYO1F,ITGB2,HPGDS,CACNA1S,LPCAT2,FCER1G,PLEK,CYP4F18,RXRG,CELA1,ALOX5AP,CAR9,MAP3K19,ITGAL,TYROBP,APOC1,PLCB2,CSF1R,RNF180,RELN,TNNI2,FGR,MYO1G,PTGS1,GAP43,FBN2,ALOX15,NEURL1…
GO:MF	small molecule binding	GO:0036094	0.00753316	2.12302	2543	1386	221	20802	ABCC3,DYRK4,NLRP3,SIGLECF,HCAR2,HK3,HAAO,SLC2A5,RAC2,CD36,EGLN3,BTK,ARL11,RUNX3,RAB39,HCK,ATP1A3,GNA15,ADCY7,MYO1F,P2RY6,ALOX5AP,MAP3K19,CSF1R,FGR,MYO1G,RHOH,RAB20,HK2,OAS3,AK1,LRGUK,NLRP1B,ABCD2,CYBB,MATK,RAB3B,RAB15,NAV3,KIF5A,SLC46A1,TUBB3,HCN1,TTBK1,PAK3,KIF21B,DIRAS1,DGKI,FLT3,STK32A,PYGL,ARL4C,PFKFB4,PIK3CD,CLEC4A2,RAB32,RUNX1,ACTR3B,ACSS1,RAB7B,MYO7A,MYO16,PRKG2,WNK3,EEF1A2,PLCL2,OSBP2,CDK…
GO:MF	nucleotide binding	GO:0000166	0.00771323	2.11276	2185	1386	194	20802	ABCC3,DYRK4,NLRP3,HCAR2,HK3,RAC2,BTK,ARL11,RUNX3,RAB39,HCK,ATP1A3,GNA15,ADCY7,MYO1F,P2RY6,MAP3K19,CSF1R,FGR,MYO1G,RHOH,RAB20,HK2,OAS3,AK1,LRGUK,NLRP1B,ABCD2,CYBB,MATK,RAB3B,RAB15,NAV3,KIF5A,TUBB3,HCN1,TTBK1,PAK3,KIF21B,DIRAS1,DGKI,FLT3,STK32A,PYGL,ARL4C,PFKFB4,PIK3CD,RAB32,RUNX1,ACTR3B,ACSS1,RAB7B,MYO7A,MYO16,PRKG2,WNK3,EEF1A2,CDKL1,ATP8A2,MYO5A,NT5E,NAIP6,ERBB3,NAIP5,NTPCR,ABCB1B,GNAZ,SOAT1,IKBK…
GO:MF	nucleoside phosphate binding	GO:1901265	0.00771323	2.11276	2185	1386	194	20802	ABCC3,DYRK4,NLRP3,HCAR2,HK3,RAC2,BTK,ARL11,RUNX3,RAB39,HCK,ATP1A3,GNA15,ADCY7,MYO1F,P2RY6,MAP3K19,CSF1R,FGR,MYO1G,RHOH,RAB20,HK2,OAS3,AK1,LRGUK,NLRP1B,ABCD2,CYBB,MATK,RAB3B,RAB15,NAV3,KIF5A,TUBB3,HCN1,TTBK1,PAK3,KIF21B,DIRAS1,DGKI,FLT3,STK32A,PYGL,ARL4C,PFKFB4,PIK3CD,RAB32,RUNX1,ACTR3B,ACSS1,RAB7B,MYO7A,MYO16,PRKG2,WNK3,EEF1A2,CDKL1,ATP8A2,MYO5A,NT5E,NAIP6,ERBB3,NAIP5,NTPCR,ABCB1B,GNAZ,SOAT1,IKBK…
GO:MF	metal ion transmembrane transporter activity	GO:0046873	0.00771411	2.11271	412	1386	51	20802	TRPM2,ATP1A3,CACNA1S,SLC11A1,KCNE3,CACNG8,KCND1,SCN8A,HCN1,KCNK10,KCNK13,SCN11A,SLC39A14,KCNK2,SLC13A3,KCNK6,CACNG5,SCN1B,KCNIP1,KCNAB2,KCNG2,SLC9A9,HRH1,GRIK3,CACNG4,SLC38A1,ORAI2,MARCKSL1,GRIK4,TRPV2,KCNQ2,SLC24A1,KCNMB4,SLC8A1,RASA3,KCNQ4,TRPC4,KCNIP3,P2RX4,PANX1,KCNJ2,KCNN4,KCNA6,SLC39A4,SLC12A9,SLC39A6,SLC39A11,TPCN2,GRIK5,ANXA6,KCNJ15
GO:MF	superoxide-generating NAD(P)H oxidase activity	GO:0016175	0.0077397	2.11128	10	1386	6	20802	NCF4,NCF1,CYBB,NCF2,NOX4,CYBA
GO:MF	chemokine receptor activity	GO:0004950	0.0104275	1.98182	25	1386	9	20802	GPR35,CCR1,CX3CR1,CCR5,CXCR2,CCR6,CCRL2,CXCR4,ACKR2
GO:MF	G protein-coupled chemoattractant receptor activity	GO:0001637	0.0104275	1.98182	25	1386	9	20802	GPR35,CCR1,CX3CR1,CCR5,CXCR2,CCR6,CCRL2,CXCR4,ACKR2
GO:MF	ion transmembrane transporter activity	GO:0015075	0.0118729	1.92544	812	1386	85	20802	TRPM2,CD36,HVCN1,ATP1A3,CACNA1S,SLC11A1,COX6A2,AA467197,SLC37A2,SLC16A3,KCNE3,SLCO4A1,CACNG8,KCND1,CYBB,SCN8A,SLC46A1,HCN1,KCNK10,GABRB3,KCNK13,SCN11A,SLC39A14,KCNK2,S100A6,SLC13A3,KCNK6,CACNG5,SCN1B,PTK2B,KCNIP1,KCNAB2,KCNG2,SLC9A9,SLC38A6,SLC41A2,NALCN,HRH1,GRIK3,GRIA2,CLCA3A1,CACNG4,SLC38A1,ORAI2,MARCKSL1,GRIK4,SLC2A3,P2RX7,TRPV2,KCNQ2,SLC24A1,CHRNA4,SLC41A3,KCNMB4,SLC8A1,PIEZO2,SLC37A1,SLC1A5…
GO:MF	kinase activity	GO:0016301	0.012389	1.90696	777	1386	82	20802	DYRK4,HK3,BTK,HCK,SLA,MAP3K19,CSF1R,FGR,CCL3,HK2,AK1,LRGUK,MATK,DUSP9,PIK3R5,TTBK1,PAK3,DGKI,FLT3,STK32A,PFKFB4,PIK3CD,PRKG2,WNK3,CDKL1,ERBB3,PLAU,IKBKE,SYK,PTK2B,RNASEL,PIK3CG,CCL5,NME4,CAMK2A,PDGFRA,AXL,CAMK2B,CDK18,LMTK3,CDK5R1,CAMKK1,TGFBR1,ACVR1B,PRKCD,NTRK3,EPHB2,BMP2K,XYLB,CCNE1,RIPK3,CAMK1D,PAK1,TK1,MAP4K1,RPS6KA1,TRIB3,PGK1,TNIK,MAP3K14,PLK1,FAM20C,KIT,MPP6,TAOK3,PRPS2,LYN,VRK2,CERK,GALK…
GO:MF	microtubule binding	GO:0008017	0.0131625	1.88066	260	1386	36	20802	CCDC88B,FMN1,CAPN6,NAV3,KIF5A,KIF21B,DCX,FSD1,RGS14,KIF5C,CLIP4,DNM1,KIF2C,GAPDH,GTSE1,MAPT,KIFC5B,JAKMIP2,FMN2,CLIP2,HOOK2,TRIM46,PSRC1,PLK1,KIF18B,DPYSL5,CENPE,CLIP3,KNSTRN,SPAG5,KIFC1,KIF4,APC2,MAP1S,KIF14,KIF22
GO:MF	inorganic cation transmembrane transporter activity	GO:0022890	0.0132383	1.87817	567	1386	64	20802	TRPM2,HVCN1,ATP1A3,CACNA1S,SLC11A1,COX6A2,AA467197,KCNE3,CACNG8,KCND1,SCN8A,SLC46A1,HCN1,KCNK10,KCNK13,SCN11A,SLC39A14,KCNK2,SLC13A3,KCNK6,CACNG5,SCN1B,PTK2B,KCNIP1,KCNAB2,KCNG2,SLC9A9,SLC41A2,NALCN,HRH1,GRIK3,CACNG4,SLC38A1,ORAI2,MARCKSL1,GRIK4,P2RX7,TRPV2,KCNQ2,SLC24A1,CHRNA4,KCNMB4,SLC8A1,PIEZO2,RASA3,ATP13A2,KCNQ4,TRPC4,KCNIP3,SLC15A4,P2RX4,PANX1,KCNJ2,KCNN4,GRIA4,KCNA6,SLC39A4,SLC12A9,SLC39A…
GO:MF	phosphotyrosine residue binding	GO:0001784	0.0143653	1.84269	45	1386	12	20802	VAV1,HCK,PTPN6,FGR,SH3BP2,PTPN5,SYK,SOCS3,PLCG2,VAV2,SAMSN1,PFN1
GO:MF	potassium ion transmembrane transporter activity	GO:0015079	0.014502	1.83857	153	1386	25	20802	ATP1A3,KCNE3,KCND1,HCN1,KCNK10,KCNK13,KCNK2,KCNK6,KCNIP1,KCNAB2,KCNG2,SLC9A9,GRIK3,GRIK4,KCNQ2,SLC24A1,KCNMB4,KCNQ4,KCNIP3,KCNJ2,KCNN4,KCNA6,SLC12A9,GRIK5,KCNJ15
GO:MF	protein tyrosine phosphatase activity	GO:0004725	0.0157003	1.80409	100	1386	19	20802	PTPN7,PTPN6,PTPRN,EYA4,PTPRC,DUSP9,PTPRN2,DUSP26,PTPN5,PTPRO,PTPRZ1,UBASH3B,PTPN18,PTPRE,CDC25C,DUSP2,PTPN1,PTPRJ,SSH2
GO:MF	amyloid-beta binding	GO:0001540	0.0163082	1.7876	60	1386	14	20802	PIRB,CD36,TREM2,ATP1A3,CD74,TLR2,GSAP,APBA2,APOE,EPHB2,SORL1,DLGAP3,OLFM1,ITM2C
GO:MF	gated channel activity	GO:0022836	0.0168676	1.77295	326	1386	42	20802	TRPM2,HVCN1,CACNA1S,KCNE3,CACNG8,KCND1,CYBB,SCN8A,HCN1,GABRB3,KCNK13,SCN11A,KCNK2,CACNG5,SCN1B,PTK2B,KCNIP1,KCNAB2,KCNG2,GRIK3,GRIA2,CLCA3A1,CACNG4,MARCKSL1,GRIK4,P2RX7,KCNQ2,CHRNA4,KCNMB4,PIEZO2,RASA3,KCNQ4,KCNIP3,P2RX4,KCNJ2,KCNN4,GRIA4,KCNA6,TPCN2,GRIK5,ANXA6,KCNJ15
GO:MF	potassium channel activity	GO:0005267	0.0171192	1.76652	118	1386	21	20802	KCNE3,KCND1,HCN1,KCNK10,KCNK13,KCNK2,KCNK6,KCNIP1,KCNAB2,KCNG2,GRIK3,GRIK4,KCNQ2,KCNMB4,KCNQ4,KCNIP3,KCNJ2,KCNN4,KCNA6,GRIK5,KCNJ15
GO:MF	chemokine activity	GO:0008009	0.0182653	1.73837	46	1386	12	20802	CCL4,CCL12,2610528A11RIK,CCL3,CCL6,CCL2,CCL11,CCL9,CXCL16,CCL5,CXCL14,CKLF
GO:MF	hydrolase activity, acting on glycosyl bonds	GO:0016798	0.0217658	1.66222	138	1386	23	20802	HPSE,TLR13,HEXB,IL1RL2,TLR12,LYZ2,TLR1,MAN2B1,GM2A,DNPH1,EDEM1,TLR4,HEXA,PSAP,GUSB,ACER3,UNG,NEU1,EDEM2,MAN2B2,TLR6,GBA,MOGS
GO:MF	ion channel activity	GO:0005216	0.0230944	1.63649	418	1386	50	20802	TRPM2,HVCN1,CACNA1S,KCNE3,CACNG8,KCND1,SCN8A,HCN1,KCNK10,GABRB3,KCNK13,SCN11A,KCNK2,KCNK6,CACNG5,SCN1B,PTK2B,KCNIP1,KCNAB2,KCNG2,NALCN,GRIK3,GRIA2,CLCA3A1,CACNG4,ORAI2,MARCKSL1,GRIK4,P2RX7,TRPV2,KCNQ2,SLC24A1,CHRNA4,KCNMB4,PIEZO2,RASA3,KCNQ4,TRPC4,KCNIP3,P2RX4,PANX1,KCNJ2,KCNN4,GRIA4,KCNA6,TPCN2,GRIK5,ANXA6,KCNJ15,LRRC8D
GO:MF	actin filament binding	GO:0051015	0.0235983	1.62712	206	1386	30	20802	AIF1,CORO1A,MYO1G,FMNL1,HCLS1,ACTR3B,COTL1,MYO7A,MYO16,MYO5A,ADD2,ESPN,ABI3,MARCKSL1,BIN1,MARCKS,CDK5R1,LCP1,PPP1R9A,ADSSL1,DBN1,ABLIM3,CTNNA2,PANX1,SAMD14,CAPG,IQGAP3,MAP1S,ANXA6,FSCN1
GO:MF	transmembrane transporter activity	GO:0022857	0.027639	1.55848	1053	1386	103	20802	ABCC3,TRPM2,SLC2A5,CD36,SPNS3,HVCN1,ATP1A3,CACNA1S,SLC11A1,COX6A2,AA467197,SLC37A2,SLC16A3,KCNE3,SLCO4A1,SLC7A14,SV2C,CACNG8,KCND1,ABCD2,CYBB,SCN8A,SLC46A1,HCN1,KCNK10,GABRB3,KCNK13,SCN11A,SLC7A7,SLC39A14,SLC16A10,SLC2A6,KCNK2,SLC15A3,S100A6,SLC13A3,KCNK6,CACNG5,ABCB1B,SCN1B,PTK2B,KCNIP1,KCNAB2,KCNG2,SLC9A9,SLC38A6,SLC41A2,NALCN,HRH1,GRIK3,GRIA2,CLCA3A1,SLC16A6,CACNG4,SLC38A1,ORAI2,MARCKSL1,SLC29…
GO:MF	MHC protein complex binding	GO:0023023	0.0303112	1.5184	12	1386	6	20802	H2-OA,H2-OB,CD8A,H2-DMB2,CD74,H2-DMA
GO:MF	SH3 domain binding	GO:0017124	0.0322779	1.49109	123	1386	21	20802	NCF1,PTPN6,WAS,FMN1,SH3BP1,SIRPA,PAK3,HCLS1,ESPN,ABI3,ADAM19,INPP5D,DNM1,SH3KBP1,EFS,MAPT,DTX1,CYBA,WIPF1,LYN,GRIK5
GO:MF	protein phosphorylated amino acid binding	GO:0045309	0.0486064	1.31331	58	1386	13	20802	VAV1,HCK,PTPN6,FGR,SIRPA,SH3BP2,PTPN5,SYK,SOCS3,PLCG2,VAV2,SAMSN1,PFN1
GO:BP	immune system process	GO:0002376	6.5448e-35	34.1841	2807	1395	359	21118	CD244,IL13RA2,IL1B,SLAMF6,CST7,LILRB4A,GPR35,NLRP3,ITGAD,TSPAN32,IL1RN,CLEC7A,MILR1,HCAR2,SCIMP,ITGAX,TRPM2,PIRB,5430427O19RIK,CD84,CD300LF,BCL2A1A,H2-OA,BTNL2,CTSS,LAG3,SPP1,DNASE1L3,DOCK2,FCGR1,HAVCR2,PRAM1,CLEC2I,RAC2,CD36,C3,IL1A,VAV1,CCDC88B,BTK,C3AR1,ARL11,RUNX3,CLEC5A,C1QC,CCL4,TREM2,TLR7,H2-OB,CD68,LAT2,OSM,LY86,NCF1,TNFRSF13B,TNFAIP8L2,FCGR4,HCK,SLA,CD86,AIF1,FYB,NCKAP1L,ADGRE1,CD200R1,C…
GO:BP	regulation of biological quality	GO:0065008	5.28681e-34	33.2768	3876	1395	447	21118	IL1B,APOB,LILRB4A,MLXIPL,HPSE,GPR35,TSPAN32,IL1RN,TIFAB,PKIB,TBXAS1,HCAR2,HK3,TRPM2,PIRB,5430427O19RIK,BCL2A1A,HAAO,SLC2A5,CTSS,SPP1,CSN2,HRH2,CLEC2I,RAC2,CD36,C3,IL1A,VAV1,BTK,C3AR1,CCL4,TREM2,CAPN3,OSM,HVCN1,RAB39,TNFRSF13B,F9,FCGR4,HCK,F2RL2,AFP,ATP1A3,NCKAP1L,C5AR1,UGT1A7C,CCL12,GNA15,CCR1,CSN3,CX3CR1,TNFSF13B,P2RY6,SLC11A1,CCR5,SPI1,GNG3,PTPN6,TNF,C5AR2,FCER1G,PTAFR,ARHGAP4,PLEK,CNR2,CYP4F18…
GO:BP	cell activation	GO:0001775	1.01309e-33	32.9944	1115	1395	194	21118	CD244,IL13RA2,IL1B,SLAMF6,CST7,LILRB4A,NLRP3,ITGAD,TSPAN32,CLEC7A,MILR1,PIRB,CD84,CD300LF,H2-OA,BTNL2,LAG3,DNASE1L3,DOCK2,HAVCR2,PRAM1,CLEC2I,RAC2,IL1A,VAV1,CCDC88B,BTK,RUNX3,TREM2,CAPN3,LAT2,TNFRSF13B,TNFAIP8L2,FCGR4,CD86,AIF1,NCKAP1L,C5AR1,BCL2A1D,WDFY4,C1QA,LY9,ITGB2,BANK1,APBB1IP,CX3CR1,LGALS3,TNFSF13B,SLC11A1,CD48,TREML2,CD180,THEMIS2,SPI1,BLNK,PTPN6,TNF,TNFSF14,FCER1G,PTAFR,PLEK,CNR2,CD37,C…
GO:BP	positive regulation of biological process	GO:0048518	6.54181e-32	31.1843	6305	1395	628	21118	CD244,IL13RA2,IL1B,SLAMF6,APOB,CST7,LILRB4A,MLXIPL,HPSE,GPR35,NLRP3,IL1RN,CLEC7A,PKIB,TBXAS1,HCAR2,SCIMP,ITGAX,TRPM2,PIRB,5430427O19RIK,CD84,CD300LF,BTNL2,CTSS,LAG3,SPP1,DOCK2,FCGR1,MGARP,HAVCR2,HRH2,PRAM1,CLEC2I,RAC2,CD36,PIK3AP1,EGLN3,C3,IL1A,VAV1,CCDC88B,BTK,C3AR1,RUNX3,CLEC5A,C1QC,CCL4,TREM2,TLR7,CAPN3,LAT2,OSM,HVCN1,LY86,NCF1,FCGR4,HCK,CD86,AIF1,F2RL2,FYB,NCKAP1L,C5AR1,BCL2A1D,FGD2,C1QA,LY9,…
GO:BP	regulation of response to stimulus	GO:0048583	6.53795e-31	30.1846	3851	1395	436	21118	IL13RA2,IL1B,SLAMF6,CST7,LILRB4A,HPSE,GPR35,NLRP3,TSPAN32,IL1RN,CLEC7A,SCIMP,HK3,TRPM2,5430427O19RIK,CD84,CD300LF,BTNL2,CTSS,LAG3,DNASE1L3,DOCK2,FCGR1,HAVCR2,PRAM1,CLEC2I,RAC2,CD36,PIK3AP1,C3,IL1A,VAV1,BTK,C3AR1,RUNX3,C1QC,CCL4,TREM2,TLR7,CAPN3,LAT2,OSM,LY86,NCF1,TNFAIP8L2,FCGR4,SLA,CD86,AIF1,F2RL2,FYB,NCKAP1L,CD200R1,C5AR1,BCL2A1D,FGD2,C1QA,CCL12,C1QB,CCR1,ADCY7,BANK1,CX3CR1,LGALS3,TNFSF13B,P2RY…
GO:BP	regulation of multicellular organismal process	GO:0051239	1.33165e-30	29.8756	2788	1395	346	21118	CD244,IL1B,SLAMF6,CST7,HPSE,GPR35,NLRP3,CLEC7A,TIFAB,TBXAS1,HCAR2,SCIMP,ITGAX,CD84,H2-OA,BTNL2,CTSS,LAG3,SPP1,HAVCR2,HRH2,CLEC2I,CD36,C3,IL1A,CCDC88B,BTK,C3AR1,RUNX3,CLEC5A,C1QC,CCL4,TREM2,TLR7,CAPN3,OSM,TNFRSF9,FCGR4,CD86,AIF1,NCKAP1L,CD200R1,C5AR1,LY9,CCR1,ADCY7,ITGB2,HPGDS,BANK1,CX3CR1,SLC11A1,PLD4,CCR5,SPI1,CSF3R,PTPN6,TNF,C5AR2,FCER1G,PTAFR,ARHGAP4,RXRG,CELA1,CXCR2,TYROBP,CARD9,APOC1,SASH3,C…
GO:BP	leukocyte activation	GO:0045321	1.44762e-30	29.8393	996	1395	175	21118	CD244,IL13RA2,IL1B,SLAMF6,CST7,LILRB4A,NLRP3,ITGAD,TSPAN32,CLEC7A,MILR1,PIRB,CD84,CD300LF,H2-OA,BTNL2,LAG3,DNASE1L3,DOCK2,HAVCR2,PRAM1,CLEC2I,RAC2,IL1A,VAV1,CCDC88B,BTK,RUNX3,TREM2,LAT2,TNFRSF13B,TNFAIP8L2,FCGR4,CD86,AIF1,NCKAP1L,C5AR1,BCL2A1D,WDFY4,C1QA,LY9,ITGB2,BANK1,APBB1IP,CX3CR1,LGALS3,TNFSF13B,SLC11A1,CD48,TREML2,CD180,THEMIS2,SPI1,BLNK,PTPN6,TNF,TNFSF14,FCER1G,PTAFR,CNR2,CD37,CORO1A,RASAL…
GO:BP	regulation of immune system process	GO:0002682	2.44865e-28	27.6111	1406	1395	213	21118	CD244,IL13RA2,IL1B,SLAMF6,CST7,LILRB4A,NLRP3,TSPAN32,CLEC7A,MILR1,HCAR2,SCIMP,5430427O19RIK,CD84,CD300LF,H2-OA,BTNL2,LAG3,DNASE1L3,FCGR1,HAVCR2,PRAM1,CLEC2I,RAC2,CD36,C3,IL1A,VAV1,CCDC88B,BTK,C3AR1,RUNX3,C1QC,CCL4,TREM2,H2-OB,CD68,LAT2,TNFRSF13B,TNFAIP8L2,FCGR4,CD86,AIF1,FYB,NCKAP1L,CD200R1,C5AR1,BCL2A1D,C1QA,CCL12,C1QB,CCR1,ADCY7,BANK1,CX3CR1,LGALS3,TNFSF13B,SLC11A1,CD48,THEMIS2,SPI1,CSF3R,BLNK,…
GO:BP	localization	GO:0051179	2.54411e-28	27.5945	6168	1395	606	21118	IL13RA2,IL1B,ABCC3,APOB,GPR35,NLRP3,TSPAN32,IL1RN,CLEC7A,TIFAB,MILR1,SIGLECF,HCAR2,ITGAX,TRPM2,CD84,CD300LF,SLC2A5,CTSS,SAA3,SPP1,DOCK2,CSN2,FCGR1,MGARP,ADORA3,HRH2,PRAM1,CLEC2I,RAC2,CD36,C3,IL1A,VAV1,CCDC88B,SPNS3,NCF4,BTK,C3AR1,ARL11,CCL4,TREM2,CAPN3,CD68,LAT2,OSM,HVCN1,STRA6L,RAB39,NCF1,STAG3,BIN2,HCK,AIF1,ATP1A3,FYB,NCKAP1L,CD200R1,C5AR1,TREM1,CCL12,CCR1,CSN3,ITGB2,CX3CR1,LGALS3,P2RY6,CACNA1S…
GO:BP	system development	GO:0048731	2.01839e-27	26.695	4876	1395	506	21118	IL1B,SLAMF6,APOB,CST7,HPSE,NLRP3,CRYBA4,TIFAB,ITGAX,TRPM2,PIRB,CD300LF,H2-OA,LAG3,SPP1,DOCK2,CSN2,HAVCR2,HRH2,CLEC2I,RAC2,CD36,C3,IL1A,VAV1,BTK,C3AR1,ARL11,RUNX3,CLEC5A,C1QC,TREM2,CAPN3,OSM,TNFRSF13B,CD86,AIF1,AFP,ATP1A3,NCKAP1L,C5AR1,BCL2A1D,C1QA,LY9,CCL12,C1QB,CCR1,CSN3,ITGB2,CX3CR1,TNFSF13B,PLD4,CCR5,SPI1,CSF3R,PTPN6,TNF,FCER1G,ARHGAP4,PLEK,EMX2,RXRG,IKZF1,CELA1,CXCR2,TYROBP,LST1,SASH3,CSF1R,R…
GO:BP	regulation of localization	GO:0032879	4.69528e-27	26.3283	2868	1395	343	21118	IL13RA2,IL1B,APOB,GPR35,IL1RN,CLEC7A,TIFAB,SIGLECF,HCAR2,ITGAX,TRPM2,CD84,CD300LF,CTSS,SPP1,DOCK2,FCGR1,ADORA3,HRH2,PRAM1,RAC2,CD36,C3,IL1A,C3AR1,CCL4,TREM2,CAPN3,OSM,HVCN1,HCK,AIF1,NCKAP1L,CD200R1,C5AR1,CCL12,CCR1,CX3CR1,LGALS3,P2RY6,CACNA1S,SLC11A1,CCR5,SPI1,PTPN6,TNF,TNFSF14,C5AR2,FCER1G,PTAFR,ARHGAP4,2610528A11RIK,CYP4F18,CORO1A,WAS,CXCR2,TYROBP,APOC1,CD300A,CSF1R,RELN,P2RY12,GPNMB,TFAP2B,KCN…
GO:BP	immune response	GO:0006955	1.52731e-26	25.8161	1857	1395	252	21118	CD244,IL13RA2,IL1B,SLAMF6,CST7,LILRB4A,NLRP3,TSPAN32,IL1RN,CLEC7A,MILR1,SCIMP,ITGAX,PIRB,5430427O19RIK,CD84,H2-OA,BTNL2,CTSS,LAG3,DNASE1L3,DOCK2,FCGR1,HAVCR2,PRAM1,CLEC2I,RAC2,CD36,C3,IL1A,VAV1,CCDC88B,BTK,C3AR1,CLEC5A,C1QC,CCL4,TREM2,TLR7,H2-OB,CD68,LAT2,OSM,LY86,NCF1,TNFRSF13B,TNFAIP8L2,FCGR4,HCK,SLA,CD86,AIF1,FYB,NCKAP1L,ADGRE1,C5AR1,TREM1,BCL2A1D,C1QA,LY9,CCL12,C1QB,CCR1,ADCY7,APBB1IP,CX3CR1,…
GO:BP	cell migration	GO:0016477	1.99125e-26	25.7009	1491	1395	217	21118	IL1B,GPR35,NLRP3,IL1RN,CLEC7A,ITGAX,TRPM2,SAA3,SPP1,ADORA3,RAC2,IL1A,VAV1,C3AR1,CCL4,TREM2,BIN2,AIF1,NCKAP1L,CD200R1,C5AR1,TREM1,CCL12,CCR1,ITGB2,CX3CR1,LGALS3,P2RY6,CCR5,SPI1,CSF3R,TNF,TNFSF14,C5AR2,FCER1G,PTAFR,ARHGAP4,CNR2,EMX2,2610528A11RIK,CORO1A,CXCR2,ITGAL,CD300A,CSF1R,RELN,P2RY12,GPNMB,FGR,MYO1G,RHOH,CCL3,FERMT3,CCR6,SH3BP1,CCL6,LPXN,HEXB,ALOX5,CCL2,PTPRC,NFATC2,FMNL1,NAV3,IL16,SLAMF1,SIR…
GO:BP	positive regulation of cellular process	GO:0048522	7.58623e-26	25.12	5796	1395	570	21118	CD244,IL1B,SLAMF6,APOB,CST7,MLXIPL,HPSE,GPR35,NLRP3,IL1RN,CLEC7A,PKIB,HCAR2,SCIMP,ITGAX,TRPM2,PIRB,5430427O19RIK,CD300LF,BTNL2,CTSS,LAG3,SPP1,DOCK2,FCGR1,MGARP,HAVCR2,CLEC2I,RAC2,CD36,PIK3AP1,EGLN3,C3,IL1A,VAV1,CCDC88B,C3AR1,RUNX3,CCL4,TREM2,TLR7,CAPN3,OSM,HVCN1,LY86,NCF1,HCK,CD86,AIF1,F2RL2,NCKAP1L,C5AR1,FGD2,C1QA,CCL12,CCR1,ITGB2,BANK1,APBB1IP,CX3CR1,LGALS3,TNFSF13B,P2RY6,SLC11A1,UNC5CL,CCR5,CD…
GO:BP	locomotion	GO:0040011	3.16154e-25	24.5001	1839	1395	247	21118	IL1B,APOB,GPR35,NLRP3,IL1RN,CLEC7A,ITGAX,TRPM2,SAA3,SPP1,DOCK2,ADORA3,RAC2,IL1A,VAV1,C3AR1,RUNX3,CCL4,TREM2,BIN2,AIF1,NCKAP1L,CD200R1,C5AR1,TREM1,CCL12,CCR1,ITGB2,CX3CR1,LGALS3,P2RY6,CCR5,SPI1,CSF3R,TNF,TNFSF14,C5AR2,FCER1G,PTAFR,ARHGAP4,CNR2,EMX2,2610528A11RIK,CORO1A,WAS,CXCR2,ITGAL,CD300A,CSF1R,RELN,P2RY12,GPNMB,FGR,MYO1G,GAP43,NEURL1A,RHOH,CCL3,FERMT3,CELF3,CCR6,SH3BP1,CCL6,LPXN,HEXB,ALOX5,CCL…
GO:BP	response to external stimulus	GO:0009605	4.29052e-25	24.3675	2912	1395	341	21118	CD244,IL1B,SLAMF6,APOB,CST7,LILRB4A,HPSE,GPR35,NLRP3,TSPAN32,CLEC7A,TIFAB,SCIMP,ITGAX,TRPM2,5430427O19RIK,CTSS,LAG3,SAA3,SPP1,DNASE1L3,DOCK2,FCGR1,HAVCR2,RAC2,CD36,PIK3AP1,C3,IL1A,VAV1,CCDC88B,BTK,C3AR1,RUNX3,CLEC5A,C1QC,CCL4,TREM2,TLR7,CAPN3,CD68,OSM,LY86,NCF1,TNFAIP8L2,FCGR4,BIN2,HCK,SLA,CD86,AIF1,NCKAP1L,CD200R1,C5AR1,TREM1,WDFY4,C1QA,LY9,CCL12,C1QB,CCR1,BANK1,CX3CR1,LGALS3,SLC11A1,PLD4,TLR13,…
GO:BP	movement of cell or subcellular component	GO:0006928	5.0018e-25	24.3009	2075	1395	268	21118	IL1B,APOB,GPR35,NLRP3,IL1RN,CLEC7A,ITGAX,TRPM2,SAA3,SPP1,MGARP,ADORA3,RAC2,IL1A,VAV1,C3AR1,RUNX3,CCL4,TREM2,BIN2,AIF1,NCKAP1L,CD200R1,C5AR1,TREM1,CCL12,CCR1,ITGB2,CX3CR1,LGALS3,P2RY6,CCR5,SPI1,CSF3R,TNF,TNFSF14,C5AR2,FCER1G,PTAFR,ARHGAP4,CNR2,EMX2,2610528A11RIK,CORO1A,WAS,CXCR2,ITGAL,CD300A,CSF1R,RELN,P2RY12,GPNMB,KCNE3,FGR,MYO1G,GAP43,NEURL1A,RHOH,CCL3,FERMT3,CELF3,CCR6,SH3BP1,CCL6,LPXN,HEXB,CNI…
GO:BP	inflammatory response	GO:0006954	2.10324e-24	23.6771	732	1395	134	21118	IL1B,CST7,LILRB4A,NLRP3,IL1RN,CLEC7A,CTSS,SAA3,DNASE1L3,FCGR1,HAVCR2,PIK3AP1,C3,IL1A,BTK,C3AR1,CCL4,TREM2,TLR7,CD68,OSM,LY86,NCF1,TNFAIP8L2,HCK,AIF1,CD200R1,C5AR1,TREM1,CCL12,CCR1,ADCY7,ITGB2,CX3CR1,SLC11A1,PLD4,TLR13,CCR5,CD180,THEMIS2,TNF,C5AR2,FCER1G,PTAFR,CNR2,CELA1,ALOX5AP,CXCR2,CD300A,CSF1R,PTGS1,ALOX15,TICAM2,CCL3,CCR6,CCL6,IL1RL2,ALOX5,CCL2,NLRP1B,TLR12,CYBB,TLR9,IL16,SLAMF1,SIRPA,TTBK1,N…
GO:BP	positive regulation of response to stimulus	GO:0048584	2.72307e-24	23.5649	2198	1395	277	21118	IL1B,SLAMF6,HPSE,GPR35,NLRP3,IL1RN,CLEC7A,SCIMP,5430427O19RIK,CD300LF,BTNL2,CTSS,LAG3,DOCK2,FCGR1,HAVCR2,PRAM1,CLEC2I,RAC2,CD36,PIK3AP1,C3,IL1A,VAV1,BTK,C3AR1,RUNX3,C1QC,CCL4,TREM2,TLR7,LAT2,OSM,LY86,NCF1,CD86,AIF1,F2RL2,FYB,NCKAP1L,C5AR1,BCL2A1D,FGD2,C1QA,CCL12,C1QB,CCR1,BANK1,CX3CR1,TNFSF13B,P2RY6,SLC11A1,UNC5CL,CCR5,CD180,THEMIS2,SPI1,BLNK,PTPN6,TNF,TNFSF14,C5AR2,FCER1G,PTAFR,ALOX5AP,WAS,CXCR2…
GO:BP	leukocyte migration	GO:0050900	4.3432e-24	23.3622	361	1395	88	21118	IL1B,GPR35,NLRP3,TRPM2,SPP1,RAC2,IL1A,VAV1,C3AR1,CCL4,TREM2,AIF1,NCKAP1L,CD200R1,C5AR1,TREM1,CCL12,CCR1,ITGB2,CX3CR1,LGALS3,SPI1,CSF3R,TNF,TNFSF14,C5AR2,FCER1G,PTAFR,CNR2,2610528A11RIK,CORO1A,CXCR2,ITGAL,CD300A,CSF1R,P2RY12,MYO1G,RHOH,CCL3,CCR6,CCL6,ALOX5,CCL2,IL16,SLAMF1,SIRPA,LGMN,DOCK8,GCNT1,PYCARD,CD74,GPR18,CCL11,CCL9,ITGB3,CXCL16,SYK,PTK2B,ADD2,ADORA1,CCL5,HRH1,PTPRO,CHGA,IL17RA,PGF,CMKLR1,…
GO:BP	positive regulation of multicellular organismal process	GO:0051240	7.26983e-24	23.1385	1555	1395	217	21118	CD244,IL1B,SLAMF6,CST7,HPSE,NLRP3,CLEC7A,TBXAS1,HCAR2,SCIMP,ITGAX,BTNL2,HAVCR2,HRH2,CD36,C3,IL1A,CCDC88B,C3AR1,RUNX3,CLEC5A,CCL4,TREM2,TLR7,OSM,AIF1,NCKAP1L,C5AR1,LY9,CCR1,ITGB2,CX3CR1,SLC11A1,CCR5,TNF,FCER1G,PTAFR,CELA1,CXCR2,TYROBP,CARD9,SASH3,CSF1R,RELN,SLITRK4,FGR,PTGS1,TMEM119,FBN2,NEURL1A,TICAM2,RHOH,CCL3,CHRM3,DCSTAMP,POU2F2,IL1RL2,ALOX5,CCL2,HMGA2,PTPRC,LAPTM5,HK2,OAS3,IRF8,CARD11,H2-AA,S…
GO:BP	localization of cell	GO:0051674	2.25277e-23	22.6473	1653	1395	225	21118	IL1B,APOB,GPR35,NLRP3,IL1RN,CLEC7A,ITGAX,TRPM2,SAA3,SPP1,ADORA3,RAC2,IL1A,VAV1,C3AR1,CCL4,TREM2,BIN2,AIF1,NCKAP1L,CD200R1,C5AR1,TREM1,CCL12,CCR1,ITGB2,CX3CR1,LGALS3,P2RY6,CCR5,SPI1,CSF3R,TNF,TNFSF14,C5AR2,FCER1G,PTAFR,ARHGAP4,CNR2,EMX2,2610528A11RIK,CORO1A,WAS,CXCR2,ITGAL,CD300A,CSF1R,RELN,P2RY12,GPNMB,FGR,MYO1G,NEURL1A,RHOH,CCL3,FERMT3,CELF3,CCR6,SH3BP1,CCL6,LPXN,HEXB,ALOX5,CCL2,PTPRC,NFATC2,FMN…
GO:BP	cell motility	GO:0048870	2.25277e-23	22.6473	1653	1395	225	21118	IL1B,APOB,GPR35,NLRP3,IL1RN,CLEC7A,ITGAX,TRPM2,SAA3,SPP1,ADORA3,RAC2,IL1A,VAV1,C3AR1,CCL4,TREM2,BIN2,AIF1,NCKAP1L,CD200R1,C5AR1,TREM1,CCL12,CCR1,ITGB2,CX3CR1,LGALS3,P2RY6,CCR5,SPI1,CSF3R,TNF,TNFSF14,C5AR2,FCER1G,PTAFR,ARHGAP4,CNR2,EMX2,2610528A11RIK,CORO1A,WAS,CXCR2,ITGAL,CD300A,CSF1R,RELN,P2RY12,GPNMB,FGR,MYO1G,NEURL1A,RHOH,CCL3,FERMT3,CELF3,CCR6,SH3BP1,CCL6,LPXN,HEXB,ALOX5,CCL2,PTPRC,NFATC2,FMN…
GO:BP	chemotaxis	GO:0006935	7.38122e-23	22.1319	600	1395	116	21118	IL1B,GPR35,TRPM2,SAA3,SPP1,DOCK2,RAC2,VAV1,C3AR1,RUNX3,CCL4,TREM2,BIN2,AIF1,NCKAP1L,C5AR1,TREM1,CCL12,CCR1,CX3CR1,LGALS3,CCR5,SPI1,CSF3R,TNFSF14,C5AR2,FCER1G,PTAFR,CNR2,2610528A11RIK,CORO1A,CXCR2,CSF1R,RELN,P2RY12,GAP43,RHOH,CCL3,CCR6,CCL6,ALOX5,CCL2,IL16,KIF5A,SLAMF1,LGMN,TUBB3,PIK3CD,CD74,GPR18,CCL11,CCL9,CNTN4,ARRB2,ITGB3,CXCL16,CRMP1,DCC,LSP1,DSCAM,ETV4,BCL11B,ANGPT2,SCN1B,SYK,PTK2B,PIK3CG,WN…
GO:BP	intracellular signal transduction	GO:0035556	1.10679e-22	21.9559	2491	1395	298	21118	IL1B,HPSE,GPR35,NLRP3,IL1RN,CLEC7A,TIFAB,BCL2A1B,SCIMP,TRPM2,BCL2A1A,SAA3,DOCK2,HAVCR2,RAC2,CD36,PIK3AP1,C3,IL1A,VAV1,BTK,CCL4,TREM2,TLR7,CAPN3,LAT2,OSM,RAB39,NCF1,CD86,AIF1,F2RL2,C5AR1,BCL2A1D,FGD2,CCL12,CCR1,ADCY7,BANK1,CX3CR1,P2RY6,SLC11A1,UNC5CL,TLR13,CCR5,SPI1,BLNK,PTPN6,TNF,TNFSF14,C5AR2,PTAFR,PLEK,RASAL3,WAS,CXCR2,ITGAL,CARD9,CD300A,PSD4,PLCB2,CSF1R,RELN,P2RY12,GPNMB,FGR,ALOX15,TICAM2,CD8A…
GO:BP	multicellular organism development	GO:0007275	1.28208e-22	21.8921	5441	1395	532	21118	IL1B,SLAMF6,APOB,CST7,HPSE,NLRP3,IL1RN,CRYBA4,TIFAB,ITGAX,TRPM2,PIRB,CD300LF,H2-OA,LAG3,SPP1,DOCK2,CSN2,HAVCR2,HRH2,CLEC2I,RAC2,CD36,C3,IL1A,VAV1,BTK,C3AR1,ARL11,RUNX3,CLEC5A,C1QC,TREM2,CAPN3,OSM,TNFRSF13B,CD86,AIF1,AFP,ATP1A3,NCKAP1L,C5AR1,BCL2A1D,C1QA,LY9,CCL12,C1QB,CCR1,CSN3,ITGB2,CX3CR1,TNFSF13B,PLD4,CCR5,SPI1,CSF3R,PTPN6,TNF,FCER1G,ARHGAP4,PLEK,EMX2,RXRG,IKZF1,CELA1,CXCR2,TYROBP,LST1,SASH3,C…
GO:BP	taxis	GO:0042330	1.56324e-22	21.806	605	1395	116	21118	IL1B,GPR35,TRPM2,SAA3,SPP1,DOCK2,RAC2,VAV1,C3AR1,RUNX3,CCL4,TREM2,BIN2,AIF1,NCKAP1L,C5AR1,TREM1,CCL12,CCR1,CX3CR1,LGALS3,CCR5,SPI1,CSF3R,TNFSF14,C5AR2,FCER1G,PTAFR,CNR2,2610528A11RIK,CORO1A,CXCR2,CSF1R,RELN,P2RY12,GAP43,RHOH,CCL3,CCR6,CCL6,ALOX5,CCL2,IL16,KIF5A,SLAMF1,LGMN,TUBB3,PIK3CD,CD74,GPR18,CCL11,CCL9,CNTN4,ARRB2,ITGB3,CXCL16,CRMP1,DCC,LSP1,DSCAM,ETV4,BCL11B,ANGPT2,SCN1B,SYK,PTK2B,PIK3CG,WN…
GO:BP	developmental process	GO:0032502	2.60462e-22	21.5843	6536	1395	611	21118	IL1B,SLAMF6,APOB,CST7,HPSE,NLRP3,IL1RN,CRYBA4,CLEC7A,TIFAB,ITGAX,TRPM2,PIRB,CD300LF,H2-OA,DMRTB1,LAG3,SPP1,DNASE1L3,DOCK2,CSN2,HAVCR2,HRH2,CLEC2I,RAC2,CD36,C3,IL1A,VAV1,BTK,C3AR1,ARL11,RUNX3,CLEC5A,C1QC,TREM2,CAPN3,CD68,OSM,TNFRSF13B,HCK,SLA,CD86,AIF1,AFP,ATP1A3,NCKAP1L,C5AR1,BCL2A1D,C1QA,LY9,CCL12,C1QB,CCR1,CSN3,ITGB2,CX3CR1,LGALS3,TNFSF13B,PLD4,CCR5,SPI1,CSF3R,PTPN6,CD53,TNF,TNFSF14,FCER1G,ARHG…
GO:BP	cell differentiation	GO:0030154	2.84087e-22	21.5465	4378	1395	450	21118	IL1B,SLAMF6,APOB,NLRP3,CLEC7A,TRPM2,PIRB,CD300LF,H2-OA,DMRTB1,LAG3,SPP1,DNASE1L3,DOCK2,HRH2,CLEC2I,RAC2,CD36,C3,IL1A,VAV1,BTK,ARL11,RUNX3,CLEC5A,C1QC,TREM2,CAPN3,TNFRSF13B,HCK,SLA,NCKAP1L,C5AR1,BCL2A1D,C1QA,LY9,CCL12,CCR1,CX3CR1,LGALS3,TNFSF13B,PLD4,CCR5,SPI1,CSF3R,PTPN6,CD53,TNF,TNFSF14,FCER1G,ARHGAP4,PLEK,EMX2,RXRG,IKZF1,CELA1,TYROBP,LST1,SASH3,CSF1R,RELN,SLITRK4,P2RY12,GPNMB,TFAP2B,AW551984,FG…
GO:BP	positive regulation of immune system process	GO:0002684	3.02873e-22	21.5187	947	1395	153	21118	CD244,IL13RA2,IL1B,SLAMF6,LILRB4A,NLRP3,CLEC7A,HCAR2,SCIMP,5430427O19RIK,CD84,BTNL2,LAG3,FCGR1,HAVCR2,PRAM1,CLEC2I,RAC2,CD36,C3,IL1A,VAV1,CCDC88B,BTK,C3AR1,RUNX3,C1QC,CCL4,TREM2,LAT2,CD86,AIF1,FYB,NCKAP1L,C5AR1,BCL2A1D,C1QA,CCL12,C1QB,CCR1,CX3CR1,LGALS3,TNFSF13B,SLC11A1,THEMIS2,SPI1,BLNK,PTPN6,TNF,TNFSF14,C5AR2,FCER1G,PTAFR,CD37,CORO1A,RASAL3,CXCR2,ITGAL,TYROBP,CARD9,CD300A,SASH3,CSF1R,P2RY12,ERM…
GO:BP	cellular developmental process	GO:0048869	5.03443e-22	21.298	4454	1395	455	21118	IL1B,SLAMF6,APOB,NLRP3,CLEC7A,TRPM2,PIRB,CD300LF,H2-OA,DMRTB1,LAG3,SPP1,DNASE1L3,DOCK2,HRH2,CLEC2I,RAC2,CD36,C3,IL1A,VAV1,BTK,ARL11,RUNX3,CLEC5A,C1QC,TREM2,CAPN3,TNFRSF13B,HCK,SLA,NCKAP1L,C5AR1,BCL2A1D,C1QA,LY9,CCL12,CCR1,CX3CR1,LGALS3,TNFSF13B,PLD4,CCR5,SPI1,CSF3R,PTPN6,CD53,TNF,TNFSF14,FCER1G,ARHGAP4,PLEK,EMX2,RXRG,IKZF1,CELA1,TYROBP,LST1,SASH3,CSF1R,RELN,SLITRK4,P2RY12,GPNMB,TFAP2B,AW551984,FG…
GO:BP	anatomical structure development	GO:0048856	5.2987e-22	21.2758	5987	1395	570	21118	IL1B,SLAMF6,APOB,CST7,HPSE,NLRP3,IL1RN,CRYBA4,CLEC7A,TIFAB,ITGAX,TRPM2,PIRB,CD300LF,H2-OA,DMRTB1,LAG3,SPP1,DNASE1L3,DOCK2,CSN2,HAVCR2,HRH2,CLEC2I,RAC2,CD36,C3,IL1A,VAV1,BTK,C3AR1,ARL11,RUNX3,CLEC5A,C1QC,TREM2,CAPN3,OSM,TNFRSF13B,HCK,CD86,AIF1,AFP,ATP1A3,NCKAP1L,C5AR1,BCL2A1D,C1QA,LY9,CCL12,C1QB,CCR1,CSN3,ITGB2,CX3CR1,LGALS3,TNFSF13B,PLD4,CCR5,SPI1,CSF3R,PTPN6,CD53,TNF,TNFSF14,FCER1G,ARHGAP4,PLEK,…
GO:BP	regulation of signaling	GO:0023051	1.58276e-21	20.8006	3276	1395	360	21118	IL1B,LILRB4A,HPSE,GPR35,NLRP3,IL1RN,CLEC7A,HCAR2,SCIMP,TRPM2,PIRB,5430427O19RIK,CD300LF,BTNL2,SPP1,DOCK2,HAVCR2,HRH2,CD36,PIK3AP1,C3,IL1A,RUNX3,CCL4,TREM2,TLR7,CAPN3,OSM,LY86,NCF1,SLA,CD86,F2RL2,C5AR1,FGD2,CCL12,CCR1,BANK1,CX3CR1,LGALS3,P2RY6,UNC5CL,TLR13,CD180,SPI1,PTPN6,RGS1,TNF,TNFSF14,C5AR2,PLEK,CNR2,RASAL3,ITGAL,TYROBP,CARD9,CD300A,LILR4B,PSD4,CSF1R,RELN,P2RY12,GPNMB,TFAP2B,FGR,FBN2,ALOX15,N…
GO:BP	lymphocyte activation	GO:0046649	2.0708e-21	20.6839	831	1395	139	21118	CD244,IL1B,SLAMF6,LILRB4A,NLRP3,ITGAD,CLEC7A,H2-OA,BTNL2,LAG3,DOCK2,HAVCR2,CLEC2I,RAC2,IL1A,VAV1,CCDC88B,BTK,RUNX3,LAT2,TNFRSF13B,TNFAIP8L2,CD86,AIF1,NCKAP1L,BCL2A1D,WDFY4,LY9,ITGB2,BANK1,APBB1IP,LGALS3,TNFSF13B,SLC11A1,CD48,TREML2,CD180,THEMIS2,SPI1,BLNK,PTPN6,TNFSF14,FCER1G,CORO1A,RASAL3,IKZF1,WAS,ITGAL,TYROBP,LST1,CD300A,SASH3,GPNMB,FGR,CD8A,RHOH,CD22,CCR6,POU2F2,IL1RL2,CCL2,PTPRC,NFATC2,LAPTM…
GO:BP	negative regulation of biological process	GO:0048519	2.25447e-21	20.647	5544	1395	535	21118	IL13RA2,IL1B,CST7,LILRB4A,MLXIPL,GPR35,NLRP3,TSPAN32,IL1RN,TIFAB,PKIB,MILR1,BCL2A1B,HCAR2,HK3,TRPM2,PIRB,CD84,CD300LF,BCL2A1A,H2-OA,BTNL2,LAG3,SPP1,CSN2,ADORA3,HAVCR2,HRH2,CLEC2I,CD36,PIK3AP1,C3,IL1A,BTK,RUNX3,CLEC5A,C1QC,TREM2,H2-OB,CAPN3,CD68,OSM,TNFRSF13B,TNFRSF9,TNFAIP8L2,HCK,CD86,AIF1,NCKAP1L,CD200R1,C5AR1,BCL2A1D,CCL12,CCR1,ADCY7,HPGDS,BANK1,CX3CR1,LGALS3,P2RY6,SLC11A1,CCR5,SPI1,PTPN6,RGS1,…
GO:BP	nervous system development	GO:0007399	2.41888e-21	20.6164	2421	1395	288	21118	IL1B,APOB,CST7,TIFAB,ITGAX,RAC2,C3,RUNX3,TREM2,OSM,AIF1,ATP1A3,NCKAP1L,C5AR1,C1QA,CCL12,CCR1,CX3CR1,CCR5,TNF,ARHGAP4,EMX2,RXRG,CXCR2,TYROBP,LST1,CSF1R,RELN,SLITRK4,P2RY12,TFAP2B,GAP43,NEURL1A,RHOH,FMN1,CCL3,LGI2,SYT4,BHLHE41,HEXB,CCL2,HMGA2,EN2,SEZ6,SALL1,SOX11,SALL3,NAV3,KIF5A,TUBB3,HCN1,SLITRK5,GABRB3,PAK3,TLE6,RAP1GAP2,NYAP1,POSTN,MAFB,CCL11,ONECUT2,RNF157,SYT1,ATCAY,MYO7A,DCX,MYO16,CNTN4,ARRB…
GO:BP	regulation of cell communication	GO:0010646	3.42338e-21	20.4655	3265	1395	358	21118	IL1B,LILRB4A,HPSE,GPR35,NLRP3,IL1RN,CLEC7A,HCAR2,SCIMP,TRPM2,PIRB,5430427O19RIK,CD300LF,BTNL2,SPP1,DOCK2,HAVCR2,HRH2,CD36,PIK3AP1,C3,IL1A,RUNX3,CCL4,TREM2,TLR7,CAPN3,OSM,LY86,NCF1,SLA,CD86,F2RL2,C5AR1,FGD2,CCL12,CCR1,BANK1,CX3CR1,LGALS3,P2RY6,UNC5CL,TLR13,CD180,SPI1,PTPN6,RGS1,TNF,TNFSF14,C5AR2,PLEK,CNR2,RASAL3,ITGAL,TYROBP,CARD9,CD300A,LILR4B,PSD4,CSF1R,RELN,P2RY12,GPNMB,TFAP2B,FGR,FBN2,ALOX15,N…
GO:BP	cell surface receptor signaling pathway	GO:0007166	7.10908e-21	20.1482	2673	1395	308	21118	IL13RA2,IL1B,GPR35,ITGAD,TSPAN32,IL1RN,MILR1,BCL2A1B,ITGAM,HCAR2,SCIMP,ITGAX,PIRB,CD300LF,BCL2A1A,BTNL2,P2RY13,LAG3,FCGR1,ADORA3,PRAM1,CLEC2I,CD36,C3,IL1A,VAV1,BTK,C3AR1,RUNX3,CCL4,TREM2,LAT2,OSM,LY86,NCF1,FCGR4,HCK,SLA,CD86,AFP,ATP1A3,FYB,NCKAP1L,ADGRE1,C5AR1,BCL2A1D,CCL12,CCR1,ITGB2,CX3CR1,LGALS3,TNFSF13B,P2RY6,UNC5CL,CCR5,CD180,THEMIS2,SPI1,CSF3R,BLNK,PTPN6,TNF,C5AR2,FCER1G,PTAFR,PLEK,CORO1A,C…
GO:BP	cell adhesion	GO:0007155	8.3472e-21	20.0785	1372	1395	192	21118	CD244,IL1B,HPSE,NLRP3,ITGAD,TSPAN32,IL1RN,MILR1,ITGAM,SIGLECF,ITGAX,CD33,BTNL2,LAG3,SPP1,EMILIN2,HAVCR2,RAC2,CD36,IL1A,VAV1,CCDC88B,RUNX3,TNFAIP8L2,CD86,AIF1,NCKAP1L,CD200R1,LY9,ITGB2,APBB1IP,CX3CR1,TNFSF13B,CCR5,SPI1,CSF3R,PTPN6,TNF,TNFSF14,PTAFR,PLEK,SIGLECH,CORO1A,RASAL3,ITGAL,CD300A,SASH3,RELN,P2RY12,GPNMB,MYO1G,ALOX15,RHOH,FMN1,FERMT3,LPXN,IL1RL2,ALOX5,CCL2,PTPRC,COL6A3,LAPTM5,PDE3B,PARVG,CA…
GO:BP	regulation of molecular function	GO:0065009	1.11845e-20	19.9514	3029	1395	337	21118	IL1B,CST7,LILRB4A,GPR35,NLRP3,IL1RN,CLEC7A,PKIB,CTSS,P2RY13,DOCK2,CSN2,FCGR1,ADORA3,HAVCR2,RAC2,CD36,EGLN3,ARHGAP9,C3,IL1A,VAV1,CCL4,TREM2,CAPN3,NCF1,HCK,CD86,NCKAP1L,C5AR1,BCL2A1D,FGD2,CCL12,ADCY7,ITGB2,CX3CR1,P2RY6,SLC11A1,SPI1,COX6A2,PTPN6,RGS1,TNF,TNFSF14,PTAFR,ARHGAP4,PLEK,CNR2,RASAL3,CARD9,APOC1,CD300A,LILR4B,PSD4,CSF1R,RNF180,RELN,DENND1C,KCNE3,FGR,NEURL1A,RHOH,CCL3,FXYD7,CHRM3,SH3BP1,CCL6…
GO:BP	defense response	GO:0006952	2.14453e-20	19.6687	1705	1395	222	21118	CD244,IL1B,SLAMF6,CST7,LILRB4A,NLRP3,TSPAN32,IL1RN,CLEC7A,ITGAX,5430427O19RIK,CTSS,LAG3,SAA3,DNASE1L3,FCGR1,HAVCR2,CD36,PIK3AP1,C3,IL1A,VAV1,CCDC88B,BTK,C3AR1,CLEC5A,C1QC,CCL4,TREM2,TLR7,CD68,OSM,LY86,NCF1,TNFAIP8L2,HCK,SLA,CD86,AIF1,CD200R1,C5AR1,TREM1,C1QA,LY9,CCL12,C1QB,CCR1,ADCY7,ITGB2,CX3CR1,LGALS3,SLC11A1,PLD4,TLR13,CCR5,CD180,THEMIS2,SPI1,PTPN6,TNF,C5AR2,FCER1G,PTAFR,CNR2,2610528A11RIK,CD3…
GO:BP	biological adhesion	GO:0022610	2.39105e-20	19.6214	1384	1395	192	21118	CD244,IL1B,HPSE,NLRP3,ITGAD,TSPAN32,IL1RN,MILR1,ITGAM,SIGLECF,ITGAX,CD33,BTNL2,LAG3,SPP1,EMILIN2,HAVCR2,RAC2,CD36,IL1A,VAV1,CCDC88B,RUNX3,TNFAIP8L2,CD86,AIF1,NCKAP1L,CD200R1,LY9,ITGB2,APBB1IP,CX3CR1,TNFSF13B,CCR5,SPI1,CSF3R,PTPN6,TNF,TNFSF14,PTAFR,PLEK,SIGLECH,CORO1A,RASAL3,ITGAL,CD300A,SASH3,RELN,P2RY12,GPNMB,MYO1G,ALOX15,RHOH,FMN1,FERMT3,LPXN,IL1RL2,ALOX5,CCL2,PTPRC,COL6A3,LAPTM5,PDE3B,PARVG,CA…
GO:BP	cytokine production	GO:0001816	7.94356e-20	19.1	731	1395	125	21118	CD244,IL1B,SLAMF6,HPSE,NLRP3,CLEC7A,SCIMP,CD84,BTNL2,LAG3,HAVCR2,CLEC2I,CD36,C3,IL1A,CCDC88B,BTK,C3AR1,CLEC5A,CCL4,TREM2,TLR7,OSM,TNFRSF9,AIF1,NCKAP1L,CD200R1,C5AR1,LY9,ADCY7,BANK1,CX3CR1,SLC11A1,PLD4,CCR5,PTPN6,TNF,C5AR2,FCER1G,PTAFR,TYROBP,CARD9,SASH3,CSF1R,ERMAP,GPNMB,FGR,TICAM2,CCL3,RNF128,POU2F2,IL1RL2,ALOX5,CCL2,PTPRC,LAPTM5,OAS3,IRF8,CARD11,CYBB,TLR9,NAV3,IL16,SLAMF1,SIRPA,INHBB,PYCARD,POS…
GO:BP	myeloid leukocyte activation	GO:0002274	8.58401e-20	19.0663	234	1395	64	21118	CD244,IL13RA2,CST7,LILRB4A,TSPAN32,MILR1,PIRB,CD84,CD300LF,DNASE1L3,DOCK2,HAVCR2,PRAM1,RAC2,BTK,TREM2,LAT2,FCGR4,AIF1,C5AR1,C1QA,CX3CR1,SLC11A1,CD48,SPI1,TNF,FCER1G,PTAFR,CNR2,CD37,CXCR2,TYROBP,CD300A,FGR,RHOH,CCL3,DCSTAMP,LCP2,TLR9,SLAMF1,TTBK1,BATF3,PYCARD,KLRK1,TLR1,UNC13D,CEBPA,TLR2,SYK,STXBP2,CCL5,CHGA,CTSC,IL4RA,GRN,TMEM106A,PRKCD,CASP1,PTPRE,TLR4,KIT,LYN,IFNGR2,TLR6
GO:BP	regulation of cytokine production	GO:0001817	1.04397e-19	18.9813	724	1395	124	21118	CD244,IL1B,SLAMF6,HPSE,NLRP3,CLEC7A,SCIMP,CD84,BTNL2,LAG3,HAVCR2,CLEC2I,CD36,C3,IL1A,CCDC88B,BTK,C3AR1,CLEC5A,CCL4,TREM2,TLR7,OSM,TNFRSF9,AIF1,NCKAP1L,CD200R1,C5AR1,LY9,ADCY7,BANK1,CX3CR1,SLC11A1,PLD4,CCR5,PTPN6,TNF,C5AR2,FCER1G,PTAFR,TYROBP,CARD9,SASH3,CSF1R,ERMAP,GPNMB,FGR,TICAM2,CCL3,RNF128,POU2F2,IL1RL2,ALOX5,CCL2,PTPRC,LAPTM5,OAS3,IRF8,CARD11,CYBB,TLR9,NAV3,IL16,SLAMF1,SIRPA,INHBB,PYCARD,POS…
GO:BP	response to stress	GO:0006950	3.93674e-19	18.4049	3817	1395	395	21118	CD244,IL1B,SLAMF6,CST7,LILRB4A,HPSE,NLRP3,TSPAN32,IL1RN,CLEC7A,BCL2A1B,SCIMP,ITGAX,HK3,TRPM2,5430427O19RIK,BCL2A1A,CTSS,LAG3,SAA3,SPP1,DNASE1L3,FCGR1,MGARP,HAVCR2,CD36,PIK3AP1,EGLN3,C3,IL1A,VAV1,CCDC88B,BTK,C3AR1,CLEC5A,C1QC,CCL4,TREM2,TLR7,CAPN3,CD68,OSM,LY86,NCF1,F9,TNFAIP8L2,FCGR4,HCK,SLA,CD86,AIF1,F2RL2,CD200R1,C5AR1,TREM1,BCL2A1D,C1QA,LY9,CCL12,C1QB,CCR1,ADCY7,ITGB2,CX3CR1,LGALS3,SLC11A1,PLD…
GO:BP	cellular response to chemical stimulus	GO:0070887	5.24342e-19	18.2804	3097	1395	337	21118	IL13RA2,IL1B,APOB,LILRB4A,MLXIPL,GPR35,NLRP3,IL1RN,SCIMP,HK3,TRPM2,PIRB,CD300LF,SLC2A5,CTSS,P2RY13,SAA3,SPP1,MGARP,HAVCR2,HRH2,RAC2,CD36,IL1A,VAV1,BTK,C3AR1,CCL4,TREM2,CAPN3,CD68,OSM,HVCN1,LY86,NCF1,FCGR4,BIN2,CD86,AIF1,ATP1A3,NCKAP1L,C5AR1,TREM1,UGT1A7C,CCL12,GNA15,CCR1,ADCY7,CX3CR1,LGALS3,TNFSF13B,P2RY6,HTR5B,CCR5,CD180,SPI1,CSF3R,PTPN6,TNF,TNFSF14,C5AR2,FCER1G,PTAFR,CNR2,2610528A11RIK,RXRG,COR…
GO:BP	regulation of catalytic activity	GO:0050790	6.09028e-19	18.2154	2308	1395	271	21118	IL1B,CST7,LILRB4A,NLRP3,IL1RN,CLEC7A,PKIB,P2RY13,DOCK2,CSN2,FCGR1,RAC2,EGLN3,ARHGAP9,C3,IL1A,VAV1,CCL4,CAPN3,NCF1,CD86,NCKAP1L,C5AR1,BCL2A1D,FGD2,CCL12,ADCY7,SLC11A1,COX6A2,PTPN6,RGS1,TNF,TNFSF14,PTAFR,ARHGAP4,PLEK,CNR2,RASAL3,CARD9,APOC1,CD300A,LILR4B,PSD4,CSF1R,RNF180,RELN,DENND1C,FGR,NEURL1A,RHOH,CCL3,SH3BP1,CCL6,SLC7A14,GPR65,RGS10,ALOX5,CCL2,HMGA2,PTPRC,COL6A3,LAPTM5,LCP2,GPR55,OAS3,ARHGAP22…
GO:BP	regulation of response to external stimulus	GO:0032101	9.02215e-19	18.0447	904	1395	141	21118	IL1B,SLAMF6,CST7,HPSE,NLRP3,TSPAN32,SCIMP,5430427O19RIK,CTSS,LAG3,DNASE1L3,FCGR1,HAVCR2,RAC2,CD36,PIK3AP1,C3,VAV1,BTK,C3AR1,CCL4,TREM2,CAPN3,OSM,LY86,TNFAIP8L2,AIF1,NCKAP1L,CD200R1,C5AR1,CCL12,CCR1,CX3CR1,CCR5,CD180,SPI1,TNF,TNFSF14,C5AR2,FCER1G,CNR2,CD37,ALOX5AP,CXCR2,TYROBP,CARD9,CSF1R,P2RY12,FGR,ALOX15,CCL3,CCR6,IL1RL2,ALOX5,CCL2,OAS3,KLRB1B,TLR9,IL16,SLAMF1,SIRPA,LGMN,TTBK1,LACC1,PYCARD,PYHIN…
GO:BP	negative regulation of cellular process	GO:0048523	1.20864e-18	17.9177	5068	1395	489	21118	IL13RA2,IL1B,CST7,LILRB4A,MLXIPL,GPR35,NLRP3,TSPAN32,IL1RN,PKIB,MILR1,BCL2A1B,HK3,TRPM2,PIRB,CD84,CD300LF,BCL2A1A,BTNL2,LAG3,SPP1,CSN2,ADORA3,HAVCR2,CLEC2I,CD36,PIK3AP1,C3,IL1A,BTK,RUNX3,CLEC5A,C1QC,TREM2,CAPN3,OSM,TNFRSF13B,TNFRSF9,TNFAIP8L2,HCK,CD86,AIF1,NCKAP1L,CD200R1,C5AR1,BCL2A1D,CCL12,HPGDS,BANK1,CX3CR1,LGALS3,P2RY6,SLC11A1,CCR5,SPI1,PTPN6,RGS1,TNF,TNFSF14,C5AR2,FCER1G,ARHGAP4,PLEK,CNR2,26…
GO:BP	regulation of cell activation	GO:0050865	1.24218e-18	17.9058	698	1395	119	21118	CD244,IL13RA2,IL1B,CST7,LILRB4A,NLRP3,TSPAN32,CLEC7A,MILR1,CD84,CD300LF,H2-OA,BTNL2,LAG3,HAVCR2,PRAM1,CLEC2I,RAC2,IL1A,CCDC88B,BTK,RUNX3,TREM2,CAPN3,TNFRSF13B,TNFAIP8L2,CD86,AIF1,NCKAP1L,BANK1,LGALS3,TNFSF13B,THEMIS2,SPI1,PTPN6,TNF,TNFSF14,FCER1G,PTAFR,PLEK,CNR2,CD37,CORO1A,RASAL3,ITGAL,TYROBP,LST1,CD300A,SASH3,GPNMB,FGR,RHOH,IL1RL2,CCL2,PTPRC,NFATC2,LAPTM5,CARD11,H2-AA,SOX11,TLR9,SLAMF1,SIRPA,DO…
GO:BP	response to stimulus	GO:0050896	2.59353e-18	17.5861	9950	1395	829	21118	CD244,IL13RA2,IL1B,SLAMF6,APOB,CST7,LILRB4A,MLXIPL,HPSE,GPR35,NLRP3,ITGAD,TSPAN32,IL1RN,CLEC7A,TIFAB,MILR1,TBXAS1,BCL2A1B,ITGAM,HCAR2,SCIMP,ITGAX,HK3,TRPM2,PIRB,PILRA,5430427O19RIK,CD84,CD300LF,BCL2A1A,HAAO,H2-OA,BTNL2,SLC2A5,CTSS,P2RY13,LAG3,SAA3,SPP1,DNASE1L3,DOCK2,FCGR1,MGARP,ADORA3,HAVCR2,HRH2,PRAM1,CLEC2I,RAC2,CD36,PIK3AP1,EGLN3,ARHGAP9,C3,IL1A,VAV1,CCDC88B,BTK,C3AR1,RUNX3,CLEC5A,C1QC,CCL4,T…
GO:BP	regulation of transport	GO:0051049	2.74844e-18	17.5609	1871	1395	231	21118	IL13RA2,IL1B,GPR35,IL1RN,CLEC7A,TIFAB,SIGLECF,HCAR2,TRPM2,CD84,CD300LF,CTSS,SPP1,DOCK2,FCGR1,HRH2,PRAM1,RAC2,CD36,C3,IL1A,CCL4,TREM2,CAPN3,OSM,HVCN1,HCK,NCKAP1L,CCL12,CCR1,LGALS3,P2RY6,CACNA1S,SLC11A1,SPI1,PTPN6,TNF,FCER1G,PTAFR,CYP4F18,CORO1A,APOC1,CD300A,RELN,P2RY12,TFAP2B,KCNE3,FGR,PTGS1,ALOX15,CD22,CCL3,FXYD7,CHRM3,SYT4,CNIH2,CACNG8,SYT6,ALOX5,CCL2,KCND1,HMGA2,PTPRC,HK2,AK1,C2,SOX11,CYBB,TLR9…
GO:BP	T cell activation	GO:0042110	4.02904e-18	17.3948	502	1395	96	21118	CD244,IL1B,SLAMF6,LILRB4A,NLRP3,ITGAD,H2-OA,BTNL2,LAG3,DOCK2,HAVCR2,CLEC2I,RAC2,IL1A,VAV1,CCDC88B,RUNX3,TNFAIP8L2,CD86,AIF1,NCKAP1L,BCL2A1D,WDFY4,LY9,APBB1IP,LGALS3,TNFSF13B,SLC11A1,CD48,TREML2,SPI1,PTPN6,TNFSF14,FCER1G,CORO1A,RASAL3,WAS,ITGAL,CD300A,SASH3,GPNMB,CD8A,RHOH,CCR6,IL1RL2,CCL2,PTPRC,LAPTM5,CARD11,H2-AA,SLAMF1,SIRPA,DOCK8,NFKBID,PYCARD,SLFN1,CLEC4A2,CD74,PLA2G2D,MAFB,GPR18,EBI3,ELF4,CD…
GO:BP	neurogenesis	GO:0022008	4.26231e-18	17.3704	1776	1395	222	21118	IL1B,RAC2,C3,RUNX3,TREM2,NCKAP1L,C5AR1,C1QA,CCL12,CX3CR1,CCR5,TNF,ARHGAP4,EMX2,LST1,CSF1R,RELN,SLITRK4,P2RY12,GAP43,NEURL1A,RHOH,FMN1,CCL3,SYT4,BHLHE41,HEXB,CCL2,HMGA2,EN2,SEZ6,SOX11,SALL3,NAV3,KIF5A,TUBB3,HCN1,SLITRK5,GABRB3,PAK3,TLE6,RAP1GAP2,NYAP1,POSTN,CCL11,ONECUT2,RNF157,SYT1,ATCAY,MYO7A,DCX,MYO16,CNTN4,PENK,TLR2,CRMP1,SLITRK2,BRINP3,DCC,ATP8A2,CEBPB,ERBB3,AREG,DSCAM,ARSB,PTPN5,ETV4,ZFP536,…
GO:BP	regulation of cell adhesion	GO:0030155	5.77241e-18	17.2386	720	1395	120	21118	CD244,IL1B,NLRP3,IL1RN,BTNL2,LAG3,SPP1,HAVCR2,RAC2,CD36,IL1A,VAV1,CCDC88B,RUNX3,TNFAIP8L2,CD86,AIF1,NCKAP1L,APBB1IP,TNFSF13B,CCR5,SPI1,PTPN6,TNF,TNFSF14,PTAFR,CORO1A,RASAL3,ITGAL,CD300A,SASH3,P2RY12,GPNMB,ALOX15,RHOH,FMN1,FERMT3,LPXN,IL1RL2,ALOX5,CCL2,PTPRC,LAPTM5,PDE3B,CARD11,H2-AA,SLAMF1,SIRPA,DOCK8,NFKBID,PYCARD,SLFN1,POSTN,CD74,PLA2G2D,ONECUT2,UNC13D,DUSP26,ITGB3,CDKN2A,CD83,CEBPB,ERBB3,DSCAM…
GO:BP	negative regulation of multicellular organismal process	GO:0051241	6.18715e-18	17.2085	1083	1395	157	21118	IL1B,GPR35,NLRP3,TIFAB,CD84,LAG3,HAVCR2,CLEC2I,CD36,BTK,RUNX3,C1QC,TREM2,TNFRSF9,CD86,NCKAP1L,CD200R1,CCR1,ADCY7,HPGDS,BANK1,CX3CR1,SLC11A1,CCR5,SPI1,PTPN6,TNF,C5AR2,ARHGAP4,TYROBP,APOC1,PDCD1,GPNMB,TMEM119,TICAM2,CCL3,CHRM3,SYT4,RNF128,MLIP,ALOX5,CCL2,HMGA2,PTPRC,LAPTM5,PDE3B,GPR55,OAS3,SOX11,TLR9,NAV3,SLAMF1,SIRPA,LGMN,TNFRSF11B,NFKBID,INHBB,PYCARD,CLEC4A2,CD74,MAFB,GPR18,CCL11,UCN2,KCNK2,ACP5,…
GO:BP	regulation of multicellular organismal development	GO:2000026	8.47273e-18	17.072	1444	1395	191	21118	IL1B,CST7,HPSE,NLRP3,ITGAX,H2-OA,LAG3,CLEC2I,CD36,C3,IL1A,C3AR1,RUNX3,C1QC,TREM2,CAPN3,NCKAP1L,C5AR1,CCR1,ITGB2,CX3CR1,CCR5,SPI1,CSF3R,PTPN6,TNF,ARHGAP4,RXRG,CELA1,CXCR2,TYROBP,SASH3,CSF1R,RELN,SLITRK4,TMEM119,FBN2,NEURL1A,RHOH,CCL3,SYT4,DCSTAMP,BHLHE41,IL1RL2,ALOX5,CCL2,HMGA2,PTPRC,HK2,PDE3B,GPR55,CARD11,H2-AA,SOX11,CYBB,CD101,TLR9,DUSP9,SLITRK5,PAK3,HCLS1,NFKBID,TLE6,PIK3CD,CD74,MAFB,CCL11,RAB7…
GO:BP	regulation of signal transduction	GO:0009966	1.6003e-17	16.7958	2853	1395	312	21118	IL1B,LILRB4A,HPSE,GPR35,NLRP3,IL1RN,CLEC7A,SCIMP,5430427O19RIK,CD300LF,BTNL2,DOCK2,HAVCR2,CD36,PIK3AP1,C3,IL1A,RUNX3,CCL4,TREM2,TLR7,CAPN3,OSM,LY86,NCF1,SLA,CD86,F2RL2,C5AR1,FGD2,CCL12,CCR1,BANK1,CX3CR1,LGALS3,P2RY6,UNC5CL,TLR13,CD180,SPI1,PTPN6,RGS1,TNF,TNFSF14,C5AR2,PLEK,RASAL3,ITGAL,CARD9,CD300A,LILR4B,PSD4,CSF1R,RELN,P2RY12,GPNMB,TFAP2B,FGR,FBN2,ALOX15,NEURL1A,TICAM2,CD8A,RHOH,CD22,CCL3,IL10R…
GO:BP	regulation of cell migration	GO:0030334	1.99098e-17	16.7009	934	1395	141	21118	IL1B,IL1RN,CLEC7A,ITGAX,ADORA3,RAC2,IL1A,C3AR1,CCL4,TREM2,AIF1,NCKAP1L,CD200R1,C5AR1,CCL12,CCR1,CX3CR1,LGALS3,P2RY6,CCR5,SPI1,TNF,TNFSF14,C5AR2,PTAFR,ARHGAP4,2610528A11RIK,CORO1A,CXCR2,CD300A,CSF1R,RELN,P2RY12,GPNMB,FGR,RHOH,CCL3,FERMT3,CCR6,SH3BP1,CCL2,PTPRC,NAV3,SLAMF1,LGMN,DOCK8,PAK3,PYCARD,POSTN,PIK3CD,CD74,GPR18,CCL11,ONECUT2,ITGB3,CXCL16,MYO5A,PLAU,ARSB,ANGPT2,CD63,PTK2B,PIK3CG,ADORA1,CCL5,…
GO:BP	regulation of developmental process	GO:0050793	2.03807e-17	16.6908	2591	1395	290	21118	IL1B,APOB,CST7,HPSE,NLRP3,CLEC7A,TIFAB,ITGAX,H2-OA,LAG3,CLEC2I,RAC2,CD36,C3,IL1A,C3AR1,RUNX3,C1QC,TREM2,CAPN3,HCK,CD86,NCKAP1L,C5AR1,CCL12,CCR1,ITGB2,CX3CR1,TNFSF13B,CCR5,SPI1,CSF3R,PTPN6,CD53,TNF,TNFSF14,ARHGAP4,RXRG,CORO1A,CELA1,CXCR2,TYROBP,SASH3,CSF1R,RELN,SLITRK4,P2RY12,PDCD1,TFAP2B,FGR,TMEM119,FBN2,NEURL1A,RHOH,CCL3,SYT4,DCSTAMP,BHLHE41,HEXB,IL1RL2,ALOX5,CCL2,HMGA2,PTPRC,NFATC2,SEZ6,HK2,FMN…
GO:BP	positive regulation of cell communication	GO:0010647	2.99755e-17	16.5232	1725	1395	215	21118	IL1B,HPSE,GPR35,IL1RN,CLEC7A,HCAR2,SCIMP,TRPM2,PIRB,5430427O19RIK,CD300LF,SPP1,DOCK2,HAVCR2,CD36,PIK3AP1,C3,IL1A,RUNX3,CCL4,TREM2,TLR7,OSM,LY86,NCF1,CD86,F2RL2,C5AR1,FGD2,CCL12,CCR1,BANK1,CX3CR1,P2RY6,UNC5CL,CD180,SPI1,PTPN6,TNF,TNFSF14,C5AR2,ITGAL,TYROBP,CARD9,CD300A,CSF1R,RELN,P2RY12,GPNMB,FGR,ALOX15,NEURL1A,TICAM2,CD8A,CCL3,IL10RA,ESM1,CCL6,HCST,CCL2,PTPRC,LAPTM5,SALL1,GPR55,CARD11,SOX11,TLR9,…
GO:BP	establishment of localization	GO:0051234	4.31794e-17	16.3647	4658	1395	452	21118	IL13RA2,IL1B,ABCC3,APOB,GPR35,IL1RN,CLEC7A,TIFAB,MILR1,SIGLECF,HCAR2,TRPM2,CD84,CD300LF,SLC2A5,CTSS,SPP1,DOCK2,CSN2,FCGR1,MGARP,HRH2,PRAM1,RAC2,CD36,C3,IL1A,VAV1,CCDC88B,SPNS3,NCF4,BTK,ARL11,CCL4,TREM2,CAPN3,CD68,LAT2,OSM,HVCN1,STRA6L,RAB39,NCF1,BIN2,HCK,AIF1,ATP1A3,NCKAP1L,CCL12,CCR1,CSN3,ITGB2,LGALS3,P2RY6,CACNA1S,SLC11A1,PLD4,CCR5,SPI1,COX6A2,AA467197,PTPN6,TNF,FCER1G,PTAFR,PLEK,SIGLECH,CYP4F1…
GO:BP	positive regulation of signaling	GO:0023056	4.91308e-17	16.3086	1732	1395	215	21118	IL1B,HPSE,GPR35,IL1RN,CLEC7A,HCAR2,SCIMP,TRPM2,PIRB,5430427O19RIK,CD300LF,SPP1,DOCK2,HAVCR2,CD36,PIK3AP1,C3,IL1A,RUNX3,CCL4,TREM2,TLR7,OSM,LY86,NCF1,CD86,F2RL2,C5AR1,FGD2,CCL12,CCR1,BANK1,CX3CR1,P2RY6,UNC5CL,CD180,SPI1,PTPN6,TNF,TNFSF14,C5AR2,ITGAL,TYROBP,CARD9,CD300A,CSF1R,RELN,P2RY12,GPNMB,FGR,ALOX15,NEURL1A,TICAM2,CD8A,CCL3,IL10RA,ESM1,CCL6,HCST,CCL2,PTPRC,LAPTM5,SALL1,GPR55,CARD11,SOX11,TLR9,…
GO:BP	negative regulation of immune system process	GO:0002683	1.05258e-16	15.9777	422	1395	84	21118	IL13RA2,CST7,LILRB4A,TSPAN32,MILR1,CD84,CD300LF,H2-OA,BTNL2,LAG3,HAVCR2,CLEC2I,BTK,RUNX3,C1QC,H2-OB,CD68,TNFRSF13B,TNFAIP8L2,CD86,CD200R1,CCL12,CCR1,BANK1,SPI1,PTPN6,TNF,C5AR2,FCER1G,CNR2,CD37,TYROBP,LST1,CD300A,PDCD1,GPNMB,FGR,ALOX15,CD22,CCL3,LPXN,PTPRC,LAPTM5,GPR55,OAS3,KLRB1B,H2-AA,SOX11,SLAMF1,NFKBID,SLFN1,CD74,PLA2G2D,MAFB,GPR18,ARRB2,PLCL2,CDKN2A,CEBPB,FGL2,PAG1,ADORA1,IFI202B,CD80,UBASH3B…
GO:BP	cell chemotaxis	GO:0060326	1.52077e-16	15.8179	304	1395	69	21118	IL1B,GPR35,TRPM2,SAA3,SPP1,RAC2,VAV1,C3AR1,CCL4,BIN2,AIF1,NCKAP1L,C5AR1,TREM1,CCL12,CCR1,CX3CR1,LGALS3,CCR5,SPI1,CSF3R,TNFSF14,C5AR2,FCER1G,CNR2,2610528A11RIK,CORO1A,CXCR2,CSF1R,CCL3,CCR6,CCL6,ALOX5,CCL2,IL16,SLAMF1,LGMN,CD74,GPR18,CCL11,CCL9,ARRB2,CXCL16,SYK,PTK2B,CCL5,HRH1,PTPRO,CHGA,PDGFRA,IL17RA,PGF,CCRL2,CMKLR1,MIF,CXCL14,PRKCD,GPSM3,CAMK1D,SERPINE1,ACKR2,PLXNB3,P2RX4,KIT,CKLF,LYN,RHOG,ABCC1…
GO:BP	positive regulation of developmental process	GO:0051094	2.59704e-16	15.5855	1412	1395	184	21118	IL1B,APOB,HPSE,NLRP3,CLEC7A,ITGAX,CD36,C3,IL1A,C3AR1,RUNX3,TREM2,CAPN3,NCKAP1L,C5AR1,CCR1,ITGB2,CX3CR1,TNFSF13B,CCR5,CD53,TNF,TNFSF14,CELA1,CXCR2,TYROBP,SASH3,CSF1R,RELN,SLITRK4,TMEM119,FBN2,NEURL1A,RHOH,CCL3,SYT4,DCSTAMP,IL1RL2,ALOX5,HMGA2,PTPRC,NFATC2,HK2,H2-AA,SOX11,CYBB,CD101,SLITRK5,PAK3,HCLS1,NFKBID,TLE6,PIK3CD,CD74,CCL11,RNF157,SYT1,RAB7B,UNC13D,DCX,CEBPA,ARRB2,TLR2,ITGB3,SLITRK2,BRINP3,LR…
GO:BP	regulation of cellular component movement	GO:0051270	2.95e-16	15.5302	1074	1395	152	21118	IL1B,IL1RN,CLEC7A,ITGAX,ADORA3,RAC2,IL1A,C3AR1,CCL4,TREM2,AIF1,NCKAP1L,CD200R1,C5AR1,CCL12,CCR1,CX3CR1,LGALS3,P2RY6,CCR5,SPI1,TNF,TNFSF14,C5AR2,PTAFR,ARHGAP4,2610528A11RIK,CORO1A,WAS,CXCR2,CD300A,CSF1R,RELN,P2RY12,GPNMB,FGR,RHOH,CCL3,FERMT3,CCR6,SH3BP1,CNIH2,CCL2,PTPRC,NAV3,SLAMF1,LGMN,DOCK8,PAK3,PYCARD,POSTN,PIK3CD,CD74,GPR18,CCL11,ONECUT2,ITGB3,CXCL16,MYO5A,PLAU,ARSB,ANGPT2,CD63,PTK2B,PIK3CG,AD…
GO:BP	myeloid leukocyte migration	GO:0097529	3.63835e-16	15.4391	220	1395	57	21118	IL1B,GPR35,SPP1,RAC2,IL1A,VAV1,C3AR1,CCL4,TREM2,AIF1,NCKAP1L,CD200R1,C5AR1,TREM1,CCL12,CCR1,CX3CR1,LGALS3,SPI1,CSF3R,C5AR2,FCER1G,CXCR2,CD300A,CSF1R,P2RY12,RHOH,CCL3,CCL6,CCL2,SLAMF1,SIRPA,LGMN,CD74,CCL11,CCL9,SYK,PTK2B,CCL5,HRH1,PTPRO,CHGA,IL17RA,PGF,CMKLR1,MMP14,MIF,EMILIN1,CAMK1D,SERPINE1,CD9,P2RX4,KIT,CKLF,LYN,RHOG,RPS19
GO:BP	cell-cell adhesion	GO:0098609	3.85755e-16	15.4137	825	1395	127	21118	CD244,IL1B,NLRP3,ITGAD,TSPAN32,IL1RN,MILR1,ITGAX,BTNL2,LAG3,HAVCR2,RAC2,IL1A,CCDC88B,RUNX3,TNFAIP8L2,CD86,AIF1,NCKAP1L,CD200R1,ITGB2,CX3CR1,TNFSF13B,CCR5,SPI1,PTPN6,TNF,TNFSF14,PTAFR,PLEK,CORO1A,RASAL3,ITGAL,CD300A,SASH3,P2RY12,GPNMB,ALOX15,RHOH,FERMT3,IL1RL2,ALOX5,CCL2,PTPRC,LAPTM5,CARD11,H2-AA,SLAMF1,SIRPA,DOCK8,GCNT1,ITGB5,NFKBID,PYCARD,SLFN1,CDH19,CD74,PLA2G2D,IGSF21,ITGB3,SLITRK2,CDKN2A,CD83…
GO:BP	regulation of cell motility	GO:2000145	4.33918e-16	15.3626	986	1395	143	21118	IL1B,IL1RN,CLEC7A,ITGAX,ADORA3,RAC2,IL1A,C3AR1,CCL4,TREM2,AIF1,NCKAP1L,CD200R1,C5AR1,CCL12,CCR1,CX3CR1,LGALS3,P2RY6,CCR5,SPI1,TNF,TNFSF14,C5AR2,PTAFR,ARHGAP4,2610528A11RIK,CORO1A,WAS,CXCR2,CD300A,CSF1R,RELN,P2RY12,GPNMB,FGR,RHOH,CCL3,FERMT3,CCR6,SH3BP1,CCL2,PTPRC,NAV3,SLAMF1,LGMN,DOCK8,PAK3,PYCARD,POSTN,PIK3CD,CD74,GPR18,CCL11,ONECUT2,ITGB3,CXCL16,MYO5A,PLAU,ARSB,ANGPT2,CD63,PTK2B,PIK3CG,ADORA1,C…
GO:BP	transport	GO:0006810	8.31418e-16	15.0802	4502	1395	435	21118	IL13RA2,IL1B,ABCC3,APOB,GPR35,IL1RN,CLEC7A,TIFAB,MILR1,SIGLECF,HCAR2,TRPM2,CD84,CD300LF,SLC2A5,CTSS,SPP1,DOCK2,CSN2,FCGR1,MGARP,HRH2,PRAM1,RAC2,CD36,C3,IL1A,VAV1,CCDC88B,SPNS3,NCF4,BTK,ARL11,CCL4,TREM2,CAPN3,LAT2,OSM,HVCN1,STRA6L,RAB39,NCF1,BIN2,HCK,AIF1,ATP1A3,NCKAP1L,CCL12,CCR1,CSN3,ITGB2,LGALS3,P2RY6,CACNA1S,SLC11A1,PLD4,CCR5,SPI1,COX6A2,AA467197,PTPN6,TNF,FCER1G,PTAFR,PLEK,SIGLECH,CYP4F18,COR…
GO:BP	regulation of locomotion	GO:0040012	9.07392e-16	15.0422	1035	1395	147	21118	IL1B,IL1RN,CLEC7A,ITGAX,ADORA3,RAC2,IL1A,C3AR1,CCL4,TREM2,AIF1,NCKAP1L,CD200R1,C5AR1,CCL12,CCR1,CX3CR1,LGALS3,P2RY6,CCR5,SPI1,TNF,TNFSF14,C5AR2,PTAFR,ARHGAP4,2610528A11RIK,CORO1A,WAS,CXCR2,CD300A,CSF1R,RELN,P2RY12,GPNMB,FGR,RHOH,CCL3,FERMT3,CCR6,SH3BP1,CCL2,PTPRC,NAV3,IL16,SLAMF1,LGMN,DOCK8,PAK3,PYCARD,POSTN,PIK3CD,CD74,GPR18,CCL11,ONECUT2,ITGB3,CXCL16,MYO5A,DSCAM,PLAU,ARSB,ANGPT2,CD63,PTK2B,PIK3…
GO:BP	positive regulation of cytokine production	GO:0001819	9.40458e-16	15.0267	462	1395	87	21118	CD244,IL1B,SLAMF6,HPSE,NLRP3,CLEC7A,SCIMP,BTNL2,HAVCR2,CD36,C3,IL1A,CCDC88B,C3AR1,CLEC5A,CCL4,TREM2,TLR7,OSM,AIF1,C5AR1,LY9,SLC11A1,CCR5,TNF,FCER1G,PTAFR,TYROBP,CARD9,SASH3,CSF1R,FGR,TICAM2,CCL3,POU2F2,IL1RL2,CCL2,PTPRC,LAPTM5,OAS3,IRF8,CARD11,CYBB,TLR9,IL16,SLAMF1,PYCARD,POSTN,CD74,KLRK1,TLR1,RAB7B,TLR2,CD83,CEBPB,NAIP5,SYK,NFAM1,IFI202B,SULF2,CCL5,IL17RA,LRP1,IRF5,IL4RA,CD276,P2RX7,SCAMP5,MIF,T…
GO:BP	regulation of leukocyte activation	GO:0002694	1.32051e-15	14.8793	654	1395	108	21118	CD244,IL13RA2,IL1B,CST7,LILRB4A,NLRP3,TSPAN32,CLEC7A,MILR1,CD84,CD300LF,H2-OA,BTNL2,LAG3,HAVCR2,PRAM1,CLEC2I,RAC2,IL1A,CCDC88B,BTK,RUNX3,TREM2,TNFRSF13B,TNFAIP8L2,CD86,AIF1,NCKAP1L,BANK1,LGALS3,TNFSF13B,THEMIS2,SPI1,PTPN6,TNF,TNFSF14,FCER1G,PTAFR,CNR2,CD37,CORO1A,RASAL3,ITGAL,TYROBP,LST1,CD300A,SASH3,GPNMB,FGR,RHOH,IL1RL2,CCL2,PTPRC,NFATC2,LAPTM5,CARD11,H2-AA,SOX11,TLR9,SLAMF1,SIRPA,DOCK8,TTBK1,N…
GO:BP	positive regulation of intracellular signal transduction	GO:1902533	1.5229e-15	14.8173	969	1395	140	21118	IL1B,HPSE,GPR35,IL1RN,CLEC7A,SCIMP,DOCK2,HAVCR2,CD36,PIK3AP1,C3,IL1A,CCL4,TREM2,TLR7,OSM,NCF1,CD86,F2RL2,C5AR1,FGD2,CCL12,CCR1,BANK1,CX3CR1,P2RY6,UNC5CL,SPI1,PTPN6,TNF,TNFSF14,C5AR2,ITGAL,CARD9,CSF1R,RELN,P2RY12,GPNMB,FGR,ALOX15,CD8A,CCL3,CCL6,HCST,CCL2,PTPRC,LAPTM5,GPR55,CARD11,SOX11,TLR9,SLAMF1,PIK3R5,PAK3,HCLS1,DGKI,PYCARD,PIK3CD,CD74,GPR18,CCL11,CCL9,SLC15A3,ARRB2,TLR2,ITGB3,CDKN2A,DCC,ERBB3,…
GO:BP	leukocyte chemotaxis	GO:0030595	1.85795e-15	14.731	220	1395	56	21118	IL1B,GPR35,TRPM2,SPP1,RAC2,VAV1,C3AR1,CCL4,AIF1,NCKAP1L,C5AR1,TREM1,CCL12,CCR1,LGALS3,SPI1,CSF3R,TNFSF14,C5AR2,FCER1G,CNR2,2610528A11RIK,CORO1A,CXCR2,CSF1R,CCL3,CCR6,CCL6,ALOX5,CCL2,IL16,SLAMF1,LGMN,CD74,GPR18,CCL11,CCL9,CXCL16,SYK,PTK2B,CCL5,HRH1,PTPRO,CHGA,IL17RA,PGF,CMKLR1,MIF,CXCL14,GPSM3,CAMK1D,SERPINE1,KIT,CKLF,LYN,RPS19
GO:BP	positive regulation of response to external stimulus	GO:0032103	4.27411e-15	14.3692	404	1395	79	21118	IL1B,SLAMF6,SCIMP,5430427O19RIK,CTSS,LAG3,FCGR1,HAVCR2,RAC2,C3,VAV1,BTK,C3AR1,CCL4,TREM2,OSM,LY86,AIF1,NCKAP1L,C5AR1,CCR1,CCR5,CD180,SPI1,TNF,TNFSF14,FCER1G,ALOX5AP,CXCR2,TYROBP,CARD9,CSF1R,P2RY12,CCL3,CCR6,CCL2,TLR9,IL16,SLAMF1,LGMN,TTBK1,PYCARD,PYHIN1,CD74,KLRK1,CEBPA,TLR2,CEBPB,DSCAM,IKBKE,PTK2B,PIK3CG,IFI202B,CCL5,IL17RA,PGF,LRP1,CDH13,CTSC,CMKLR1,GRN,MIF,CXCL14,CXCR4,IFI204,AIM2,NTRK3,GPSM3,…
GO:BP	response to biotic stimulus	GO:0009607	6.89449e-15	14.1615	1601	1395	197	21118	CD244,IL1B,SLAMF6,APOB,LILRB4A,NLRP3,TSPAN32,CLEC7A,SCIMP,ITGAX,5430427O19RIK,LAG3,SAA3,FCGR1,HAVCR2,CD36,C3,IL1A,VAV1,CCDC88B,BTK,CLEC5A,C1QC,CCL4,TREM2,TLR7,CD68,LY86,NCF1,TNFAIP8L2,FCGR4,HCK,SLA,CD86,AIF1,C5AR1,TREM1,WDFY4,C1QA,LY9,CCL12,C1QB,CCR1,BANK1,CX3CR1,LGALS3,SLC11A1,PLD4,TLR13,CD180,SPI1,AA467197,PTPN6,RGS1,TNF,FCER1G,PTAFR,CNR2,2610528A11RIK,CD37,CORO1A,CD52,WAS,TYROBP,CARD9,CSF1R,FG…
GO:BP	positive regulation of signal transduction	GO:0009967	1.02563e-14	13.989	1506	1395	188	21118	IL1B,HPSE,GPR35,IL1RN,CLEC7A,SCIMP,5430427O19RIK,CD300LF,DOCK2,HAVCR2,CD36,PIK3AP1,C3,IL1A,RUNX3,CCL4,TREM2,TLR7,OSM,LY86,NCF1,CD86,F2RL2,C5AR1,FGD2,CCL12,CCR1,BANK1,CX3CR1,P2RY6,UNC5CL,CD180,SPI1,PTPN6,TNF,TNFSF14,C5AR2,ITGAL,CARD9,CD300A,CSF1R,RELN,P2RY12,GPNMB,FGR,ALOX15,NEURL1A,TICAM2,CD8A,CCL3,IL10RA,ESM1,CCL6,HCST,CCL2,PTPRC,LAPTM5,SALL1,GPR55,CARD11,SOX11,TLR9,SLAMF1,PIK3R5,PAK3,HCLS1,DGKI…
GO:BP	regulation of cellular component organization	GO:0051128	1.22768e-14	13.9109	2428	1395	267	21118	IL1B,CLEC7A,PKIB,SIGLECF,TRPM2,FCGR1,MGARP,CLEC2I,RAC2,CD36,C3,IL1A,TREM2,OSM,HCK,NCKAP1L,LGALS3,CCR5,SPI1,CD53,TNF,TNFSF14,ARHGAP4,PLEK,CORO1A,WAS,TYROBP,CD300A,CSF1R,RELN,SLITRK4,P2RY12,CSF2RB,FGR,GAP43,ALOX15,NEURL1A,RHOH,FMN1,CD22,IL10RA,SYT4,SH3BP1,DCSTAMP,GPR65,CAPN6,NFATC2,SEZ6,ARHGAP22,PDLIM4,NAV3,SLAMF1,TTBK1,SLITRK5,PAK3,HCLS1,PYCARD,RAP1GAP2,CCL11,RNF157,COTL1,SYT1,DCX,TRO,ARRB2,ITGB3,…
GO:BP	positive regulation of catalytic activity	GO:0043085	1.3302e-14	13.8761	1268	1395	166	21118	IL1B,NLRP3,IL1RN,CLEC7A,PKIB,DOCK2,FCGR1,EGLN3,ARHGAP9,VAV1,CCL4,NCF1,CD86,NCKAP1L,FGD2,CCL12,SLC11A1,RGS1,TNF,PTAFR,ARHGAP4,PLEK,RASAL3,CARD9,CD300A,CSF1R,RELN,FGR,NEURL1A,CCL3,SH3BP1,CCL6,GPR65,RGS10,ALOX5,CCL2,HMGA2,PTPRC,LAPTM5,LCP2,GPR55,ARHGAP22,NLRP1B,TLR9,LGMN,DOCK8,PIK3R5,TTBK1,PAK3,PYCARD,TAGAP,RAP1GAP2,RASA4,CD74,CCL11,TLR1,CCL9,ARRB2,GMIP,ITGB3,EEF1A2,CDKN2A,ANG,CTSD,RGS7,ERBB3,AREG,I…
GO:BP	defense response to other organism	GO:0098542	1.38449e-14	13.8587	1140	1395	154	21118	CD244,IL1B,SLAMF6,NLRP3,TSPAN32,CLEC7A,ITGAX,5430427O19RIK,LAG3,FCGR1,HAVCR2,CD36,C3,VAV1,CCDC88B,BTK,CLEC5A,C1QC,CCL4,TREM2,TLR7,LY86,NCF1,TNFAIP8L2,HCK,SLA,CD86,AIF1,C5AR1,TREM1,C1QA,LY9,CCL12,C1QB,CCR1,CX3CR1,LGALS3,SLC11A1,PLD4,TLR13,CD180,SPI1,PTPN6,TNF,FCER1G,2610528A11RIK,CD37,CORO1A,WAS,TYROBP,CARD9,CSF1R,FGR,TICAM2,CD8A,CCL3,CCL6,IL1RL2,CCL2,RAB20,PTPRC,OAS3,KLRB1B,RNASE6,IRF8,C2,H2-AA,N…
GO:BP	anatomical structure morphogenesis	GO:0009653	1.76708e-14	13.7527	2715	1395	290	21118	IL1B,APOB,HPSE,IL1RN,TIFAB,ITGAX,HRH2,RAC2,CD36,C3,IL1A,C3AR1,RUNX3,TREM2,CAPN3,HCK,NCKAP1L,C5AR1,CCL12,ITGB2,CX3CR1,TNFSF13B,CCR5,SPI1,CSF3R,PTPN6,CD53,TNF,TNFSF14,ARHGAP4,EMX2,CORO1A,CELA1,CAR9,CXCR2,TYROBP,LST1,CSF1R,RELN,SLITRK4,TFAP2B,FGR,GAP43,TMEM119,FBN2,RHOH,FMN1,CCL3,FERMT3,ESM1,SYT4,SH3BP1,DCSTAMP,LPXN,HEXB,EYA4,ALOX5,CCL2,HMGA2,NFATC2,HK2,FMNL1,PDE3B,SALL1,PARVG,ARHGAP22,BARX2,SOX11,C…
GO:BP	cell death	GO:0008219	1.79989e-14	13.7448	2136	1395	242	21118	IL1B,IL1RN,CLEC7A,BCL2A1B,HCAR2,HK3,TRPM2,BCL2A1A,SPP1,DNASE1L3,CD36,EGLN3,IL1A,BTK,RUNX3,CLEC5A,TREM2,CAPN3,OSM,NCF1,TNFRSF9,TNFAIP8L2,HCK,AIF1,NCKAP1L,CD200R1,C5AR1,BCL2A1D,C1QA,CCL12,CX3CR1,LGALS3,CCR5,SPI1,TNF,TNFSF14,FCER1G,CORO1A,CXCR2,TYROBP,CARD9,CSF1R,PDCD1,GPNMB,TFAP2B,NEURL1A,TNS4,CCL3,RASSF5,EYA4,HMGA2,PTPRC,EN2,LAPTM5,HK2,CARD11,NLRP1B,SOX11,DUSP9,LGMN,DOCK8,NCF2,GABRB3,PAK3,HCLS1,TN…
GO:BP	biological regulation	GO:0065007	1.86393e-14	13.7296	13374	1395	1029	21118	CD244,IL13RA2,IL1B,SLAMF6,APOB,CST7,LILRB4A,MLXIPL,HPSE,GPR35,C130026I21RIK,NLRP3,ITGAD,TSPAN32,IL1RN,CLEC7A,TIFAB,PKIB,MILR1,TBXAS1,BCL2A1B,ITGAM,SIGLECF,HCAR2,SCIMP,ITGAX,HK3,TRPM2,PIRB,PILRA,5430427O19RIK,CD84,CD300LF,BCL2A1A,HAAO,H2-OA,BTNL2,SLC2A5,CTSS,DMRTB1,P2RY13,LAG3,SAA3,SPP1,DNASE1L3,DOCK2,CSN2,FCGR1,MGARP,ADORA3,HAVCR2,HRH2,PRAM1,CLEC2I,RAC2,CD36,PIK3AP1,EGLN3,ARHGAP9,C3,IL1A,VAV1,CCD…
GO:BP	regulation of leukocyte migration	GO:0002685	1.87411e-14	13.7272	216	1395	54	21118	IL1B,RAC2,IL1A,C3AR1,CCL4,TREM2,AIF1,NCKAP1L,CD200R1,C5AR1,CCL12,CCR1,CX3CR1,LGALS3,SPI1,TNFSF14,C5AR2,PTAFR,2610528A11RIK,CXCR2,CD300A,CSF1R,P2RY12,RHOH,CCL3,CCR6,CCL2,SLAMF1,LGMN,DOCK8,PYCARD,CD74,GPR18,ITGB3,PTK2B,ADORA1,CCL5,PGF,CMKLR1,MMP14,MIF,CXCL14,THY1,GPSM3,ADA,EMILIN1,RIPK3,CAMK1D,SERPINE1,CD9,P2RX4,LYN,RHOG,SMPD3
GO:BP	response to other organism	GO:0051707	2.23733e-14	13.6503	1562	1395	192	21118	CD244,IL1B,SLAMF6,APOB,LILRB4A,NLRP3,TSPAN32,CLEC7A,SCIMP,ITGAX,5430427O19RIK,LAG3,SAA3,FCGR1,HAVCR2,CD36,C3,IL1A,VAV1,CCDC88B,BTK,CLEC5A,C1QC,CCL4,TREM2,TLR7,CD68,LY86,NCF1,TNFAIP8L2,FCGR4,HCK,SLA,CD86,AIF1,C5AR1,TREM1,WDFY4,C1QA,LY9,CCL12,C1QB,CCR1,BANK1,CX3CR1,LGALS3,SLC11A1,PLD4,TLR13,CD180,SPI1,AA467197,PTPN6,RGS1,TNF,FCER1G,PTAFR,CNR2,2610528A11RIK,CD37,CORO1A,CD52,WAS,TYROBP,CARD9,CSF1R,FG…
GO:BP	negative regulation of cell activation	GO:0050866	2.42419e-14	13.6154	210	1395	53	21118	IL13RA2,CST7,LILRB4A,TSPAN32,MILR1,CD84,CD300LF,LAG3,HAVCR2,BTK,RUNX3,TNFRSF13B,TNFAIP8L2,CD86,BANK1,SPI1,PTPN6,CNR2,CD37,TYROBP,LST1,CD300A,GPNMB,FGR,LAPTM5,H2-AA,SOX11,NFKBID,SLFN1,CD74,PLA2G2D,CDKN2A,CEBPB,FGL2,PAG1,CD80,UBASH3B,PDGFRA,AXL,IL4RA,CD276,GRN,INPP5D,PRKCD,C1QTNF1,APOE,EMILIN1,CD9,LOXL3,DTX1,SAMSN1,LYN,TNFRSF21
GO:BP	response to external biotic stimulus	GO:0043207	2.74491e-14	13.5615	1565	1395	192	21118	CD244,IL1B,SLAMF6,APOB,LILRB4A,NLRP3,TSPAN32,CLEC7A,SCIMP,ITGAX,5430427O19RIK,LAG3,SAA3,FCGR1,HAVCR2,CD36,C3,IL1A,VAV1,CCDC88B,BTK,CLEC5A,C1QC,CCL4,TREM2,TLR7,CD68,LY86,NCF1,TNFAIP8L2,FCGR4,HCK,SLA,CD86,AIF1,C5AR1,TREM1,WDFY4,C1QA,LY9,CCL12,C1QB,CCR1,BANK1,CX3CR1,LGALS3,SLC11A1,PLD4,TLR13,CD180,SPI1,AA467197,PTPN6,RGS1,TNF,FCER1G,PTAFR,CNR2,2610528A11RIK,CD37,CORO1A,CD52,WAS,TYROBP,CARD9,CSF1R,FG…
GO:BP	interleukin-6 production	GO:0032635	3.19492e-14	13.4955	163	1395	46	21118	IL1B,CLEC7A,SCIMP,HAVCR2,CD36,IL1A,TREM2,TLR7,AIF1,NCKAP1L,CD200R1,BANK1,CCR5,PTPN6,TNF,C5AR2,FCER1G,PTAFR,TYROBP,CARD9,TICAM2,POU2F2,IL1RL2,LAPTM5,TLR9,IL16,SLAMF1,SIRPA,PYCARD,CD74,TLR1,RAB7B,ARRB2,TLR2,CEBPB,SYK,IL17RA,P2RX7,INPP5D,TMEM106A,TLR4,CYBA,F2R,TLR6,NLRX1,GBA
GO:BP	regulation of interleukin-6 production	GO:0032675	3.19492e-14	13.4955	163	1395	46	21118	IL1B,CLEC7A,SCIMP,HAVCR2,CD36,IL1A,TREM2,TLR7,AIF1,NCKAP1L,CD200R1,BANK1,CCR5,PTPN6,TNF,C5AR2,FCER1G,PTAFR,TYROBP,CARD9,TICAM2,POU2F2,IL1RL2,LAPTM5,TLR9,IL16,SLAMF1,SIRPA,PYCARD,CD74,TLR1,RAB7B,ARRB2,TLR2,CEBPB,SYK,IL17RA,P2RX7,INPP5D,TMEM106A,TLR4,CYBA,F2R,TLR6,NLRX1,GBA
GO:BP	cell morphogenesis	GO:0000902	3.42322e-14	13.4656	1056	1395	145	21118	HRH2,RAC2,RUNX3,HCK,NCKAP1L,CCL12,CCR5,SPI1,PTPN6,ARHGAP4,CORO1A,LST1,CSF1R,RELN,SLITRK4,FGR,GAP43,RHOH,FMN1,CCL3,FERMT3,SYT4,LPXN,HEXB,CCL2,FMNL1,PARVG,KIF5A,TUBB3,SLITRK5,PAK3,NYAP1,POSTN,CDH19,CCL11,RNF157,SYT1,MYO7A,UNC13D,DCX,MYO16,CNTN4,ITGB3,CRMP1,SLITRK2,DCC,ATP8A2,HPN,DSCAM,ETV4,BCL11B,SCN1B,PTK2B,CD44,WNT7B,PCDH15,CSPG5,SEMA4A,PTPRO,CDH24,EGR2,PTPRZ1,TUBB2B,ZFP385A,ARAP1,ABI3,CAMK2A,KIF…
GO:BP	positive regulation of molecular function	GO:0044093	5.7013e-14	13.244	1678	1395	201	21118	IL1B,NLRP3,IL1RN,CLEC7A,PKIB,CTSS,DOCK2,FCGR1,CD36,EGLN3,ARHGAP9,VAV1,CCL4,TREM2,CAPN3,NCF1,CD86,NCKAP1L,FGD2,CCL12,ITGB2,CX3CR1,P2RY6,SLC11A1,RGS1,TNF,PTAFR,ARHGAP4,PLEK,RASAL3,CARD9,CD300A,CSF1R,RELN,KCNE3,FGR,NEURL1A,CCL3,SH3BP1,CCL6,GPR65,RGS10,ALOX5,CCL2,HMGA2,PTPRC,LAPTM5,LCP2,GPR55,ARHGAP22,CARD11,NLRP1B,TLR9,LGMN,DOCK8,HCN1,PIK3R5,TTBK1,PAK3,HCLS1,PYCARD,TAGAP,RAP1GAP2,RASA4,CD74,SPON1,CC…
GO:BP	positive regulation of cell migration	GO:0030335	6.71985e-14	13.1726	557	1395	94	21118	IL1B,CLEC7A,ITGAX,RAC2,IL1A,C3AR1,CCL4,TREM2,AIF1,NCKAP1L,C5AR1,CCL12,CCR1,CX3CR1,LGALS3,P2RY6,SPI1,TNFSF14,PTAFR,CORO1A,CXCR2,CSF1R,RELN,P2RY12,GPNMB,FGR,CCL3,FERMT3,CCR6,CCL2,PTPRC,SLAMF1,LGMN,DOCK8,PAK3,PYCARD,POSTN,PIK3CD,CD74,CCL11,ONECUT2,ITGB3,CXCL16,MYO5A,PLAU,PTK2B,PIK3CG,CCL5,SEMA4A,PTPRZ1,PDGFRA,PGF,LRP1,CDH13,NOX4,SEMA3E,MMP2,SEMA4D,CMKLR1,GRN,MMP14,MIF,CXCL14,TGFBR1,ACVR1B,CXCR4,THY1…
GO:BP	generation of neurons	GO:0048699	7.19431e-14	13.143	1636	1395	197	21118	IL1B,RAC2,C3,RUNX3,NCKAP1L,C1QA,CX3CR1,CCR5,TNF,ARHGAP4,EMX2,LST1,CSF1R,RELN,SLITRK4,GAP43,NEURL1A,RHOH,FMN1,SYT4,BHLHE41,HMGA2,EN2,SEZ6,SOX11,SALL3,KIF5A,TUBB3,HCN1,SLITRK5,GABRB3,PAK3,TLE6,RAP1GAP2,NYAP1,POSTN,CCL11,ONECUT2,RNF157,SYT1,ATCAY,MYO7A,DCX,MYO16,CNTN4,TLR2,CRMP1,SLITRK2,BRINP3,DCC,ATP8A2,CEBPB,AREG,DSCAM,ARSB,PTPN5,ETV4,ZFP536,BCL11B,GPRIN1,CTSZ,SCN1B,PTK2B,SYN1,WNT7B,LGI4,CCL5,RGS2…
GO:BP	leukocyte cell-cell adhesion	GO:0007159	8.7303e-14	13.059	340	1395	69	21118	CD244,IL1B,NLRP3,BTNL2,LAG3,HAVCR2,RAC2,IL1A,CCDC88B,RUNX3,TNFAIP8L2,CD86,AIF1,NCKAP1L,ITGB2,CX3CR1,TNFSF13B,PTPN6,TNF,TNFSF14,PTAFR,CORO1A,RASAL3,ITGAL,CD300A,SASH3,GPNMB,RHOH,FERMT3,IL1RL2,ALOX5,CCL2,PTPRC,LAPTM5,CARD11,H2-AA,SLAMF1,SIRPA,DOCK8,GCNT1,NFKBID,PYCARD,SLFN1,CD74,PLA2G2D,CDKN2A,CD83,CEBPB,NT5E,FGL2,SYK,ADD2,CD44,PAG1,CD80,CCL5,LGALS1,SEMA4D,IL4RA,CD276,THY1,ADA,LOXL3,BLM,DTX1,SOX4,T…
GO:BP	regulation of immune response	GO:0050776	9.60014e-14	13.0177	811	1395	120	21118	IL13RA2,IL1B,SLAMF6,LILRB4A,NLRP3,TSPAN32,5430427O19RIK,CD84,BTNL2,LAG3,FCGR1,HAVCR2,PRAM1,CLEC2I,RAC2,C3,VAV1,BTK,C3AR1,C1QC,TREM2,LAT2,FCGR4,FYB,NCKAP1L,C5AR1,BCL2A1D,C1QA,C1QB,CCR1,ADCY7,TNFSF13B,SLC11A1,CD48,THEMIS2,SPI1,BLNK,PTPN6,TNF,C5AR2,FCER1G,PTAFR,CD37,WAS,TYROBP,CARD9,CD300A,SASH3,PDCD1,ERMAP,FGR,MYO1G,ALOX15,CD22,HCST,LPXN,PTPRC,NFATC2,LAPTM5,LCP2,OAS3,KLRB1B,C2,CARD11,TLR9,SLAMF1,NF…
GO:BP	regulation of ion transport	GO:0043269	9.66333e-14	13.0149	722	1395	111	21118	IL1B,GPR35,IL1RN,CD84,CTSS,HRH2,IL1A,CCL4,TREM2,CAPN3,HVCN1,CCL12,CCR1,LGALS3,P2RY6,CACNA1S,PTPN6,TNF,PTAFR,CYP4F18,CORO1A,CD300A,RELN,P2RY12,KCNE3,CCL3,FXYD7,CHRM3,SYT4,CNIH2,CACNG8,SYT6,ALOX5,CCL2,KCND1,CYBB,TLR9,SCN8A,RAB3B,IL16,HCN1,CNIH3,KCNK13,SCN11A,SHISA8,SYT1,PRKG2,STAC2,ARRB2,WNK3,ITGB3,MYO5A,CEBPB,RGS7,CACNG5,CD63,SCN1B,SYK,PTK2B,KCNIP1,KCNAB2,KCNG2,PIK3CG,ADORA1,CCL5,RGS2,UBASH3B,NETO…
GO:BP	biological process involved in interspecies interaction between organisms	GO:0044419	1.08561e-13	12.9643	1688	1395	201	21118	CD244,IL1B,SLAMF6,APOB,LILRB4A,NLRP3,TSPAN32,CLEC7A,SCIMP,ITGAX,5430427O19RIK,CD300LF,LAG3,SAA3,FCGR1,HAVCR2,CD36,C3,IL1A,VAV1,CCDC88B,BTK,CLEC5A,C1QC,CCL4,TREM2,TLR7,CD68,LY86,NCF1,TNFAIP8L2,FCGR4,HCK,SLA,CD86,AIF1,C5AR1,TREM1,WDFY4,C1QA,LY9,CCL12,C1QB,CCR1,BANK1,CX3CR1,LGALS3,SLC11A1,PLD4,TLR13,CCR5,CD180,SPI1,AA467197,PTPN6,RGS1,TNF,FCER1G,PTAFR,CNR2,2610528A11RIK,CD37,CORO1A,CD52,WAS,TYROBP,C…
GO:BP	leukocyte differentiation	GO:0002521	1.67529e-13	12.7759	574	1395	95	21118	IL1B,SLAMF6,NLRP3,TRPM2,PIRB,CD300LF,H2-OA,LAG3,DOCK2,CLEC2I,IL1A,VAV1,BTK,RUNX3,C1QC,TREM2,NCKAP1L,BCL2A1D,LY9,CCR1,TNFSF13B,SPI1,PTPN6,TNF,FCER1G,IKZF1,TYROBP,SASH3,CSF1R,CD8A,RHOH,CCL3,CCR6,DCSTAMP,POU2F2,IL1RL2,PTPRC,GPR55,IRF8,CARD11,H2-AA,CD101,TLR9,SLAMF1,HCLS1,BATF3,NFKBID,CD79B,CD74,PLA2G2D,MAFB,GPR18,CEBPA,ITGB3,PLCL2,CDKN2A,CD83,CEBPB,BCL11B,FGL2,SYK,PTK2B,NFAM1,CCL5,CMTM7,LGALS1,SEMA4…
GO:BP	synapse organization	GO:0050808	1.81055e-13	12.7422	474	1395	84	21118	PPFIA4,C3,C1QC,TREM2,C5AR1,C1QA,C1QB,CX3CR1,TNF,RELN,SLITRK4,GAP43,NEURL1A,LGI2,IL10RA,SEZ6,ARHGAP22,SHISA7,LGMN,SLITRK5,GABRB3,PAK3,IGSF21,SLITRK2,LRRTM3,MYO5A,DSCAM,ADD2,ERC2,SYN1,WNT7B,SEMA4A,PTPRO,INA,SDK2,ABI3,CAMK2B,SPTBN2,SEMA3E,RAPSN,NPTX1,ANK3,SEMA4D,LHFPL4,LRRC4,PLXNB2,CDK5R1,PPP1R9A,TANC2,RAB39B,ACHE,ETV5,ARHGAP33,CLSTN3,WASF1,NTRK3,ELFN1,BCAN,APOE,EPHB2,MAPT,DLGAP1,NEGR1,DBN1,NLGN3,LR…
GO:BP	phosphorus metabolic process	GO:0006793	2.78188e-13	12.5557	2832	1395	295	21118	CD244,IL1B,DYRK4,LILRB4A,MLXIPL,IL1RN,CLEC7A,PKIB,HK3,PIRB,HAAO,SAA3,FCGR1,PTPN7,RAC2,CD36,C3,BTK,RUNX3,TREM2,TLR7,OSM,NCF1,HCK,SLA,CD86,AIF1,NCKAP1L,C5AR1,FGD2,ADCY7,BANK1,CX3CR1,P2RY6,SLC11A1,LPCAT2,PTPN6,TNF,PTAFR,PLEK,MAP3K19,PTPRN,SLC37A2,CD300A,LILR4B,PLCB2,CSF1R,RELN,GPNMB,FGR,TMEM119,ALOX15,NEURL1A,RHOH,CCL3,DUSP27,HCST,HEXB,SLC7A14,EYA4,HMGA2,PTPRC,HK2,LCP2,AK1,LRGUK,MATK,TLR9,SIRPA,DUSP…
GO:BP	leukocyte proliferation	GO:0070661	2.78922e-13	12.5545	339	1395	68	21118	CD244,IL1B,SLAMF6,LILRB4A,ITGAD,BTNL2,DOCK2,HAVCR2,CLEC2I,RAC2,IL1A,CCDC88B,BTK,TREM2,TNFRSF13B,CD86,AIF1,NCKAP1L,CCL12,LGALS3,TNFSF13B,SLC11A1,CD180,PTPN6,CORO1A,RASAL3,ITGAL,TYROBP,LST1,CD300A,SASH3,CSF1R,GPNMB,PTPRC,NFATC2,LAPTM5,CARD11,H2-AA,SOX11,TLR9,SLAMF1,DOCK8,PYCARD,SLFN1,CD74,PLA2G2D,EBI3,ELF4,PLCL2,CDKN2A,CEBPB,SYK,CD80,CCL5,CD276,P2RX7,MIF,INPP5D,PRKCD,EPHB2,ADA,RIPK3,TLR4,BLM,LYN,TN…
GO:BP	positive regulation of locomotion	GO:0040017	3.04106e-13	12.517	598	1395	97	21118	IL1B,CLEC7A,ITGAX,RAC2,IL1A,C3AR1,CCL4,TREM2,AIF1,NCKAP1L,C5AR1,CCL12,CCR1,CX3CR1,LGALS3,P2RY6,SPI1,TNFSF14,PTAFR,CORO1A,CXCR2,CSF1R,RELN,P2RY12,GPNMB,FGR,CCL3,FERMT3,CCR6,CCL2,PTPRC,IL16,SLAMF1,LGMN,DOCK8,PAK3,PYCARD,POSTN,PIK3CD,CD74,CCL11,ONECUT2,ITGB3,CXCL16,MYO5A,DSCAM,PLAU,PTK2B,PIK3CG,CCL5,SEMA4A,PTPRZ1,PDGFRA,PGF,LRP1,CDH13,NOX4,SEMA3E,MMP2,SEMA4D,CMKLR1,GRN,MMP14,MIF,CXCL14,TGFBR1,ACVR1B…
GO:BP	positive regulation of cellular component movement	GO:0051272	3.04106e-13	12.517	598	1395	97	21118	IL1B,CLEC7A,ITGAX,RAC2,IL1A,C3AR1,CCL4,TREM2,AIF1,NCKAP1L,C5AR1,CCL12,CCR1,CX3CR1,LGALS3,P2RY6,SPI1,TNFSF14,PTAFR,CORO1A,CXCR2,CSF1R,RELN,P2RY12,GPNMB,FGR,CCL3,FERMT3,CCR6,CCL2,PTPRC,SLAMF1,LGMN,DOCK8,PAK3,PYCARD,POSTN,PIK3CD,CD74,CCL11,ONECUT2,ITGB3,CXCL16,MYO5A,PLAU,PTK2B,PIK3CG,CCL5,SEMA4A,PTPRZ1,TUBB2B,PDGFRA,PGF,LRP1,CDH13,NOX4,SEMA3E,MMP2,SEMA4D,CMKLR1,GRN,MMP14,MIF,CXCL14,TGFBR1,ACVR1B,CXC…
GO:BP	positive regulation of cell motility	GO:2000147	3.75374e-13	12.4255	581	1395	95	21118	IL1B,CLEC7A,ITGAX,RAC2,IL1A,C3AR1,CCL4,TREM2,AIF1,NCKAP1L,C5AR1,CCL12,CCR1,CX3CR1,LGALS3,P2RY6,SPI1,TNFSF14,PTAFR,CORO1A,CXCR2,CSF1R,RELN,P2RY12,GPNMB,FGR,CCL3,FERMT3,CCR6,CCL2,PTPRC,SLAMF1,LGMN,DOCK8,PAK3,PYCARD,POSTN,PIK3CD,CD74,CCL11,ONECUT2,ITGB3,CXCL16,MYO5A,PLAU,PTK2B,PIK3CG,CCL5,SEMA4A,PTPRZ1,PDGFRA,PGF,LRP1,CDH13,NOX4,SEMA3E,MMP2,SEMA4D,CMKLR1,GRN,MMP14,MIF,CXCL14,TGFBR1,ACVR1B,CXCR4,THY1…
GO:BP	ion transport	GO:0006811	4.17904e-13	12.3789	1572	1395	189	21118	IL1B,GPR35,IL1RN,TRPM2,CD84,CTSS,HRH2,CD36,IL1A,BTK,CCL4,TREM2,CAPN3,HVCN1,ATP1A3,CCL12,CCR1,LGALS3,P2RY6,CACNA1S,SLC11A1,CCR5,COX6A2,AA467197,PTPN6,TNF,FCER1G,PTAFR,CYP4F18,CORO1A,SLC37A2,CD300A,RELN,SLC16A3,P2RY12,KCNE3,SLCO4A1,CCL3,FXYD7,CHRM3,SYT4,CNIH2,CACNG8,SYT6,ALOX5,CCL2,KCND1,PTPRC,CYBB,TLR9,SCN8A,RAB3B,IL16,SLC46A1,HCN1,KCNK10,GABRB3,CNIH3,KCNK13,SCN11A,SLC7A7,PLA2G2D,SHISA8,SLC39A14,S…
GO:BP	lymphocyte proliferation	GO:0046651	4.37191e-13	12.3593	309	1395	64	21118	CD244,IL1B,SLAMF6,LILRB4A,ITGAD,BTNL2,DOCK2,HAVCR2,CLEC2I,RAC2,IL1A,CCDC88B,BTK,TNFRSF13B,CD86,AIF1,NCKAP1L,LGALS3,TNFSF13B,SLC11A1,CD180,PTPN6,CORO1A,RASAL3,ITGAL,TYROBP,LST1,CD300A,SASH3,GPNMB,PTPRC,NFATC2,LAPTM5,CARD11,H2-AA,SOX11,TLR9,SLAMF1,DOCK8,PYCARD,SLFN1,CD74,PLA2G2D,EBI3,ELF4,PLCL2,CDKN2A,CEBPB,SYK,CD80,CCL5,CD276,P2RX7,MIF,INPP5D,PRKCD,EPHB2,ADA,RIPK3,TLR4,BLM,LYN,TNFRSF21,ICOSL
GO:BP	phosphate-containing compound metabolic process	GO:0006796	5.5697e-13	12.2542	2809	1395	292	21118	CD244,IL1B,DYRK4,LILRB4A,MLXIPL,IL1RN,CLEC7A,PKIB,HK3,PIRB,HAAO,SAA3,FCGR1,PTPN7,RAC2,CD36,C3,BTK,RUNX3,TREM2,TLR7,OSM,NCF1,HCK,SLA,CD86,AIF1,NCKAP1L,C5AR1,FGD2,ADCY7,BANK1,CX3CR1,P2RY6,SLC11A1,LPCAT2,PTPN6,TNF,PTAFR,PLEK,MAP3K19,PTPRN,SLC37A2,CD300A,LILR4B,PLCB2,CSF1R,RELN,GPNMB,FGR,TMEM119,ALOX15,NEURL1A,RHOH,CCL3,DUSP27,HCST,HEXB,SLC7A14,EYA4,HMGA2,PTPRC,HK2,LCP2,AK1,LRGUK,MATK,TLR9,SIRPA,DUSP…
GO:BP	regulation of intracellular signal transduction	GO:1902531	6.00964e-13	12.2212	1589	1395	190	21118	IL1B,HPSE,GPR35,NLRP3,IL1RN,CLEC7A,SCIMP,DOCK2,HAVCR2,CD36,PIK3AP1,C3,IL1A,CCL4,TREM2,TLR7,CAPN3,OSM,NCF1,CD86,F2RL2,C5AR1,FGD2,CCL12,CCR1,BANK1,CX3CR1,P2RY6,UNC5CL,TLR13,SPI1,PTPN6,TNF,TNFSF14,C5AR2,RASAL3,ITGAL,CARD9,CD300A,PSD4,CSF1R,RELN,P2RY12,GPNMB,FGR,ALOX15,TICAM2,CD8A,RHOH,CCL3,SH3BP1,CCL6,HCST,CCL2,PTPRC,LAPTM5,SEZ6,GPR55,CARD11,SOX11,TLR9,SLAMF1,SIRPA,DUSP9,PIK3R5,PAK3,HCLS1,DGKI,NFKBI…
GO:BP	mononuclear cell proliferation	GO:0032943	7.18755e-13	12.1434	312	1395	64	21118	CD244,IL1B,SLAMF6,LILRB4A,ITGAD,BTNL2,DOCK2,HAVCR2,CLEC2I,RAC2,IL1A,CCDC88B,BTK,TNFRSF13B,CD86,AIF1,NCKAP1L,LGALS3,TNFSF13B,SLC11A1,CD180,PTPN6,CORO1A,RASAL3,ITGAL,TYROBP,LST1,CD300A,SASH3,GPNMB,PTPRC,NFATC2,LAPTM5,CARD11,H2-AA,SOX11,TLR9,SLAMF1,DOCK8,PYCARD,SLFN1,CD74,PLA2G2D,EBI3,ELF4,PLCL2,CDKN2A,CEBPB,SYK,CD80,CCL5,CD276,P2RX7,MIF,INPP5D,PRKCD,EPHB2,ADA,RIPK3,TLR4,BLM,LYN,TNFRSF21,ICOSL
GO:BP	cellular process	GO:0009987	7.34676e-13	12.1339	17828	1395	1277	21118	CD244,IL13RA2,IL1B,ABCC3,SLAMF6,DYRK4,APOB,CST7,LILRB4A,MLXIPL,HPSE,GPR35,C130026I21RIK,NLRP3,ITGAD,TSPAN32,IL1RN,B3GNT7,CLEC7A,TIFAB,PKIB,PPFIA4,MILR1,TBXAS1,BCL2A1B,ITGAM,SIGLECF,HCAR2,SCIMP,ITGAX,HK3,TRPM2,PIRB,PILRA,CD33,5430427O19RIK,CD84,HAL,CD300LF,BCL2A1A,HAAO,H2-OA,BTNL2,SLC2A5,CTSS,DMRTB1,P2RY13,LAG3,SAA3,SPP1,DNASE1L3,DOCK2,CSN2,FCGR1,MGARP,EMILIN2,PTPN7,ADORA3,GALNT3,HAVCR2,HRH2,PRAM1…
GO:BP	hemopoiesis	GO:0030097	1.09394e-12	11.961	909	1395	127	21118	IL1B,SLAMF6,NLRP3,TRPM2,PIRB,CD300LF,H2-OA,LAG3,DOCK2,CLEC2I,IL1A,VAV1,BTK,ARL11,RUNX3,CLEC5A,C1QC,TREM2,TNFRSF13B,NCKAP1L,BCL2A1D,LY9,CCR1,TNFSF13B,PLD4,SPI1,CSF3R,PTPN6,TNF,FCER1G,PLEK,IKZF1,TYROBP,SASH3,CSF1R,CD8A,RHOH,CCL3,CCR6,DCSTAMP,POU2F2,IL1RL2,PTPRC,GPR55,IRF8,CARD11,H2-AA,CD101,TLR9,SLAMF1,SIRPA,HCLS1,BATF3,NFKBID,FLT3,CD79B,CD74,PLA2G2D,MAFB,GPR18,RAB7B,CEBPA,ITGB3,PLCL2,CDKN2A,CD83,C…
GO:BP	signaling	GO:0023052	1.18261e-12	11.9272	7227	1395	618	21118	IL13RA2,IL1B,LILRB4A,MLXIPL,HPSE,GPR35,NLRP3,ITGAD,TSPAN32,IL1RN,CLEC7A,TIFAB,MILR1,BCL2A1B,ITGAM,HCAR2,SCIMP,ITGAX,TRPM2,PIRB,PILRA,5430427O19RIK,CD300LF,BCL2A1A,BTNL2,P2RY13,LAG3,SAA3,SPP1,DOCK2,FCGR1,ADORA3,HAVCR2,HRH2,PRAM1,CLEC2I,RAC2,CD36,PIK3AP1,ARHGAP9,C3,IL1A,VAV1,BTK,C3AR1,RUNX3,CCL4,TREM2,TLR7,CAPN3,CD68,LAT2,OSM,LPAR5,RAB39,LY86,NCF1,FCGR4,HCK,SLA,CD86,GPR84,AIF1,F2RL2,AFP,ATP1A3,FYB,…
GO:BP	regulation of lymphocyte proliferation	GO:0050670	1.21073e-12	11.917	221	1395	52	21118	CD244,IL1B,BTNL2,HAVCR2,CLEC2I,RAC2,IL1A,CCDC88B,BTK,TNFRSF13B,CD86,AIF1,NCKAP1L,LGALS3,TNFSF13B,PTPN6,CORO1A,RASAL3,ITGAL,TYROBP,LST1,CD300A,SASH3,GPNMB,PTPRC,NFATC2,LAPTM5,CARD11,H2-AA,SOX11,TLR9,SLAMF1,PYCARD,SLFN1,CD74,PLA2G2D,CDKN2A,CEBPB,SYK,CD80,CCL5,CD276,MIF,INPP5D,EPHB2,ADA,RIPK3,TLR4,BLM,LYN,TNFRSF21,ICOSL
GO:BP	regulation of cell-cell adhesion	GO:0022407	1.33142e-12	11.8757	418	1395	76	21118	CD244,IL1B,NLRP3,IL1RN,BTNL2,LAG3,HAVCR2,IL1A,CCDC88B,RUNX3,TNFAIP8L2,CD86,AIF1,NCKAP1L,TNFSF13B,CCR5,SPI1,PTPN6,TNF,TNFSF14,PTAFR,CORO1A,RASAL3,ITGAL,CD300A,SASH3,GPNMB,ALOX15,RHOH,FERMT3,IL1RL2,ALOX5,CCL2,PTPRC,LAPTM5,CARD11,H2-AA,SLAMF1,SIRPA,DOCK8,NFKBID,PYCARD,SLFN1,CD74,PLA2G2D,CDKN2A,CD83,CEBPB,FGL2,SYK,CD44,PAG1,SOX2,CD80,CCL5,LGALS1,UBASH3B,ADAM19,ANK3,IL4RA,CD276,PRKCD,THY1,C1QTNF1,RAP1…
GO:BP	regulation of cell differentiation	GO:0045595	1.47291e-12	11.8318	1649	1395	194	21118	IL1B,APOB,NLRP3,CLEC7A,H2-OA,LAG3,CLEC2I,CD36,IL1A,RUNX3,C1QC,TREM2,CAPN3,NCKAP1L,CCR1,CX3CR1,CCR5,SPI1,CSF3R,PTPN6,TNF,TNFSF14,ARHGAP4,CELA1,TYROBP,SASH3,CSF1R,RELN,P2RY12,TFAP2B,TMEM119,FBN2,NEURL1A,RHOH,CCL3,SYT4,DCSTAMP,BHLHE41,IL1RL2,ALOX5,HMGA2,PTPRC,NFATC2,GPR55,CARD11,H2-AA,SOX11,CD101,TLR9,PAK3,HCLS1,NFKBID,TLE6,POSTN,CD74,MAFB,CCL11,CCL9,RAB7B,UNC13D,DCX,CEBPA,CNTN4,ARRB2,TLR2,ITGB3,BRI…
GO:BP	regulation of mononuclear cell proliferation	GO:0032944	2.21096e-12	11.6554	224	1395	52	21118	CD244,IL1B,BTNL2,HAVCR2,CLEC2I,RAC2,IL1A,CCDC88B,BTK,TNFRSF13B,CD86,AIF1,NCKAP1L,LGALS3,TNFSF13B,PTPN6,CORO1A,RASAL3,ITGAL,TYROBP,LST1,CD300A,SASH3,GPNMB,PTPRC,NFATC2,LAPTM5,CARD11,H2-AA,SOX11,TLR9,SLAMF1,PYCARD,SLFN1,CD74,PLA2G2D,CDKN2A,CEBPB,SYK,CD80,CCL5,CD276,MIF,INPP5D,EPHB2,ADA,RIPK3,TLR4,BLM,LYN,TNFRSF21,ICOSL
GO:BP	immune system development	GO:0002520	2.86966e-12	11.5422	1015	1395	136	21118	IL1B,SLAMF6,NLRP3,TRPM2,PIRB,CD300LF,H2-OA,LAG3,DOCK2,HAVCR2,CLEC2I,IL1A,VAV1,BTK,C3AR1,ARL11,RUNX3,CLEC5A,C1QC,TREM2,TNFRSF13B,CD86,NCKAP1L,BCL2A1D,LY9,CCR1,TNFSF13B,PLD4,SPI1,CSF3R,PTPN6,TNF,FCER1G,PLEK,IKZF1,TYROBP,SASH3,CSF1R,PDCD1,CD8A,RHOH,CCL3,CCR6,DCSTAMP,POU2F2,IL1RL2,PTPRC,GPR55,IRF8,CARD11,H2-AA,CD101,TLR9,SLAMF1,SIRPA,HCLS1,BATF3,NFKBID,FLT3,CD79B,CD74,PLA2G2D,MAFB,GPR18,RAB7B,CEBPA,I…
GO:BP	homeostatic process	GO:0042592	3.84247e-12	11.4154	1922	1395	216	21118	IL1B,APOB,LILRB4A,MLXIPL,GPR35,IL1RN,PKIB,TBXAS1,HCAR2,HK3,TRPM2,PIRB,5430427O19RIK,BCL2A1A,HAAO,CTSS,SPP1,RAC2,CD36,IL1A,C3AR1,TREM2,CAPN3,HVCN1,RAB39,TNFRSF13B,FCGR4,F2RL2,ATP1A3,NCKAP1L,C5AR1,GNA15,CCR1,CX3CR1,TNFSF13B,P2RY6,SLC11A1,CCR5,SPI1,GNG3,PTPN6,TNF,C5AR2,FCER1G,CORO1A,IKZF1,CD52,CXCR2,SASH3,CSF1R,TFAP2B,PTGS1,TMEM119,CCL3,CCR6,DCSTAMP,HEXB,ALOX5,CCL2,RAB20,PTPRC,HK2,GPR55,CARD11,TLR9,…
GO:BP	neuron differentiation	GO:0030182	4.40088e-12	11.3565	1472	1395	177	21118	IL1B,RAC2,C3,RUNX3,NCKAP1L,C1QA,CCR5,ARHGAP4,EMX2,LST1,CSF1R,RELN,SLITRK4,GAP43,NEURL1A,RHOH,FMN1,SYT4,EN2,SEZ6,SOX11,SALL3,KIF5A,TUBB3,HCN1,SLITRK5,GABRB3,PAK3,TLE6,RAP1GAP2,NYAP1,POSTN,ONECUT2,RNF157,SYT1,ATCAY,MYO7A,DCX,MYO16,CNTN4,CRMP1,SLITRK2,BRINP3,DCC,ATP8A2,CEBPB,AREG,DSCAM,ARSB,PTPN5,ETV4,ZFP536,BCL11B,GPRIN1,CTSZ,SCN1B,PTK2B,SYN1,WNT7B,LGI4,CCL5,RGS2,PCDH15,LGALS1,SEMA4A,PTPRO,EGR2,PTP…
GO:BP	regulation of leukocyte proliferation	GO:0070663	4.52868e-12	11.344	243	1395	54	21118	CD244,IL1B,BTNL2,HAVCR2,CLEC2I,RAC2,IL1A,CCDC88B,BTK,TNFRSF13B,CD86,AIF1,NCKAP1L,CCL12,LGALS3,TNFSF13B,PTPN6,CORO1A,RASAL3,ITGAL,TYROBP,LST1,CD300A,SASH3,CSF1R,GPNMB,PTPRC,NFATC2,LAPTM5,CARD11,H2-AA,SOX11,TLR9,SLAMF1,PYCARD,SLFN1,CD74,PLA2G2D,CDKN2A,CEBPB,SYK,CD80,CCL5,CD276,MIF,INPP5D,EPHB2,ADA,RIPK3,TLR4,BLM,LYN,TNFRSF21,ICOSL
GO:BP	phosphorylation	GO:0016310	4.85452e-12	11.3139	1938	1395	217	21118	IL1B,DYRK4,LILRB4A,MLXIPL,IL1RN,CLEC7A,PKIB,HK3,SAA3,FCGR1,RAC2,CD36,C3,BTK,RUNX3,TREM2,TLR7,OSM,NCF1,HCK,SLA,CD86,AIF1,NCKAP1L,C5AR1,FGD2,BANK1,CX3CR1,SLC11A1,PTPN6,TNF,MAP3K19,CD300A,LILR4B,CSF1R,RELN,GPNMB,FGR,TMEM119,NEURL1A,RHOH,CCL3,HCST,HMGA2,PTPRC,HK2,LCP2,AK1,LRGUK,MATK,TLR9,SIRPA,DUSP9,PIK3R5,TTBK1,PAK3,HCLS1,DGKI,INHBB,FLT3,STK32A,PYCARD,SLFN1,PFKFB4,PIK3CD,CD74,TLR1,SLC2A6,PRKG2,DUSP2…
GO:BP	programmed cell death	GO:0012501	5.2425e-12	11.2805	1975	1395	220	21118	IL1B,IL1RN,CLEC7A,BCL2A1B,HCAR2,HK3,BCL2A1A,SPP1,DNASE1L3,EGLN3,IL1A,BTK,RUNX3,CLEC5A,TREM2,CAPN3,OSM,NCF1,TNFRSF9,TNFAIP8L2,HCK,AIF1,NCKAP1L,C5AR1,BCL2A1D,CCL12,CX3CR1,LGALS3,CCR5,SPI1,TNF,TNFSF14,FCER1G,CORO1A,CXCR2,TYROBP,CARD9,CSF1R,PDCD1,TFAP2B,NEURL1A,TNS4,CCL3,RASSF5,EYA4,HMGA2,PTPRC,EN2,LAPTM5,HK2,CARD11,NLRP1B,DUSP9,LGMN,DOCK8,NCF2,GABRB3,PAK3,HCLS1,TNFRSF11B,NFKBID,INHBB,PYCARD,PYGL,PIK…
GO:BP	regulation of biological process	GO:0050789	5.56926e-12	11.2542	12686	1395	975	21118	CD244,IL13RA2,IL1B,SLAMF6,APOB,CST7,LILRB4A,MLXIPL,HPSE,GPR35,C130026I21RIK,NLRP3,ITGAD,TSPAN32,IL1RN,CLEC7A,TIFAB,PKIB,MILR1,TBXAS1,BCL2A1B,ITGAM,SIGLECF,HCAR2,SCIMP,ITGAX,HK3,TRPM2,PIRB,PILRA,5430427O19RIK,CD84,CD300LF,BCL2A1A,H2-OA,BTNL2,CTSS,DMRTB1,P2RY13,LAG3,SAA3,SPP1,DNASE1L3,DOCK2,CSN2,FCGR1,MGARP,ADORA3,HAVCR2,HRH2,PRAM1,CLEC2I,RAC2,CD36,PIK3AP1,EGLN3,ARHGAP9,C3,IL1A,VAV1,CCDC88B,BTK,C3A…
GO:BP	regulation of phosphorus metabolic process	GO:0051174	5.74939e-12	11.2404	1556	1395	184	21118	CD244,IL1B,LILRB4A,MLXIPL,IL1RN,CLEC7A,PKIB,PIRB,FCGR1,RAC2,CD36,C3,TREM2,TLR7,OSM,NCF1,CD86,AIF1,NCKAP1L,C5AR1,FGD2,BANK1,CX3CR1,P2RY6,SLC11A1,PTPN6,TNF,PTAFR,PLEK,CD300A,LILR4B,CSF1R,RELN,GPNMB,FGR,TMEM119,NEURL1A,RHOH,SLC7A14,HMGA2,PTPRC,LCP2,TLR9,SIRPA,DUSP9,PIK3R5,TTBK1,PAK3,HCLS1,INHBB,LACC1,PYCARD,SLFN1,CD74,TLR1,SLC2A6,DUSP26,ARRB2,WNK3,ITGB3,EEF1A2,RSPO1,PPP1R3B,PLCL2,CDKN2A,ANG,HPN,ERBB…
GO:BP	cell projection morphogenesis	GO:0048858	6.32578e-12	11.1989	675	1395	102	21118	RAC2,RUNX3,NCKAP1L,CCR5,ARHGAP4,CSF1R,RELN,SLITRK4,GAP43,RHOH,FMN1,SYT4,KIF5A,TUBB3,SLITRK5,PAK3,NYAP1,POSTN,RNF157,SYT1,DCX,MYO16,CNTN4,ITGB3,CRMP1,SLITRK2,DCC,ATP8A2,DSCAM,ETV4,BCL11B,SCN1B,CD44,WNT7B,CSPG5,SEMA4A,PTPRO,EGR2,PTPRZ1,TUBB2B,ABI3,CAMK2A,KIF5C,PLXNC1,CAMK2B,LRP1,SEMA3E,NPTX1,ANK3,SEMA4D,DAB1,PLXNB2,CDK5R1,MAPK8IP2,PPP1R9A,TANC2,TRPV2,ACHE,RNF165,CXCR4,ARHGAP33,PLEKHO1,THY1,B4GALT6,…
GO:BP	cellular component organization	GO:0016043	6.5647e-12	11.1828	6090	1395	534	21118	IL1B,APOB,GPR35,NLRP3,TSPAN32,CLEC7A,PKIB,PPFIA4,SIGLECF,TRPM2,5430427O19RIK,CTSS,DNASE1L3,DOCK2,FCGR1,MGARP,CLEC2I,RAC2,CD36,C3,IL1A,VAV1,CCDC88B,RUNX3,C1QC,TREM2,CAPN3,OSM,RAB39,STAG3,BIN2,HCK,AIF1,ATP1A3,NCKAP1L,C5AR1,FGD2,C1QA,CCL12,C1QB,CX3CR1,LGALS3,CCR5,LPCAT2,SPI1,CD53,TNF,TNFSF14,FCER1G,ARHGAP4,PLEK,CORO1A,ALOX5AP,WAS,TYROBP,LST1,PTPRN,CD300A,CSF1R,RELN,SLITRK4,P2RY12,CSF2RB,FGR,MYO1G,GA…
GO:BP	regulation of phosphorylation	GO:0042325	8.1253e-12	11.0902	1346	1395	165	21118	IL1B,LILRB4A,MLXIPL,IL1RN,CLEC7A,PKIB,FCGR1,RAC2,CD36,C3,TREM2,TLR7,OSM,NCF1,CD86,AIF1,NCKAP1L,C5AR1,FGD2,BANK1,CX3CR1,SLC11A1,PTPN6,TNF,CD300A,LILR4B,CSF1R,RELN,GPNMB,FGR,TMEM119,NEURL1A,RHOH,HMGA2,PTPRC,LCP2,TLR9,SIRPA,DUSP9,PIK3R5,TTBK1,PAK3,HCLS1,INHBB,PYCARD,SLFN1,CD74,TLR1,SLC2A6,DUSP26,ARRB2,WNK3,ITGB3,EEF1A2,RSPO1,PLCL2,CDKN2A,ANG,ERBB3,AREG,DSCAM,PTPN5,IKBKE,SYK,PTK2B,CD44,PIK3CG,WNT7B,A…
GO:BP	regulation of T cell activation	GO:0050863	8.62485e-12	11.0642	311	1395	62	21118	CD244,IL1B,NLRP3,H2-OA,BTNL2,LAG3,HAVCR2,CLEC2I,RAC2,IL1A,CCDC88B,RUNX3,TNFAIP8L2,CD86,AIF1,NCKAP1L,LGALS3,TNFSF13B,PTPN6,TNFSF14,CORO1A,RASAL3,ITGAL,CD300A,SASH3,GPNMB,RHOH,IL1RL2,CCL2,PTPRC,LAPTM5,CARD11,H2-AA,SLAMF1,SIRPA,DOCK8,NFKBID,PYCARD,SLFN1,CD74,PLA2G2D,CDKN2A,CD83,CEBPB,FGL2,SYK,PAG1,CD80,CCL5,LGALS1,IL4RA,CD276,THY1,ADA,RIPK3,LOXL3,BLM,DTX1,SOX4,FANCA,TNFRSF21,ICOSL
GO:BP	regulation of MAPK cascade	GO:0043408	8.69166e-12	11.0609	708	1395	105	21118	IL1B,IL1RN,CLEC7A,SCIMP,HAVCR2,CD36,C3,IL1A,CCL4,TREM2,OSM,NCF1,C5AR1,FGD2,CCL12,CCR1,BANK1,P2RY6,UNC5CL,TLR13,SPI1,PTPN6,TNF,C5AR2,CARD9,CD300A,CSF1R,GPNMB,ALOX15,CCL3,CCL6,CCL2,PTPRC,LAPTM5,GPR55,TLR9,SLAMF1,SIRPA,DUSP9,PIK3R5,PAK3,DOK2,PYCARD,CD74,CCL11,CCL9,DUSP26,ARRB2,ITGB3,DCC,DOK1,PTPN5,IKBKE,SYK,PTK2B,CD44,SOX2,PIK3CG,WNT7B,CCL5,RGS2,RGS14,PDGFRA,LRP1,NOX4,SHC2,P2RX7,MIF,MAPK8IP2,GADD45G…
GO:BP	cell communication	GO:0007154	8.97394e-12	11.047	7291	1395	618	21118	IL13RA2,IL1B,LILRB4A,MLXIPL,HPSE,GPR35,NLRP3,ITGAD,TSPAN32,IL1RN,CLEC7A,TIFAB,MILR1,BCL2A1B,ITGAM,HCAR2,SCIMP,ITGAX,TRPM2,PIRB,PILRA,5430427O19RIK,CD300LF,BCL2A1A,BTNL2,P2RY13,LAG3,SAA3,SPP1,DOCK2,FCGR1,ADORA3,HAVCR2,HRH2,PRAM1,CLEC2I,RAC2,CD36,PIK3AP1,ARHGAP9,C3,IL1A,VAV1,BTK,C3AR1,RUNX3,CCL4,TREM2,TLR7,CAPN3,CD68,LAT2,OSM,LPAR5,RAB39,LY86,NCF1,FCGR4,HCK,SLA,CD86,GPR84,AIF1,F2RL2,AFP,ATP1A3,FYB,…
GO:BP	regulation of phosphate metabolic process	GO:0019220	1.10383e-11	10.9571	1555	1395	183	21118	CD244,IL1B,LILRB4A,MLXIPL,IL1RN,CLEC7A,PKIB,PIRB,FCGR1,RAC2,CD36,C3,TREM2,TLR7,OSM,NCF1,CD86,AIF1,NCKAP1L,C5AR1,FGD2,BANK1,CX3CR1,P2RY6,SLC11A1,PTPN6,TNF,PTAFR,PLEK,CD300A,LILR4B,CSF1R,RELN,GPNMB,FGR,TMEM119,NEURL1A,RHOH,SLC7A14,HMGA2,PTPRC,LCP2,TLR9,SIRPA,DUSP9,PIK3R5,TTBK1,PAK3,HCLS1,INHBB,LACC1,PYCARD,SLFN1,CD74,TLR1,SLC2A6,DUSP26,ARRB2,WNK3,ITGB3,EEF1A2,RSPO1,PPP1R3B,PLCL2,CDKN2A,ANG,HPN,ERBB…
GO:BP	animal organ development	GO:0048513	1.15972e-11	10.9356	3617	1395	350	21118	IL1B,SLAMF6,HPSE,NLRP3,CRYBA4,TIFAB,TRPM2,PIRB,CD300LF,H2-OA,LAG3,SPP1,DOCK2,CSN2,HRH2,CLEC2I,IL1A,VAV1,BTK,C3AR1,ARL11,RUNX3,CLEC5A,C1QC,TREM2,CAPN3,TNFRSF13B,AIF1,AFP,ATP1A3,NCKAP1L,C5AR1,BCL2A1D,LY9,C1QB,CCR1,CSN3,TNFSF13B,PLD4,SPI1,CSF3R,PTPN6,TNF,FCER1G,PLEK,EMX2,IKZF1,CELA1,CXCR2,TYROBP,SASH3,CSF1R,RELN,P2RY12,GPNMB,TFAP2B,AW551984,FGR,PTGS1,TMEM119,FBN2,ALOX15,NEURL1A,CD8A,RHOH,FMN1,CCL3,C…
GO:BP	negative regulation of leukocyte activation	GO:0002695	1.25284e-11	10.9021	188	1395	46	21118	IL13RA2,CST7,LILRB4A,TSPAN32,MILR1,CD84,CD300LF,LAG3,HAVCR2,BTK,RUNX3,TNFRSF13B,TNFAIP8L2,CD86,BANK1,SPI1,PTPN6,CNR2,CD37,TYROBP,LST1,CD300A,GPNMB,FGR,LAPTM5,H2-AA,SOX11,NFKBID,SLFN1,CD74,PLA2G2D,CDKN2A,CEBPB,FGL2,PAG1,CD80,AXL,IL4RA,CD276,GRN,INPP5D,LOXL3,DTX1,SAMSN1,LYN,TNFRSF21
GO:BP	hematopoietic or lymphoid organ development	GO:0048534	1.78582e-11	10.7482	953	1395	128	21118	IL1B,SLAMF6,NLRP3,TRPM2,PIRB,CD300LF,H2-OA,LAG3,DOCK2,CLEC2I,IL1A,VAV1,BTK,ARL11,RUNX3,CLEC5A,C1QC,TREM2,TNFRSF13B,NCKAP1L,BCL2A1D,LY9,CCR1,TNFSF13B,PLD4,SPI1,CSF3R,PTPN6,TNF,FCER1G,PLEK,IKZF1,TYROBP,SASH3,CSF1R,CD8A,RHOH,CCL3,CCR6,DCSTAMP,POU2F2,IL1RL2,PTPRC,GPR55,IRF8,CARD11,H2-AA,CD101,TLR9,SLAMF1,SIRPA,HCLS1,BATF3,NFKBID,FLT3,CD79B,CD74,PLA2G2D,MAFB,GPR18,RAB7B,CEBPA,ITGB3,PLCL2,CDKN2A,CD83,C…
GO:BP	leukocyte activation involved in immune response	GO:0002366	1.84057e-11	10.735	291	1395	59	21118	CD244,IL13RA2,SLAMF6,LILRB4A,NLRP3,CLEC7A,MILR1,CD84,DNASE1L3,DOCK2,HAVCR2,PRAM1,RAC2,BTK,TREM2,LAT2,LY9,APBB1IP,SLC11A1,CD180,SPI1,FCER1G,PTAFR,CORO1A,ITGAL,TYROBP,CD300A,FGR,CCL3,CCR6,PTPRC,IRF8,SLAMF1,NFKBID,PYCARD,CD74,UNC13D,PLCL2,FGL2,SYK,PTK2B,STXBP2,LGALS1,SEMA4A,CHGA,IL4RA,GRN,LCP1,DOCK11,PLCG2,ADA,TLR4,LOXL3,RAB27A,SLC15A4,KIT,UNG,LYN,ICOSL
GO:BP	cell population proliferation	GO:0008283	2.05033e-11	10.6882	2072	1395	226	21118	CD244,IL1B,SLAMF6,LILRB4A,MLXIPL,HPSE,ITGAD,TSPAN32,CLEC7A,ITGAX,BTNL2,DOCK2,ADORA3,HAVCR2,CLEC2I,RAC2,EGLN3,IL1A,CCDC88B,BTK,C3AR1,RUNX3,TREM2,OSM,NCF1,TNFRSF13B,TNFRSF9,HCK,CD86,AIF1,NCKAP1L,C5AR1,CCL12,HPGDS,CX3CR1,LGALS3,TNFSF13B,P2RY6,SLC11A1,CCR5,CD180,PTPN6,TNF,C5AR2,PTAFR,EMX2,CD37,CORO1A,RASAL3,CELA1,CXCR2,ITGAL,TYROBP,LST1,PTPRN,CD300A,SASH3,CSF1R,GPNMB,TFAP2B,IFI30,PTGS1,TMEM119,NEURL1…
GO:BP	gliogenesis	GO:0042063	2.051e-11	10.688	342	1395	65	21118	IL1B,TREM2,C5AR1,C1QA,CCL12,CX3CR1,TNF,CSF1R,RELN,P2RY12,GAP43,CCL3,HEXB,CCL2,HMGA2,SOX11,DCX,PENK,TLR2,ERBB3,AREG,PTK2B,LGI4,CSPG5,EGR2,PTPRZ1,ZFP488,SOX10,NKX2-2,LRP1,BIN1,GRN,MMP14,POU3F1,DAB1,CDK5R1,NRROS,ETV5,LAMB1,B4GALT6,NTRK3,DNER,OLIG2,LINGO1,GPC1,NLGN3,OLIG1,TLR4,CD9,TRF,S100B,SOX6,DTX1,TRPC4,MYC,P2RX4,SOX4,GPR157,BNIP3,LYN,TNFRSF21,METRN,ZFP365,GPR37L1,GBA
GO:BP	cellular response to stimulus	GO:0051716	2.11155e-11	10.6754	8351	1395	689	21118	IL13RA2,IL1B,APOB,LILRB4A,MLXIPL,HPSE,GPR35,NLRP3,ITGAD,TSPAN32,IL1RN,CLEC7A,TIFAB,MILR1,BCL2A1B,ITGAM,HCAR2,SCIMP,ITGAX,HK3,TRPM2,PIRB,PILRA,5430427O19RIK,CD300LF,BCL2A1A,BTNL2,SLC2A5,CTSS,P2RY13,LAG3,SAA3,SPP1,DOCK2,FCGR1,MGARP,ADORA3,HAVCR2,HRH2,PRAM1,CLEC2I,RAC2,CD36,PIK3AP1,ARHGAP9,C3,IL1A,VAV1,BTK,C3AR1,RUNX3,CCL4,TREM2,TLR7,CAPN3,CD68,LAT2,OSM,HVCN1,LPAR5,RAB39,LY86,NCF1,FCGR4,BIN2,HCK,SLA…
GO:BP	cellular response to organic substance	GO:0071310	2.39853e-11	10.6201	2453	1395	257	21118	IL13RA2,IL1B,APOB,LILRB4A,MLXIPL,GPR35,NLRP3,IL1RN,SCIMP,TRPM2,PIRB,CD300LF,SLC2A5,CTSS,P2RY13,SAA3,SPP1,MGARP,HAVCR2,HRH2,CD36,IL1A,BTK,CCL4,TREM2,CD68,OSM,LY86,FCGR4,CD86,AIF1,ATP1A3,CCL12,GNA15,CCR1,ADCY7,CX3CR1,TNFSF13B,P2RY6,HTR5B,CCR5,CD180,SPI1,CSF3R,PTPN6,TNF,FCER1G,PTAFR,RXRG,CORO1A,WAS,CXCR2,PTPRN,CSF1R,P2RY12,TFAP2B,CSF2RB,FBN2,ALOX15,NEURL1A,TICAM2,CCL3,IL10RA,CCR6,CHRM3,CCL6,DCSTAMP,…
GO:BP	plasma membrane bounded cell projection morphogenesis	GO:0120039	2.70639e-11	10.5676	670	1395	100	21118	RAC2,RUNX3,NCKAP1L,CCR5,ARHGAP4,CSF1R,RELN,SLITRK4,GAP43,RHOH,FMN1,SYT4,KIF5A,TUBB3,SLITRK5,PAK3,NYAP1,POSTN,RNF157,SYT1,DCX,MYO16,CNTN4,CRMP1,SLITRK2,DCC,ATP8A2,DSCAM,ETV4,BCL11B,SCN1B,CD44,WNT7B,SEMA4A,PTPRO,EGR2,PTPRZ1,TUBB2B,ABI3,CAMK2A,KIF5C,PLXNC1,CAMK2B,LRP1,SEMA3E,NPTX1,ANK3,SEMA4D,DAB1,PLXNB2,CDK5R1,MAPK8IP2,PPP1R9A,TANC2,TRPV2,ACHE,RNF165,CXCR4,ARHGAP33,PLEKHO1,THY1,B4GALT6,WASF1,CYFIP2…
GO:BP	positive regulation of MAPK cascade	GO:0043410	2.96679e-11	10.5277	516	1395	84	21118	IL1B,IL1RN,CLEC7A,SCIMP,HAVCR2,CD36,C3,IL1A,CCL4,TREM2,OSM,NCF1,C5AR1,FGD2,CCL12,CCR1,BANK1,P2RY6,UNC5CL,SPI1,TNF,C5AR2,CARD9,CSF1R,GPNMB,ALOX15,CCL3,CCL6,CCL2,PTPRC,LAPTM5,GPR55,TLR9,SLAMF1,PIK3R5,PAK3,PYCARD,CD74,CCL11,CCL9,ARRB2,ITGB3,DCC,IKBKE,SYK,PTK2B,CD44,SOX2,PIK3CG,WNT7B,CCL5,PDGFRA,LRP1,NOX4,SHC2,P2RX7,MIF,MAPK8IP2,GADD45G,TMEM106A,PRKCD,C1QTNF1,NTRK3,TIMP2,APOE,PAK1,TLR4,TRF,MAP4K1,PSA…
GO:BP	cell activation involved in immune response	GO:0002263	2.9754e-11	10.5265	294	1395	59	21118	CD244,IL13RA2,SLAMF6,LILRB4A,NLRP3,CLEC7A,MILR1,CD84,DNASE1L3,DOCK2,HAVCR2,PRAM1,RAC2,BTK,TREM2,LAT2,LY9,APBB1IP,SLC11A1,CD180,SPI1,FCER1G,PTAFR,CORO1A,ITGAL,TYROBP,CD300A,FGR,CCL3,CCR6,PTPRC,IRF8,SLAMF1,NFKBID,PYCARD,CD74,UNC13D,PLCL2,FGL2,SYK,PTK2B,STXBP2,LGALS1,SEMA4A,CHGA,IL4RA,GRN,LCP1,DOCK11,PLCG2,ADA,TLR4,LOXL3,RAB27A,SLC15A4,KIT,UNG,LYN,ICOSL
GO:BP	regulation of cellular process	GO:0050794	2.98488e-11	10.5251	12140	1395	937	21118	CD244,IL13RA2,IL1B,SLAMF6,APOB,CST7,LILRB4A,MLXIPL,HPSE,GPR35,C130026I21RIK,NLRP3,ITGAD,TSPAN32,IL1RN,CLEC7A,TIFAB,PKIB,MILR1,BCL2A1B,ITGAM,SIGLECF,HCAR2,SCIMP,ITGAX,HK3,TRPM2,PIRB,PILRA,5430427O19RIK,CD84,CD300LF,BCL2A1A,H2-OA,BTNL2,CTSS,DMRTB1,P2RY13,LAG3,SAA3,SPP1,DNASE1L3,DOCK2,CSN2,FCGR1,MGARP,ADORA3,HAVCR2,HRH2,PRAM1,CLEC2I,RAC2,CD36,PIK3AP1,EGLN3,ARHGAP9,C3,IL1A,VAV1,CCDC88B,BTK,C3AR1,RUNX…
GO:BP	regulation of protein kinase activity	GO:0045859	3.19493e-11	10.4955	742	1395	107	21118	IL1B,LILRB4A,IL1RN,PKIB,FCGR1,RAC2,NCF1,CD86,NCKAP1L,C5AR1,FGD2,SLC11A1,PTPN6,TNF,CD300A,LILR4B,CSF1R,RELN,FGR,NEURL1A,HMGA2,PTPRC,LCP2,TLR9,DUSP9,PIK3R5,TTBK1,PAK3,PYCARD,CD74,TLR1,DUSP26,ARRB2,ITGB3,CDKN2A,ANG,ERBB3,AREG,PTPN5,IKBKE,SYK,PTK2B,PIK3CG,WNT7B,ADORA1,CCL5,RGS2,PTPRO,UBASH3B,RGS14,NOX4,SHC2,P2RX7,DAB1,MIF,CDK5R1,MAPK8IP2,CAMKK1,PPP1R9A,GADD45G,TGFBR1,PRKCD,THY1,NTRK3,AGAP2,APOE,EPHB2…
GO:BP	cytoskeleton organization	GO:0007010	3.34123e-11	10.4761	1390	1395	167	21118	GPR35,TSPAN32,TRPM2,DOCK2,CLEC2I,RAC2,IL1A,CCDC88B,CAPN3,HCK,AIF1,NCKAP1L,FGD2,CCL12,TNF,PLEK,CORO1A,WAS,TYROBP,CSF1R,FGR,MYO1G,ALOX15,NEURL1A,RHOH,FMN1,CCL3,SH3BP1,GPR65,CAPN6,CCL2,FMNL1,PARVG,LRGUK,PDLIM4,NAV3,SIRPA,TUBB3,PAK3,HCLS1,ITGB5,TLE6,PYCARD,CCL11,COTL1,MYO7A,DCX,ITGB3,CRMP1,ANG,ATP8A2,MYO5A,LSP1,FSD1,PTK2B,ADD2,ESPN,GMFG,PCDH15,CSPG5,GDA,ESPL1,BFSP2,RGS14,TUBB2B,INA,ARAP1,ABI3,PDGFRA,…
GO:BP	regulation of leukocyte cell-cell adhesion	GO:1903037	3.88156e-11	10.411	304	1395	60	21118	CD244,IL1B,NLRP3,BTNL2,LAG3,HAVCR2,IL1A,CCDC88B,RUNX3,TNFAIP8L2,CD86,AIF1,NCKAP1L,TNFSF13B,PTPN6,TNF,TNFSF14,PTAFR,CORO1A,RASAL3,ITGAL,CD300A,SASH3,GPNMB,RHOH,IL1RL2,ALOX5,CCL2,PTPRC,LAPTM5,CARD11,H2-AA,SLAMF1,SIRPA,DOCK8,NFKBID,PYCARD,SLFN1,CD74,PLA2G2D,CDKN2A,CD83,CEBPB,FGL2,SYK,CD44,PAG1,CD80,CCL5,LGALS1,IL4RA,CD276,THY1,ADA,LOXL3,BLM,DTX1,SOX4,TNFRSF21,ICOSL
GO:BP	neuron projection morphogenesis	GO:0048812	4.77849e-11	10.3207	656	1395	98	21118	RAC2,RUNX3,NCKAP1L,CCR5,ARHGAP4,CSF1R,RELN,SLITRK4,GAP43,RHOH,FMN1,SYT4,KIF5A,TUBB3,SLITRK5,PAK3,NYAP1,POSTN,RNF157,SYT1,DCX,MYO16,CNTN4,CRMP1,SLITRK2,DCC,ATP8A2,DSCAM,ETV4,BCL11B,SCN1B,WNT7B,SEMA4A,PTPRO,EGR2,PTPRZ1,TUBB2B,ABI3,CAMK2A,KIF5C,PLXNC1,CAMK2B,LRP1,SEMA3E,NPTX1,ANK3,SEMA4D,DAB1,PLXNB2,CDK5R1,MAPK8IP2,PPP1R9A,TANC2,TRPV2,ACHE,RNF165,CXCR4,ARHGAP33,THY1,B4GALT6,WASF1,CYFIP2,NTRK3,BCAN,A…
GO:BP	vesicle-mediated transport	GO:0016192	5.69491e-11	10.2445	1582	1395	183	21118	IL13RA2,IL1B,CLEC7A,MILR1,SIGLECF,CD84,CD300LF,DOCK2,FCGR1,PRAM1,RAC2,CD36,C3,VAV1,NCF4,BTK,ARL11,TREM2,LAT2,RAB39,BIN2,HCK,AIF1,NCKAP1L,CCR1,ITGB2,LGALS3,P2RY6,SLC11A1,PLD4,SPI1,TNF,FCER1G,PTAFR,PLEK,SIGLECH,CORO1A,WAS,CXCR2,ITGAL,TYROBP,CD300A,FCRLS,DENND1C,APOBR,FGR,MYO1G,ALOX15,TICAM2,RHOH,CD22,CCL3,IL10RA,SYT4,SH3BP1,SYNGR1,CNIH2,SYT6,CCL2,RAB20,PTPRC,LAPTM5,IRF8,C2,RAB3B,RAB15,KIF5A,SLAMF1,…
GO:BP	regulation of response to stress	GO:0080134	6.57227e-11	10.1823	1254	1395	154	21118	IL1B,SLAMF6,CST7,HPSE,NLRP3,TSPAN32,CLEC7A,SCIMP,HK3,TRPM2,5430427O19RIK,CTSS,LAG3,DNASE1L3,FCGR1,HAVCR2,CD36,PIK3AP1,C3,IL1A,VAV1,BTK,TREM2,OSM,NCF1,TNFAIP8L2,CD200R1,CCR1,CX3CR1,UNC5CL,CCR5,SPI1,TNF,FCER1G,CNR2,CD37,ALOX5AP,WAS,TYROBP,CARD9,FGR,ALOX15,CCL3,MLIP,IL1RL2,EYA4,ALOX5,CCL2,HMGA2,OAS3,KLRB1B,TLR9,IL16,SLAMF1,SIRPA,TTBK1,LACC1,PYCARD,PYHIN1,CD74,PLA2G2D,KLRK1,CEBPA,KCNK2,ACP5,ARRB2,PEN…
GO:BP	regulation of kinase activity	GO:0043549	7.90068e-11	10.1023	845	1395	116	21118	IL1B,LILRB4A,IL1RN,PKIB,FCGR1,RAC2,NCF1,CD86,NCKAP1L,C5AR1,FGD2,SLC11A1,PTPN6,TNF,CD300A,LILR4B,CSF1R,RELN,FGR,NEURL1A,RHOH,HMGA2,PTPRC,LCP2,TLR9,DUSP9,PIK3R5,TTBK1,PAK3,PYCARD,CD74,TLR1,DUSP26,ARRB2,ITGB3,EEF1A2,CDKN2A,ANG,ERBB3,AREG,PTPN5,IKBKE,SYK,PTK2B,PIK3CG,WNT7B,ADORA1,CCL5,RGS2,PTPRO,UBASH3B,RGS14,SOCS3,PDGFRA,AXL,NOX4,SHC2,P2RX7,DAB1,MIF,CDK5R1,MAPK8IP2,CAMKK1,PPP1R9A,GADD45G,TGFBR1,PRKC…
GO:BP	regulation of cell death	GO:0010941	8.10705e-11	10.0911	1740	1395	196	21118	IL1B,IL1RN,CLEC7A,BCL2A1B,HCAR2,HK3,TRPM2,BCL2A1A,SPP1,CD36,RUNX3,CLEC5A,TREM2,CAPN3,OSM,TNFAIP8L2,HCK,AIF1,NCKAP1L,CD200R1,C5AR1,BCL2A1D,C1QA,CCL12,CX3CR1,LGALS3,CCR5,TNF,TNFSF14,FCER1G,CORO1A,CXCR2,TYROBP,CARD9,CSF1R,PDCD1,GPNMB,TFAP2B,NEURL1A,CCL3,RASSF5,EYA4,HMGA2,PTPRC,EN2,LAPTM5,CARD11,NLRP1B,SOX11,DUSP9,LGMN,DOCK8,NCF2,GABRB3,PAK3,HCLS1,NFKBID,INHBB,PYCARD,PIK3CD,CD74,RNF157,KLRK1,KCNK2,AR…
GO:BP	immune effector process	GO:0002252	9.3647e-11	10.0285	683	1395	100	21118	CD244,IL13RA2,IL1B,SLAMF6,LILRB4A,NLRP3,CLEC7A,MILR1,SCIMP,PIRB,CD84,LAG3,DNASE1L3,DOCK2,FCGR1,HAVCR2,PRAM1,RAC2,CD36,C3,VAV1,BTK,C1QC,TREM2,LAT2,NCF1,CD86,TREM1,C1QA,LY9,C1QB,APBB1IP,SLC11A1,CD180,SPI1,PTPN6,TNF,FCER1G,PTAFR,CD37,CORO1A,WAS,ITGAL,TYROBP,CD300A,SASH3,FGR,MYO1G,CD8A,CCL3,CCR6,CCL2,PTPRC,LAPTM5,KLRB1B,IRF8,C2,TLR9,SLAMF1,NFKBID,CFI,PYCARD,C4B,CD74,KLRK1,UNC13D,ARRB2,PLCL2,FGL2,SYK,…
GO:BP	regulation of defense response	GO:0031347	9.95631e-11	10.0019	575	1395	89	21118	IL1B,SLAMF6,CST7,NLRP3,TSPAN32,5430427O19RIK,CTSS,LAG3,DNASE1L3,FCGR1,HAVCR2,PIK3AP1,C3,VAV1,BTK,TREM2,OSM,TNFAIP8L2,CD200R1,CCR1,CX3CR1,CCR5,SPI1,TNF,FCER1G,CNR2,CD37,ALOX5AP,TYROBP,CARD9,FGR,ALOX15,CCL3,IL1RL2,ALOX5,OAS3,KLRB1B,TLR9,IL16,SIRPA,TTBK1,LACC1,PYCARD,PYHIN1,CD74,PLA2G2D,KLRK1,CEBPA,ACP5,ARRB2,PENK,TLR2,CEBPB,NT5E,FGL2,IKBKE,PIK3CG,ADORA1,IFI202B,CCL5,SOCS3,IL17RA,DAGLB,CTSC,ABHD12,C…
GO:BP	cell part morphogenesis	GO:0032990	1.0144e-10	9.99379	704	1395	102	21118	RAC2,RUNX3,NCKAP1L,CCR5,ARHGAP4,CSF1R,RELN,SLITRK4,GAP43,RHOH,FMN1,SYT4,KIF5A,TUBB3,SLITRK5,PAK3,NYAP1,POSTN,RNF157,SYT1,DCX,MYO16,CNTN4,ITGB3,CRMP1,SLITRK2,DCC,ATP8A2,DSCAM,ETV4,BCL11B,SCN1B,CD44,WNT7B,CSPG5,SEMA4A,PTPRO,EGR2,PTPRZ1,TUBB2B,ABI3,CAMK2A,KIF5C,PLXNC1,CAMK2B,LRP1,SEMA3E,NPTX1,ANK3,SEMA4D,DAB1,PLXNB2,CDK5R1,MAPK8IP2,PPP1R9A,TANC2,TRPV2,ACHE,RNF165,CXCR4,ARHGAP33,PLEKHO1,THY1,B4GALT6,…
GO:BP	positive regulation of leukocyte migration	GO:0002687	1.12713e-10	9.94803	148	1395	39	21118	IL1B,RAC2,IL1A,C3AR1,CCL4,TREM2,AIF1,NCKAP1L,C5AR1,CCL12,CCR1,CX3CR1,LGALS3,SPI1,TNFSF14,PTAFR,CXCR2,CSF1R,P2RY12,CCL3,CCR6,CCL2,SLAMF1,LGMN,DOCK8,PYCARD,CD74,ITGB3,PTK2B,CCL5,PGF,CMKLR1,MMP14,CXCL14,THY1,GPSM3,CAMK1D,SERPINE1,P2RX4
GO:BP	neuron development	GO:0048666	1.2719e-10	9.89555	1208	1395	149	21118	RAC2,C3,RUNX3,NCKAP1L,C1QA,CCR5,ARHGAP4,LST1,CSF1R,RELN,SLITRK4,GAP43,NEURL1A,RHOH,FMN1,SYT4,EN2,SEZ6,SALL3,KIF5A,TUBB3,HCN1,SLITRK5,GABRB3,PAK3,RAP1GAP2,NYAP1,POSTN,ONECUT2,RNF157,SYT1,ATCAY,MYO7A,DCX,MYO16,CNTN4,CRMP1,SLITRK2,DCC,ATP8A2,AREG,DSCAM,ARSB,PTPN5,ETV4,BCL11B,GPRIN1,CTSZ,SCN1B,PTK2B,SYN1,WNT7B,LGI4,RGS2,PCDH15,LGALS1,SEMA4A,PTPRO,EGR2,PTPRZ1,TUBB2B,ABI3,CAMK2A,KIF5C,PLXNC1,CAMK2B,LRP…
GO:BP	response to organic substance	GO:0010033	1.3566e-10	9.86755	3418	1395	330	21118	IL13RA2,IL1B,APOB,LILRB4A,MLXIPL,GPR35,NLRP3,IL1RN,CLEC7A,TBXAS1,SCIMP,TRPM2,PIRB,CD300LF,SLC2A5,CTSS,P2RY13,SAA3,SPP1,MGARP,HAVCR2,HRH2,CD36,IL1A,BTK,RUNX3,CCL4,TREM2,CD68,OSM,LY86,FCGR4,CD86,AIF1,ATP1A3,C5AR1,CCL12,GNA15,CCR1,ADCY7,CX3CR1,TNFSF13B,P2RY6,SLC11A1,HTR5B,CCR5,CD180,SPI1,CSF3R,PTPN6,TNF,FCER1G,PTAFR,CNR2,RXRG,CORO1A,CAR9,WAS,CXCR2,CARD9,PTPRN,CSF1R,P2RY12,TFAP2B,CSF2RB,FBN2,ALOX15,N…
GO:BP	neuron projection development	GO:0031175	1.39625e-10	9.85504	1066	1395	136	21118	RAC2,RUNX3,NCKAP1L,CCR5,ARHGAP4,LST1,CSF1R,RELN,SLITRK4,GAP43,NEURL1A,RHOH,FMN1,SYT4,SEZ6,KIF5A,TUBB3,SLITRK5,PAK3,RAP1GAP2,NYAP1,POSTN,RNF157,SYT1,ATCAY,MYO7A,DCX,MYO16,CNTN4,CRMP1,SLITRK2,DCC,ATP8A2,AREG,DSCAM,ARSB,PTPN5,ETV4,BCL11B,GPRIN1,CTSZ,SCN1B,PTK2B,WNT7B,RGS2,PCDH15,LGALS1,SEMA4A,PTPRO,EGR2,PTPRZ1,TUBB2B,ABI3,CAMK2A,KIF5C,PLXNC1,CAMK2B,LRP1,SEMA3E,NPTX1,MMP2,ANK3,SEMA4D,GRN,DAB1,STX1B,P…
GO:BP	MAPK cascade	GO:0000165	1.69646e-10	9.77046	771	1395	108	21118	IL1B,IL1RN,CLEC7A,SCIMP,HAVCR2,CD36,C3,IL1A,CCL4,TREM2,OSM,NCF1,C5AR1,FGD2,CCL12,CCR1,BANK1,P2RY6,SLC11A1,UNC5CL,TLR13,SPI1,PTPN6,TNF,C5AR2,CARD9,CD300A,CSF1R,GPNMB,ALOX15,CCL3,CCL6,CCL2,PTPRC,LAPTM5,GPR55,TLR9,SLAMF1,SIRPA,DUSP9,PIK3R5,PAK3,DOK2,PYCARD,CD74,CCL11,CCL9,DUSP26,ARRB2,ITGB3,DCC,DOK1,PTPN5,IKBKE,SYK,PTK2B,CD44,SOX2,PIK3CG,WNT7B,CCL5,RGS2,RGS14,PDGFRA,LRP1,NOX4,SHC2,P2RX7,MIF,MAPK8IP2…
GO:BP	multicellular organismal process	GO:0032501	1.76496e-10	9.75326	8483	1395	693	21118	CD244,IL1B,SLAMF6,APOB,CST7,LILRB4A,MLXIPL,HPSE,GPR35,NLRP3,TSPAN32,IL1RN,CRYBA4,CLEC7A,TIFAB,TBXAS1,HCAR2,SCIMP,ITGAX,TRPM2,PIRB,CD84,CD300LF,H2-OA,BTNL2,SLC2A5,CTSS,DMRTB1,LAG3,SPP1,DOCK2,CSN2,HAVCR2,HRH2,CLEC2I,RAC2,CD36,C3,IL1A,VAV1,CCDC88B,BTK,C3AR1,ARL11,RUNX3,CLEC5A,C1QC,CCL4,TREM2,TLR7,CAPN3,OSM,TNFRSF13B,TNFRSF9,F9,STAG3,FCGR4,CD86,AIF1,F2RL2,AFP,ATP1A3,NCKAP1L,CD200R1,C5AR1,BCL2A1D,C1QA…
GO:BP	regulation of vesicle-mediated transport	GO:0060627	2.03897e-10	9.69059	582	1395	89	21118	IL13RA2,IL1B,CLEC7A,SIGLECF,CD84,CD300LF,DOCK2,FCGR1,PRAM1,RAC2,CD36,C3,TREM2,HCK,NCKAP1L,LGALS3,SLC11A1,SPI1,TNF,FCER1G,PTAFR,CORO1A,CD300A,FGR,ALOX15,CD22,SYT4,SYT6,CCL2,PTPRC,C2,RAB3B,RAB15,SLAMF1,SIRPA,DGKI,PYCARD,SYT1,UNC13D,DCX,ARRB2,ITGB3,RSPO1,MYO5A,PTPN5,CD63,SYK,APBA2,SYN1,STXBP2,CSPG5,AXL,LRP1,CDH13,APLN,BIN1,IL4RA,TRIM9,SCAMP5,STX1B,CDK5R1,SH3GL3,DNM1,TUB,CHRNA4,APOE,RAP1GAP,PLCG2,BMP…
GO:BP	plasma membrane bounded cell projection organization	GO:0120036	2.30394e-10	9.63753	1536	1395	177	21118	TRPM2,RAC2,RUNX3,TREM2,AIF1,ATP1A3,NCKAP1L,FGD2,CCR5,ARHGAP4,PLEK,CORO1A,WAS,LST1,CSF1R,RELN,SLITRK4,P2RY12,GAP43,NEURL1A,RHOH,FMN1,SYT4,SH3BP1,SEZ6,LRGUK,KIF5A,LGMN,TUBB3,SLITRK5,PAK3,RAP1GAP2,NYAP1,POSTN,ONECUT2,RNF157,SYT1,ATCAY,MYO7A,DCX,MYO16,CNTN4,CRMP1,SLITRK2,DCC,CDKL1,ATP8A2,AREG,DSCAM,ARSB,PTPN5,ETV4,BCL11B,GPRIN1,CTSZ,SCN1B,PTK2B,CD44,ESPN,WNT7B,CCL5,RGS2,PCDH15,LGALS1,SEMA4A,PTPRO,EGR…
GO:BP	regulation of nervous system development	GO:0051960	2.41551e-10	9.61699	516	1395	82	21118	IL1B,CST7,ITGAX,CX3CR1,CCR5,TNF,ARHGAP4,RXRG,RELN,SLITRK4,NEURL1A,SYT4,BHLHE41,HMGA2,SOX11,SLITRK5,PAK3,TLE6,CCL11,DCX,TLR2,SLITRK2,LRRTM3,DSCAM,WNT7B,LGI4,SEMA4A,EGR2,PTPRZ1,ZFP488,SOX10,NKX2-2,RGS14,BRINP1,PLXNC1,CAMK2B,LRP1,SEMA3E,CTSC,SEMA4D,BIN1,CHD7,DAB1,PLXNB2,CDK5R1,TRPV2,ACHE,CXCR4,ETV5,BEX1,CLSTN3,THY1,NTRK3,APOE,EPHB2,OLIG2,MAPT,LINGO1,DBN1,NLGN3,LRRC4B,PAK1,TRF,SRPX2,S100B,PLXNB3,MYC,…
GO:BP	positive regulation of interleukin-6 production	GO:0032755	2.66224e-10	9.57475	105	1395	32	21118	IL1B,CLEC7A,SCIMP,CD36,IL1A,TLR7,AIF1,CCR5,TNF,FCER1G,PTAFR,TYROBP,CARD9,TICAM2,POU2F2,IL1RL2,LAPTM5,TLR9,IL16,PYCARD,CD74,TLR1,RAB7B,TLR2,SYK,IL17RA,P2RX7,TMEM106A,TLR4,CYBA,F2R,TLR6
GO:BP	cell projection organization	GO:0030030	3.10378e-10	9.50811	1576	1395	180	21118	TRPM2,RAC2,RUNX3,TREM2,AIF1,ATP1A3,NCKAP1L,FGD2,CCR5,ARHGAP4,PLEK,CORO1A,WAS,LST1,CSF1R,RELN,SLITRK4,P2RY12,GAP43,NEURL1A,RHOH,FMN1,SYT4,SH3BP1,SEZ6,PARVG,LRGUK,KIF5A,LGMN,TUBB3,SLITRK5,PAK3,RAP1GAP2,NYAP1,POSTN,ONECUT2,RNF157,SYT1,ATCAY,MYO7A,DCX,MYO16,CNTN4,ITGB3,CRMP1,SLITRK2,DCC,CDKL1,ATP8A2,AREG,DSCAM,ARSB,PTPN5,ETV4,BCL11B,GPRIN1,CTSZ,SCN1B,PTK2B,CD44,ESPN,WNT7B,CCL5,RGS2,PCDH15,CSPG5,LGALS…
GO:BP	mononuclear cell migration	GO:0071674	3.17849e-10	9.49778	174	1395	42	21118	TRPM2,C3AR1,CCL4,AIF1,CD200R1,C5AR1,CCL12,CCR1,LGALS3,SPI1,TNFSF14,2610528A11RIK,ITGAL,CSF1R,MYO1G,CCL3,CCR6,CCL6,ALOX5,CCL2,SLAMF1,SIRPA,LGMN,DOCK8,PYCARD,CCL11,CCL9,ITGB3,CXCL16,PTK2B,CCL5,PTPRO,CMKLR1,CXCL14,EPS8,RIPK3,SERPINE1,CKLF,LYN,EXT1,GBA,RPS19
GO:BP	cellular component organization or biogenesis	GO:0071840	3.42203e-10	9.46572	6270	1395	538	21118	IL1B,APOB,GPR35,NLRP3,TSPAN32,CLEC7A,PKIB,PPFIA4,SIGLECF,TRPM2,5430427O19RIK,CTSS,DNASE1L3,DOCK2,FCGR1,MGARP,CLEC2I,RAC2,CD36,C3,IL1A,VAV1,CCDC88B,RUNX3,C1QC,TREM2,CAPN3,OSM,RAB39,STAG3,BIN2,HCK,AIF1,ATP1A3,NCKAP1L,C5AR1,FGD2,C1QA,CCL12,C1QB,CX3CR1,LGALS3,CCR5,LPCAT2,SPI1,CD53,TNF,TNFSF14,FCER1G,ARHGAP4,PLEK,CORO1A,ALOX5AP,WAS,TYROBP,LST1,PTPRN,CD300A,CSF1R,RELN,SLITRK4,P2RY12,CSF2RB,FGR,MYO1G,GA…
GO:BP	cellular response to cytokine stimulus	GO:0071345	3.75531e-10	9.42535	822	1395	112	21118	IL13RA2,IL1B,APOB,GPR35,IL1RN,PIRB,CD300LF,SAA3,SPP1,IL1A,BTK,CCL4,TREM2,OSM,AIF1,CCL12,CCR1,CX3CR1,TNFSF13B,CCR5,SPI1,CSF3R,PTPN6,TNF,FCER1G,CORO1A,WAS,CXCR2,PTPRN,CSF1R,CSF2RB,ALOX15,TICAM2,CCL3,IL10RA,CCR6,CCL6,DCSTAMP,SYNGR1,IL21R,IL1RL2,CCL2,RAB20,PTPRC,LAPTM5,HK2,OAS3,IRF8,CSF2RA,SIRPA,DOCK8,HCLS1,CSF2RB2,PYCARD,POSTN,PYHIN1,CD74,CCL11,ELAVL2,CCL9,RAB7B,CEBPA,EBI3,TLR2,DOK1,CEBPB,LSP1,IKBKE…
GO:BP	ion transmembrane transport	GO:0034220	4.07088e-10	9.39031	1103	1395	138	21118	GPR35,TRPM2,CTSS,TREM2,CAPN3,HVCN1,ATP1A3,P2RY6,CACNA1S,SLC11A1,CCR5,COX6A2,AA467197,PTPN6,TNF,PTAFR,CORO1A,SLC37A2,RELN,SLC16A3,P2RY12,KCNE3,CCL3,FXYD7,CHRM3,CNIH2,CACNG8,ALOX5,CCL2,KCND1,PTPRC,CYBB,TLR9,SCN8A,SLC46A1,HCN1,KCNK10,GABRB3,CNIH3,KCNK13,SCN11A,SHISA8,SLC39A14,STAC2,SLC35G1,KCNK2,WNK3,ITGB3,S100A6,SLC13A3,KCNK6,MYO5A,RGS7,HPN,CACNG5,CD63,SCN1B,PTK2B,KCNIP1,KCNAB2,KCNG2,PIK3CG,SLC9A9,…
GO:BP	cation transport	GO:0006812	4.11983e-10	9.38512	1192	1395	146	21118	GPR35,TRPM2,CD84,CTSS,BTK,CCL4,TREM2,CAPN3,HVCN1,ATP1A3,CCL12,CCR1,LGALS3,P2RY6,CACNA1S,SLC11A1,CCR5,COX6A2,AA467197,PTPN6,FCER1G,CORO1A,CD300A,RELN,P2RY12,KCNE3,CCL3,FXYD7,SYT4,CNIH2,CACNG8,SYT6,ALOX5,CCL2,KCND1,PTPRC,TLR9,SCN8A,RAB3B,IL16,SLC46A1,HCN1,KCNK10,CNIH3,KCNK13,SCN11A,SHISA8,SLC39A14,SYT1,STAC2,SLC35G1,KCNK2,ARRB2,WNK3,ITGB3,SLC13A3,KCNK6,MYO5A,RGS7,HPN,CACNG5,CD63,SCN1B,SYK,PTK2B,KCN…
GO:BP	innate immune response	GO:0045087	4.36973e-10	9.35954	866	1395	116	21118	CD244,SLAMF6,NLRP3,CLEC7A,5430427O19RIK,LAG3,FCGR1,HAVCR2,C3,VAV1,BTK,CLEC5A,C1QC,CCL4,TREM2,TLR7,LY86,TNFAIP8L2,HCK,SLA,AIF1,TREM1,C1QA,LY9,CCL12,C1QB,CCR1,CX3CR1,LGALS3,SLC11A1,PLD4,TLR13,CD180,SPI1,PTPN6,FCER1G,CORO1A,WAS,TYROBP,CARD9,CSF1R,FGR,TICAM2,CCL3,CCL6,IL1RL2,CCL2,RAB20,OAS3,KLRB1B,RNASE6,IRF8,C2,H2-AA,NLRP1B,TLR12,CYBB,TLR9,SLAMF1,SIRPA,LACC1,CFI,PYCARD,PIK3CD,PYHIN1,CLEC4A2,C4B,CD74…
GO:BP	mononuclear cell differentiation	GO:1903131	4.41304e-10	9.35526	446	1395	74	21118	IL1B,SLAMF6,NLRP3,TRPM2,PIRB,H2-OA,LAG3,DOCK2,IL1A,VAV1,BTK,RUNX3,TREM2,NCKAP1L,BCL2A1D,LY9,TNFSF13B,SPI1,PTPN6,FCER1G,IKZF1,SASH3,CD8A,RHOH,CCR6,DCSTAMP,POU2F2,IL1RL2,PTPRC,IRF8,CARD11,H2-AA,TLR9,SLAMF1,BATF3,NFKBID,CD79B,CD74,PLA2G2D,MAFB,GPR18,PLCL2,CDKN2A,CD83,CEBPB,BCL11B,FGL2,SYK,PTK2B,NFAM1,CMTM7,LGALS1,SEMA4A,AXL,IL4RA,CHD7,MMP14,INPP5D,DOCK11,PLCG2,ADA,RIPK3,LOXL3,PSAP,BLM,DTX1,CTSL,MYC,…
GO:BP	cell junction organization	GO:0034330	4.47539e-10	9.34917	741	1395	104	21118	IL1B,PPFIA4,C3,C1QC,TREM2,C5AR1,C1QA,C1QB,CX3CR1,TNF,CSF1R,RELN,SLITRK4,GAP43,NEURL1A,FMN1,LGI2,IL10RA,SH3BP1,SEZ6,ARHGAP22,SHISA7,LGMN,SLITRK5,GABRB3,PAK3,CDH19,IGSF21,ITGB3,SLITRK2,LRRTM3,MYO5A,DSCAM,PTK2B,ADD2,ERC2,SYN1,WNT7B,SEMA4A,PTPRO,CDH24,INA,SDK2,ABI3,CAMK2B,LRP1,SPTBN2,SEMA3E,RAPSN,NPTX1,ANK3,SEMA4D,LHFPL4,LRRC4,MMP14,PLXNB2,CDK5R1,PPP1R9A,TANC2,RAB39B,TGFBR1,ACHE,ETV5,ARHGAP33,CLSTN3,…
GO:BP	regulation of hydrolase activity	GO:0051336	4.76267e-10	9.32215	1183	1395	145	21118	CST7,NLRP3,CLEC7A,DOCK2,CSN2,EGLN3,ARHGAP9,C3,VAV1,CCL4,CD86,NCKAP1L,BCL2A1D,CCL12,RGS1,TNF,TNFSF14,PTAFR,ARHGAP4,PLEK,RASAL3,CARD9,APOC1,CD300A,CCL3,SH3BP1,CCL6,SLC7A14,GPR65,RGS10,CCL2,PTPRC,COL6A3,LAPTM5,GPR55,OAS3,ARHGAP22,NLRP1B,LGMN,DOCK8,TTBK1,DGKI,PYCARD,TAGAP,RAP1GAP2,C4B,RASA4,COL7A1,CCL11,SLC39A14,CCL9,PTPRN2,ARRB2,GMIP,PPP1R3B,CDKN2A,ANG,CTSD,NAIP6,RGS7,HPN,NAIP5,SYK,PTK2B,CD44,ADAP1,…
GO:BP	regulation of protein phosphorylation	GO:0001932	6.9e-10	9.16115	1211	1395	147	21118	IL1B,LILRB4A,MLXIPL,IL1RN,CLEC7A,PKIB,FCGR1,RAC2,CD36,C3,TREM2,TLR7,OSM,NCF1,CD86,AIF1,NCKAP1L,C5AR1,FGD2,BANK1,CX3CR1,SLC11A1,PTPN6,TNF,CD300A,LILR4B,CSF1R,RELN,GPNMB,FGR,TMEM119,NEURL1A,HMGA2,PTPRC,LCP2,TLR9,SIRPA,DUSP9,PIK3R5,TTBK1,PAK3,HCLS1,INHBB,PYCARD,SLFN1,CD74,TLR1,DUSP26,ARRB2,WNK3,ITGB3,RSPO1,PLCL2,CDKN2A,ANG,ERBB3,AREG,PTPN5,IKBKE,SYK,PTK2B,CD44,PIK3CG,WNT7B,ADORA1,CD80,CCL5,RGS2,PTPR…
GO:BP	secretion	GO:0046903	7.11037e-10	9.14811	1034	1395	131	21118	IL13RA2,IL1B,IL1RN,TIFAB,MILR1,HCAR2,TRPM2,CD84,SPP1,CSN2,HRH2,PRAM1,RAC2,IL1A,BTK,TREM2,LAT2,OSM,HCK,CCR1,CSN3,SPI1,TNF,FCER1G,PTAFR,PLEK,CYP4F18,CORO1A,CAR9,PTPRN,CD300A,P2RY12,TFAP2B,FGR,MYO1G,PTGS1,NEURL1A,CCL3,CHRM3,SYT4,SYNGR1,SYT6,ALOX5,HMGA2,HK2,SOX11,RAB3B,RAB15,DGKI,INHBB,VGF,CD74,PLA2G2D,UCN2,SYT1,UNC13D,SLC16A10,PTPRN2,WNK3,TLR2,RAB3IL1,MYT1,ANG,MYO5A,OLFM2,ERBB3,SYK,APBA2,ERC2,PCSK6,…
GO:BP	cellular ion homeostasis	GO:0006873	7.19515e-10	9.14296	685	1395	98	21118	IL1B,GPR35,TBXAS1,TRPM2,5430427O19RIK,SPP1,CD36,IL1A,C3AR1,CAPN3,HVCN1,RAB39,F2RL2,ATP1A3,C5AR1,GNA15,CCR1,CX3CR1,P2RY6,SLC11A1,CCR5,GNG3,PTPN6,C5AR2,CORO1A,CD52,CXCR2,TFAP2B,CCL3,CCR6,HEXB,CCL2,RAB20,PTPRC,GPR55,GM6377,LACC1,GPR18,SLC39A14,SLC35G1,ITGB3,MYO5A,PTK2B,PIK3CG,SLC9A9,ADORA1,CCL5,UBASH3B,CHGA,PDGFRA,GSTO1,LRP1,CCRL2,MARCKSL1,CMKLR1,TTC7,CHD7,GRN,P2RX7,TRPV2,SLC24A1,THY1,C1QTNF1,APOE,P…
GO:BP	regulation of lymphocyte activation	GO:0051249	8.27238e-10	9.08237	547	1395	84	21118	CD244,IL1B,NLRP3,CLEC7A,H2-OA,BTNL2,LAG3,HAVCR2,CLEC2I,RAC2,IL1A,CCDC88B,BTK,RUNX3,TNFRSF13B,TNFAIP8L2,CD86,AIF1,NCKAP1L,BANK1,LGALS3,TNFSF13B,THEMIS2,PTPN6,TNFSF14,CORO1A,RASAL3,ITGAL,TYROBP,LST1,CD300A,SASH3,GPNMB,FGR,RHOH,IL1RL2,CCL2,PTPRC,NFATC2,LAPTM5,CARD11,H2-AA,SOX11,TLR9,SLAMF1,SIRPA,DOCK8,NFKBID,PYCARD,SLFN1,CD74,PLA2G2D,CDKN2A,CD83,CEBPB,FGL2,SYK,NFAM1,PAG1,CD80,CCL5,LGALS1,AXL,IL4RA,C…
GO:BP	positive regulation of phosphorus metabolic process	GO:0010562	8.52025e-10	9.06955	982	1395	126	21118	CD244,IL1B,MLXIPL,IL1RN,CLEC7A,PIRB,FCGR1,CD36,C3,TREM2,OSM,NCF1,CD86,AIF1,NCKAP1L,FGD2,BANK1,CX3CR1,P2RY6,SLC11A1,TNF,PTAFR,PLEK,CD300A,CSF1R,RELN,GPNMB,FGR,TMEM119,NEURL1A,HMGA2,PTPRC,LCP2,TLR9,PIK3R5,TTBK1,PAK3,HCLS1,INHBB,CD74,TLR1,DUSP26,ARRB2,WNK3,ITGB3,EEF1A2,RSPO1,ANG,ERBB3,AREG,DSCAM,PTPN5,IKBKE,SYK,PTK2B,CD44,PIK3CG,WNT7B,ADORA1,CD80,CCL5,PTPRZ1,GUCA1A,CHGA,PDGFRA,AXL,PGF,NOX4,APLN,SEMA…
GO:BP	positive regulation of phosphate metabolic process	GO:0045937	8.52025e-10	9.06955	982	1395	126	21118	CD244,IL1B,MLXIPL,IL1RN,CLEC7A,PIRB,FCGR1,CD36,C3,TREM2,OSM,NCF1,CD86,AIF1,NCKAP1L,FGD2,BANK1,CX3CR1,P2RY6,SLC11A1,TNF,PTAFR,PLEK,CD300A,CSF1R,RELN,GPNMB,FGR,TMEM119,NEURL1A,HMGA2,PTPRC,LCP2,TLR9,PIK3R5,TTBK1,PAK3,HCLS1,INHBB,CD74,TLR1,DUSP26,ARRB2,WNK3,ITGB3,EEF1A2,RSPO1,ANG,ERBB3,AREG,DSCAM,PTPN5,IKBKE,SYK,PTK2B,CD44,PIK3CG,WNT7B,ADORA1,CD80,CCL5,PTPRZ1,GUCA1A,CHGA,PDGFRA,AXL,PGF,NOX4,APLN,SEMA…
GO:BP	adaptive immune response	GO:0002250	8.63237e-10	9.06387	528	1395	82	21118	CD244,IL13RA2,IL1B,SLAMF6,LILRB4A,NLRP3,PIRB,H2-OA,CTSS,LAG3,FCGR1,HAVCR2,C3,BTK,C3AR1,C1QC,H2-OB,LAT2,TNFRSF13B,CD86,ADGRE1,TREM1,C1QA,LY9,C1QB,ADCY7,TNFSF13B,SLC11A1,CD48,PTPN6,TNF,FCER1G,WAS,SASH3,PDCD1,MYO1G,ALOX15,CD8A,CCR6,PTPRC,H2-EB1,C2,H2-AA,H2-DMB2,SLAMF1,NFKBID,CFI,PYCARD,PIK3CD,CLEC4A2,CD79B,C4B,CD74,KLRK1,UNC13D,H2-DMA,SYK,PTK2B,PAG1,SEMA4A,IL17RA,C1RL,CTSC,IL4RA,H2-DMB1,P2RX7,MIF,IN…
GO:BP	positive regulation of gene expression	GO:0010628	9.48728e-10	9.02286	1171	1395	143	21118	CD244,IL1B,SLAMF6,APOB,HPSE,NLRP3,CLEC7A,SCIMP,ITGAX,BTNL2,HAVCR2,CD36,C3,IL1A,CCDC88B,C3AR1,CLEC5A,CCL4,TREM2,TLR7,OSM,CD86,AIF1,C5AR1,LY9,SLC11A1,CCR5,SPI1,BLNK,TNF,FCER1G,PTAFR,CD37,TYROBP,CARD9,SASH3,CSF1R,FGR,TMEM119,TICAM2,CCL3,CELF3,POU2F2,IL1RL2,CCL2,HMGA2,PTPRC,NFATC2,LAPTM5,OAS3,IRF8,CARD11,SOX11,CYBB,TLR9,IL16,SLAMF1,TTBK1,PYCARD,POSTN,PIK3CD,CD74,SPON1,KLRK1,TLR1,RAB7B,CEBPA,ARRB2,TLR…
GO:BP	trans-synaptic signaling	GO:0099537	9.88033e-10	9.00523	709	1395	100	21118	IL1B,PIRB,HRH2,CX3CR1,TNF,CNR2,TYROBP,RELN,NEURL1A,CHRM3,SYT4,SYNGR1,CNIH2,SV2C,SYT6,CCL2,SEZ6,PDLIM4,SHISA7,RAB3B,LGMN,SORCS2,SLITRK5,GABRB3,CNIH3,DGKI,VGF,SHISA8,SYT1,PTPRN2,ARRB2,PENK,PLCL2,DCC,MYO5A,CACNG5,PTPN5,PTK2B,APBA2,ERC2,SYN1,ADORA1,STXBP2,CSPG5,HRH1,EGR2,GRIK3,NETO1,RGS14,TUBB2B,CACNG4,FABP5,CAMK2A,CAMK2B,SPTBN2,DAGLB,RAPSN,NPTX1,GRIK4,LRRC4,TRIM9,P2RX7,STX1B,MAPK8IP2,SORCS3,PPP1R9A,…
GO:BP	synaptic signaling	GO:0099536	9.97696e-10	9.001	740	1395	103	21118	IL1B,PIRB,HRH2,CX3CR1,TNF,CNR2,TYROBP,RELN,NEURL1A,CHRM3,SYT4,SYNGR1,CNIH2,SV2C,SYT6,RGS10,CCL2,SEZ6,PDLIM4,SHISA7,RAB3B,LGMN,SORCS2,SLITRK5,GABRB3,CNIH3,DGKI,VGF,SHISA8,SYT1,PTPRN2,ARRB2,PENK,PLCL2,DCC,MYO5A,CACNG5,PTPN5,PTK2B,APBA2,ERC2,SYN1,ADORA1,STXBP2,CSPG5,HRH1,EGR2,GRIK3,NETO1,RGS14,TUBB2B,CACNG4,FABP5,CAMK2A,CAMK2B,SPTBN2,DAGLB,RAPSN,NPTX1,GRIK4,LRRC4,TRIM9,P2RX7,STX1B,CDK5R1,MAPK8IP2,SO…
GO:BP	apoptotic process	GO:0006915	1.05267e-09	8.97771	1919	1395	207	21118	IL1B,IL1RN,BCL2A1B,HCAR2,BCL2A1A,SPP1,DNASE1L3,EGLN3,IL1A,BTK,RUNX3,CLEC5A,TREM2,CAPN3,OSM,NCF1,TNFRSF9,TNFAIP8L2,HCK,AIF1,NCKAP1L,C5AR1,BCL2A1D,CCL12,CX3CR1,LGALS3,CCR5,SPI1,TNF,TNFSF14,FCER1G,CORO1A,CXCR2,TYROBP,CARD9,CSF1R,PDCD1,TFAP2B,NEURL1A,TNS4,CCL3,RASSF5,EYA4,HMGA2,PTPRC,EN2,HK2,CARD11,NLRP1B,DUSP9,LGMN,DOCK8,NCF2,GABRB3,PAK3,HCLS1,TNFRSF11B,NFKBID,INHBB,PYCARD,PIK3CD,CD74,RNF157,KLRK1,A…
GO:BP	cellular component morphogenesis	GO:0032989	1.1746e-09	8.93011	794	1395	108	21118	RAC2,RUNX3,CAPN3,NCKAP1L,CCR5,ARHGAP4,CSF1R,RELN,SLITRK4,GAP43,RHOH,FMN1,SYT4,KIF5A,TUBB3,SLITRK5,PAK3,NYAP1,POSTN,RNF157,SYT1,DCX,MYO16,CNTN4,TLR2,ITGB3,CRMP1,SLITRK2,DCC,ATP8A2,DSCAM,ETV4,BCL11B,SCN1B,CD44,WNT7B,CSPG5,SEMA4A,PTPRO,EGR2,PTPRZ1,TUBB2B,ABI3,CAMK2A,KIF5C,PDGFRA,PLXNC1,CAMK2B,LRP1,SEMA3E,NPTX1,ANK3,SEMA4D,DAB1,PLXNB2,CDK5R1,MAPK8IP2,PPP1R9A,TANC2,TRPV2,ACHE,RNF165,CXCR4,ARHGAP33,PLE…
GO:BP	positive regulation of cell differentiation	GO:0045597	1.22197e-09	8.91294	922	1395	120	21118	IL1B,APOB,NLRP3,CLEC7A,CD36,RUNX3,TREM2,NCKAP1L,CCR1,CX3CR1,CCR5,TNF,TNFSF14,TYROBP,SASH3,CSF1R,RELN,TMEM119,FBN2,NEURL1A,RHOH,CCL3,DCSTAMP,IL1RL2,PTPRC,H2-AA,SOX11,CD101,PAK3,HCLS1,NFKBID,TLE6,CD74,RAB7B,UNC13D,DCX,CEBPA,ARRB2,TLR2,ITGB3,BRINP3,CD83,CEBPB,OLFM2,DSCAM,ETV4,SYK,SOX2,WNT7B,CCL5,CSPG5,EGR2,PTPRZ1,ZFP488,SOX10,NKX2-2,RGS14,ZFP385A,SOCS3,BRINP1,AXL,PLXNC1,CAMK2B,LRP1,CDS1,SEMA4D,BIN1,…
GO:BP	cell development	GO:0048468	1.32066e-09	8.87921	2340	1395	241	21118	IL1B,CLEC7A,DMRTB1,DNASE1L3,HRH2,RAC2,C3,IL1A,BTK,RUNX3,CLEC5A,TREM2,CAPN3,NCKAP1L,C5AR1,C1QA,CX3CR1,CCR5,SPI1,PTPN6,TNF,ARHGAP4,TYROBP,LST1,CSF1R,RELN,SLITRK4,GAP43,NEURL1A,RHOH,FMN1,FERMT3,CCR6,SYT4,BHLHE41,POU2F2,LPXN,HEXB,HMGA2,PTPRC,NFATC2,EN2,SEZ6,PARVG,SOX11,SALL3,KIF5A,TUBB3,HCN1,SLITRK5,GABRB3,PAK3,INHBB,TLE6,RAP1GAP2,NYAP1,POSTN,CCL11,ONECUT2,RNF157,SYT1,ATCAY,MYO7A,UNC13D,DCX,MYO16,CEB…
GO:BP	cellular cation homeostasis	GO:0030003	1.39015e-09	8.85694	672	1395	96	21118	IL1B,GPR35,TRPM2,5430427O19RIK,SPP1,CD36,IL1A,C3AR1,CAPN3,HVCN1,RAB39,F2RL2,ATP1A3,C5AR1,GNA15,CCR1,CX3CR1,P2RY6,SLC11A1,CCR5,GNG3,PTPN6,C5AR2,CORO1A,CD52,CXCR2,TFAP2B,CCL3,CCR6,HEXB,CCL2,RAB20,PTPRC,GPR55,GM6377,LACC1,GPR18,SLC39A14,SLC35G1,ITGB3,MYO5A,PTK2B,PIK3CG,SLC9A9,ADORA1,CCL5,UBASH3B,CHGA,PDGFRA,GSTO1,LRP1,CCRL2,MARCKSL1,CMKLR1,TTC7,CHD7,GRN,P2RX7,TRPV2,SLC24A1,THY1,C1QTNF1,APOE,PLCG2,SL…
GO:BP	regulation of transmembrane transport	GO:0034762	1.448e-09	8.83923	592	1395	88	21118	IL1B,GPR35,CTSS,C3,TREM2,CAPN3,HVCN1,P2RY6,CACNA1S,PTPN6,TNF,PTAFR,CORO1A,RELN,KCNE3,FXYD7,CHRM3,CNIH2,CACNG8,ALOX5,CCL2,KCND1,HK2,AK1,CYBB,TLR9,SCN8A,HCN1,CNIH3,KCNK13,SCN11A,SHISA8,STAC2,WNK3,ITGB3,MYO5A,RGS7,CACNG5,ERBB3,CD63,SCN1B,PTK2B,RNASEL,KCNIP1,KCNAB2,KCNG2,PIK3CG,RGS2,UBASH3B,NETO1,CACNG4,FABP5,GSTO1,ANK3,BIN1,CHD7,P2RX7,MIF,MAPK8IP2,KCNQ2,PRKCD,THY1,DPP6,CHRNA4,EPHB2,PLCG2,SLC8A1,NLGN…
GO:BP	positive regulation of cell adhesion	GO:0045785	2.29625e-09	8.63898	423	1395	70	21118	CD244,IL1B,NLRP3,BTNL2,SPP1,HAVCR2,CD36,IL1A,VAV1,CCDC88B,RUNX3,CD86,AIF1,NCKAP1L,APBB1IP,TNFSF13B,CCR5,PTPN6,TNF,TNFSF14,PTAFR,CORO1A,RASAL3,ITGAL,SASH3,P2RY12,ALOX15,RHOH,FMN1,IL1RL2,ALOX5,CCL2,PTPRC,CARD11,H2-AA,SLAMF1,SIRPA,DOCK8,NFKBID,PYCARD,CD74,UNC13D,DUSP26,ITGB3,CD83,CD63,SYK,PTK2B,CD44,SOX2,CD80,CCL5,CSPG5,LGALS1,ADAM19,CDH13,ANK3,IL4RA,CD276,THY1,RAP1GAP,DBN1,ADA,EMILIN1,BLM,RAC3,SOX4…
GO:BP	T cell proliferation	GO:0042098	2.31862e-09	8.63477	207	1395	45	21118	CD244,IL1B,LILRB4A,ITGAD,BTNL2,DOCK2,HAVCR2,CLEC2I,RAC2,IL1A,CCDC88B,CD86,AIF1,NCKAP1L,LGALS3,TNFSF13B,SLC11A1,PTPN6,CORO1A,RASAL3,ITGAL,SASH3,GPNMB,PTPRC,LAPTM5,CARD11,H2-AA,SLAMF1,DOCK8,PYCARD,SLFN1,PLA2G2D,EBI3,ELF4,CDKN2A,CEBPB,SYK,CD80,CCL5,CD276,P2RX7,RIPK3,BLM,TNFRSF21,ICOSL
GO:BP	positive regulation of defense response	GO:0031349	2.54994e-09	8.59347	256	1395	51	21118	IL1B,SLAMF6,5430427O19RIK,CTSS,LAG3,FCGR1,HAVCR2,C3,VAV1,BTK,TREM2,OSM,CCR5,SPI1,TNF,FCER1G,ALOX5AP,TYROBP,CARD9,CCL3,TLR9,IL16,TTBK1,PYCARD,PYHIN1,CD74,KLRK1,CEBPA,PENK,TLR2,CEBPB,IKBKE,PIK3CG,IFI202B,CCL5,IL17RA,CTSC,GRN,MIF,IFI204,AIM2,GPSM3,SERPINE1,TLR4,MNDA,SLC15A4,CYBA,NUPR1,TLR6,ABCC1,RPS19
GO:BP	negative regulation of cell adhesion	GO:0007162	2.67372e-09	8.57288	290	1395	55	21118	IL1RN,LAG3,HAVCR2,RUNX3,TNFAIP8L2,CD86,SPI1,PTPN6,CD300A,GPNMB,LPXN,PTPRC,LAPTM5,PDE3B,H2-AA,NFKBID,SLFN1,POSTN,CD74,PLA2G2D,CDKN2A,CEBPB,ERBB3,DSCAM,FGL2,ANGPT2,PAG1,CD80,LGALS1,PTPRZ1,UBASH3B,PLXNC1,LRP1,CDH13,SEMA3E,MMP2,SEMA4D,IL4RA,CD276,MMP14,DAB1,PLXNB2,PRKCD,LAMB1,C1QTNF1,EPHB2,SERPINE1,CD9,LOXL3,PLXNB3,DTX1,TNR,TNFRSF21,PLXNA3,AKNA
GO:BP	transmembrane transport	GO:0055085	2.83831e-09	8.54694	1533	1395	173	21118	IL1B,ABCC3,GPR35,TRPM2,SLC2A5,CTSS,CD36,C3,SPNS3,TREM2,CAPN3,HVCN1,STRA6L,ATP1A3,P2RY6,CACNA1S,SLC11A1,CCR5,COX6A2,AA467197,PTPN6,TNF,PTAFR,CORO1A,SLC37A2,RELN,SLC16A3,P2RY12,KCNE3,SLCO4A1,CCL3,FXYD7,CHRM3,CNIH2,SLC7A14,SV2C,CACNG8,ALOX5,CCL2,KCND1,PTPRC,HK2,AK1,ABCD2,CYBB,TLR9,SCN8A,SLC46A1,HCN1,KCNK10,GABRB3,CNIH3,KCNK13,SCN11A,SLC7A7,SHISA8,SLC39A14,SLC16A10,SLC2A6,STAC2,SLC35G1,KCNK2,SLC15A3,…
GO:BP	negative regulation of response to stimulus	GO:0048585	2.93571e-09	8.53229	1616	1395	180	21118	IL13RA2,IL1B,CST7,LILRB4A,NLRP3,IL1RN,HK3,CD84,CD300LF,BTNL2,HAVCR2,PIK3AP1,TNFAIP8L2,AIF1,CD200R1,CCL12,CCR1,BANK1,CX3CR1,LGALS3,SPI1,PTPN6,RGS1,TNF,C5AR2,PLEK,CNR2,RASAL3,CD300A,PDCD1,FBN2,ALOX15,NEURL1A,TICAM2,RHOH,CD22,SH3BP1,LPXN,MLIP,RGS10,EYA4,ALOX5,HMGA2,PTPRC,LAPTM5,OAS3,KLRB1B,TLR9,SALL3,SLAMF1,SIRPA,DUSP9,LGMN,NFKBID,DOK2,TLE6,PYCARD,RASA4,CD74,GPR18,ONECUT2,RAB7B,DUSP26,ACP5,ARRB2,PLC…
GO:BP	anterograde trans-synaptic signaling	GO:0098916	2.93716e-09	8.53207	701	1395	98	21118	IL1B,PIRB,HRH2,CX3CR1,TNF,CNR2,TYROBP,RELN,NEURL1A,CHRM3,SYT4,SYNGR1,CNIH2,SV2C,SYT6,CCL2,SEZ6,PDLIM4,SHISA7,RAB3B,LGMN,SORCS2,SLITRK5,GABRB3,CNIH3,DGKI,VGF,SHISA8,SYT1,PTPRN2,ARRB2,PENK,PLCL2,DCC,MYO5A,CACNG5,PTPN5,PTK2B,APBA2,ERC2,SYN1,ADORA1,STXBP2,CSPG5,HRH1,EGR2,GRIK3,NETO1,RGS14,TUBB2B,CACNG4,CAMK2A,CAMK2B,SPTBN2,RAPSN,NPTX1,GRIK4,LRRC4,TRIM9,P2RX7,STX1B,MAPK8IP2,SORCS3,PPP1R9A,DNM1,SLC24A1…
GO:BP	chemical synaptic transmission	GO:0007268	2.93716e-09	8.53207	701	1395	98	21118	IL1B,PIRB,HRH2,CX3CR1,TNF,CNR2,TYROBP,RELN,NEURL1A,CHRM3,SYT4,SYNGR1,CNIH2,SV2C,SYT6,CCL2,SEZ6,PDLIM4,SHISA7,RAB3B,LGMN,SORCS2,SLITRK5,GABRB3,CNIH3,DGKI,VGF,SHISA8,SYT1,PTPRN2,ARRB2,PENK,PLCL2,DCC,MYO5A,CACNG5,PTPN5,PTK2B,APBA2,ERC2,SYN1,ADORA1,STXBP2,CSPG5,HRH1,EGR2,GRIK3,NETO1,RGS14,TUBB2B,CACNG4,CAMK2A,CAMK2B,SPTBN2,RAPSN,NPTX1,GRIK4,LRRC4,TRIM9,P2RX7,STX1B,MAPK8IP2,SORCS3,PPP1R9A,DNM1,SLC24A1…
GO:BP	positive regulation of cell-cell adhesion	GO:0022409	2.98164e-09	8.52554	257	1395	51	21118	CD244,IL1B,NLRP3,BTNL2,HAVCR2,IL1A,CCDC88B,RUNX3,CD86,AIF1,NCKAP1L,TNFSF13B,CCR5,TNF,TNFSF14,PTAFR,CORO1A,RASAL3,ITGAL,SASH3,ALOX15,RHOH,IL1RL2,ALOX5,CCL2,PTPRC,CARD11,H2-AA,SLAMF1,SIRPA,DOCK8,NFKBID,PYCARD,CD74,CD83,SYK,CD44,SOX2,CD80,CCL5,LGALS1,ADAM19,ANK3,IL4RA,CD276,THY1,RAP1GAP,ADA,BLM,SOX4,ICOSL
GO:BP	positive regulation of phosphorylation	GO:0042327	3.30934e-09	8.48026	903	1395	117	21118	IL1B,MLXIPL,IL1RN,CLEC7A,FCGR1,CD36,C3,TREM2,OSM,NCF1,CD86,AIF1,NCKAP1L,FGD2,BANK1,CX3CR1,SLC11A1,TNF,CD300A,CSF1R,RELN,GPNMB,FGR,TMEM119,NEURL1A,HMGA2,PTPRC,LCP2,TLR9,PIK3R5,TTBK1,PAK3,HCLS1,INHBB,CD74,TLR1,ARRB2,WNK3,ITGB3,EEF1A2,RSPO1,ANG,ERBB3,AREG,DSCAM,PTPN5,IKBKE,SYK,PTK2B,CD44,PIK3CG,WNT7B,ADORA1,CD80,CCL5,PTPRZ1,CHGA,PDGFRA,AXL,PGF,NOX4,APLN,SEMA4D,SHC2,P2RX7,DAB1,MIF,CDK5R1,MAPK8IP2,CAM…
GO:BP	regulation of chemotaxis	GO:0050920	3.34919e-09	8.47506	225	1395	47	21118	IL1B,RAC2,C3AR1,CCL4,TREM2,AIF1,NCKAP1L,C5AR1,CCL12,CCR1,SPI1,TNFSF14,C5AR2,CXCR2,CSF1R,P2RY12,CCL3,CCR6,CCL2,IL16,SLAMF1,LGMN,CD74,GPR18,DSCAM,ANGPT2,PTK2B,CCL5,SEMA4A,TUBB2B,PDGFRA,PGF,CDH13,SEMA3E,SEMA4D,CMKLR1,MIF,CXCL14,CXCR4,NTRK3,GPSM3,CAMK1D,SERPINE1,P2RX4,SEMA4G,LYN,PLXNA3
GO:BP	divalent inorganic cation homeostasis	GO:0072507	3.8805e-09	8.41111	533	1395	81	21118	IL1B,GPR35,TRPM2,SPP1,CD36,C3AR1,CAPN3,F2RL2,C5AR1,GNA15,CCR1,CX3CR1,P2RY6,SLC11A1,CCR5,GNG3,PTPN6,C5AR2,CORO1A,CD52,CXCR2,TFAP2B,CCL3,CCR6,HEXB,CCL2,PTPRC,GPR55,GPR18,SLC39A14,SLC35G1,ITGB3,MYO5A,PTK2B,PIK3CG,ADORA1,CCL5,UBASH3B,CHGA,PDGFRA,GSTO1,LRP1,CCRL2,MARCKSL1,ANK3,CMKLR1,CHD7,P2RX7,TRPV2,SLC24A1,THY1,C1QTNF1,APOE,SNX10,PLCG2,SLC8A1,RASA3,ADM,DLG4,S100B,ATP13A2,ASPH,ACKR2,CIB2,TRPC4,CLN3,P…
GO:BP	cell-cell signaling	GO:0007267	4.00883e-09	8.39698	1504	1395	170	21118	IL1B,IL1RN,HCAR2,TRPM2,PIRB,SPP1,HRH2,C3,IL1A,BTK,CD68,OSM,CCR1,CX3CR1,CCR5,TNF,FCER1G,CNR2,CELA1,TYROBP,PTPRN,CD300A,RELN,P2RY12,GPNMB,TFAP2B,PTGS1,NEURL1A,CCL3,CHRM3,SYT4,SYNGR1,CNIH2,SV2C,SYT6,RGS10,ALOX5,CCL2,HMGA2,SEZ6,SALL1,SOX11,PDLIM4,SHISA7,RAB3B,LGMN,SORCS2,SLITRK5,GABRB3,CNIH3,DGKI,INHBB,VGF,TLE6,SHISA8,UCN2,SYT1,SLC16A10,PTPRN2,ARRB2,PENK,TLR2,RSPO1,MYT1,PLCL2,DCC,MYO5A,CACNG5,PTPN5,S…
GO:BP	regulation of trans-synaptic signaling	GO:0099177	4.25653e-09	8.37094	495	1395	77	21118	IL1B,PIRB,HRH2,CX3CR1,TNF,CNR2,TYROBP,RELN,NEURL1A,SYT4,SYNGR1,CNIH2,CCL2,SHISA7,LGMN,SORCS2,DGKI,VGF,SHISA8,SYT1,ARRB2,PLCL2,DCC,CACNG5,PTPN5,PTK2B,APBA2,ERC2,SYN1,ADORA1,CSPG5,HRH1,EGR2,GRIK3,NETO1,RGS14,TUBB2B,CACNG4,FABP5,CAMK2A,CAMK2B,RAPSN,NPTX1,GRIK4,LRRC4,STX1B,MAPK8IP2,SORCS3,PPP1R9A,DNM1,SLC24A1,CLSTN3,CHRNA4,APOE,EPHB2,MAPT,DLGAP1,DBN1,NLGN3,UNC13A,CELF4,DLG4,S100B,KCNQ4,RIMS2,CLN3,S1P…
GO:BP	inorganic ion homeostasis	GO:0098771	4.30572e-09	8.36595	768	1395	104	21118	IL1B,GPR35,TBXAS1,TRPM2,5430427O19RIK,SPP1,CD36,IL1A,C3AR1,CAPN3,HVCN1,RAB39,F2RL2,ATP1A3,C5AR1,GNA15,CCR1,CX3CR1,P2RY6,SLC11A1,CCR5,GNG3,PTPN6,C5AR2,CORO1A,CD52,CXCR2,TFAP2B,CCL3,CCR6,HEXB,CCL2,RAB20,PTPRC,GPR55,GM6377,LACC1,GPR18,SLC39A14,SLC35G1,ITGB3,MYO5A,PTK2B,PIK3CG,SLC9A9,ADORA1,CCL5,UBASH3B,CHGA,PDGFRA,GSTO1,LRP1,CCRL2,MARCKSL1,ANK3,CMKLR1,TTC7,CHD7,GRN,P2RX7,TRPV2,SLC24A1,THY1,C1QTNF1,A…
GO:BP	positive regulation of transport	GO:0051050	4.40385e-09	8.35617	1005	1395	126	21118	IL1B,CLEC7A,HCAR2,TRPM2,CD300LF,CTSS,SPP1,DOCK2,FCGR1,CD36,C3,IL1A,CCL4,TREM2,CAPN3,NCKAP1L,CCL12,CCR1,LGALS3,P2RY6,SLC11A1,TNF,FCER1G,PTAFR,CYP4F18,RELN,P2RY12,KCNE3,FGR,CCL3,SYT4,ALOX5,CCL2,PTPRC,AK1,C2,SOX11,RAB3B,RAB15,SIRPA,HCN1,HCLS1,INHBB,PYCARD,SYT1,UNC13D,DCX,STAC2,ARRB2,WNK3,TLR2,ANG,ATP8A2,CEBPB,RGS7,ERBB3,PTPN5,CD63,SCN1B,SYK,RNASEL,NNAT,ADORA1,STXBP2,CCL5,SYNGR3,CACNG4,CAMK2A,AXL,GST…
GO:BP	regulation of anatomical structure size	GO:0090066	4.42343e-09	8.35424	554	1395	83	21118	TBXAS1,HRH2,CLEC2I,VAV1,NCKAP1L,CCR5,TNF,PTAFR,ARHGAP4,PLEK,CORO1A,WAS,PTGS1,ALOX15,FMN1,CHRM3,SH3BP1,ALOX5,RAB3B,PAK3,HCLS1,PYCARD,RAP1GAP2,CCL11,COTL1,DCX,WNK3,DSCAM,PTK2B,ADD2,GMFG,WNT7B,ADORA1,RGS2,HRH1,SEMA4A,CHGA,LRP1,SPTBN2,SEMA3E,MMP2,APLN,SEMA4D,BIN1,P2RX7,CDK5R1,PPP1R9A,TRPV2,P2RY2,PRKCD,EPS8,WASF1,CYFIP2,NTRK3,APOE,MAPT,VAV2,DBN1,PAK1,PDXP,ADM,CTNNA2,ATP13A2,FMN2,CLN3,TRIM46,SCPEP1,SEM…
GO:BP	positive regulation of metabolic process	GO:0009893	4.53825e-09	8.34311	3760	1395	349	21118	CD244,IL1B,SLAMF6,APOB,MLXIPL,HPSE,NLRP3,IL1RN,CLEC7A,PKIB,SCIMP,ITGAX,PIRB,BTNL2,SPP1,FCGR1,HAVCR2,CD36,EGLN3,C3,IL1A,CCDC88B,C3AR1,RUNX3,CLEC5A,CCL4,TREM2,TLR7,CAPN3,OSM,HVCN1,NCF1,CD86,AIF1,NCKAP1L,C5AR1,FGD2,LY9,ITGB2,BANK1,CX3CR1,P2RY6,SLC11A1,CCR5,SPI1,BLNK,TNF,FCER1G,PTAFR,PLEK,CD37,RXRG,CELA1,WAS,TYROBP,CARD9,PTPRN,CD300A,SASH3,CSF1R,RNF180,RELN,GPNMB,TFAP2B,TNNI2,FGR,TMEM119,NEURL1A,TICA…
GO:BP	regulation of transferase activity	GO:0051338	4.64217e-09	8.33328	951	1395	121	21118	IL1B,LILRB4A,IL1RN,PKIB,FCGR1,RAC2,NCF1,CD86,NCKAP1L,C5AR1,FGD2,SLC11A1,PTPN6,TNF,CD300A,LILR4B,CSF1R,RELN,FGR,NEURL1A,RHOH,HMGA2,PTPRC,LCP2,TLR9,DUSP9,PIK3R5,TTBK1,PAK3,PYCARD,CD74,TLR1,DUSP26,ARRB2,ITGB3,EEF1A2,CDKN2A,ANG,ERBB3,AREG,PTPN5,IKBKE,SYK,PTK2B,PIK3CG,WNT7B,ADORA1,CCL5,RGS2,PTPRO,UBASH3B,RGS14,SOCS3,PDGFRA,AXL,NOX4,SHC2,P2RX7,DAB1,MIF,CDK5R1,MAPK8IP2,CAMKK1,PPP1R9A,GADD45G,TGFBR1,PRKC…
GO:BP	myeloid cell activation involved in immune response	GO:0002275	4.87255e-09	8.31224	96	1395	29	21118	IL13RA2,LILRB4A,MILR1,CD84,DNASE1L3,DOCK2,HAVCR2,PRAM1,RAC2,BTK,TREM2,LAT2,SPI1,FCER1G,PTAFR,TYROBP,CD300A,FGR,CCL3,SLAMF1,PYCARD,UNC13D,SYK,STXBP2,CHGA,IL4RA,GRN,KIT,LYN
GO:BP	regulation of inflammatory response	GO:0050727	4.89873e-09	8.30992	347	1395	61	21118	IL1B,CST7,NLRP3,CTSS,DNASE1L3,FCGR1,PIK3AP1,C3,BTK,TREM2,OSM,TNFAIP8L2,CD200R1,CX3CR1,CCR5,TNF,FCER1G,CNR2,ALOX5AP,ALOX15,CCL3,IL1RL2,ALOX5,TLR9,IL16,SIRPA,TTBK1,LACC1,PYCARD,PLA2G2D,CEBPA,ACP5,TLR2,CEBPB,NT5E,PIK3CG,ADORA1,CCL5,SOCS3,IL17RA,DAGLB,CTSC,ABHD12,CD276,GRN,MIF,CASP1,APOE,GPSM3,ADA,SERPINE1,TLR4,METRNL,FANCA,LYN,NUPR1,AKNA,TLR6,ABCC1,NLRX1,RPS19
GO:BP	signal transduction	GO:0007165	6.18378e-09	8.20875	6780	1395	567	21118	IL13RA2,IL1B,LILRB4A,MLXIPL,HPSE,GPR35,NLRP3,ITGAD,TSPAN32,IL1RN,CLEC7A,TIFAB,MILR1,BCL2A1B,ITGAM,HCAR2,SCIMP,ITGAX,TRPM2,PIRB,PILRA,5430427O19RIK,CD300LF,BCL2A1A,BTNL2,P2RY13,LAG3,SAA3,SPP1,DOCK2,FCGR1,ADORA3,HAVCR2,HRH2,PRAM1,CLEC2I,RAC2,CD36,PIK3AP1,ARHGAP9,C3,IL1A,VAV1,BTK,C3AR1,RUNX3,CCL4,TREM2,TLR7,CAPN3,LAT2,OSM,LPAR5,RAB39,LY86,NCF1,FCGR4,HCK,SLA,CD86,GPR84,AIF1,F2RL2,AFP,ATP1A3,FYB,NCKAP…
GO:BP	axon development	GO:0061564	6.2303e-09	8.20549	489	1395	76	21118	RAC2,RUNX3,CCR5,ARHGAP4,CSF1R,RELN,SLITRK4,GAP43,RHOH,KIF5A,TUBB3,SLITRK5,PAK3,DCX,CNTN4,CRMP1,SLITRK2,DCC,ATP8A2,DSCAM,ETV4,BCL11B,SCN1B,WNT7B,SEMA4A,PTPRO,EGR2,PTPRZ1,TUBB2B,KIF5C,PLXNC1,LRP1,SEMA3E,NPTX1,MMP2,ANK3,SEMA4D,GRN,DAB1,PLXNB2,MIF,CDK5R1,TRPV2,ACHE,RNF165,BEX1,THY1,B4GALT6,NTRK3,APOE,EPHB2,MAPT,DBN1,NLGN3,PAK1,CTNNA2,UCHL1,TSKU,PLXNB3,UST,TRIM46,SEMA4G,DPYSL5,TNR,OLFM1,ZEB2,NCAM2,TNF…
GO:BP	response to cytokine	GO:0034097	7.03719e-09	8.1526	935	1395	119	21118	IL13RA2,IL1B,APOB,GPR35,IL1RN,PIRB,CD300LF,SAA3,SPP1,IL1A,BTK,CCL4,TREM2,OSM,AIF1,CCL12,CCR1,CX3CR1,TNFSF13B,SLC11A1,CCR5,SPI1,CSF3R,PTPN6,TNF,FCER1G,CORO1A,WAS,CXCR2,PTPRN,CSF1R,CSF2RB,ALOX15,TICAM2,CCL3,IL10RA,CCR6,CCL6,DCSTAMP,SYNGR1,IL21R,IL1RL2,CCL2,RAB20,PTPRC,LAPTM5,HK2,OAS3,IRF8,H2-AA,CSF2RA,SIRPA,DOCK8,HCLS1,CSF2RB2,PYCARD,POSTN,PYHIN1,CD74,CCL11,ELAVL2,CCL9,RAB7B,CEBPA,ACP5,EBI3,TLR2,CX…
GO:BP	regulation of programmed cell death	GO:0043067	7.92006e-09	8.10127	1587	1395	176	21118	IL1B,IL1RN,CLEC7A,BCL2A1B,HCAR2,HK3,BCL2A1A,SPP1,RUNX3,CLEC5A,TREM2,CAPN3,OSM,TNFAIP8L2,HCK,AIF1,NCKAP1L,C5AR1,BCL2A1D,CCL12,CX3CR1,LGALS3,CCR5,TNF,TNFSF14,FCER1G,CORO1A,CXCR2,TYROBP,CARD9,CSF1R,PDCD1,TFAP2B,NEURL1A,CCL3,RASSF5,EYA4,HMGA2,PTPRC,EN2,LAPTM5,CARD11,NLRP1B,DUSP9,LGMN,DOCK8,NCF2,GABRB3,PAK3,HCLS1,NFKBID,INHBB,PYCARD,PIK3CD,CD74,RNF157,KLRK1,ARRB2,WNK3,EEF1A2,CDKN2A,CEBPB,CTSD,NAIP6,HP…
GO:BP	cation homeostasis	GO:0055080	8.22489e-09	8.08487	755	1395	102	21118	IL1B,GPR35,TRPM2,5430427O19RIK,SPP1,CD36,IL1A,C3AR1,CAPN3,HVCN1,RAB39,F2RL2,ATP1A3,C5AR1,GNA15,CCR1,CX3CR1,P2RY6,SLC11A1,CCR5,GNG3,PTPN6,C5AR2,CORO1A,CD52,CXCR2,TFAP2B,CCL3,CCR6,HEXB,CCL2,RAB20,PTPRC,GPR55,GM6377,LACC1,GPR18,SLC39A14,SLC35G1,ITGB3,MYO5A,PTK2B,PIK3CG,SLC9A9,ADORA1,CCL5,UBASH3B,CHGA,PDGFRA,GSTO1,LRP1,CCRL2,MARCKSL1,ANK3,CMKLR1,TTC7,CHD7,GRN,P2RX7,TRPV2,SLC24A1,THY1,C1QTNF1,APOE,SNX…
GO:BP	lymphocyte differentiation	GO:0030098	8.40064e-09	8.07569	397	1395	66	21118	IL1B,SLAMF6,NLRP3,H2-OA,LAG3,DOCK2,IL1A,VAV1,BTK,RUNX3,NCKAP1L,BCL2A1D,LY9,TNFSF13B,SPI1,PTPN6,FCER1G,IKZF1,SASH3,CD8A,RHOH,CCR6,POU2F2,IL1RL2,PTPRC,IRF8,CARD11,H2-AA,TLR9,SLAMF1,NFKBID,CD79B,CD74,PLA2G2D,MAFB,GPR18,PLCL2,CDKN2A,CD83,BCL11B,FGL2,SYK,PTK2B,NFAM1,CMTM7,LGALS1,SEMA4A,AXL,IL4RA,CHD7,MMP14,INPP5D,DOCK11,PLCG2,ADA,RIPK3,LOXL3,PSAP,BLM,DTX1,CTSL,SOX4,KIT,TNFSF8,FANCA,GBA
GO:BP	regulation of nervous system process	GO:0031644	8.50612e-09	8.07027	183	1395	41	21118	CST7,GPR35,ITGAX,CTSS,IL1A,FCGR4,TNF,PTAFR,RELN,CCL3,CNIH2,SHISA7,SCN11A,CACNG5,PTK2B,ADORA1,EGR2,NETO1,ZFP488,SOX10,CACNG4,FABP5,NPTX1,CTSC,STX1B,CHRNA4,DLGAP1,DBN1,NLGN3,CELF4,TLR4,TRF,DLG4,S100B,RIMS2,S1PR2,DLGAP3,TNR,TNFRSF21,F2R,GBA
GO:BP	cellular divalent inorganic cation homeostasis	GO:0072503	8.96746e-09	8.04733	512	1395	78	21118	IL1B,GPR35,TRPM2,SPP1,CD36,C3AR1,CAPN3,F2RL2,C5AR1,GNA15,CCR1,CX3CR1,P2RY6,SLC11A1,CCR5,GNG3,PTPN6,C5AR2,CORO1A,CD52,CXCR2,CCL3,CCR6,HEXB,CCL2,PTPRC,GPR55,GPR18,SLC39A14,SLC35G1,ITGB3,MYO5A,PTK2B,PIK3CG,ADORA1,CCL5,UBASH3B,CHGA,PDGFRA,GSTO1,LRP1,CCRL2,MARCKSL1,CMKLR1,CHD7,P2RX7,TRPV2,SLC24A1,THY1,C1QTNF1,APOE,PLCG2,SLC8A1,RASA3,ADM,DLG4,S100B,ATP13A2,ASPH,ACKR2,CIB2,TRPC4,CLN3,P2RX4,CYBA,GPR157,B…
GO:BP	macrophage migration	GO:1905517	9.08232e-09	8.0418	57	1395	22	21118	GPR35,C3AR1,TREM2,CD200R1,C5AR1,CCL12,CX3CR1,LGALS3,CSF1R,P2RY12,CCL3,CCL2,SLAMF1,PTK2B,CCL5,CMKLR1,MMP14,MIF,EMILIN1,CD9,P2RX4,CKLF
GO:BP	positive regulation of hydrolase activity	GO:0051345	9.58066e-09	8.0186	653	1395	92	21118	NLRP3,CLEC7A,DOCK2,EGLN3,ARHGAP9,VAV1,CCL4,CD86,NCKAP1L,CCL12,RGS1,TNF,PTAFR,ARHGAP4,PLEK,RASAL3,CARD9,CD300A,CCL3,SH3BP1,CCL6,GPR65,RGS10,CCL2,PTPRC,LAPTM5,GPR55,ARHGAP22,NLRP1B,LGMN,DOCK8,TTBK1,PYCARD,TAGAP,RAP1GAP2,RASA4,CCL11,CCL9,GMIP,CDKN2A,ANG,CTSD,RGS7,SYK,PTK2B,ADAP1,CCL5,RGS2,RGS17,COL4A3,RGS14,ARHGDIG,ARAP1,PDGFRA,CAMK2B,GM2A,SEMA4D,BIN1,GRN,PIDD1,ARHGAP15,DOCK11,PRKCD,ARHGDIB,ARHGAP33…
GO:BP	protein phosphorylation	GO:0006468	1.01262e-08	7.99455	1651	1395	181	21118	IL1B,DYRK4,LILRB4A,MLXIPL,IL1RN,CLEC7A,PKIB,SAA3,FCGR1,RAC2,CD36,C3,BTK,RUNX3,TREM2,TLR7,OSM,NCF1,HCK,SLA,CD86,AIF1,NCKAP1L,C5AR1,FGD2,BANK1,CX3CR1,SLC11A1,PTPN6,TNF,MAP3K19,CD300A,LILR4B,CSF1R,RELN,GPNMB,FGR,TMEM119,NEURL1A,CCL3,HCST,HMGA2,PTPRC,LCP2,MATK,TLR9,SIRPA,DUSP9,PIK3R5,TTBK1,PAK3,HCLS1,INHBB,FLT3,STK32A,PYCARD,SLFN1,CD74,TLR1,PRKG2,DUSP26,ARRB2,WNK3,TLR2,ITGB3,RSPO1,PLCL2,CDKN2A,ANG,CD…
GO:BP	behavior	GO:0007610	1.04001e-08	7.98296	716	1395	98	21118	IL1B,IL1RN,TIFAB,PIRB,HRH2,CD36,OSM,ATP1A3,CX3CR1,RNF180,RELN,PTGS1,SYT4,HEXB,SEZ6,SHISA7,LGMN,TTBK1,SLITRK5,KCNK10,GABRB3,DGKI,CCL11,KCNK2,ARRB2,PENK,ATP8A2,MYO5A,CEBPB,OLFM2,DSCAM,PTPN5,APBA2,ESPN,ALDH1A3,ADORA1,LGI4,PCDH15,HRH1,EGR2,PTPRZ1,NETO1,RGS14,ZFP385A,UNC79,BRINP1,MAN2B1,SPTBN2,ADCY3,GM2A,APLN,ABHD12,MEIS2,CHD7,GRN,DAB1,MIF,MAPK8IP2,SORCS3,ETV5,EPS8,LAMB1,CHRNA4,USP2,CASP1,APOE,EPHB2,M…
GO:BP	modulation of chemical synaptic transmission	GO:0050804	1.04331e-08	7.98159	494	1395	76	21118	IL1B,PIRB,HRH2,CX3CR1,TNF,CNR2,TYROBP,RELN,NEURL1A,SYT4,SYNGR1,CNIH2,CCL2,SHISA7,LGMN,SORCS2,DGKI,VGF,SHISA8,SYT1,ARRB2,PLCL2,DCC,CACNG5,PTPN5,PTK2B,APBA2,ERC2,SYN1,ADORA1,CSPG5,HRH1,EGR2,GRIK3,NETO1,RGS14,TUBB2B,CACNG4,CAMK2A,CAMK2B,RAPSN,NPTX1,GRIK4,LRRC4,STX1B,MAPK8IP2,SORCS3,PPP1R9A,DNM1,SLC24A1,CLSTN3,CHRNA4,APOE,EPHB2,MAPT,DLGAP1,DBN1,NLGN3,UNC13A,CELF4,DLG4,S100B,KCNQ4,RIMS2,CLN3,S1PR2,KIT…
GO:BP	cation transmembrane transport	GO:0098655	1.19573e-08	7.92237	888	1395	114	21118	GPR35,TRPM2,CTSS,TREM2,CAPN3,HVCN1,ATP1A3,P2RY6,CACNA1S,SLC11A1,CCR5,COX6A2,AA467197,PTPN6,CORO1A,RELN,P2RY12,KCNE3,CCL3,FXYD7,CNIH2,CACNG8,ALOX5,CCL2,KCND1,PTPRC,TLR9,SCN8A,SLC46A1,HCN1,KCNK10,CNIH3,KCNK13,SCN11A,SHISA8,SLC39A14,STAC2,SLC35G1,KCNK2,WNK3,ITGB3,KCNK6,MYO5A,RGS7,HPN,CACNG5,CD63,SCN1B,PTK2B,KCNIP1,KCNAB2,KCNG2,PIK3CG,SLC9A9,RGS2,SLC41A2,NALCN,HRH1,UBASH3B,NETO1,CACNG4,GSTO1,ORAI2,AN…
GO:BP	positive regulation of leukocyte cell-cell adhesion	GO:1903039	1.31097e-08	7.88241	217	1395	45	21118	CD244,IL1B,NLRP3,BTNL2,HAVCR2,IL1A,CCDC88B,RUNX3,CD86,AIF1,NCKAP1L,TNFSF13B,TNF,TNFSF14,PTAFR,CORO1A,RASAL3,ITGAL,SASH3,RHOH,IL1RL2,ALOX5,CCL2,PTPRC,CARD11,H2-AA,SLAMF1,SIRPA,DOCK8,NFKBID,PYCARD,CD74,CD83,SYK,CD44,CD80,CCL5,LGALS1,IL4RA,CD276,THY1,ADA,BLM,SOX4,ICOSL
GO:BP	positive regulation of immune response	GO:0050778	1.35996e-08	7.86647	606	1395	87	21118	IL1B,SLAMF6,NLRP3,5430427O19RIK,BTNL2,LAG3,FCGR1,HAVCR2,PRAM1,CLEC2I,C3,VAV1,BTK,C3AR1,C1QC,LAT2,FYB,NCKAP1L,C5AR1,BCL2A1D,C1QA,C1QB,TNFSF13B,SLC11A1,THEMIS2,SPI1,BLNK,PTPN6,TNF,C5AR2,FCER1G,PTAFR,TYROBP,CARD9,CD300A,SASH3,ERMAP,FGR,MYO1G,CD22,LPXN,PTPRC,NFATC2,LAPTM5,LCP2,C2,CARD11,TLR9,SLAMF1,NFKBID,CFI,PYCARD,PYHIN1,CD79B,C4B,CD74,KLRK1,PLCL2,IKBKE,SYK,NFAM1,IFI202B,STXBP2,C1RL,CMKLR1,IL4RA,CD…
GO:BP	cellular homeostasis	GO:0019725	1.43468e-08	7.84325	956	1395	120	21118	IL1B,MLXIPL,GPR35,TBXAS1,HK3,TRPM2,5430427O19RIK,HAAO,SPP1,CD36,IL1A,C3AR1,CAPN3,HVCN1,RAB39,F2RL2,ATP1A3,C5AR1,GNA15,CCR1,CX3CR1,P2RY6,SLC11A1,CCR5,GNG3,PTPN6,C5AR2,CORO1A,CD52,CXCR2,TFAP2B,CCL3,CCR6,HEXB,CCL2,RAB20,PTPRC,HK2,GPR55,GM6377,LACC1,GPR18,SLC39A14,SLC35G1,PTPRN2,WNK3,ITGB3,MYT1,DGAT2,MYO5A,PTK2B,DNA2,PIK3CG,SLC9A9,ADORA1,CCL5,LGALS1,UBASH3B,CHGA,PDGFRA,GSTO1,LRP1,CCRL2,NOX4,MARCKSL1,…
GO:BP	calcium ion homeostasis	GO:0055074	1.73107e-08	7.76169	499	1395	76	21118	IL1B,GPR35,TRPM2,SPP1,CD36,C3AR1,CAPN3,F2RL2,C5AR1,GNA15,CCR1,CX3CR1,P2RY6,CCR5,GNG3,PTPN6,C5AR2,CORO1A,CD52,CXCR2,TFAP2B,CCL3,CCR6,HEXB,CCL2,PTPRC,GPR55,GPR18,SLC35G1,ITGB3,MYO5A,PTK2B,PIK3CG,ADORA1,CCL5,UBASH3B,CHGA,PDGFRA,GSTO1,LRP1,CCRL2,MARCKSL1,CMKLR1,CHD7,P2RX7,TRPV2,SLC24A1,THY1,C1QTNF1,APOE,SNX10,PLCG2,SLC8A1,RASA3,ADM,DLG4,S100B,ATP13A2,ASPH,ACKR2,CIB2,TRPC4,CLN3,P2RX4,CYBA,GPR157,BNIP3…
GO:BP	ion homeostasis	GO:0050801	1.7877e-08	7.74771	818	1395	107	21118	IL1B,GPR35,TBXAS1,TRPM2,5430427O19RIK,SPP1,CD36,IL1A,C3AR1,CAPN3,HVCN1,RAB39,F2RL2,ATP1A3,C5AR1,GNA15,CCR1,CX3CR1,P2RY6,SLC11A1,CCR5,GNG3,PTPN6,C5AR2,CORO1A,CD52,CXCR2,TFAP2B,CCL3,CCR6,HEXB,CCL2,RAB20,PTPRC,GPR55,HCN1,GM6377,LACC1,GPR18,SLC39A14,SLC35G1,WNK3,ITGB3,MYO5A,SCN1B,PTK2B,PIK3CG,SLC9A9,ADORA1,CCL5,UBASH3B,CHGA,PDGFRA,GSTO1,LRP1,CCRL2,MARCKSL1,ANK3,CMKLR1,TTC7,CHD7,GRN,P2RX7,TRPV2,SLC24A…
GO:BP	positive regulation of kinase activity	GO:0033674	2.22731e-08	7.65222	551	1395	81	21118	IL1B,IL1RN,FCGR1,NCF1,CD86,NCKAP1L,FGD2,SLC11A1,TNF,CD300A,CSF1R,RELN,FGR,NEURL1A,HMGA2,PTPRC,LCP2,TLR9,PIK3R5,TTBK1,PAK3,CD74,TLR1,ARRB2,ITGB3,EEF1A2,ANG,ERBB3,AREG,IKBKE,SYK,PTK2B,PIK3CG,WNT7B,ADORA1,CCL5,PDGFRA,AXL,NOX4,SHC2,P2RX7,DAB1,MIF,CDK5R1,MAPK8IP2,CAMKK1,PPP1R9A,GADD45G,TGFBR1,PRKCD,NTRK3,AGAP2,EPHB2,VAV2,RIPK3,PAK1,TLR4,TRF,MAP4K1,DLG4,MDFI,TNIK,CCNB1,PSRC1,MAP3K14,KIT,TAOK3,CKS1B,CEN…
GO:BP	export from cell	GO:0140352	2.30629e-08	7.63709	908	1395	115	21118	IL13RA2,IL1B,IL1RN,MILR1,HCAR2,TRPM2,CD84,SPP1,PRAM1,RAC2,IL1A,BTK,TREM2,LAT2,OSM,HCK,ATP1A3,CCR1,SPI1,TNF,FCER1G,PTAFR,PLEK,CORO1A,PTPRN,CD300A,P2RY12,TFAP2B,KCNE3,FGR,MYO1G,PTGS1,CCL3,SYT4,SYNGR1,SYT6,ALOX5,HMGA2,SOX11,RAB3B,RAB15,DGKI,INHBB,VGF,UCN2,SYT1,UNC13D,SLC16A10,SLC35G1,PTPRN2,TLR2,RAB3IL1,MYT1,ANG,MYO5A,OLFM2,SYK,APBA2,ERC2,PCSK6,SYN1,NNAT,ADORA1,STXBP2,CCL5,SYNGR3,CSPG5,CHGA,CAMK2A,A…
GO:BP	regulation of ion transmembrane transport	GO:0034765	2.52799e-08	7.59723	493	1395	75	21118	GPR35,CTSS,TREM2,CAPN3,HVCN1,P2RY6,CACNA1S,PTPN6,TNF,PTAFR,CORO1A,RELN,KCNE3,FXYD7,CHRM3,CNIH2,CACNG8,ALOX5,CCL2,KCND1,CYBB,TLR9,SCN8A,HCN1,CNIH3,KCNK13,SCN11A,SHISA8,STAC2,WNK3,ITGB3,MYO5A,RGS7,CACNG5,CD63,SCN1B,PTK2B,KCNIP1,KCNAB2,KCNG2,PIK3CG,RGS2,UBASH3B,NETO1,CACNG4,GSTO1,ANK3,BIN1,CHD7,P2RX7,MAPK8IP2,KCNQ2,THY1,DPP6,CHRNA4,EPHB2,PLCG2,SLC8A1,NLGN3,DLG4,ASPH,KCNQ4,KCNIP3,CYBA,KCNJ2,KCNA6,GLR…
GO:BP	axonogenesis	GO:0007409	2.63903e-08	7.57856	445	1395	70	21118	RAC2,RUNX3,CCR5,ARHGAP4,CSF1R,RELN,SLITRK4,GAP43,RHOH,KIF5A,TUBB3,SLITRK5,PAK3,DCX,CNTN4,CRMP1,SLITRK2,DCC,ATP8A2,DSCAM,ETV4,BCL11B,SCN1B,WNT7B,SEMA4A,PTPRO,EGR2,PTPRZ1,TUBB2B,KIF5C,PLXNC1,LRP1,SEMA3E,NPTX1,ANK3,SEMA4D,DAB1,PLXNB2,CDK5R1,TRPV2,ACHE,RNF165,THY1,B4GALT6,NTRK3,APOE,EPHB2,MAPT,DBN1,NLGN3,PAK1,CTNNA2,UCHL1,TSKU,PLXNB3,UST,TRIM46,SEMA4G,DPYSL5,TNR,OLFM1,ZEB2,PLXNA3,METRN,RHOG,MAP1S,ETV…
GO:BP	regulation of cellular component biogenesis	GO:0044087	2.85108e-08	7.54499	977	1395	121	21118	IL1B,CLEC7A,TRPM2,CLEC2I,RAC2,CD36,HCK,NCKAP1L,LGALS3,TNF,PLEK,CORO1A,WAS,SLITRK4,P2RY12,GAP43,ALOX15,NEURL1A,FMN1,GPR65,PDLIM4,NAV3,TTBK1,SLITRK5,PAK3,HCLS1,PYCARD,CCL11,COTL1,APOBEC1,SLITRK2,LRRTM3,CDKL1,IKBKE,SYK,PTK2B,ADD2,ESPN,GMFG,GDA,SEMA4A,CHGA,ARAP1,ABI3,LRP1,SPTBN2,NOX4,NPTX1,SEMA4D,LHFPL4,BIN1,TRIM9,MMP14,P2RX7,STX1B,LCP1,PPP1R9A,TGFBR1,FBLIM1,DOCK11,PRKCD,CLSTN3,THY1,EPS8,WASF1,CYFIP2…
GO:BP	positive regulation of protein kinase activity	GO:0045860	3.01987e-08	7.52001	485	1395	74	21118	IL1B,IL1RN,FCGR1,NCF1,CD86,NCKAP1L,FGD2,SLC11A1,TNF,CD300A,CSF1R,RELN,NEURL1A,HMGA2,PTPRC,LCP2,TLR9,PIK3R5,TTBK1,PAK3,CD74,TLR1,ARRB2,ITGB3,ANG,ERBB3,AREG,IKBKE,SYK,PTK2B,PIK3CG,WNT7B,ADORA1,CCL5,NOX4,SHC2,P2RX7,DAB1,MIF,CDK5R1,MAPK8IP2,CAMKK1,PPP1R9A,GADD45G,TGFBR1,PRKCD,NTRK3,AGAP2,RIPK3,PAK1,TLR4,TRF,MAP4K1,DLG4,MDFI,TNIK,CCNB1,PSRC1,MAP3K14,KIT,TAOK3,CKS1B,CENPE,CLSPN,TRAF4,ZEB2,IQGAP3,PTPN1,…
GO:BP	cellular calcium ion homeostasis	GO:0006874	3.01987e-08	7.52001	485	1395	74	21118	IL1B,GPR35,TRPM2,SPP1,CD36,C3AR1,CAPN3,F2RL2,C5AR1,GNA15,CCR1,CX3CR1,P2RY6,CCR5,GNG3,PTPN6,C5AR2,CORO1A,CD52,CXCR2,CCL3,CCR6,HEXB,CCL2,PTPRC,GPR55,GPR18,SLC35G1,ITGB3,MYO5A,PTK2B,PIK3CG,ADORA1,CCL5,UBASH3B,CHGA,PDGFRA,GSTO1,LRP1,CCRL2,MARCKSL1,CMKLR1,CHD7,P2RX7,TRPV2,SLC24A1,THY1,C1QTNF1,APOE,PLCG2,SLC8A1,RASA3,ADM,DLG4,S100B,ATP13A2,ASPH,ACKR2,CIB2,TRPC4,CLN3,P2RX4,CYBA,GPR157,BNIP3,LYN,ANK2,EPO…
GO:BP	regulation of synaptic plasticity	GO:0048167	3.0559e-08	7.51486	214	1395	44	21118	PIRB,HRH2,CX3CR1,TYROBP,RELN,NEURL1A,SYT4,SYNGR1,SHISA7,LGMN,SORCS2,DGKI,VGF,SHISA8,PTPN5,PTK2B,ERC2,SYN1,ADORA1,HRH1,EGR2,NETO1,RGS14,CAMK2A,CAMK2B,SORCS3,PPP1R9A,SLC24A1,APOE,EPHB2,MAPT,DBN1,NLGN3,UNC13A,DLG4,S100B,RIMS2,CLN3,KIT,TNR,SYT12,LRRTM2,SYNPO,BRSK1
GO:BP	cell morphogenesis involved in differentiation	GO:0000904	3.30015e-08	7.48147	762	1395	101	21118	HRH2,RAC2,RUNX3,CCR5,SPI1,PTPN6,ARHGAP4,CSF1R,RELN,SLITRK4,GAP43,RHOH,FMN1,FERMT3,LPXN,PARVG,KIF5A,TUBB3,SLITRK5,PAK3,POSTN,MYO7A,UNC13D,DCX,CNTN4,ITGB3,CRMP1,SLITRK2,DCC,ATP8A2,DSCAM,ETV4,BCL11B,SCN1B,WNT7B,PCDH15,CSPG5,SEMA4A,PTPRO,EGR2,PTPRZ1,TUBB2B,ZFP385A,ABI3,CAMK2A,KIF5C,AXL,PLXNC1,CAMK2B,LRP1,SEMA3E,NPTX1,ANK3,SEMA4D,DAB1,PLXNB2,CDK5R1,MAPK8IP2,PPP1R9A,TANC2,TRPV2,ACHE,RNF165,ARHGAP33,THY…
GO:BP	antigen processing and presentation of peptide or polysaccharide antigen via MHC class II	GO:0002504	3.45797e-08	7.46118	23	1395	14	21118	H2-OA,CTSS,TREM2,H2-OB,FCER1G,CTSE,IFI30,H2-EB1,H2-AA,H2-DMB2,PYCARD,CD74,H2-DMA,H2-DMB1
GO:BP	secretion by cell	GO:0032940	3.65371e-08	7.43727	860	1395	110	21118	IL13RA2,IL1B,IL1RN,MILR1,HCAR2,TRPM2,CD84,SPP1,PRAM1,RAC2,IL1A,BTK,TREM2,LAT2,OSM,HCK,CCR1,SPI1,TNF,FCER1G,PTAFR,PLEK,CORO1A,PTPRN,CD300A,P2RY12,TFAP2B,FGR,MYO1G,PTGS1,CCL3,SYT4,SYNGR1,SYT6,ALOX5,HMGA2,SOX11,RAB3B,RAB15,DGKI,INHBB,VGF,UCN2,SYT1,UNC13D,SLC16A10,PTPRN2,TLR2,RAB3IL1,MYT1,ANG,MYO5A,OLFM2,SYK,APBA2,ERC2,PCSK6,SYN1,NNAT,ADORA1,STXBP2,CCL5,SYNGR3,CSPG5,CHGA,CAMK2A,AXL,LRP1,SPTBN2,APLN,I…
GO:BP	antigen processing and presentation	GO:0019882	3.70155e-08	7.43162	110	1395	30	21118	H2-OA,CTSS,FCGR1,TREM2,H2-OB,CD68,WDFY4,SLC11A1,FCER1G,WAS,CTSE,IFI30,H2-EB1,H2-AA,RAB3B,H2-DMB2,PYCARD,CLEC4A2,RAB32,CD74,H2-DMA,FGL2,H2-DMB1,PSAP,GM8909,CTSL,RAB27A,H2-T10,EXT1,GBA
GO:BP	positive regulation of transferase activity	GO:0051347	3.85041e-08	7.41449	628	1395	88	21118	IL1B,IL1RN,PKIB,FCGR1,NCF1,CD86,NCKAP1L,FGD2,SLC11A1,TNF,CD300A,CSF1R,RELN,FGR,NEURL1A,HMGA2,PTPRC,LCP2,TLR9,PIK3R5,TTBK1,PAK3,CD74,TLR1,ARRB2,ITGB3,EEF1A2,ANG,ERBB3,AREG,IKBKE,SYK,PTK2B,PIK3CG,WNT7B,ADORA1,CCL5,PDGFRA,AXL,NOX4,SHC2,P2RX7,DAB1,MIF,CDK5R1,MAPK8IP2,CAMKK1,PPP1R9A,GADD45G,TGFBR1,PRKCD,NTRK3,AGAP2,EPHB2,VAV2,RIPK3,PAK1,TLR4,TRF,MAP4K1,DLG4,TRIB3,MDFI,TNIK,MYC,CCNB1,PSRC1,MAP3K14,PLK1…
GO:BP	positive regulation of protein phosphorylation	GO:0001934	4.37524e-08	7.359	830	1395	107	21118	IL1B,IL1RN,CLEC7A,FCGR1,CD36,C3,TREM2,OSM,NCF1,CD86,AIF1,NCKAP1L,FGD2,BANK1,CX3CR1,SLC11A1,TNF,CD300A,CSF1R,RELN,GPNMB,TMEM119,NEURL1A,HMGA2,PTPRC,LCP2,TLR9,PIK3R5,TTBK1,PAK3,HCLS1,INHBB,CD74,TLR1,ARRB2,WNK3,ITGB3,RSPO1,ANG,ERBB3,AREG,PTPN5,IKBKE,SYK,PTK2B,CD44,PIK3CG,WNT7B,ADORA1,CD80,CCL5,PTPRZ1,CHGA,PDGFRA,PGF,NOX4,SEMA4D,SHC2,P2RX7,DAB1,MIF,CDK5R1,MAPK8IP2,CAMKK1,PPP1R9A,GADD45G,TGFBR1,ACVR1B…
GO:BP	mast cell activation	GO:0045576	5.27794e-08	7.27754	73	1395	24	21118	IL13RA2,LILRB4A,MILR1,CD84,CD300LF,RAC2,BTK,LAT2,CD48,FCER1G,CNR2,CD300A,FGR,RHOH,LCP2,UNC13D,SYK,STXBP2,CHGA,IL4RA,PTPRE,TLR4,KIT,LYN
GO:BP	actin cytoskeleton organization	GO:0030036	5.47062e-08	7.26196	705	1395	95	21118	TRPM2,DOCK2,CLEC2I,RAC2,IL1A,CAPN3,HCK,AIF1,NCKAP1L,TNF,PLEK,CORO1A,WAS,TYROBP,CSF1R,FGR,MYO1G,ALOX15,RHOH,FMN1,SH3BP1,GPR65,FMNL1,PARVG,PDLIM4,SIRPA,PAK3,HCLS1,ITGB5,TLE6,PYCARD,CCL11,COTL1,MYO7A,ITGB3,ANG,MYO5A,PTK2B,ADD2,ESPN,GMFG,PCDH15,INA,ARAP1,ABI3,PDGFRA,CAMK2B,SPTBN2,NOX4,SEMA3E,MARCKSL1,BIN1,MARCKS,CDK5R1,LCP1,PPP1R9A,TGFBR1,PRKCD,ARHGDIB,EPS8,WASF1,CYFIP2,NTRK3,SH3KBP1,AGAP2,EFS,DBN1,P…
GO:BP	cellular chemical homeostasis	GO:0055082	7.47048e-08	7.12665	870	1395	110	21118	IL1B,MLXIPL,GPR35,TBXAS1,HK3,TRPM2,5430427O19RIK,SPP1,CD36,IL1A,C3AR1,CAPN3,HVCN1,RAB39,F2RL2,ATP1A3,C5AR1,GNA15,CCR1,CX3CR1,P2RY6,SLC11A1,CCR5,GNG3,PTPN6,C5AR2,CORO1A,CD52,CXCR2,TFAP2B,CCL3,CCR6,HEXB,CCL2,RAB20,PTPRC,HK2,GPR55,GM6377,LACC1,GPR18,SLC39A14,SLC35G1,PTPRN2,ITGB3,MYT1,DGAT2,MYO5A,PTK2B,PIK3CG,SLC9A9,ADORA1,CCL5,LGALS1,UBASH3B,CHGA,PDGFRA,GSTO1,LRP1,CCRL2,NOX4,MARCKSL1,CMKLR1,TTC7,CHD…
GO:BP	tumor necrosis factor production	GO:0032640	8.20116e-08	7.08612	172	1395	38	21118	CLEC7A,HAVCR2,CD36,IL1A,CCL4,TREM2,CX3CR1,CCR5,PTPN6,C5AR2,FCER1G,PTAFR,TYROBP,CARD9,SASH3,GPNMB,CCL3,CCL2,PTPRC,OAS3,CYBB,TLR9,SLAMF1,SIRPA,PYCARD,CLEC4A2,GPR18,TLR1,ACP5,ARRB2,SYK,AXL,MIF,TMEM106A,EPHB2,TLR4,CYBA,TLR6
GO:BP	regulation of tumor necrosis factor production	GO:0032680	8.20116e-08	7.08612	172	1395	38	21118	CLEC7A,HAVCR2,CD36,IL1A,CCL4,TREM2,CX3CR1,CCR5,PTPN6,C5AR2,FCER1G,PTAFR,TYROBP,CARD9,SASH3,GPNMB,CCL3,CCL2,PTPRC,OAS3,CYBB,TLR9,SLAMF1,SIRPA,PYCARD,CLEC4A2,GPR18,TLR1,ACP5,ARRB2,SYK,AXL,MIF,TMEM106A,EPHB2,TLR4,CYBA,TLR6
GO:BP	regulation of GTPase activity	GO:0043087	8.59492e-08	7.06576	437	1395	68	21118	DOCK2,ARHGAP9,VAV1,CCL4,NCKAP1L,CCL12,RGS1,ARHGAP4,RASAL3,CCL3,SH3BP1,CCL6,GPR65,RGS10,CCL2,ARHGAP22,DOCK8,DGKI,PYCARD,TAGAP,RAP1GAP2,RASA4,CCL11,CCL9,PTPRN2,ARRB2,GMIP,RGS7,PTK2B,ADAP1,CCL5,RGS2,RGS17,RGS14,ARHGDIG,ARAP1,PLXNC1,SEMA4D,BIN1,PLXNB2,ARHGAP15,DOCK11,ARHGDIB,ARHGAP33,THY1,STMN3,NTRK3,AGAP2,RAP1GAP,ARHGEF26,VAV2,RASAL1,ARHGAP39,MYO9B,RASA3,ARHGAP11A,PLXNB3,ARHGAP24,RINL,IQGAP3,TBC1D8,…
GO:BP	regulation of cytosolic calcium ion concentration	GO:0051480	9.24674e-08	7.03401	390	1395	63	21118	IL1B,GPR35,TRPM2,CD36,C3AR1,CAPN3,F2RL2,C5AR1,GNA15,CCR1,CX3CR1,P2RY6,CCR5,GNG3,PTPN6,C5AR2,CORO1A,CD52,CXCR2,CCL3,CCR6,PTPRC,GPR55,GPR18,SLC35G1,ITGB3,MYO5A,PTK2B,PIK3CG,ADORA1,UBASH3B,CHGA,PDGFRA,GSTO1,LRP1,CCRL2,MARCKSL1,CMKLR1,CHD7,P2RX7,TRPV2,THY1,C1QTNF1,PLCG2,SLC8A1,RASA3,ADM,DLG4,ASPH,ACKR2,CIB2,TRPC4,CLN3,P2RX4,CYBA,GPR157,LYN,ANK2,EPOR,F2R,TPCN2,SYNPO,SMPD3
GO:BP	cellular metal ion homeostasis	GO:0006875	9.77729e-08	7.00978	608	1395	85	21118	IL1B,GPR35,TRPM2,SPP1,CD36,IL1A,C3AR1,CAPN3,F2RL2,ATP1A3,C5AR1,GNA15,CCR1,CX3CR1,P2RY6,SLC11A1,CCR5,GNG3,PTPN6,C5AR2,CORO1A,CD52,CXCR2,CCL3,CCR6,HEXB,CCL2,PTPRC,GPR55,GPR18,SLC39A14,SLC35G1,ITGB3,MYO5A,PTK2B,PIK3CG,ADORA1,CCL5,UBASH3B,CHGA,PDGFRA,GSTO1,LRP1,CCRL2,MARCKSL1,CMKLR1,TTC7,CHD7,P2RX7,TRPV2,SLC24A1,THY1,C1QTNF1,APOE,PLCG2,SLC8A1,TRF,RASA3,ADM,FTL1,DLG4,S100B,ATP13A2,ASPH,ACKR2,CIB2,TRPC…
GO:BP	positive regulation of T cell activation	GO:0050870	1.02456e-07	6.98946	197	1395	41	21118	CD244,IL1B,NLRP3,BTNL2,HAVCR2,IL1A,CCDC88B,RUNX3,CD86,AIF1,NCKAP1L,TNFSF13B,TNFSF14,CORO1A,RASAL3,ITGAL,SASH3,RHOH,IL1RL2,CCL2,PTPRC,CARD11,H2-AA,SLAMF1,SIRPA,DOCK8,NFKBID,PYCARD,CD74,CD83,SYK,CD80,CCL5,LGALS1,IL4RA,CD276,THY1,ADA,BLM,SOX4,ICOSL
GO:BP	metal ion homeostasis	GO:0055065	1.37663e-07	6.86118	685	1395	92	21118	IL1B,GPR35,TRPM2,SPP1,CD36,IL1A,C3AR1,CAPN3,F2RL2,ATP1A3,C5AR1,GNA15,CCR1,CX3CR1,P2RY6,SLC11A1,CCR5,GNG3,PTPN6,C5AR2,CORO1A,CD52,CXCR2,TFAP2B,CCL3,CCR6,HEXB,CCL2,PTPRC,GPR55,GPR18,SLC39A14,SLC35G1,ITGB3,MYO5A,PTK2B,PIK3CG,ADORA1,CCL5,UBASH3B,CHGA,PDGFRA,GSTO1,LRP1,CCRL2,MARCKSL1,ANK3,CMKLR1,TTC7,CHD7,P2RX7,TRPV2,SLC24A1,THY1,C1QTNF1,APOE,SNX10,PLCG2,SLC8A1,TRF,SNX5,RASA3,ADM,FTL1,DLG4,S100B,ATP13…
GO:BP	actin filament-based process	GO:0030029	1.41356e-07	6.84968	792	1395	102	21118	TRPM2,DOCK2,CLEC2I,RAC2,IL1A,CAPN3,HCK,AIF1,NCKAP1L,TNF,PLEK,CORO1A,WAS,TYROBP,CSF1R,KCNE3,FGR,MYO1G,ALOX15,RHOH,FMN1,SH3BP1,GPR65,FMNL1,PARVG,PDLIM4,SIRPA,PAK3,HCLS1,ITGB5,TLE6,PYCARD,CCL11,COTL1,MYO7A,ITGB3,ANG,MYO5A,SCN1B,PTK2B,ADD2,ESPN,GMFG,ADORA1,PCDH15,INA,ARAP1,ABI3,PDGFRA,CAMK2B,SPTBN2,NOX4,SEMA3E,MARCKSL1,BIN1,MARCKS,CDK5R1,LCP1,PPP1R9A,TGFBR1,PRKCD,ARHGDIB,EPS8,WASF1,CYFIP2,NTRK3,SH3KB…
GO:BP	tumor necrosis factor superfamily cytokine production	GO:0071706	1.41462e-07	6.84936	175	1395	38	21118	CLEC7A,HAVCR2,CD36,IL1A,CCL4,TREM2,CX3CR1,CCR5,PTPN6,C5AR2,FCER1G,PTAFR,TYROBP,CARD9,SASH3,GPNMB,CCL3,CCL2,PTPRC,OAS3,CYBB,TLR9,SLAMF1,SIRPA,PYCARD,CLEC4A2,GPR18,TLR1,ACP5,ARRB2,SYK,AXL,MIF,TMEM106A,EPHB2,TLR4,CYBA,TLR6
GO:BP	regulation of tumor necrosis factor superfamily cytokine production	GO:1903555	1.41462e-07	6.84936	175	1395	38	21118	CLEC7A,HAVCR2,CD36,IL1A,CCL4,TREM2,CX3CR1,CCR5,PTPN6,C5AR2,FCER1G,PTAFR,TYROBP,CARD9,SASH3,GPNMB,CCL3,CCL2,PTPRC,OAS3,CYBB,TLR9,SLAMF1,SIRPA,PYCARD,CLEC4A2,GPR18,TLR1,ACP5,ARRB2,SYK,AXL,MIF,TMEM106A,EPHB2,TLR4,CYBA,TLR6
GO:BP	granulocyte migration	GO:0097530	1.44331e-07	6.84064	152	1395	35	21118	IL1B,SPP1,RAC2,IL1A,VAV1,C3AR1,CCL4,NCKAP1L,C5AR1,TREM1,CCL12,LGALS3,CSF3R,C5AR2,FCER1G,CXCR2,CD300A,CSF1R,RHOH,CCL3,CCL6,CCL2,SLAMF1,SIRPA,CD74,CCL11,CCL9,SYK,CCL5,HRH1,IL17RA,CMKLR1,CAMK1D,CKLF,RHOG
GO:BP	negative regulation of lymphocyte activation	GO:0051250	1.44331e-07	6.84064	152	1395	35	21118	LAG3,HAVCR2,BTK,RUNX3,TNFRSF13B,TNFAIP8L2,CD86,BANK1,PTPN6,TYROBP,LST1,CD300A,GPNMB,FGR,LAPTM5,H2-AA,SOX11,NFKBID,SLFN1,CD74,PLA2G2D,CDKN2A,CEBPB,FGL2,PAG1,CD80,AXL,IL4RA,CD276,INPP5D,LOXL3,DTX1,SAMSN1,LYN,TNFRSF21
GO:BP	regulation of cell population proliferation	GO:0042127	1.50577e-07	6.82224	1753	1395	185	21118	CD244,IL1B,MLXIPL,HPSE,TSPAN32,CLEC7A,ITGAX,BTNL2,ADORA3,HAVCR2,CLEC2I,RAC2,EGLN3,IL1A,CCDC88B,BTK,C3AR1,RUNX3,TREM2,OSM,TNFRSF13B,TNFRSF9,HCK,CD86,AIF1,NCKAP1L,C5AR1,CCL12,HPGDS,CX3CR1,LGALS3,TNFSF13B,P2RY6,CCR5,PTPN6,TNF,C5AR2,PTAFR,CD37,CORO1A,RASAL3,CELA1,CXCR2,ITGAL,TYROBP,LST1,PTPRN,CD300A,SASH3,CSF1R,GPNMB,TFAP2B,IFI30,PTGS1,TMEM119,NEURL1A,RASSF5,ESM1,ALOX5,CCL2,HMGA2,PTPRC,NFATC2,LAPTM5,…
GO:BP	cell morphogenesis involved in neuron differentiation	GO:0048667	1.53725e-07	6.81325	603	1395	84	21118	RAC2,RUNX3,CCR5,ARHGAP4,CSF1R,RELN,SLITRK4,GAP43,RHOH,FMN1,KIF5A,TUBB3,SLITRK5,PAK3,MYO7A,DCX,CNTN4,CRMP1,SLITRK2,DCC,ATP8A2,DSCAM,ETV4,BCL11B,SCN1B,WNT7B,PCDH15,SEMA4A,PTPRO,EGR2,PTPRZ1,TUBB2B,ABI3,CAMK2A,KIF5C,PLXNC1,CAMK2B,LRP1,SEMA3E,NPTX1,ANK3,SEMA4D,DAB1,PLXNB2,CDK5R1,MAPK8IP2,PPP1R9A,TANC2,TRPV2,ACHE,RNF165,ARHGAP33,THY1,B4GALT6,NTRK3,APOE,EPHB2,MAPT,DBN1,NLGN3,PAK1,HEXA,DLG4,CTNNA2,UCHL1,…
GO:BP	regulation of leukocyte chemotaxis	GO:0002688	1.56329e-07	6.80596	123	1395	31	21118	IL1B,RAC2,C3AR1,CCL4,AIF1,NCKAP1L,C5AR1,CCL12,CCR1,SPI1,TNFSF14,C5AR2,CXCR2,CSF1R,CCL3,CCR6,CCL2,SLAMF1,LGMN,CD74,GPR18,PTK2B,CCL5,PGF,CMKLR1,MIF,CXCL14,GPSM3,CAMK1D,SERPINE1,LYN
GO:BP	regulation of immune effector process	GO:0002697	1.6211e-07	6.79019	339	1395	57	21118	CD244,IL13RA2,IL1B,SLAMF6,LILRB4A,NLRP3,CLEC7A,SCIMP,CD84,LAG3,DNASE1L3,FCGR1,HAVCR2,PRAM1,RAC2,CD36,C3,VAV1,BTK,CD86,SPI1,PTPN6,TNF,FCER1G,PTAFR,CD37,WAS,TYROBP,CD300A,SASH3,FGR,CCL2,PTPRC,LAPTM5,KLRB1B,TLR9,SLAMF1,NFKBID,CD74,KLRK1,UNC13D,ARRB2,FGL2,SYK,STXBP2,IL4RA,GRN,P2RX7,MIF,EPHB2,RIPK3,TLR4,LOXL3,SLC15A4,KIT,LYN,RPS19
GO:BP	positive regulation of immune effector process	GO:0002699	1.64081e-07	6.78494	233	1395	45	21118	CD244,IL13RA2,IL1B,SLAMF6,LILRB4A,NLRP3,CLEC7A,SCIMP,CD84,LAG3,FCGR1,RAC2,CD36,C3,VAV1,BTK,CD86,SPI1,TNF,FCER1G,PTAFR,CD37,TYROBP,CD300A,SASH3,FGR,CCL2,PTPRC,LAPTM5,TLR9,SLAMF1,NFKBID,CD74,KLRK1,UNC13D,SYK,STXBP2,IL4RA,P2RX7,MIF,EPHB2,TLR4,KIT,LYN,RPS19
GO:BP	positive regulation of macromolecule metabolic process	GO:0010604	1.76727e-07	6.7527	3467	1395	319	21118	CD244,IL1B,SLAMF6,APOB,MLXIPL,HPSE,NLRP3,IL1RN,CLEC7A,PKIB,SCIMP,ITGAX,PIRB,BTNL2,SPP1,FCGR1,HAVCR2,CD36,EGLN3,C3,IL1A,CCDC88B,C3AR1,RUNX3,CLEC5A,CCL4,TREM2,TLR7,CAPN3,OSM,NCF1,CD86,AIF1,NCKAP1L,C5AR1,FGD2,LY9,BANK1,CX3CR1,SLC11A1,CCR5,SPI1,BLNK,TNF,FCER1G,PTAFR,CD37,RXRG,CELA1,WAS,TYROBP,CARD9,PTPRN,CD300A,SASH3,CSF1R,RNF180,RELN,GPNMB,TFAP2B,TNNI2,FGR,TMEM119,NEURL1A,TICAM2,CCL3,RASSF5,CELF3,PO…
GO:BP	phagocytosis	GO:0006909	1.82541e-07	6.73864	340	1395	57	21118	IL1B,CLEC7A,CD300LF,DOCK2,FCGR1,RAC2,CD36,C3,VAV1,NCF4,TREM2,RAB39,BIN2,HCK,AIF1,NCKAP1L,ITGB2,P2RY6,SLC11A1,PLD4,TNF,FCER1G,CORO1A,ITGAL,TYROBP,CD300A,FGR,MYO1G,ALOX15,TICAM2,RHOH,SH3BP1,CCL2,RAB20,PTPRC,IRF8,C2,SLAMF1,SIRPA,NCF2,PYCARD,RAB7B,MYO7A,UNC13D,ITGB3,SYK,AXL,LRP1,P2RX7,TUB,RAP1GAP,CAMK1D,TLR4,RAB27A,CLN3,CYBA,RHOG
GO:BP	response to oxygen-containing compound	GO:1901700	1.99982e-07	6.69901	1820	1395	190	21118	IL1B,APOB,LILRB4A,MLXIPL,NLRP3,TBXAS1,SCIMP,HK3,TRPM2,SLC2A5,SPP1,MGARP,HAVCR2,HRH2,CD36,IL1A,BTK,TREM2,CD68,LY86,NCF1,FCGR4,CD86,AIF1,ATP1A3,C5AR1,CCL12,GNA15,ADCY7,CX3CR1,P2RY6,SLC11A1,HTR5B,CCR5,CD180,SPI1,TNF,PTAFR,CNR2,RXRG,CAR9,CARD9,PTPRN,P2RY12,NEURL1A,TICAM2,CCL3,IL10RA,CHRM3,RGS10,CCL2,IRF8,AKR1B8,CYBB,TLR9,IRS4,SIRPA,LGMN,HCN1,NCF2,GCNT1,INHBB,VGF,PYCARD,POSTN,KLRK1,SLC39A14,PTPRN2,ACP…
GO:BP	regulation of anatomical structure morphogenesis	GO:0022603	2.16086e-07	6.66537	963	1395	117	21118	IL1B,ITGAX,RAC2,CD36,C3,IL1A,C3AR1,HCK,C5AR1,CCL12,ITGB2,CX3CR1,TNFSF13B,CCR5,TNF,ARHGAP4,CORO1A,CELA1,CXCR2,CSF1R,RELN,FGR,RHOH,CCL3,SYT4,HEXB,ALOX5,CCL2,HMGA2,HK2,FMNL1,PDE3B,CYBB,PAK3,TNFRSF11B,POSTN,PIK3CD,CCL11,RNF157,SYT1,UNC13D,DCX,ITGB3,HPN,DSCAM,ANGPT2,PTK2B,CD44,WNT7B,CCL5,CSPG5,SEMA4A,PTPRZ1,COL4A3,ARAP1,ABI3,PDGFRA,PLXNC1,CAMK2B,PGF,LRP1,SEMA3E,SEMA4D,GRN,DAB1,PLXNB2,CDK5R1,PPP1R9A,TA…
GO:BP	antigen processing and presentation of peptide antigen via MHC class II	GO:0002495	2.21954e-07	6.65374	18	1395	12	21118	H2-OA,CTSS,TREM2,H2-OB,FCER1G,CTSE,IFI30,H2-AA,H2-DMB2,PYCARD,CD74,H2-DMA
GO:BP	regulation of T cell proliferation	GO:0042129	2.35563e-07	6.62789	170	1395	37	21118	CD244,IL1B,BTNL2,HAVCR2,CLEC2I,RAC2,IL1A,CCDC88B,CD86,AIF1,NCKAP1L,LGALS3,TNFSF13B,PTPN6,CORO1A,RASAL3,ITGAL,SASH3,GPNMB,PTPRC,LAPTM5,CARD11,H2-AA,SLAMF1,PYCARD,SLFN1,PLA2G2D,CDKN2A,CEBPB,SYK,CD80,CCL5,CD276,RIPK3,BLM,TNFRSF21,ICOSL
GO:BP	cytokine-mediated signaling pathway	GO:0019221	2.67934e-07	6.57197	419	1395	65	21118	IL13RA2,IL1B,GPR35,IL1RN,PIRB,CD300LF,IL1A,CCL4,TREM2,OSM,CCL12,CCR1,CX3CR1,TNFSF13B,CCR5,SPI1,CSF3R,PTPN6,TNF,FCER1G,CXCR2,PTPRN,CSF1R,CSF2RB,TICAM2,CCL3,IL10RA,CCR6,CCL6,IL21R,IL1RL2,CCL2,PTPRC,LAPTM5,OAS3,CSF2RA,CSF2RB2,PYCARD,CD74,CCL11,CCL9,CEBPA,EBI3,DOK1,IKBKE,SYK,PTK2B,CD44,CCL5,AXL,IL17RA,CCRL2,IRF5,IL4RA,CXCR4,AIM2,CASP1,ACKR2,KIT,TRAF4,VRK2,IFNGR2,TNFRSF23,EPOR,EXT1
[truncated: 864 more rows]

## Sheet: gProfiler DMG EC enriched
source	term_name	term_id	adjusted_p_value	negative_log10_of_adjusted_p_value	term_size	query_size	intersection_size	effective_domain_size	intersections	g
[truncated: 809 more rows]
